# Supplementary material
Source: PubMed Central journal article supplement (PMC6027907)
Supplement: 10.1194_D083014_jlr.D083014-1.pdf [file 10.1194_D083014_jlr.D083014-1.pdf]

## **SUPPLEMENTAL INFORMATION**

Journal of Lipid Research: Methods paper

### **Widely-targeted quantitative lipidomics methodology by supercritical fluid chromatography coupled with fast-scanning triple quadrupole mass spectrometry**

Hiroaki Takeda,<sup>1,\*</sup> Yoshihiro Izumi,<sup>1,\*</sup> Masatomo Takahashi,<sup>\*</sup> Thanai Paxton,<sup>†</sup> Shohei Tamura,<sup>§</sup> Tomonari Koike,<sup>§</sup> Ying Yu,<sup>§</sup> Noriko Kato,<sup>†</sup> Katsutoshi Nagase,<sup>†</sup> Masashi Shiomi,<sup>§</sup> Takeshi Bamba<sup>2,\*</sup>

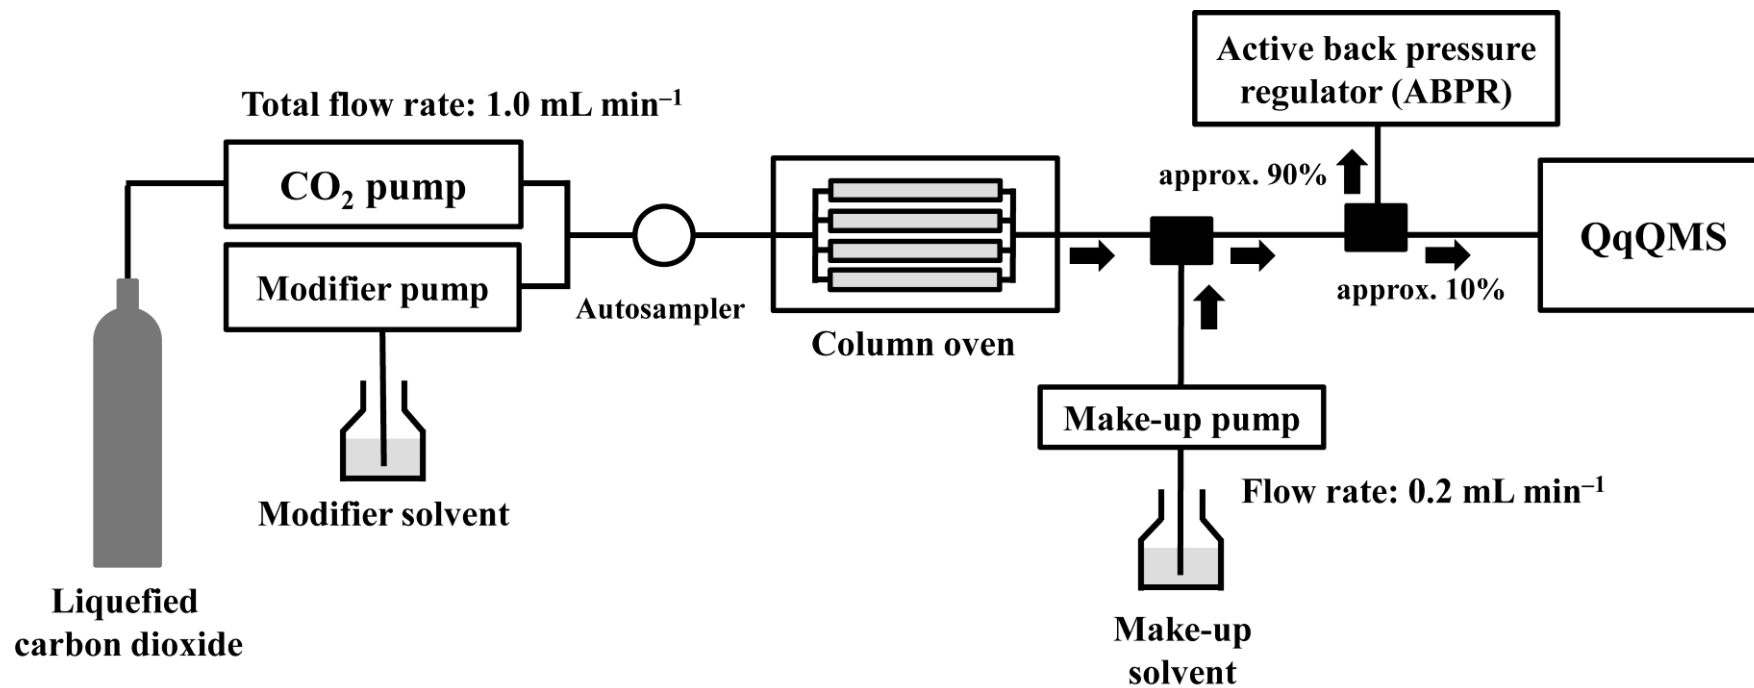

**Supplemental Fig. S1:** A schematic diagram of SFC/QqQMS system used in this study.

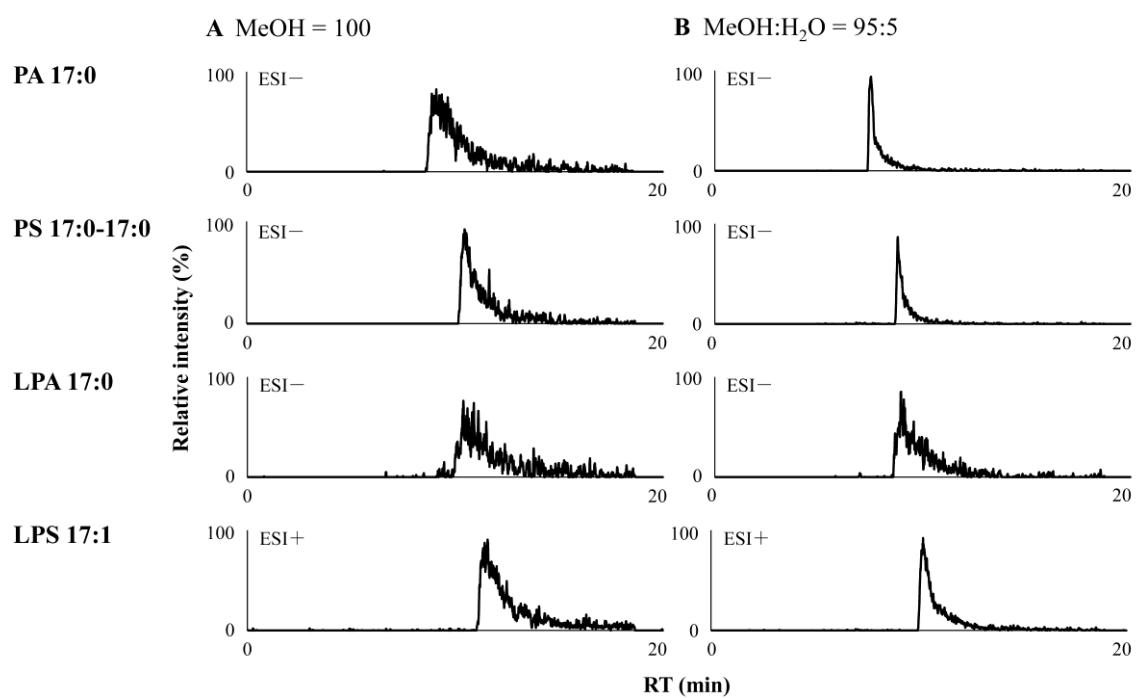

**Supplemental Fig. S2:** Improvement of peak shape of 4 polar lipids by addition of 5% water to the modifier solvent. (A) 100% methanol with 0.1% (w/v) ammonium acetate. (B) Methanol/water (95/5, v/v) with 0.1% (w/v) ammonium acetate.

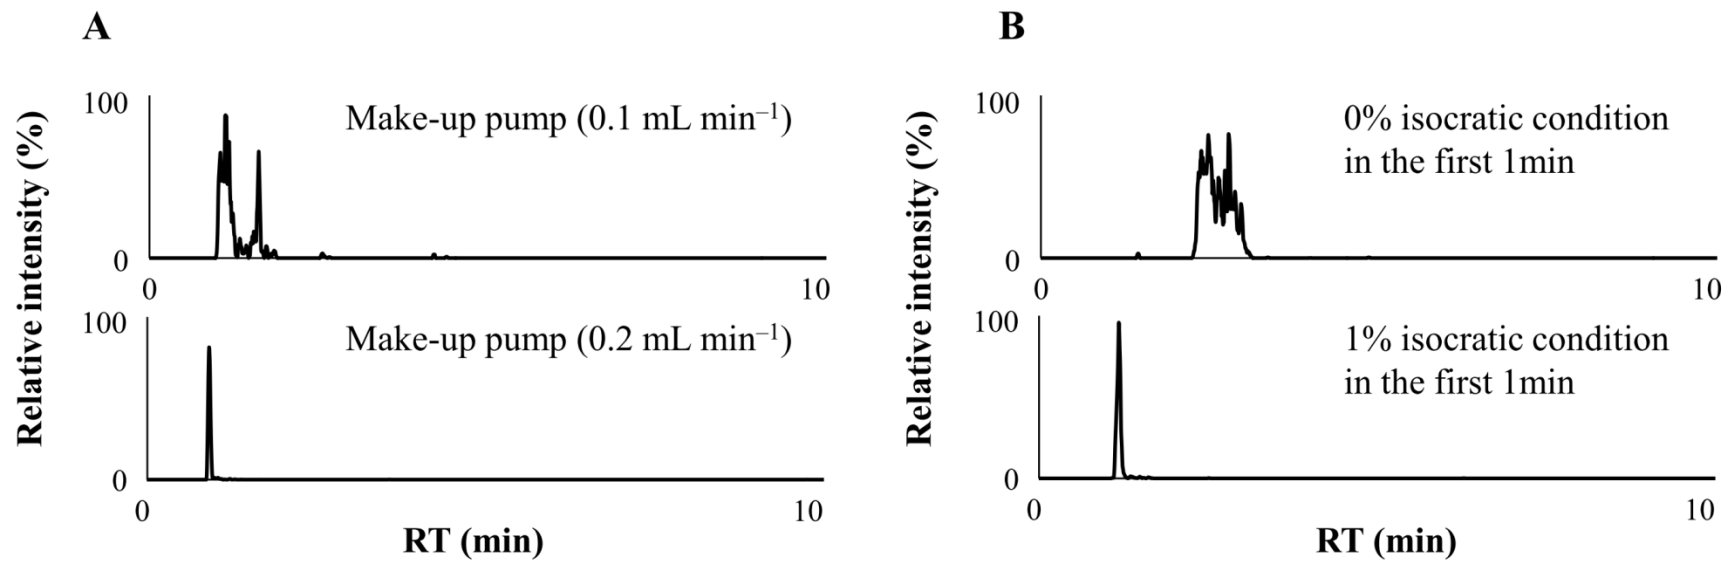

**Supplemental Fig. S3:** Improvement of peak shape of nonpolar lipid (CE 17:0) by optimization of flow rate of make-up pump (A) and modifier condition (B) in SFC/QqQMS with the BEH column.

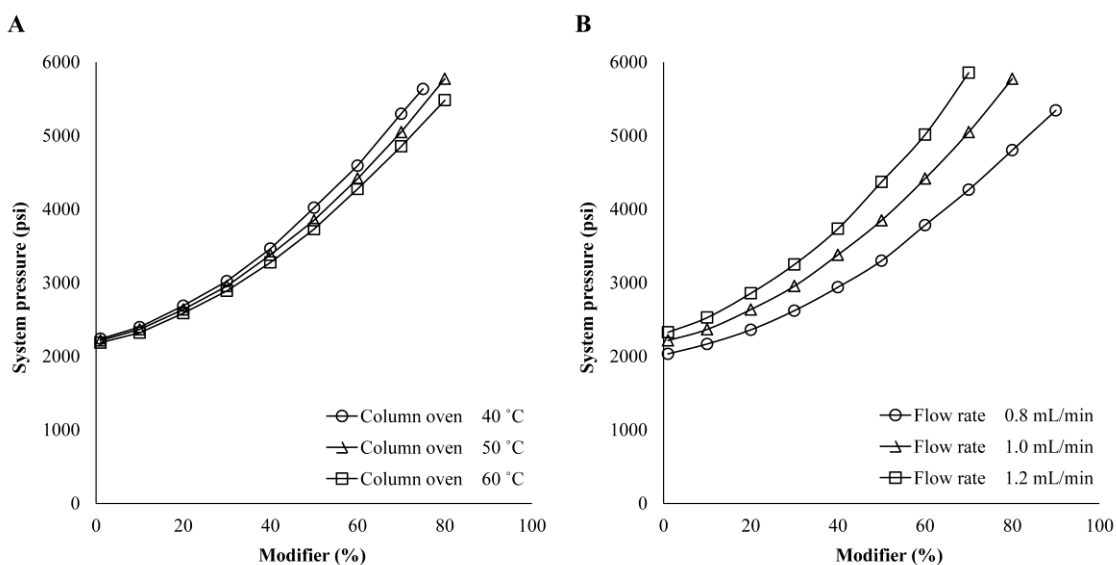

**Supplemental Fig. S4:** Effect of column oven temperature and flow rate on system pressure under various mobile phase conditions. (A) Column oven temperature, 40 °C, 50 °C, and 60 °C; ABPR, 1500 psi; and flow rate 1.0 mL min<sup>-1</sup>. (B) Column oven temperature, 50 °C; ABPR, 1500 psi; and flow rate 0.8 mL min<sup>-1</sup>, 1.0 mL min<sup>-1</sup>, and 1.2 mL min<sup>-1</sup>.

## DAG 12:0–12:0

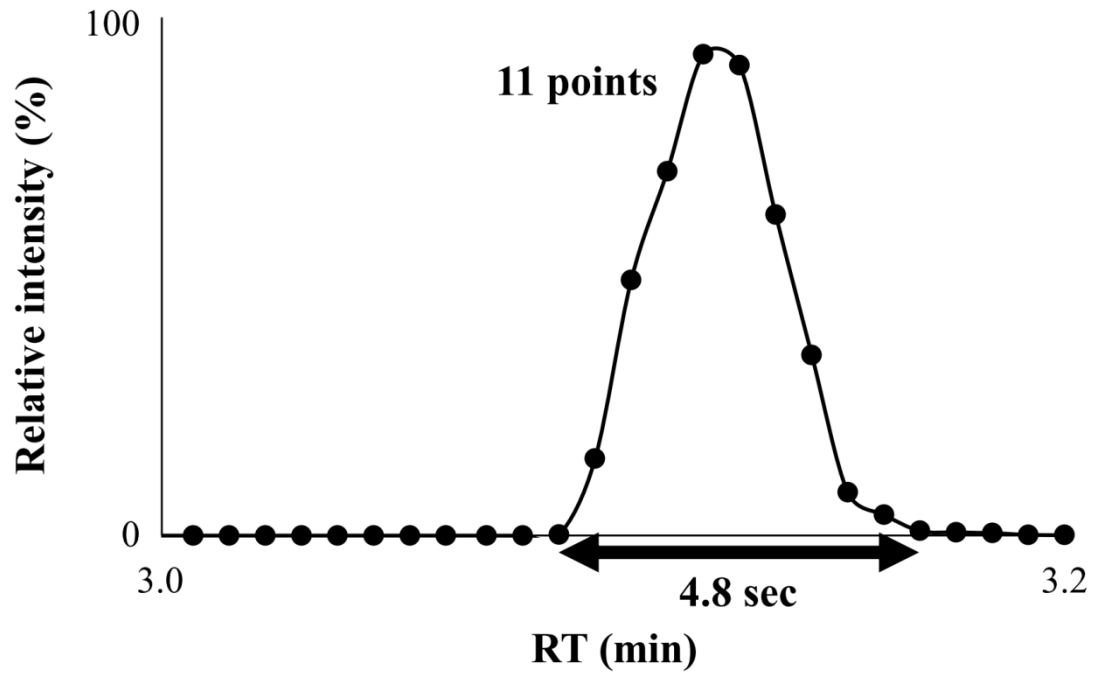

**Supplemental Fig. S5:** Evaluation of number of data points per peak. The MRM parameters per one time-period were as follows: limit on number of MRM transitions, 150; dwell time, 1 ms; MS inter-scan and inter-channel delay, 2 ms; and polarity switch inter-scan, 15 ms.

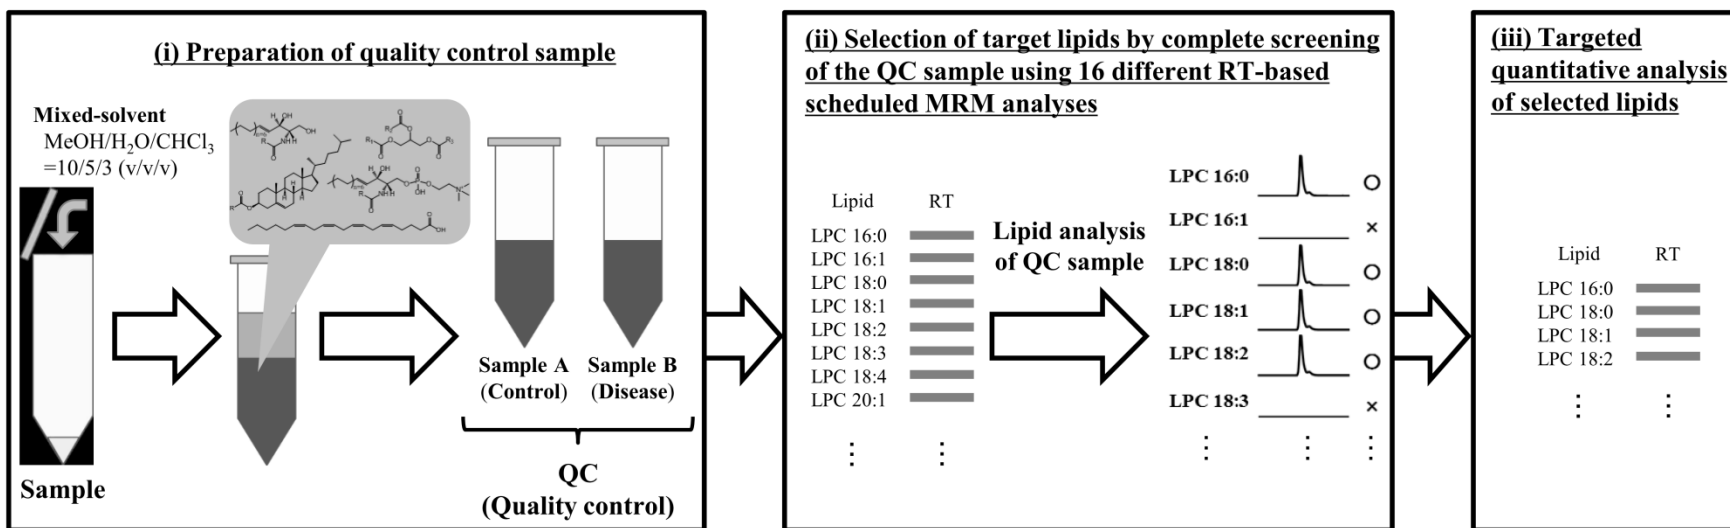

**Supplemental Fig. S6:** Flowchart of the widely-targeted quantitative lipidomics methodology.

**Supplemental Table S1:** Features of representative lipidomics methodologies.

|                               | DI/MS/MS | RP-LC/MS/MS | NP-LC/MS/MS | HILIC/MS/MS | SFC/MS/MS (in this study) |
|-------------------------------|----------|-------------|-------------|-------------|---------------------------|
| Throughput                    | +++      | ++          | ++          | +           | ++                        |
| Sensitivity                   | +        | +++         | ++          | +++         | +++                       |
| Identification of isomers     | +        | +++         | ++          | ++          | +++                       |
| The number of lipids detected | +        | +++         | ++          | ++          | +++                       |
| Quantitative performance      | +++      | +           | +++         | +++         | +++                       |

Each characteristic was evaluated in three stages (+, ++, and +++).



**Supplemental Table S2:** Fatty acid composition used for the setting of theoretically calculated a comprehensive lipid MRM library.

| Abbreviation | Main fatty acid                        | Abbreviation | Main fatty acid                                |
|--------------|----------------------------------------|--------------|------------------------------------------------|
| 12:0         | Lauric acid                            | 20:2         | Eicosadienoic acid ( <i>n</i> -6)              |
| 14:0         | Myristic acid                          | 20:3         | Dihomo- $\gamma$ -linoleic acid ( <i>n</i> -6) |
| 14:1         | Myristoleic acid ( <i>n</i> -5)        | 20:4         | Arachidonic acid ( <i>n</i> -6)                |
| 16:0         | Palmitic acid                          | 20:5         | Eicosapentaenoic acid ( <i>n</i> -3)           |
| 16:1         | Palmitoleic acid ( <i>n</i> -7)        | 22:6         | Behenic acid                                   |
| 18:0         | Stearic acid                           | 22:1         | Erucic acid ( <i>n</i> -9)                     |
| 18:1         | Oleic acid ( <i>n</i> -9)              | 22:2         | Docosadienoic acid ( <i>n</i> -6)              |
| 18:2         | Linoleic acid ( <i>n</i> -6)           | 22:3         | Docosatrienoic acid ( <i>n</i> -3)             |
| 18:3         | $\alpha$ -Linoleic acid ( <i>n</i> -3) | 22:4         | Docosatetraenoic acid ( <i>n</i> -6)           |
| 18:4         | Stearidonic acid ( <i>n</i> -3)        | 22:5         | Docosapentaenoic acid ( <i>n</i> -3)           |
| 20:0         | Arachidic acid                         | 22:6         | Docosahexaenoic acid ( <i>n</i> -3)            |
| 20:1         | Eicosenoic acid ( <i>n</i> -9)         |              |                                                |

Double bond positions (*n*).

**Supplemental Table S3:** MRM transition settings of 22 classes of lipids investigated.

| Lipid class                                  | Ion mode | The number of<br>MRM transition | MS <sup>1</sup> ( <i>m/z</i> )         | MS <sup>2</sup> ( <i>m/z</i> )                                                                                                                                        | Cone<br>voltage (V) | Collision<br>energy (V) |
|----------------------------------------------|----------|---------------------------------|----------------------------------------|-----------------------------------------------------------------------------------------------------------------------------------------------------------------------|---------------------|-------------------------|
| LPC                                          | ESI+     | 23                              | [M + H] <sup>+</sup>                   | 184.1                                                                                                                                                                 | 10                  | 30                      |
| LPE                                          | ESI+     | 23                              | [M + H] <sup>+</sup>                   | [M + H] <sup>+</sup> – 141.0                                                                                                                                          | 30                  | 20                      |
| LPG                                          | ESI+     | 23                              | [M + H] <sup>+</sup>                   | [M + H] <sup>+</sup> – 172.0                                                                                                                                          | 40                  | 20                      |
| LPA                                          | ESI–     | 23                              | [M – H] <sup>–</sup>                   | 153.8                                                                                                                                                                 | 10                  | 20                      |
| LPI                                          | ESI–     | 23                              | [M – H] <sup>–</sup>                   | 241                                                                                                                                                                   | 10                  | 40                      |
| LPS                                          | ESI+     | 23                              | [M + H] <sup>+</sup>                   | [M + H] <sup>+</sup> – 185.0                                                                                                                                          | 30                  | 20                      |
| PC                                           | ESI–     | 529                             | [M + CH <sub>3</sub> COO] <sup>–</sup> | [Acyl FA ( <i>sn</i> -1) – H] <sup>–</sup> and [Acyl FA ( <i>sn</i> -2) – H] <sup>–</sup>                                                                             | 15                  | 40                      |
| Alkyl-acyl PC (e) and/or Alkenyl-acyl PC (p) | ESI+     | 319                             | [M + H] <sup>+</sup>                   | [LPC FAe and/or FAp ( <i>sn</i> -1) + H] <sup>+</sup> and [LPC – OH] <sup>+</sup>                                                                                     | 20                  | 30                      |
| PE                                           | ESI–     | 529                             | [M – H] <sup>–</sup>                   | [Acyl FA ( <i>sn</i> -1) – H] <sup>–</sup> and [Acyl FA ( <i>sn</i> -2) – H] <sup>–</sup>                                                                             | 50                  | 25                      |
| Alkenyl-acyl PE (p)                          | ESI+     | 345                             | [M + H] <sup>+</sup>                   | [M – FA – (CH <sub>2</sub> =COHCH <sub>2</sub> OH)] <sup>+</sup>                                                                                                      | 20                  | 30                      |
| PG                                           | ESI–     | 529                             | [M – H] <sup>–</sup>                   | [Acyl FA ( <i>sn</i> -1) – H] <sup>–</sup> and [Acyl FA ( <i>sn</i> -2) – H] <sup>–</sup>                                                                             | 30                  | 40                      |
| PA                                           | ESI–     | 529                             | [M – H] <sup>–</sup>                   | [Acyl FA ( <i>sn</i> -1) – H] <sup>–</sup> and [Acyl FA ( <i>sn</i> -2) – H] <sup>–</sup>                                                                             | 20                  | 40                      |
| PI                                           | ESI–     | 529                             | [M – H] <sup>–</sup>                   | [Acyl FA ( <i>sn</i> -1) – H] <sup>–</sup> and [Acyl FA ( <i>sn</i> -2) – H] <sup>–</sup>                                                                             | 50                  | 50                      |
| PS                                           | ESI–     | 529                             | [M – H] <sup>–</sup>                   | [Acyl FA ( <i>sn</i> -1) – H] <sup>–</sup> and [Acyl FA ( <i>sn</i> -2) – H] <sup>–</sup>                                                                             | 30                  | 50                      |
| SM                                           | ESI+     | 23                              | [M + H] <sup>+</sup>                   | 184.1                                                                                                                                                                 | 50                  | 30                      |
| Cer                                          | ESI+     | 23                              | [M + H] <sup>+</sup>                   | [So dFA + H – H <sub>2</sub> O] <sup>+</sup>                                                                                                                          | 20                  | 30                      |
| CE                                           | ESI+     | 23                              | [M + NH <sub>4</sub> ] <sup>+</sup>    | 369.4                                                                                                                                                                 | 20                  | 10                      |
| MAG                                          | ESI+     | 23                              | [M + H] <sup>+</sup>                   | [M + H – H <sub>2</sub> O] <sup>+</sup>                                                                                                                               | 10                  | 10                      |
| DAG                                          | ESI+     | 529                             | [M + NH <sub>4</sub> ] <sup>+</sup>    | [M + NH <sub>4</sub> – NH <sub>3</sub> – Acyl FAFA ( <i>sn</i> -1)] <sup>+</sup> and [M + NH <sub>4</sub> – NH <sub>3</sub> – Acyl FAFA ( <i>sn</i> -2)] <sup>+</sup> | 50                  | 20                      |

|     |      |     |                |                |    |    |
|-----|------|-----|----------------|----------------|----|----|
| TAG | ESI+ | 167 | $[M + NH_4]^+$ | $[M + NH_4]^+$ | 10 | 10 |
| FFA | ESI- | 23  | $[M - H]^-$    | $[M - H]^-$    | 10 | 10 |

---

Ether-linked isobaric species of plasmanyln (e) and plasmeyln (p) analogs of glycerophospholipids.

Acyl positions of glycerolipids (*sn*-1 and *sn*-2).

**Supplemental Table S4:** Comparison of SFC separation behavior of lipid classes with six kinds of SFC columns.

| Lipid class        | RT (min) (Mean $\pm$ SD) ( $n = 5$ ) |                 |                  |                  |                 |                 |
|--------------------|--------------------------------------|-----------------|------------------|------------------|-----------------|-----------------|
|                    | BEH                                  | 2-EP            | 2-PIC            | DEA              | DIOL            | 1-AA            |
| CE 17:0            | 0.92 $\pm$ 0.02                      | 2.47 $\pm$ 0.09 | 2.82 $\pm$ 0.01  | 1.19 $\pm$ 0.01  | 1.32 $\pm$ 0.01 | 4.18 $\pm$ 0.01 |
| TAG 17:0-17:0-17:0 | 1.00 $\pm$ 0.01                      | 2.79 $\pm$ 0.01 | 2.98 $\pm$ 0.00  | 1.22 $\pm$ 0.05  | 1.78 $\pm$ 0.03 | 4.11 $\pm$ 0.01 |
| FFA 17:0           | 2.98 $\pm$ 0.01                      | 3.22 $\pm$ 0.01 | 3.53 $\pm$ 0.02  | 4.05 $\pm$ 0.01  | 3.01 $\pm$ 0.01 | 3.66 $\pm$ 0.02 |
| DAG 12:0-12:0      | 3.13 $\pm$ 0.02                      | 3.29 $\pm$ 0.02 | 3.41 $\pm$ 0.02  | 3.08 $\pm$ 0.01  | 3.13 $\pm$ 0.01 | 4.14 $\pm$ 0.00 |
| MAG 17:0           | 4.17 $\pm$ 0.02                      | 4.06 $\pm$ 0.03 | 4.30 $\pm$ 0.01  | 4.06 $\pm$ 0.02  | 4.03 $\pm$ 0.00 | 4.50 $\pm$ 0.01 |
| Cer d18:1-17:0     | 4.50 $\pm$ 0.01                      | 4.44 $\pm$ 0.00 | 4.54 $\pm$ 0.01  | 4.48 $\pm$ 0.01  | 4.40 $\pm$ 0.01 | 4.77 $\pm$ 0.01 |
| PG 17:0-17:0       | 6.77 $\pm$ 0.01                      | 5.72 $\pm$ 0.01 | 6.81 $\pm$ 0.00  | 8.86 $\pm$ 0.01  | 6.39 $\pm$ 0.00 | 6.75 $\pm$ 0.01 |
| PE 17:0-17:0       | 6.94 $\pm$ 0.01                      | 5.53 $\pm$ 0.01 | 5.95 $\pm$ 0.00  | 6.11 $\pm$ 0.01  | 5.75 $\pm$ 0.01 | 6.51 $\pm$ 0.00 |
| PA 17:0-17:0       | 7.12 $\pm$ 0.03                      | 9.23 $\pm$ 0.52 | 8.55 $\pm$ 0.25  | 12.37 $\pm$ 0.02 | 6.07 $\pm$ 0.01 | 7.66 $\pm$ 0.19 |
| LPG 17:1           | 7.94 $\pm$ 0.01                      | 6.39 $\pm$ 0.01 | 8.24 $\pm$ 0.01  | 11.04 $\pm$ 0.02 | 7.22 $\pm$ 0.01 | 7.46 $\pm$ 0.00 |
| LPE 17:1           | 8.30 $\pm$ 0.01                      | 6.16 $\pm$ 0.01 | 6.92 $\pm$ 0.00  | 7.49 $\pm$ 0.01  | 7.13 $\pm$ 0.00 | 7.25 $\pm$ 0.00 |
| PI 17:0-14:1       | 8.30 $\pm$ 0.01                      | 6.51 $\pm$ 0.01 | 9.05 $\pm$ 0.01  | 12.21 $\pm$ 0.01 | 8.01 $\pm$ 0.01 | 8.35 $\pm$ 0.01 |
| PS 17:0-17:0       | 8.80 $\pm$ 0.02                      | 6.79 $\pm$ 0.07 | 8.35 $\pm$ 0.02  | 12.27 $\pm$ 0.02 | 7.43 $\pm$ 0.01 | 8.51 $\pm$ 0.08 |
| LPA 17:0           | 8.97 $\pm$ 0.17                      | n.d.            | 10.85 $\pm$ 0.29 | 17.40 $\pm$ 0.06 | 7.32 $\pm$ 0.02 | 9.55 $\pm$ 0.53 |
| LPI 17:1           | 9.33 $\pm$ 0.01                      | 7.14 $\pm$ 0.04 | 10.41 $\pm$ 0.00 | 14.27 $\pm$ 0.02 | 9.27 $\pm$ 0.00 | 9.01 $\pm$ 0.02 |
| LPS 17:1           | 10.19 $\pm$ 0.05                     | 8.11 $\pm$ 0.36 | 10.10 $\pm$ 0.02 | 15.51 $\pm$ 0.02 | 9.02 $\pm$ 0.01 | 9.54 $\pm$ 0.11 |
| PC 17:0-17:0       | 10.21 $\pm$ 0.02                     | 6.73 $\pm$ 0.02 | 5.48 $\pm$ 0.01  | 5.36 $\pm$ 0.01  | 5.50 $\pm$ 0.01 | 6.34 $\pm$ 0.00 |
| SM d18:1-17:0      | 11.38 $\pm$ 0.03                     | 7.50 $\pm$ 0.02 | 5.90 $\pm$ 0.01  | 5.78 $\pm$ 0.01  | 6.11 $\pm$ 0.01 | 6.80 $\pm$ 0.00 |
| LPC 17:0           | 11.86 $\pm$ 0.03                     | 7.68 $\pm$ 0.02 | 6.19 $\pm$ 0.01  | 6.08 $\pm$ 0.01  | 6.49 $\pm$ 0.01 | 6.97 $\pm$ 0.00 |

**Supplemental Table S5: In-house lipid MRM library.**

| Method 1: DAG and PA (1) |               |           |        |         |        |                  |         |     |
|--------------------------|---------------|-----------|--------|---------|--------|------------------|---------|-----|
| No                       | Name          | Precursor | CV (V) | Product | CE (V) | RT setting (min) | IonMode | Ion |
| 1                        | DAG 12:0-12:0 | 474.4     | 50     | 257.2   | 20     | 3.25             | ES+     | 1   |
| 2                        | DAG 12:0-14:0 | 502.4     | 50     | 257.2   | 20     | 3.25             | ES+     | 1   |
| 3                        | DAG 12:0-14:0 | 502.4     | 50     | 285.3   | 20     | 3.25             | ES+     | 2   |
| 4                        | DAG 12:0-14:1 | 500.4     | 50     | 257.2   | 20     | 3.25             | ES+     | 1   |
| 5                        | DAG 12:0-14:1 | 500.4     | 50     | 283.3   | 20     | 3.25             | ES+     | 2   |
| 6                        | DAG 12:0-16:0 | 530.5     | 50     | 257.2   | 20     | 3.25             | ES+     | 1   |
| 7                        | DAG 12:0-16:0 | 530.5     | 50     | 313.3   | 20     | 3.25             | ES+     | 2   |
| 8                        | DAG 12:0-16:1 | 528.5     | 50     | 257.2   | 20     | 3.25             | ES+     | 1   |
| 9                        | DAG 12:0-16:1 | 528.5     | 50     | 311.3   | 20     | 3.25             | ES+     | 2   |
| 10                       | DAG 12:0-18:0 | 558.5     | 50     | 257.2   | 20     | 3.25             | ES+     | 1   |
| 11                       | DAG 12:0-18:0 | 558.5     | 50     | 341.3   | 20     | 3.25             | ES+     | 2   |
| 12                       | DAG 12:0-18:1 | 556.5     | 50     | 257.2   | 20     | 3.25             | ES+     | 1   |
| 13                       | DAG 12:0-18:1 | 556.5     | 50     | 339.3   | 20     | 3.25             | ES+     | 2   |
| 14                       | DAG 12:0-18:2 | 554.5     | 50     | 257.2   | 20     | 3.25             | ES+     | 1   |
| 15                       | DAG 12:0-18:2 | 554.5     | 50     | 337.3   | 20     | 3.25             | ES+     | 2   |
| 16                       | DAG 12:0-18:3 | 552.5     | 50     | 257.2   | 20     | 3.25             | ES+     | 1   |
| 17                       | DAG 12:0-18:3 | 552.5     | 50     | 335.3   | 20     | 3.25             | ES+     | 2   |
| 18                       | DAG 12:0-18:4 | 550.4     | 50     | 257.2   | 20     | 3.25             | ES+     | 1   |
| 19                       | DAG 12:0-18:4 | 550.4     | 50     | 333.3   | 20     | 3.25             | ES+     | 2   |
| 20                       | DAG 12:0-20:0 | 586.5     | 50     | 257.2   | 20     | 3.25             | ES+     | 1   |
| 21                       | DAG 12:0-20:0 | 586.5     | 50     | 369.4   | 20     | 3.25             | ES+     | 2   |
| 22                       | DAG 12:0-20:1 | 584.5     | 50     | 257.2   | 20     | 3.25             | ES+     | 1   |
| 23                       | DAG 12:0-20:1 | 584.5     | 50     | 367.3   | 20     | 3.25             | ES+     | 2   |
| 24                       | DAG 12:0-20:2 | 582.5     | 50     | 257.2   | 20     | 3.25             | ES+     | 1   |
| 25                       | DAG 12:0-20:2 | 582.5     | 50     | 365.3   | 20     | 3.25             | ES+     | 2   |
| 26                       | DAG 12:0-20:3 | 580.5     | 50     | 257.2   | 20     | 3.25             | ES+     | 1   |
| 27                       | DAG 12:0-20:3 | 580.5     | 50     | 363.3   | 20     | 3.25             | ES+     | 2   |
| 28                       | DAG 12:0-20:4 | 578.5     | 50     | 257.2   | 20     | 3.25             | ES+     | 1   |
| 29                       | DAG 12:0-20:4 | 578.5     | 50     | 361.3   | 20     | 3.25             | ES+     | 2   |
| 30                       | DAG 12:0-20:5 | 576.5     | 50     | 257.2   | 20     | 3.25             | ES+     | 1   |
| 31                       | DAG 12:0-20:5 | 576.5     | 50     | 359.3   | 20     | 3.25             | ES+     | 2   |
| 32                       | DAG 12:0-22:0 | 614.6     | 50     | 257.2   | 20     | 3.25             | ES+     | 1   |

|    |               |       |    |       |    |      |     |   |
|----|---------------|-------|----|-------|----|------|-----|---|
| 33 | DAG 12:0-22:0 | 614.6 | 50 | 397.4 | 20 | 3.25 | ES+ | 2 |
| 34 | DAG 12:0-22:1 | 612.6 | 50 | 257.2 | 20 | 3.25 | ES+ | 1 |
| 35 | DAG 12:0-22:1 | 612.6 | 50 | 395.4 | 20 | 3.25 | ES+ | 2 |
| 36 | DAG 12:0-22:2 | 610.5 | 50 | 257.2 | 20 | 3.25 | ES+ | 1 |
| 37 | DAG 12:0-22:2 | 610.5 | 50 | 393.4 | 20 | 3.25 | ES+ | 2 |
| 38 | DAG 12:0-22:3 | 608.5 | 50 | 257.2 | 20 | 3.25 | ES+ | 1 |
| 39 | DAG 12:0-22:3 | 608.5 | 50 | 391.3 | 20 | 3.25 | ES+ | 2 |
| 40 | DAG 12:0-22:4 | 606.5 | 50 | 257.2 | 20 | 3.25 | ES+ | 1 |
| 41 | DAG 12:0-22:4 | 606.5 | 50 | 389.3 | 20 | 3.25 | ES+ | 2 |
| 42 | DAG 12:0-22:5 | 604.5 | 50 | 257.2 | 20 | 3.25 | ES+ | 1 |
| 43 | DAG 12:0-22:5 | 604.5 | 50 | 387.3 | 20 | 3.25 | ES+ | 2 |
| 44 | DAG 12:0-22:6 | 602.5 | 50 | 257.2 | 20 | 3.25 | ES+ | 1 |
| 45 | DAG 12:0-22:6 | 602.5 | 50 | 385.3 | 20 | 3.25 | ES+ | 2 |
| 46 | DAG 14:0-14:0 | 530.5 | 50 | 285.3 | 20 | 3.25 | ES+ | 1 |
| 47 | DAG 14:0-14:1 | 528.5 | 50 | 283.3 | 20 | 3.25 | ES+ | 1 |
| 48 | DAG 14:0-14:1 | 528.5 | 50 | 285.3 | 20 | 3.25 | ES+ | 2 |
| 49 | DAG 14:0-16:0 | 558.5 | 50 | 285.3 | 20 | 3.25 | ES+ | 1 |
| 50 | DAG 14:0-16:0 | 558.5 | 50 | 313.3 | 20 | 3.25 | ES+ | 2 |
| 51 | DAG 14:0-16:1 | 556.5 | 50 | 285.3 | 20 | 3.25 | ES+ | 1 |
| 52 | DAG 14:0-16:1 | 556.5 | 50 | 311.3 | 20 | 3.25 | ES+ | 2 |
| 53 | DAG 14:0-18:0 | 586.5 | 50 | 285.3 | 20 | 3.25 | ES+ | 1 |
| 54 | DAG 14:0-18:0 | 586.5 | 50 | 341.3 | 20 | 3.25 | ES+ | 2 |
| 55 | DAG 14:0-18:1 | 584.5 | 50 | 285.3 | 20 | 3.25 | ES+ | 1 |
| 56 | DAG 14:0-18:1 | 584.5 | 50 | 339.3 | 20 | 3.25 | ES+ | 2 |
| 57 | DAG 14:0-18:2 | 582.5 | 50 | 285.3 | 20 | 3.25 | ES+ | 1 |
| 58 | DAG 14:0-18:2 | 582.5 | 50 | 337.3 | 20 | 3.25 | ES+ | 2 |
| 59 | DAG 14:0-18:3 | 580.5 | 50 | 285.3 | 20 | 3.25 | ES+ | 1 |
| 60 | DAG 14:0-18:3 | 580.5 | 50 | 335.3 | 20 | 3.25 | ES+ | 2 |
| 61 | DAG 14:0-18:4 | 578.5 | 50 | 285.3 | 20 | 3.25 | ES+ | 1 |
| 62 | DAG 14:0-18:4 | 578.5 | 50 | 333.3 | 20 | 3.25 | ES+ | 2 |
| 63 | DAG 14:0-20:0 | 614.6 | 50 | 285.3 | 20 | 3.25 | ES+ | 1 |
| 64 | DAG 14:0-20:0 | 614.6 | 50 | 369.4 | 20 | 3.25 | ES+ | 2 |
| 65 | DAG 14:0-20:1 | 612.6 | 50 | 285.3 | 20 | 3.25 | ES+ | 1 |
| 66 | DAG 14:0-20:1 | 612.6 | 50 | 367.3 | 20 | 3.25 | ES+ | 2 |
| 67 | DAG 14:0-20:2 | 610.5 | 50 | 285.3 | 20 | 3.25 | ES+ | 1 |

|     |               |       |    |       |    |      |     |   |
|-----|---------------|-------|----|-------|----|------|-----|---|
| 68  | DAG 14:0-20:2 | 610.5 | 50 | 365.3 | 20 | 3.25 | ES+ | 2 |
| 69  | DAG 14:0-20:3 | 608.5 | 50 | 285.3 | 20 | 3.25 | ES+ | 1 |
| 70  | DAG 14:0-20:3 | 608.5 | 50 | 363.3 | 20 | 3.25 | ES+ | 2 |
| 71  | DAG 14:0-20:4 | 606.5 | 50 | 285.3 | 20 | 3.25 | ES+ | 1 |
| 72  | DAG 14:0-20:4 | 606.5 | 50 | 361.3 | 20 | 3.25 | ES+ | 2 |
| 73  | DAG 14:0-20:5 | 604.5 | 50 | 285.3 | 20 | 3.25 | ES+ | 1 |
| 74  | DAG 14:0-20:5 | 604.5 | 50 | 359.3 | 20 | 3.25 | ES+ | 2 |
| 75  | DAG 14:0-22:0 | 642.6 | 50 | 285.3 | 20 | 3.25 | ES+ | 1 |
| 76  | DAG 14:0-22:0 | 642.6 | 50 | 397.4 | 20 | 3.25 | ES+ | 2 |
| 77  | DAG 14:0-22:1 | 640.6 | 50 | 285.3 | 20 | 3.25 | ES+ | 1 |
| 78  | DAG 14:0-22:1 | 640.6 | 50 | 395.4 | 20 | 3.25 | ES+ | 2 |
| 79  | DAG 14:0-22:2 | 638.6 | 50 | 285.3 | 20 | 3.25 | ES+ | 1 |
| 80  | DAG 14:0-22:2 | 638.6 | 50 | 393.4 | 20 | 3.25 | ES+ | 2 |
| 81  | DAG 14:0-22:3 | 636.6 | 50 | 285.3 | 20 | 3.25 | ES+ | 1 |
| 82  | DAG 14:0-22:3 | 636.6 | 50 | 391.3 | 20 | 3.25 | ES+ | 2 |
| 83  | DAG 14:0-22:4 | 634.5 | 50 | 285.3 | 20 | 3.25 | ES+ | 1 |
| 84  | DAG 14:0-22:4 | 634.5 | 50 | 389.3 | 20 | 3.25 | ES+ | 2 |
| 85  | DAG 14:0-22:5 | 632.5 | 50 | 285.3 | 20 | 3.25 | ES+ | 1 |
| 86  | DAG 14:0-22:5 | 632.5 | 50 | 387.3 | 20 | 3.25 | ES+ | 2 |
| 87  | DAG 14:0-22:6 | 630.5 | 50 | 285.3 | 20 | 3.25 | ES+ | 1 |
| 88  | DAG 14:0-22:6 | 630.5 | 50 | 385.3 | 20 | 3.25 | ES+ | 2 |
| 89  | DAG 14:1-14:1 | 526.4 | 50 | 283.3 | 20 | 3.25 | ES+ | 1 |
| 90  | DAG 14:1-16:0 | 556.5 | 50 | 283.3 | 20 | 3.25 | ES+ | 1 |
| 91  | DAG 14:1-16:0 | 556.5 | 50 | 313.3 | 20 | 3.25 | ES+ | 2 |
| 92  | DAG 14:1-16:1 | 554.5 | 50 | 283.3 | 20 | 3.25 | ES+ | 1 |
| 93  | DAG 14:1-16:1 | 554.5 | 50 | 311.3 | 20 | 3.25 | ES+ | 2 |
| 94  | DAG 14:1-18:0 | 584.5 | 50 | 283.3 | 20 | 3.25 | ES+ | 1 |
| 95  | DAG 14:1-18:0 | 584.5 | 50 | 341.3 | 20 | 3.25 | ES+ | 2 |
| 96  | DAG 14:1-18:1 | 582.5 | 50 | 283.3 | 20 | 3.25 | ES+ | 1 |
| 97  | DAG 14:1-18:1 | 582.5 | 50 | 339.3 | 20 | 3.25 | ES+ | 2 |
| 98  | DAG 14:1-18:2 | 580.5 | 50 | 283.3 | 20 | 3.25 | ES+ | 1 |
| 99  | DAG 14:1-18:2 | 580.5 | 50 | 337.3 | 20 | 3.25 | ES+ | 2 |
| 100 | DAG 14:1-18:3 | 578.5 | 50 | 283.3 | 20 | 3.25 | ES+ | 1 |
| 101 | DAG 14:1-18:3 | 578.5 | 50 | 335.3 | 20 | 3.25 | ES+ | 2 |
| 102 | DAG 14:1-18:4 | 576.5 | 50 | 283.3 | 20 | 3.25 | ES+ | 1 |

|     |               |       |    |       |    |      |     |   |
|-----|---------------|-------|----|-------|----|------|-----|---|
| 103 | DAG 14:1-18:4 | 576.5 | 50 | 333.3 | 20 | 3.25 | ES+ | 2 |
| 104 | DAG 14:1-20:0 | 612.6 | 50 | 283.3 | 20 | 3.25 | ES+ | 1 |
| 105 | DAG 14:1-20:0 | 612.6 | 50 | 369.4 | 20 | 3.25 | ES+ | 2 |
| 106 | DAG 14:1-20:1 | 610.5 | 50 | 283.3 | 20 | 3.25 | ES+ | 1 |
| 107 | DAG 14:1-20:1 | 610.5 | 50 | 367.3 | 20 | 3.25 | ES+ | 2 |
| 108 | DAG 14:1-20:2 | 608.5 | 50 | 283.3 | 20 | 3.25 | ES+ | 1 |
| 109 | DAG 14:1-20:2 | 608.5 | 50 | 365.3 | 20 | 3.25 | ES+ | 2 |
| 110 | DAG 14:1-20:3 | 606.5 | 50 | 283.3 | 20 | 3.25 | ES+ | 1 |
| 111 | DAG 14:1-20:3 | 606.5 | 50 | 363.3 | 20 | 3.25 | ES+ | 2 |
| 112 | DAG 14:1-20:4 | 604.5 | 50 | 283.3 | 20 | 3.25 | ES+ | 1 |
| 113 | DAG 14:1-20:4 | 604.5 | 50 | 361.3 | 20 | 3.25 | ES+ | 2 |
| 114 | DAG 14:1-20:5 | 602.5 | 50 | 283.3 | 20 | 3.25 | ES+ | 1 |
| 115 | DAG 14:1-20:5 | 602.5 | 50 | 359.3 | 20 | 3.25 | ES+ | 2 |
| 116 | DAG 14:1-22:0 | 640.6 | 50 | 283.3 | 20 | 3.25 | ES+ | 1 |
| 117 | DAG 14:1-22:0 | 640.6 | 50 | 397.4 | 20 | 3.25 | ES+ | 2 |
| 118 | DAG 14:1-22:1 | 638.6 | 50 | 283.3 | 20 | 3.25 | ES+ | 1 |
| 119 | DAG 14:1-22:1 | 638.6 | 50 | 395.4 | 20 | 3.25 | ES+ | 2 |
| 120 | DAG 14:1-22:2 | 636.6 | 50 | 283.3 | 20 | 3.25 | ES+ | 1 |
| 121 | DAG 14:1-22:2 | 636.6 | 50 | 393.4 | 20 | 3.25 | ES+ | 2 |
| 122 | DAG 14:1-22:3 | 634.5 | 50 | 283.3 | 20 | 3.25 | ES+ | 1 |
| 123 | DAG 14:1-22:3 | 634.5 | 50 | 391.3 | 20 | 3.25 | ES+ | 2 |
| 124 | DAG 14:1-22:4 | 632.5 | 50 | 283.3 | 20 | 3.25 | ES+ | 1 |
| 125 | DAG 14:1-22:4 | 632.5 | 50 | 389.3 | 20 | 3.25 | ES+ | 2 |
| 126 | DAG 14:1-22:5 | 630.5 | 50 | 283.3 | 20 | 3.25 | ES+ | 1 |
| 127 | DAG 14:1-22:5 | 630.5 | 50 | 387.3 | 20 | 3.25 | ES+ | 2 |
| 128 | DAG 14:1-22:6 | 628.5 | 50 | 283.3 | 20 | 3.25 | ES+ | 1 |
| 129 | DAG 14:1-22:6 | 628.5 | 50 | 385.3 | 20 | 3.25 | ES+ | 2 |
| 130 | DAG 16:0-16:0 | 586.5 | 50 | 313.3 | 20 | 3.25 | ES+ | 1 |
| 131 | DAG 16:0-16:1 | 584.5 | 50 | 311.3 | 20 | 3.25 | ES+ | 1 |
| 132 | DAG 16:0-16:1 | 584.5 | 50 | 313.3 | 20 | 3.25 | ES+ | 2 |
| 133 | DAG 16:0-18:0 | 614.6 | 50 | 313.3 | 20 | 3.25 | ES+ | 1 |
| 134 | DAG 16:0-18:0 | 614.6 | 50 | 341.3 | 20 | 3.25 | ES+ | 2 |
| 135 | DAG 16:0-18:1 | 612.6 | 50 | 313.3 | 20 | 3.25 | ES+ | 1 |
| 136 | DAG 16:0-18:1 | 612.6 | 50 | 339.3 | 20 | 3.25 | ES+ | 2 |
| 137 | DAG 16:0-18:2 | 610.5 | 50 | 313.3 | 20 | 3.25 | ES+ | 1 |



|     |               |       |    |       |    |       |     |   |
|-----|---------------|-------|----|-------|----|-------|-----|---|
| 138 | DAG 16:0-18:2 | 610.5 | 50 | 337.3 | 20 | 3.25  | ES+ | 2 |
| 139 | DAG 16:0-18:3 | 608.5 | 50 | 313.3 | 20 | 3.25  | ES+ | 1 |
| 140 | DAG 16:0-18:3 | 608.5 | 50 | 335.3 | 20 | 3.25  | ES+ | 2 |
| 141 | DAG 16:0-18:4 | 606.5 | 50 | 313.3 | 20 | 3.25  | ES+ | 1 |
| 142 | DAG 16:0-18:4 | 606.5 | 50 | 333.3 | 20 | 3.25  | ES+ | 2 |
| 143 | PA 12:0-12:0  | 535.3 | 20 | 199.3 | 40 | 12.43 | ES- | 1 |
| 144 | PA 12:0-14:0  | 563.4 | 20 | 199.3 | 40 | 12.43 | ES- | 1 |
| 145 | PA 12:0-14:0  | 563.4 | 20 | 227.3 | 40 | 12.43 | ES- | 2 |
| 146 | PA 12:0-14:1  | 561.4 | 20 | 199.3 | 40 | 12.43 | ES- | 1 |
| 147 | PA 12:0-14:1  | 561.4 | 20 | 225.3 | 40 | 12.43 | ES- | 2 |
| 148 | PA 12:0-16:0  | 591.4 | 20 | 199.3 | 40 | 12.43 | ES- | 1 |
| 149 | PA 12:0-16:0  | 591.4 | 20 | 255.3 | 40 | 12.43 | ES- | 2 |
| 150 | PA 12:0-16:1  | 589.4 | 20 | 199.3 | 40 | 12.43 | ES- | 1 |
| 151 | PA 12:0-16:1  | 589.4 | 20 | 253.3 | 40 | 12.43 | ES- | 2 |
| 152 | PA 12:0-18:0  | 619.4 | 20 | 199.3 | 40 | 12.43 | ES- | 1 |
| 153 | PA 12:0-18:0  | 619.4 | 20 | 283.3 | 40 | 12.43 | ES- | 2 |
| 154 | PA 12:0-18:1  | 617.4 | 20 | 199.3 | 40 | 12.43 | ES- | 1 |
| 155 | PA 12:0-18:1  | 617.4 | 20 | 281.3 | 40 | 12.43 | ES- | 2 |
| 156 | PA 12:0-18:2  | 615.4 | 20 | 199.3 | 40 | 12.43 | ES- | 1 |
| 157 | PA 12:0-18:2  | 615.4 | 20 | 279.3 | 40 | 12.43 | ES- | 2 |
| 158 | PA 12:0-18:3  | 613.4 | 20 | 199.3 | 40 | 12.43 | ES- | 1 |
| 159 | PA 12:0-18:3  | 613.4 | 20 | 277.3 | 40 | 12.43 | ES- | 2 |
| 160 | PA 12:0-18:4  | 611.4 | 20 | 199.3 | 40 | 12.43 | ES- | 1 |
| 161 | PA 12:0-18:4  | 611.4 | 20 | 275.3 | 40 | 12.43 | ES- | 2 |
| 162 | PA 12:0-20:0  | 647.5 | 20 | 199.3 | 40 | 12.43 | ES- | 1 |
| 163 | PA 12:0-20:0  | 647.5 | 20 | 311.2 | 40 | 12.43 | ES- | 2 |
| 164 | PA 12:0-20:1  | 645.5 | 20 | 199.3 | 40 | 12.43 | ES- | 1 |
| 165 | PA 12:0-20:1  | 645.5 | 20 | 309.2 | 40 | 12.43 | ES- | 2 |
| 166 | PA 12:0-20:2  | 643.4 | 20 | 199.3 | 40 | 12.43 | ES- | 1 |
| 167 | PA 12:0-20:2  | 643.4 | 20 | 307.2 | 40 | 12.43 | ES- | 2 |
| 168 | PA 12:0-20:3  | 641.4 | 20 | 199.3 | 40 | 12.43 | ES- | 1 |
| 169 | PA 12:0-20:3  | 641.4 | 20 | 305.2 | 40 | 12.43 | ES- | 2 |
| 170 | PA 12:0-20:4  | 639.4 | 20 | 199.3 | 40 | 12.43 | ES- | 1 |
| 171 | PA 12:0-20:4  | 639.4 | 20 | 303.2 | 40 | 12.43 | ES- | 2 |
| 172 | PA 12:0-20:5  | 637.4 | 20 | 199.3 | 40 | 12.43 | ES- | 1 |

|     |              |       |    |       |    |       |     |   |
|-----|--------------|-------|----|-------|----|-------|-----|---|
| 173 | PA 12:0-20:5 | 637.4 | 20 | 301.2 | 40 | 12.43 | ES- | 2 |
| 174 | PA 12:0-22:0 | 675.5 | 20 | 199.3 | 40 | 12.43 | ES- | 1 |
| 175 | PA 12:0-22:0 | 675.5 | 20 | 339.2 | 40 | 12.43 | ES- | 2 |
| 176 | PA 12:0-22:1 | 673.5 | 20 | 199.3 | 40 | 12.43 | ES- | 1 |
| 177 | PA 12:0-22:1 | 673.5 | 20 | 337.2 | 40 | 12.43 | ES- | 2 |
| 178 | PA 12:0-22:2 | 671.5 | 20 | 199.3 | 40 | 12.43 | ES- | 1 |
| 179 | PA 12:0-22:2 | 671.5 | 20 | 335.2 | 40 | 12.43 | ES- | 2 |
| 180 | PA 12:0-22:3 | 669.5 | 20 | 199.3 | 40 | 12.43 | ES- | 1 |
| 181 | PA 12:0-22:3 | 669.5 | 20 | 333.2 | 40 | 12.43 | ES- | 2 |
| 182 | PA 12:0-22:4 | 667.4 | 20 | 199.3 | 40 | 12.43 | ES- | 1 |
| 183 | PA 12:0-22:4 | 667.4 | 20 | 331.2 | 40 | 12.43 | ES- | 2 |
| 184 | PA 12:0-22:5 | 665.4 | 20 | 199.3 | 40 | 12.43 | ES- | 1 |
| 185 | PA 12:0-22:5 | 665.4 | 20 | 329.2 | 40 | 12.43 | ES- | 2 |
| 186 | PA 12:0-22:6 | 663.4 | 20 | 199.3 | 40 | 12.43 | ES- | 1 |
| 187 | PA 12:0-22:6 | 663.4 | 20 | 327.2 | 40 | 12.43 | ES- | 2 |
| 188 | PA 14:0-14:0 | 591.4 | 20 | 227.3 | 40 | 12.43 | ES- | 1 |
| 189 | PA 14:0-14:1 | 589.4 | 20 | 225.3 | 40 | 12.43 | ES- | 1 |
| 190 | PA 14:0-14:1 | 589.4 | 20 | 227.3 | 40 | 12.43 | ES- | 2 |
| 191 | PA 14:0-16:0 | 619.4 | 20 | 227.3 | 40 | 12.43 | ES- | 1 |
| 192 | PA 14:0-16:0 | 619.4 | 20 | 255.3 | 40 | 12.43 | ES- | 2 |
| 193 | PA 14:0-16:1 | 617.4 | 20 | 227.3 | 40 | 12.43 | ES- | 1 |
| 194 | PA 14:0-16:1 | 617.4 | 20 | 253.3 | 40 | 12.43 | ES- | 2 |
| 195 | PA 14:0-18:0 | 647.5 | 20 | 227.3 | 40 | 12.43 | ES- | 1 |
| 196 | PA 14:0-18:0 | 647.5 | 20 | 283.3 | 40 | 12.43 | ES- | 2 |
| 197 | PA 14:0-18:1 | 645.5 | 20 | 227.3 | 40 | 12.43 | ES- | 1 |
| 198 | PA 14:0-18:1 | 645.5 | 20 | 281.3 | 40 | 12.43 | ES- | 2 |
| 199 | PA 14:0-18:2 | 643.4 | 20 | 227.3 | 40 | 12.43 | ES- | 1 |
| 200 | PA 14:0-18:2 | 643.4 | 20 | 279.3 | 40 | 12.43 | ES- | 2 |
| 201 | PA 14:0-18:3 | 641.4 | 20 | 227.3 | 40 | 12.43 | ES- | 1 |
| 202 | PA 14:0-18:3 | 641.4 | 20 | 277.3 | 40 | 12.43 | ES- | 2 |
| 203 | PA 14:0-18:4 | 639.4 | 20 | 227.3 | 40 | 12.43 | ES- | 1 |
| 204 | PA 14:0-18:4 | 639.4 | 20 | 275.3 | 40 | 12.43 | ES- | 2 |
| 205 | PA 14:0-20:0 | 675.5 | 20 | 227.3 | 40 | 12.43 | ES- | 1 |
| 206 | PA 14:0-20:0 | 675.5 | 20 | 311.2 | 40 | 12.43 | ES- | 2 |
| 207 | PA 14:0-20:1 | 673.5 | 20 | 227.3 | 40 | 12.43 | ES- | 1 |

|     |              |       |    |       |    |       |     |   |
|-----|--------------|-------|----|-------|----|-------|-----|---|
| 208 | PA 14:0-20:1 | 673.5 | 20 | 309.2 | 40 | 12.43 | ES- | 2 |
| 209 | PA 14:0-20:2 | 671.5 | 20 | 227.3 | 40 | 12.43 | ES- | 1 |
| 210 | PA 14:0-20:2 | 671.5 | 20 | 307.2 | 40 | 12.43 | ES- | 2 |
| 211 | PA 14:0-20:3 | 669.5 | 20 | 227.3 | 40 | 12.43 | ES- | 1 |
| 212 | PA 14:0-20:3 | 669.5 | 20 | 305.2 | 40 | 12.43 | ES- | 2 |
| 213 | PA 14:0-20:4 | 667.4 | 20 | 227.3 | 40 | 12.43 | ES- | 1 |
| 214 | PA 14:0-20:4 | 667.4 | 20 | 303.2 | 40 | 12.43 | ES- | 2 |
| 215 | PA 14:0-20:5 | 665.4 | 20 | 227.3 | 40 | 12.43 | ES- | 1 |
| 216 | PA 14:0-20:5 | 665.4 | 20 | 301.2 | 40 | 12.43 | ES- | 2 |
| 217 | PA 14:0-22:0 | 703.5 | 20 | 227.3 | 40 | 12.43 | ES- | 1 |
| 218 | PA 14:0-22:0 | 703.5 | 20 | 339.2 | 40 | 12.43 | ES- | 2 |
| 219 | PA 14:0-22:1 | 701.5 | 20 | 227.3 | 40 | 12.43 | ES- | 1 |
| 220 | PA 14:0-22:1 | 701.5 | 20 | 337.2 | 40 | 12.43 | ES- | 2 |
| 221 | PA 14:0-22:2 | 699.5 | 20 | 227.3 | 40 | 12.43 | ES- | 1 |
| 222 | PA 14:0-22:2 | 699.5 | 20 | 335.2 | 40 | 12.43 | ES- | 2 |
| 223 | PA 14:0-22:3 | 697.5 | 20 | 227.3 | 40 | 12.43 | ES- | 1 |
| 224 | PA 14:0-22:3 | 697.5 | 20 | 333.2 | 40 | 12.43 | ES- | 2 |
| 225 | PA 14:0-22:4 | 695.5 | 20 | 227.3 | 40 | 12.43 | ES- | 1 |
| 226 | PA 14:0-22:4 | 695.5 | 20 | 331.2 | 40 | 12.43 | ES- | 2 |
| 227 | PA 14:0-22:5 | 693.5 | 20 | 227.3 | 40 | 12.43 | ES- | 1 |
| 228 | PA 14:0-22:5 | 693.5 | 20 | 329.2 | 40 | 12.43 | ES- | 2 |
| 229 | PA 14:0-22:6 | 691.4 | 20 | 227.3 | 40 | 12.43 | ES- | 1 |
| 230 | PA 14:0-22:6 | 691.4 | 20 | 327.2 | 40 | 12.43 | ES- | 2 |
| 231 | PA 14:1-14:1 | 587.4 | 20 | 225.3 | 40 | 12.43 | ES- | 1 |
| 232 | PA 14:1-16:0 | 617.4 | 20 | 225.3 | 40 | 12.43 | ES- | 1 |
| 233 | PA 14:1-16:0 | 617.4 | 20 | 255.3 | 40 | 12.43 | ES- | 2 |
| 234 | PA 14:1-16:1 | 615.4 | 20 | 225.3 | 40 | 12.43 | ES- | 1 |
| 235 | PA 14:1-16:1 | 615.4 | 20 | 253.3 | 40 | 12.43 | ES- | 2 |
| 236 | PA 14:1-18:0 | 645.5 | 20 | 225.3 | 40 | 12.43 | ES- | 1 |
| 237 | PA 14:1-18:0 | 645.5 | 20 | 283.3 | 40 | 12.43 | ES- | 2 |
| 238 | PA 14:1-18:1 | 643.4 | 20 | 225.3 | 40 | 12.43 | ES- | 1 |
| 239 | PA 14:1-18:1 | 643.4 | 20 | 281.3 | 40 | 12.43 | ES- | 2 |
| 240 | PA 14:1-18:2 | 641.4 | 20 | 225.3 | 40 | 12.43 | ES- | 1 |
| 241 | PA 14:1-18:2 | 641.4 | 20 | 279.3 | 40 | 12.43 | ES- | 2 |
| 242 | PA 14:1-18:3 | 639.4 | 20 | 225.3 | 40 | 12.43 | ES- | 1 |

|     |              |       |    |       |    |       |     |   |
|-----|--------------|-------|----|-------|----|-------|-----|---|
| 243 | PA 14:1-18:3 | 639.4 | 20 | 277.3 | 40 | 12.43 | ES- | 2 |
| 244 | PA 14:1-18:4 | 637.4 | 20 | 225.3 | 40 | 12.43 | ES- | 1 |
| 245 | PA 14:1-18:4 | 637.4 | 20 | 275.3 | 40 | 12.43 | ES- | 2 |
| 246 | PA 14:1-20:0 | 673.5 | 20 | 225.3 | 40 | 12.43 | ES- | 1 |
| 247 | PA 14:1-20:0 | 673.5 | 20 | 311.2 | 40 | 12.43 | ES- | 2 |
| 248 | PA 14:1-20:1 | 671.5 | 20 | 225.3 | 40 | 12.43 | ES- | 1 |
| 249 | PA 14:1-20:1 | 671.5 | 20 | 309.2 | 40 | 12.43 | ES- | 2 |
| 250 | PA 14:1-20:2 | 669.5 | 20 | 225.3 | 40 | 12.43 | ES- | 1 |
| 251 | PA 14:1-20:2 | 669.5 | 20 | 307.2 | 40 | 12.43 | ES- | 2 |
| 252 | PA 14:1-20:3 | 667.4 | 20 | 225.3 | 40 | 12.43 | ES- | 1 |
| 253 | PA 14:1-20:3 | 667.4 | 20 | 305.2 | 40 | 12.43 | ES- | 2 |
| 254 | PA 14:1-20:4 | 665.4 | 20 | 225.3 | 40 | 12.43 | ES- | 1 |
| 255 | PA 14:1-20:4 | 665.4 | 20 | 303.2 | 40 | 12.43 | ES- | 2 |
| 256 | PA 14:1-20:5 | 663.4 | 20 | 225.3 | 40 | 12.43 | ES- | 1 |
| 257 | PA 14:1-20:5 | 663.4 | 20 | 301.2 | 40 | 12.43 | ES- | 2 |
| 258 | PA 14:1-22:0 | 701.5 | 20 | 225.3 | 40 | 12.43 | ES- | 1 |
| 259 | PA 14:1-22:0 | 701.5 | 20 | 339.2 | 40 | 12.43 | ES- | 2 |
| 260 | PA 14:1-22:1 | 699.5 | 20 | 225.3 | 40 | 12.43 | ES- | 1 |
| 261 | PA 14:1-22:1 | 699.5 | 20 | 337.2 | 40 | 12.43 | ES- | 2 |
| 262 | PA 14:1-22:2 | 697.5 | 20 | 225.3 | 40 | 12.43 | ES- | 1 |
| 263 | PA 14:1-22:2 | 697.5 | 20 | 335.2 | 40 | 12.43 | ES- | 2 |
| 264 | PA 14:1-22:3 | 695.5 | 20 | 225.3 | 40 | 12.43 | ES- | 1 |
| 265 | PA 14:1-22:3 | 695.5 | 20 | 333.2 | 40 | 12.43 | ES- | 2 |
| 266 | PA 14:1-22:4 | 693.5 | 20 | 225.3 | 40 | 12.43 | ES- | 1 |
| 267 | PA 14:1-22:4 | 693.5 | 20 | 331.2 | 40 | 12.43 | ES- | 2 |
| 268 | PA 14:1-22:5 | 691.4 | 20 | 225.3 | 40 | 12.43 | ES- | 1 |
| 269 | PA 14:1-22:5 | 691.4 | 20 | 329.2 | 40 | 12.43 | ES- | 2 |
| 270 | PA 14:1-22:6 | 689.4 | 20 | 225.3 | 40 | 12.43 | ES- | 1 |
| 271 | PA 14:1-22:6 | 689.4 | 20 | 327.2 | 40 | 12.43 | ES- | 2 |
| 272 | PA 16:0-16:0 | 647.5 | 20 | 255.3 | 40 | 12.43 | ES- | 1 |
| 273 | PA 16:0-16:1 | 645.5 | 20 | 253.3 | 40 | 12.43 | ES- | 1 |
| 274 | PA 16:0-16:1 | 645.5 | 20 | 255.3 | 40 | 12.43 | ES- | 2 |
| 275 | PA 16:0-18:0 | 675.5 | 20 | 255.3 | 40 | 12.43 | ES- | 1 |
| 276 | PA 16:0-18:0 | 675.5 | 20 | 283.3 | 40 | 12.43 | ES- | 2 |
| 277 | PA 16:0-18:1 | 673.5 | 20 | 255.3 | 40 | 12.43 | ES- | 1 |

|     |              |       |    |       |    |       |     |   |
|-----|--------------|-------|----|-------|----|-------|-----|---|
| 278 | PA 16:0-18:1 | 673.5 | 20 | 281.3 | 40 | 12.43 | ES- | 2 |
| 279 | PA 16:0-18:2 | 671.5 | 20 | 255.3 | 40 | 12.43 | ES- | 1 |
| 280 | PA 16:0-18:2 | 671.5 | 20 | 279.3 | 40 | 12.43 | ES- | 2 |
| 281 | PA 16:0-18:3 | 669.5 | 20 | 255.3 | 40 | 12.43 | ES- | 1 |
| 282 | PA 16:0-18:3 | 669.5 | 20 | 277.3 | 40 | 12.43 | ES- | 2 |
| 283 | PA 16:0-18:4 | 667.4 | 20 | 255.3 | 40 | 12.43 | ES- | 1 |
| 284 | PA 16:0-18:4 | 667.4 | 20 | 275.3 | 40 | 12.43 | ES- | 2 |

Method 2: DAG and PA (2)

| No | Name          | Precursor | CV (V) | Product | CE (V) | RT setting (min) | IonMode | Ion |
|----|---------------|-----------|--------|---------|--------|------------------|---------|-----|
| 1  | DAG 16:0-20:0 | 642.6     | 50     | 313.3   | 20     | 3.25             | ES+     | 1   |
| 2  | DAG 16:0-20:0 | 642.6     | 50     | 369.4   | 20     | 3.25             | ES+     | 2   |
| 3  | DAG 16:0-20:1 | 640.6     | 50     | 313.3   | 20     | 3.25             | ES+     | 1   |
| 4  | DAG 16:0-20:1 | 640.6     | 50     | 367.3   | 20     | 3.25             | ES+     | 2   |
| 5  | DAG 16:0-20:2 | 638.6     | 50     | 313.3   | 20     | 3.25             | ES+     | 1   |
| 6  | DAG 16:0-20:2 | 638.6     | 50     | 365.3   | 20     | 3.25             | ES+     | 2   |
| 7  | DAG 16:0-20:3 | 636.6     | 50     | 313.3   | 20     | 3.25             | ES+     | 1   |
| 8  | DAG 16:0-20:3 | 636.6     | 50     | 363.3   | 20     | 3.25             | ES+     | 2   |
| 9  | DAG 16:0-20:4 | 634.5     | 50     | 313.3   | 20     | 3.25             | ES+     | 1   |
| 10 | DAG 16:0-20:4 | 634.5     | 50     | 361.3   | 20     | 3.25             | ES+     | 2   |
| 11 | DAG 16:0-20:5 | 632.5     | 50     | 313.3   | 20     | 3.25             | ES+     | 1   |
| 12 | DAG 16:0-20:5 | 632.5     | 50     | 359.3   | 20     | 3.25             | ES+     | 2   |
| 13 | DAG 16:0-22:0 | 670.6     | 50     | 313.3   | 20     | 3.25             | ES+     | 1   |
| 14 | DAG 16:0-22:0 | 670.6     | 50     | 397.4   | 20     | 3.25             | ES+     | 2   |
| 15 | DAG 16:0-22:1 | 668.6     | 50     | 313.3   | 20     | 3.25             | ES+     | 1   |
| 16 | DAG 16:0-22:1 | 668.6     | 50     | 395.4   | 20     | 3.25             | ES+     | 2   |
| 17 | DAG 16:0-22:2 | 666.6     | 50     | 313.3   | 20     | 3.25             | ES+     | 1   |
| 18 | DAG 16:0-22:2 | 666.6     | 50     | 393.4   | 20     | 3.25             | ES+     | 2   |
| 19 | DAG 16:0-22:3 | 664.6     | 50     | 313.3   | 20     | 3.25             | ES+     | 1   |
| 20 | DAG 16:0-22:3 | 664.6     | 50     | 391.3   | 20     | 3.25             | ES+     | 2   |
| 21 | DAG 16:0-22:4 | 662.6     | 50     | 313.3   | 20     | 3.25             | ES+     | 1   |
| 22 | DAG 16:0-22:4 | 662.6     | 50     | 389.3   | 20     | 3.25             | ES+     | 2   |
| 23 | DAG 16:0-22:5 | 660.6     | 50     | 313.3   | 20     | 3.25             | ES+     | 1   |
| 24 | DAG 16:0-22:5 | 660.6     | 50     | 387.3   | 20     | 3.25             | ES+     | 2   |
| 25 | DAG 16:0-22:6 | 658.5     | 50     | 313.3   | 20     | 3.25             | ES+     | 1   |
| 26 | DAG 16:0-22:6 | 658.5     | 50     | 385.3   | 20     | 3.25             | ES+     | 2   |

|    |               |       |    |       |    |      |     |   |
|----|---------------|-------|----|-------|----|------|-----|---|
| 27 | DAG 16:1-16:1 | 582.5 | 50 | 311.3 | 20 | 3.25 | ES+ | 1 |
| 28 | DAG 16:1-18:0 | 612.6 | 50 | 311.3 | 20 | 3.25 | ES+ | 1 |
| 29 | DAG 16:1-18:0 | 612.6 | 50 | 341.3 | 20 | 3.25 | ES+ | 2 |
| 30 | DAG 16:1-18:1 | 610.5 | 50 | 311.3 | 20 | 3.25 | ES+ | 1 |
| 31 | DAG 16:1-18:1 | 610.5 | 50 | 339.3 | 20 | 3.25 | ES+ | 2 |
| 32 | DAG 16:1-18:2 | 608.5 | 50 | 311.3 | 20 | 3.25 | ES+ | 1 |
| 33 | DAG 16:1-18:2 | 608.5 | 50 | 337.3 | 20 | 3.25 | ES+ | 2 |
| 34 | DAG 16:1-18:3 | 606.5 | 50 | 311.3 | 20 | 3.25 | ES+ | 1 |
| 35 | DAG 16:1-18:3 | 606.5 | 50 | 335.3 | 20 | 3.25 | ES+ | 2 |
| 36 | DAG 16:1-18:4 | 604.5 | 50 | 311.3 | 20 | 3.25 | ES+ | 1 |
| 37 | DAG 16:1-18:4 | 604.5 | 50 | 333.3 | 20 | 3.25 | ES+ | 2 |
| 38 | DAG 16:1-20:0 | 640.6 | 50 | 311.3 | 20 | 3.25 | ES+ | 1 |
| 39 | DAG 16:1-20:0 | 640.6 | 50 | 369.4 | 20 | 3.25 | ES+ | 2 |
| 40 | DAG 16:1-20:1 | 638.6 | 50 | 311.3 | 20 | 3.25 | ES+ | 1 |
| 41 | DAG 16:1-20:1 | 638.6 | 50 | 367.3 | 20 | 3.25 | ES+ | 2 |
| 42 | DAG 16:1-20:2 | 636.6 | 50 | 311.3 | 20 | 3.25 | ES+ | 1 |
| 43 | DAG 16:1-20:2 | 636.6 | 50 | 365.3 | 20 | 3.25 | ES+ | 2 |
| 44 | DAG 16:1-20:3 | 634.5 | 50 | 311.3 | 20 | 3.25 | ES+ | 1 |
| 45 | DAG 16:1-20:3 | 634.5 | 50 | 363.3 | 20 | 3.25 | ES+ | 2 |
| 46 | DAG 16:1-20:4 | 632.5 | 50 | 311.3 | 20 | 3.25 | ES+ | 1 |
| 47 | DAG 16:1-20:4 | 632.5 | 50 | 361.3 | 20 | 3.25 | ES+ | 2 |
| 48 | DAG 16:1-20:5 | 630.5 | 50 | 311.3 | 20 | 3.25 | ES+ | 1 |
| 49 | DAG 16:1-20:5 | 630.5 | 50 | 359.3 | 20 | 3.25 | ES+ | 2 |
| 50 | DAG 16:1-22:0 | 668.6 | 50 | 311.3 | 20 | 3.25 | ES+ | 1 |
| 51 | DAG 16:1-22:0 | 668.6 | 50 | 397.4 | 20 | 3.25 | ES+ | 2 |
| 52 | DAG 16:1-22:1 | 666.6 | 50 | 311.3 | 20 | 3.25 | ES+ | 1 |
| 53 | DAG 16:1-22:1 | 666.6 | 50 | 395.4 | 20 | 3.25 | ES+ | 2 |
| 54 | DAG 16:1-22:2 | 664.6 | 50 | 311.3 | 20 | 3.25 | ES+ | 1 |
| 55 | DAG 16:1-22:2 | 664.6 | 50 | 393.4 | 20 | 3.25 | ES+ | 2 |
| 56 | DAG 16:1-22:3 | 662.6 | 50 | 311.3 | 20 | 3.25 | ES+ | 1 |
| 57 | DAG 16:1-22:3 | 662.6 | 50 | 391.3 | 20 | 3.25 | ES+ | 2 |
| 58 | DAG 16:1-22:4 | 660.6 | 50 | 311.3 | 20 | 3.25 | ES+ | 1 |
| 59 | DAG 16:1-22:4 | 660.6 | 50 | 389.3 | 20 | 3.25 | ES+ | 2 |
| 60 | DAG 16:1-22:5 | 658.5 | 50 | 311.3 | 20 | 3.25 | ES+ | 1 |
| 61 | DAG 16:1-22:5 | 658.5 | 50 | 387.3 | 20 | 3.25 | ES+ | 2 |

|    |               |       |    |       |    |      |     |   |
|----|---------------|-------|----|-------|----|------|-----|---|
| 62 | DAG 16:1-22:6 | 656.5 | 50 | 311.3 | 20 | 3.25 | ES+ | 1 |
| 63 | DAG 16:1-22:6 | 656.5 | 50 | 385.3 | 20 | 3.25 | ES+ | 2 |
| 64 | DAG 18:0-18:0 | 642.6 | 50 | 341.3 | 20 | 3.25 | ES+ | 1 |
| 65 | DAG 18:0-18:1 | 640.6 | 50 | 339.3 | 20 | 3.25 | ES+ | 1 |
| 66 | DAG 18:0-18:1 | 640.6 | 50 | 341.3 | 20 | 3.25 | ES+ | 2 |
| 67 | DAG 18:0-18:2 | 638.6 | 50 | 337.3 | 20 | 3.25 | ES+ | 1 |
| 68 | DAG 18:0-18:2 | 638.6 | 50 | 341.3 | 20 | 3.25 | ES+ | 2 |
| 69 | DAG 18:0-18:3 | 636.6 | 50 | 335.3 | 20 | 3.25 | ES+ | 1 |
| 70 | DAG 18:0-18:3 | 636.6 | 50 | 341.3 | 20 | 3.25 | ES+ | 2 |
| 71 | DAG 18:0-18:4 | 634.5 | 50 | 333.3 | 20 | 3.25 | ES+ | 1 |
| 72 | DAG 18:0-18:4 | 634.5 | 50 | 341.3 | 20 | 3.25 | ES+ | 2 |
| 73 | DAG 18:0-20:0 | 670.6 | 50 | 341.3 | 20 | 3.25 | ES+ | 1 |
| 74 | DAG 18:0-20:0 | 670.6 | 50 | 369.4 | 20 | 3.25 | ES+ | 2 |
| 75 | DAG 18:0-20:1 | 668.6 | 50 | 341.3 | 20 | 3.25 | ES+ | 1 |
| 76 | DAG 18:0-20:1 | 668.6 | 50 | 367.3 | 20 | 3.25 | ES+ | 2 |
| 77 | DAG 18:0-20:2 | 666.6 | 50 | 341.3 | 20 | 3.25 | ES+ | 1 |
| 78 | DAG 18:0-20:2 | 666.6 | 50 | 365.3 | 20 | 3.25 | ES+ | 2 |
| 79 | DAG 18:0-20:3 | 664.6 | 50 | 341.3 | 20 | 3.25 | ES+ | 1 |
| 80 | DAG 18:0-20:3 | 664.6 | 50 | 363.3 | 20 | 3.25 | ES+ | 2 |
| 81 | DAG 18:0-20:4 | 662.6 | 50 | 341.3 | 20 | 3.25 | ES+ | 1 |
| 82 | DAG 18:0-20:4 | 662.6 | 50 | 361.3 | 20 | 3.25 | ES+ | 2 |
| 83 | DAG 18:0-20:5 | 660.6 | 50 | 341.3 | 20 | 3.25 | ES+ | 1 |
| 84 | DAG 18:0-20:5 | 660.6 | 50 | 359.3 | 20 | 3.25 | ES+ | 2 |
| 85 | DAG 18:0-22:0 | 698.7 | 50 | 341.3 | 20 | 3.25 | ES+ | 1 |
| 86 | DAG 18:0-22:0 | 698.7 | 50 | 397.4 | 20 | 3.25 | ES+ | 2 |
| 87 | DAG 18:0-22:1 | 696.7 | 50 | 341.3 | 20 | 3.25 | ES+ | 1 |
| 88 | DAG 18:0-22:1 | 696.7 | 50 | 395.4 | 20 | 3.25 | ES+ | 2 |
| 89 | DAG 18:0-22:2 | 694.6 | 50 | 341.3 | 20 | 3.25 | ES+ | 1 |
| 90 | DAG 18:0-22:2 | 694.6 | 50 | 393.4 | 20 | 3.25 | ES+ | 2 |
| 91 | DAG 18:0-22:3 | 692.6 | 50 | 341.3 | 20 | 3.25 | ES+ | 1 |
| 92 | DAG 18:0-22:3 | 692.6 | 50 | 391.3 | 20 | 3.25 | ES+ | 2 |
| 93 | DAG 18:0-22:4 | 690.6 | 50 | 341.3 | 20 | 3.25 | ES+ | 1 |
| 94 | DAG 18:0-22:4 | 690.6 | 50 | 389.3 | 20 | 3.25 | ES+ | 2 |
| 95 | DAG 18:0-22:5 | 688.6 | 50 | 341.3 | 20 | 3.25 | ES+ | 1 |
| 96 | DAG 18:0-22:5 | 688.6 | 50 | 387.3 | 20 | 3.25 | ES+ | 2 |

|     |               |       |    |       |    |      |     |   |
|-----|---------------|-------|----|-------|----|------|-----|---|
| 97  | DAG 18:0-22:6 | 686.6 | 50 | 341.3 | 20 | 3.25 | ES+ | 1 |
| 98  | DAG 18:0-22:6 | 686.6 | 50 | 385.3 | 20 | 3.25 | ES+ | 2 |
| 99  | DAG 18:1-18:1 | 638.6 | 50 | 339.3 | 20 | 3.25 | ES+ | 1 |
| 100 | DAG 18:1-18:2 | 636.6 | 50 | 337.3 | 20 | 3.25 | ES+ | 1 |
| 101 | DAG 18:1-18:2 | 636.6 | 50 | 339.3 | 20 | 3.25 | ES+ | 2 |
| 102 | DAG 18:1-18:3 | 634.5 | 50 | 335.3 | 20 | 3.25 | ES+ | 1 |
| 103 | DAG 18:1-18:3 | 634.5 | 50 | 339.3 | 20 | 3.25 | ES+ | 2 |
| 104 | DAG 18:1-18:4 | 632.5 | 50 | 333.3 | 20 | 3.25 | ES+ | 1 |
| 105 | DAG 18:1-18:4 | 632.5 | 50 | 339.3 | 20 | 3.25 | ES+ | 2 |
| 106 | DAG 18:1-20:0 | 668.6 | 50 | 339.3 | 20 | 3.25 | ES+ | 1 |
| 107 | DAG 18:1-20:0 | 668.6 | 50 | 369.4 | 20 | 3.25 | ES+ | 2 |
| 108 | DAG 18:1-20:1 | 666.6 | 50 | 339.3 | 20 | 3.25 | ES+ | 1 |
| 109 | DAG 18:1-20:1 | 666.6 | 50 | 367.3 | 20 | 3.25 | ES+ | 2 |
| 110 | DAG 18:1-20:2 | 664.6 | 50 | 339.3 | 20 | 3.25 | ES+ | 1 |
| 111 | DAG 18:1-20:2 | 664.6 | 50 | 365.3 | 20 | 3.25 | ES+ | 2 |
| 112 | DAG 18:1-20:3 | 662.6 | 50 | 339.3 | 20 | 3.25 | ES+ | 1 |
| 113 | DAG 18:1-20:3 | 662.6 | 50 | 363.3 | 20 | 3.25 | ES+ | 2 |
| 114 | DAG 18:1-20:4 | 660.6 | 50 | 339.3 | 20 | 3.25 | ES+ | 1 |
| 115 | DAG 18:1-20:4 | 660.6 | 50 | 361.3 | 20 | 3.25 | ES+ | 2 |
| 116 | DAG 18:1-20:5 | 658.5 | 50 | 339.3 | 20 | 3.25 | ES+ | 1 |
| 117 | DAG 18:1-20:5 | 658.5 | 50 | 359.3 | 20 | 3.25 | ES+ | 2 |
| 118 | DAG 18:1-22:0 | 696.7 | 50 | 339.3 | 20 | 3.25 | ES+ | 1 |
| 119 | DAG 18:1-22:0 | 696.7 | 50 | 397.4 | 20 | 3.25 | ES+ | 2 |
| 120 | DAG 18:1-22:1 | 694.6 | 50 | 339.3 | 20 | 3.25 | ES+ | 1 |
| 121 | DAG 18:1-22:1 | 694.6 | 50 | 395.4 | 20 | 3.25 | ES+ | 2 |
| 122 | DAG 18:1-22:2 | 692.6 | 50 | 339.3 | 20 | 3.25 | ES+ | 1 |
| 123 | DAG 18:1-22:2 | 692.6 | 50 | 393.4 | 20 | 3.25 | ES+ | 2 |
| 124 | DAG 18:1-22:3 | 690.6 | 50 | 339.3 | 20 | 3.25 | ES+ | 1 |
| 125 | DAG 18:1-22:3 | 690.6 | 50 | 391.3 | 20 | 3.25 | ES+ | 2 |
| 126 | DAG 18:1-22:4 | 688.6 | 50 | 339.3 | 20 | 3.25 | ES+ | 1 |
| 127 | DAG 18:1-22:4 | 688.6 | 50 | 389.3 | 20 | 3.25 | ES+ | 2 |
| 128 | DAG 18:1-22:5 | 686.6 | 50 | 339.3 | 20 | 3.25 | ES+ | 1 |
| 129 | DAG 18:1-22:5 | 686.6 | 50 | 387.3 | 20 | 3.25 | ES+ | 2 |
| 130 | DAG 18:1-22:6 | 684.6 | 50 | 339.3 | 20 | 3.25 | ES+ | 1 |
| 131 | DAG 18:1-22:6 | 684.6 | 50 | 385.3 | 20 | 3.25 | ES+ | 2 |



|     |               |       |    |       |    |       |     |   |
|-----|---------------|-------|----|-------|----|-------|-----|---|
| 132 | DAG 18:2-18:2 | 634.5 | 50 | 337.3 | 20 | 3.25  | ES+ | 1 |
| 133 | DAG 18:2-18:3 | 632.5 | 50 | 335.3 | 20 | 3.25  | ES+ | 1 |
| 134 | DAG 18:2-18:3 | 632.5 | 50 | 337.3 | 20 | 3.25  | ES+ | 2 |
| 135 | DAG 18:2-18:4 | 630.5 | 50 | 333.3 | 20 | 3.25  | ES+ | 1 |
| 136 | DAG 18:2-18:4 | 630.5 | 50 | 337.3 | 20 | 3.25  | ES+ | 2 |
| 137 | DAG 18:2-20:0 | 666.6 | 50 | 337.3 | 20 | 3.25  | ES+ | 1 |
| 138 | DAG 18:2-20:0 | 666.6 | 50 | 369.4 | 20 | 3.25  | ES+ | 2 |
| 139 | DAG 18:2-20:1 | 664.6 | 50 | 337.3 | 20 | 3.25  | ES+ | 1 |
| 140 | DAG 18:2-20:1 | 664.6 | 50 | 367.3 | 20 | 3.25  | ES+ | 2 |
| 141 | DAG 18:2-20:2 | 662.6 | 50 | 337.3 | 20 | 3.25  | ES+ | 1 |
| 142 | DAG 18:2-20:2 | 662.6 | 50 | 365.3 | 20 | 3.25  | ES+ | 2 |
| 143 | DAG 18:2-20:3 | 660.6 | 50 | 337.3 | 20 | 3.25  | ES+ | 1 |
| 144 | DAG 18:2-20:3 | 660.6 | 50 | 363.3 | 20 | 3.25  | ES+ | 2 |
| 145 | DAG 18:2-20:4 | 658.5 | 50 | 337.3 | 20 | 3.25  | ES+ | 1 |
| 146 | DAG 18:2-20:4 | 658.5 | 50 | 361.3 | 20 | 3.25  | ES+ | 2 |
| 147 | DAG 18:2-20:5 | 656.5 | 50 | 337.3 | 20 | 3.25  | ES+ | 1 |
| 148 | DAG 18:2-20:5 | 656.5 | 50 | 359.3 | 20 | 3.25  | ES+ | 2 |
| 149 | PA 16:0-20:0  | 703.5 | 20 | 255.3 | 40 | 12.43 | ES- | 1 |
| 150 | PA 16:0-20:0  | 703.5 | 20 | 311.2 | 40 | 12.43 | ES- | 2 |
| 151 | PA 16:0-20:1  | 701.5 | 20 | 255.3 | 40 | 12.43 | ES- | 1 |
| 152 | PA 16:0-20:1  | 701.5 | 20 | 309.2 | 40 | 12.43 | ES- | 2 |
| 153 | PA 16:0-20:2  | 699.5 | 20 | 255.3 | 40 | 12.43 | ES- | 1 |
| 154 | PA 16:0-20:2  | 699.5 | 20 | 307.2 | 40 | 12.43 | ES- | 2 |
| 155 | PA 16:0-20:3  | 697.5 | 20 | 255.3 | 40 | 12.43 | ES- | 1 |
| 156 | PA 16:0-20:3  | 697.5 | 20 | 305.2 | 40 | 12.43 | ES- | 2 |
| 157 | PA 16:0-20:4  | 695.5 | 20 | 255.3 | 40 | 12.43 | ES- | 1 |
| 158 | PA 16:0-20:4  | 695.5 | 20 | 303.2 | 40 | 12.43 | ES- | 2 |
| 159 | PA 16:0-20:5  | 693.5 | 20 | 255.3 | 40 | 12.43 | ES- | 1 |
| 160 | PA 16:0-20:5  | 693.5 | 20 | 301.2 | 40 | 12.43 | ES- | 2 |
| 161 | PA 16:0-22:0  | 731.6 | 20 | 255.3 | 40 | 12.43 | ES- | 1 |
| 162 | PA 16:0-22:0  | 731.6 | 20 | 339.2 | 40 | 12.43 | ES- | 2 |
| 163 | PA 16:0-22:1  | 729.5 | 20 | 255.3 | 40 | 12.43 | ES- | 1 |
| 164 | PA 16:0-22:1  | 729.5 | 20 | 337.2 | 40 | 12.43 | ES- | 2 |
| 165 | PA 16:0-22:2  | 727.5 | 20 | 255.3 | 40 | 12.43 | ES- | 1 |
| 166 | PA 16:0-22:2  | 727.5 | 20 | 335.2 | 40 | 12.43 | ES- | 2 |

|     |              |       |    |       |    |       |     |   |
|-----|--------------|-------|----|-------|----|-------|-----|---|
| 167 | PA 16:0-22:3 | 725.5 | 20 | 255.3 | 40 | 12.43 | ES- | 1 |
| 168 | PA 16:0-22:3 | 725.5 | 20 | 333.2 | 40 | 12.43 | ES- | 2 |
| 169 | PA 16:0-22:4 | 723.5 | 20 | 255.3 | 40 | 12.43 | ES- | 1 |
| 170 | PA 16:0-22:4 | 723.5 | 20 | 331.2 | 40 | 12.43 | ES- | 2 |
| 171 | PA 16:0-22:5 | 721.5 | 20 | 255.3 | 40 | 12.43 | ES- | 1 |
| 172 | PA 16:0-22:5 | 721.5 | 20 | 329.2 | 40 | 12.43 | ES- | 2 |
| 173 | PA 16:0-22:6 | 719.5 | 20 | 255.3 | 40 | 12.43 | ES- | 1 |
| 174 | PA 16:0-22:6 | 719.5 | 20 | 327.2 | 40 | 12.43 | ES- | 2 |
| 175 | PA 16:1-16:1 | 643.4 | 20 | 253.3 | 40 | 12.43 | ES- | 1 |
| 176 | PA 16:1-18:0 | 673.5 | 20 | 253.3 | 40 | 12.43 | ES- | 1 |
| 177 | PA 16:1-18:0 | 673.5 | 20 | 283.3 | 40 | 12.43 | ES- | 2 |
| 178 | PA 16:1-18:1 | 671.5 | 20 | 253.3 | 40 | 12.43 | ES- | 1 |
| 179 | PA 16:1-18:1 | 671.5 | 20 | 281.3 | 40 | 12.43 | ES- | 2 |
| 180 | PA 16:1-18:2 | 669.5 | 20 | 253.3 | 40 | 12.43 | ES- | 1 |
| 181 | PA 16:1-18:2 | 669.5 | 20 | 279.3 | 40 | 12.43 | ES- | 2 |
| 182 | PA 16:1-18:3 | 667.4 | 20 | 253.3 | 40 | 12.43 | ES- | 1 |
| 183 | PA 16:1-18:3 | 667.4 | 20 | 277.3 | 40 | 12.43 | ES- | 2 |
| 184 | PA 16:1-18:4 | 665.4 | 20 | 253.3 | 40 | 12.43 | ES- | 1 |
| 185 | PA 16:1-18:4 | 665.4 | 20 | 275.3 | 40 | 12.43 | ES- | 2 |
| 186 | PA 16:1-20:0 | 701.5 | 20 | 253.3 | 40 | 12.43 | ES- | 1 |
| 187 | PA 16:1-20:0 | 701.5 | 20 | 311.2 | 40 | 12.43 | ES- | 2 |
| 188 | PA 16:1-20:1 | 699.5 | 20 | 253.3 | 40 | 12.43 | ES- | 1 |
| 189 | PA 16:1-20:1 | 699.5 | 20 | 309.2 | 40 | 12.43 | ES- | 2 |
| 190 | PA 16:1-20:2 | 697.5 | 20 | 253.3 | 40 | 12.43 | ES- | 1 |
| 191 | PA 16:1-20:2 | 697.5 | 20 | 307.2 | 40 | 12.43 | ES- | 2 |
| 192 | PA 16:1-20:3 | 695.5 | 20 | 253.3 | 40 | 12.43 | ES- | 1 |
| 193 | PA 16:1-20:3 | 695.5 | 20 | 305.2 | 40 | 12.43 | ES- | 2 |
| 194 | PA 16:1-20:4 | 693.5 | 20 | 253.3 | 40 | 12.43 | ES- | 1 |
| 195 | PA 16:1-20:4 | 693.5 | 20 | 303.2 | 40 | 12.43 | ES- | 2 |
| 196 | PA 16:1-20:5 | 691.4 | 20 | 253.3 | 40 | 12.43 | ES- | 1 |
| 197 | PA 16:1-20:5 | 691.4 | 20 | 301.2 | 40 | 12.43 | ES- | 2 |
| 198 | PA 16:1-22:0 | 729.5 | 20 | 253.3 | 40 | 12.43 | ES- | 1 |
| 199 | PA 16:1-22:0 | 729.5 | 20 | 339.2 | 40 | 12.43 | ES- | 2 |
| 200 | PA 16:1-22:1 | 727.5 | 20 | 253.3 | 40 | 12.43 | ES- | 1 |
| 201 | PA 16:1-22:1 | 727.5 | 20 | 337.2 | 40 | 12.43 | ES- | 2 |

|     |              |       |    |       |    |       |     |   |
|-----|--------------|-------|----|-------|----|-------|-----|---|
| 202 | PA 16:1-22:2 | 725.5 | 20 | 253.3 | 40 | 12.43 | ES- | 1 |
| 203 | PA 16:1-22:2 | 725.5 | 20 | 335.2 | 40 | 12.43 | ES- | 2 |
| 204 | PA 16:1-22:3 | 723.5 | 20 | 253.3 | 40 | 12.43 | ES- | 1 |
| 205 | PA 16:1-22:3 | 723.5 | 20 | 333.2 | 40 | 12.43 | ES- | 2 |
| 206 | PA 16:1-22:4 | 721.5 | 20 | 253.3 | 40 | 12.43 | ES- | 1 |
| 207 | PA 16:1-22:4 | 721.5 | 20 | 331.2 | 40 | 12.43 | ES- | 2 |
| 208 | PA 16:1-22:5 | 719.5 | 20 | 253.3 | 40 | 12.43 | ES- | 1 |
| 209 | PA 16:1-22:5 | 719.5 | 20 | 329.2 | 40 | 12.43 | ES- | 2 |
| 210 | PA 16:1-22:6 | 717.5 | 20 | 253.3 | 40 | 12.43 | ES- | 1 |
| 211 | PA 16:1-22:6 | 717.5 | 20 | 327.2 | 40 | 12.43 | ES- | 2 |
| 212 | PA 17:0-17:0 | 675.5 | 20 | 269.3 | 40 | 12.43 | ES- | 1 |
| 213 | PA 18:0-18:0 | 703.5 | 20 | 283.3 | 40 | 12.43 | ES- | 1 |
| 214 | PA 18:0-18:1 | 701.5 | 20 | 281.3 | 40 | 12.43 | ES- | 1 |
| 215 | PA 18:0-18:1 | 701.5 | 20 | 283.3 | 40 | 12.43 | ES- | 2 |
| 216 | PA 18:0-18:2 | 699.5 | 20 | 279.3 | 40 | 12.43 | ES- | 1 |
| 217 | PA 18:0-18:2 | 699.5 | 20 | 283.3 | 40 | 12.43 | ES- | 2 |
| 218 | PA 18:0-18:3 | 697.5 | 20 | 277.3 | 40 | 12.43 | ES- | 1 |
| 219 | PA 18:0-18:3 | 697.5 | 20 | 283.3 | 40 | 12.43 | ES- | 2 |
| 220 | PA 18:0-18:4 | 695.5 | 20 | 275.3 | 40 | 12.43 | ES- | 1 |
| 221 | PA 18:0-18:4 | 695.5 | 20 | 283.3 | 40 | 12.43 | ES- | 2 |
| 222 | PA 18:0-20:0 | 731.6 | 20 | 283.3 | 40 | 12.43 | ES- | 1 |
| 223 | PA 18:0-20:0 | 731.6 | 20 | 311.2 | 40 | 12.43 | ES- | 2 |
| 224 | PA 18:0-20:1 | 729.5 | 20 | 283.3 | 40 | 12.43 | ES- | 1 |
| 225 | PA 18:0-20:1 | 729.5 | 20 | 309.2 | 40 | 12.43 | ES- | 2 |
| 226 | PA 18:0-20:2 | 727.5 | 20 | 283.3 | 40 | 12.43 | ES- | 1 |
| 227 | PA 18:0-20:2 | 727.5 | 20 | 307.2 | 40 | 12.43 | ES- | 2 |
| 228 | PA 18:0-20:3 | 725.5 | 20 | 283.3 | 40 | 12.43 | ES- | 1 |
| 229 | PA 18:0-20:3 | 725.5 | 20 | 305.2 | 40 | 12.43 | ES- | 2 |
| 230 | PA 18:0-20:4 | 723.5 | 20 | 283.3 | 40 | 12.43 | ES- | 1 |
| 231 | PA 18:0-20:4 | 723.5 | 20 | 303.2 | 40 | 12.43 | ES- | 2 |
| 232 | PA 18:0-20:5 | 721.5 | 20 | 283.3 | 40 | 12.43 | ES- | 1 |
| 233 | PA 18:0-20:5 | 721.5 | 20 | 301.2 | 40 | 12.43 | ES- | 2 |
| 234 | PA 18:0-22:0 | 759.6 | 20 | 283.3 | 40 | 12.43 | ES- | 1 |
| 235 | PA 18:0-22:0 | 759.6 | 20 | 339.2 | 40 | 12.43 | ES- | 2 |
| 236 | PA 18:0-22:1 | 757.6 | 20 | 283.3 | 40 | 12.43 | ES- | 1 |

|     |              |       |    |       |    |       |     |   |
|-----|--------------|-------|----|-------|----|-------|-----|---|
| 237 | PA 18:0-22:1 | 757.6 | 20 | 337.2 | 40 | 12.43 | ES- | 2 |
| 238 | PA 18:0-22:2 | 755.6 | 20 | 283.3 | 40 | 12.43 | ES- | 1 |
| 239 | PA 18:0-22:2 | 755.6 | 20 | 335.2 | 40 | 12.43 | ES- | 2 |
| 240 | PA 18:0-22:3 | 753.5 | 20 | 283.3 | 40 | 12.43 | ES- | 1 |
| 241 | PA 18:0-22:3 | 753.5 | 20 | 333.2 | 40 | 12.43 | ES- | 2 |
| 242 | PA 18:0-22:4 | 751.5 | 20 | 283.3 | 40 | 12.43 | ES- | 1 |
| 243 | PA 18:0-22:4 | 751.5 | 20 | 331.2 | 40 | 12.43 | ES- | 2 |
| 244 | PA 18:0-22:5 | 749.5 | 20 | 283.3 | 40 | 12.43 | ES- | 1 |
| 245 | PA 18:0-22:5 | 749.5 | 20 | 329.2 | 40 | 12.43 | ES- | 2 |
| 246 | PA 18:0-22:6 | 747.5 | 20 | 283.3 | 40 | 12.43 | ES- | 1 |
| 247 | PA 18:0-22:6 | 747.5 | 20 | 327.2 | 40 | 12.43 | ES- | 2 |
| 248 | PA 18:1-18:1 | 699.5 | 20 | 281.3 | 40 | 12.43 | ES- | 1 |
| 249 | PA 18:1-18:2 | 697.5 | 20 | 279.3 | 40 | 12.43 | ES- | 1 |
| 250 | PA 18:1-18:2 | 697.5 | 20 | 281.3 | 40 | 12.43 | ES- | 2 |
| 251 | PA 18:1-18:3 | 695.5 | 20 | 277.3 | 40 | 12.43 | ES- | 1 |
| 252 | PA 18:1-18:3 | 695.5 | 20 | 281.3 | 40 | 12.43 | ES- | 2 |
| 253 | PA 18:1-18:4 | 693.5 | 20 | 275.3 | 40 | 12.43 | ES- | 1 |
| 254 | PA 18:1-18:4 | 693.5 | 20 | 281.3 | 40 | 12.43 | ES- | 2 |
| 255 | PA 18:1-20:0 | 729.5 | 20 | 281.3 | 40 | 12.43 | ES- | 1 |
| 256 | PA 18:1-20:0 | 729.5 | 20 | 311.2 | 40 | 12.43 | ES- | 2 |
| 257 | PA 18:1-20:1 | 727.5 | 20 | 281.3 | 40 | 12.43 | ES- | 1 |
| 258 | PA 18:1-20:1 | 727.5 | 20 | 309.2 | 40 | 12.43 | ES- | 2 |
| 259 | PA 18:1-20:2 | 725.5 | 20 | 281.3 | 40 | 12.43 | ES- | 1 |
| 260 | PA 18:1-20:2 | 725.5 | 20 | 307.2 | 40 | 12.43 | ES- | 2 |
| 261 | PA 18:1-20:3 | 723.5 | 20 | 281.3 | 40 | 12.43 | ES- | 1 |
| 262 | PA 18:1-20:3 | 723.5 | 20 | 305.2 | 40 | 12.43 | ES- | 2 |
| 263 | PA 18:1-20:4 | 721.5 | 20 | 281.3 | 40 | 12.43 | ES- | 1 |
| 264 | PA 18:1-20:4 | 721.5 | 20 | 303.2 | 40 | 12.43 | ES- | 2 |
| 265 | PA 18:1-20:5 | 719.5 | 20 | 281.3 | 40 | 12.43 | ES- | 1 |
| 266 | PA 18:1-20:5 | 719.5 | 20 | 301.2 | 40 | 12.43 | ES- | 2 |
| 267 | PA 18:1-22:0 | 757.6 | 20 | 281.3 | 40 | 12.43 | ES- | 1 |
| 268 | PA 18:1-22:0 | 757.6 | 20 | 339.2 | 40 | 12.43 | ES- | 2 |
| 269 | PA 18:1-22:1 | 755.6 | 20 | 281.3 | 40 | 12.43 | ES- | 1 |
| 270 | PA 18:1-22:1 | 755.6 | 20 | 337.2 | 40 | 12.43 | ES- | 2 |
| 271 | PA 18:1-22:2 | 753.5 | 20 | 281.3 | 40 | 12.43 | ES- | 1 |

|     |              |       |    |       |    |       |     |   |
|-----|--------------|-------|----|-------|----|-------|-----|---|
| 272 | PA 18:1-22:2 | 753.5 | 20 | 335.2 | 40 | 12.43 | ES- | 2 |
| 273 | PA 18:1-22:3 | 751.5 | 20 | 281.3 | 40 | 12.43 | ES- | 1 |
| 274 | PA 18:1-22:3 | 751.5 | 20 | 333.2 | 40 | 12.43 | ES- | 2 |
| 275 | PA 18:1-22:4 | 749.5 | 20 | 281.3 | 40 | 12.43 | ES- | 1 |
| 276 | PA 18:1-22:4 | 749.5 | 20 | 331.2 | 40 | 12.43 | ES- | 2 |
| 277 | PA 18:1-22:5 | 747.5 | 20 | 281.3 | 40 | 12.43 | ES- | 1 |
| 278 | PA 18:1-22:5 | 747.5 | 20 | 329.2 | 40 | 12.43 | ES- | 2 |
| 279 | PA 18:1-22:6 | 745.5 | 20 | 281.3 | 40 | 12.43 | ES- | 1 |
| 280 | PA 18:1-22:6 | 745.5 | 20 | 327.2 | 40 | 12.43 | ES- | 2 |
| 281 | PA 18:2-18:2 | 695.5 | 20 | 279.3 | 40 | 12.43 | ES- | 1 |
| 282 | PA 18:2-18:3 | 693.5 | 20 | 277.3 | 40 | 12.43 | ES- | 1 |
| 283 | PA 18:2-18:3 | 693.5 | 20 | 279.3 | 40 | 12.43 | ES- | 2 |
| 284 | PA 18:2-18:4 | 691.4 | 20 | 275.3 | 40 | 12.43 | ES- | 1 |
| 285 | PA 18:2-18:4 | 691.4 | 20 | 279.3 | 40 | 12.43 | ES- | 2 |
| 286 | PA 18:2-20:0 | 727.5 | 20 | 279.3 | 40 | 12.43 | ES- | 1 |
| 287 | PA 18:2-20:0 | 727.5 | 20 | 311.2 | 40 | 12.43 | ES- | 2 |
| 288 | PA 18:2-20:1 | 725.5 | 20 | 279.3 | 40 | 12.43 | ES- | 1 |
| 289 | PA 18:2-20:1 | 725.5 | 20 | 309.2 | 40 | 12.43 | ES- | 2 |
| 290 | PA 18:2-20:2 | 723.5 | 20 | 279.3 | 40 | 12.43 | ES- | 1 |
| 291 | PA 18:2-20:2 | 723.5 | 20 | 307.2 | 40 | 12.43 | ES- | 2 |
| 292 | PA 18:2-20:3 | 721.5 | 20 | 279.3 | 40 | 12.43 | ES- | 1 |
| 293 | PA 18:2-20:3 | 721.5 | 20 | 305.2 | 40 | 12.43 | ES- | 2 |
| 294 | PA 18:2-20:4 | 719.5 | 20 | 279.3 | 40 | 12.43 | ES- | 1 |
| 295 | PA 18:2-20:4 | 719.5 | 20 | 303.2 | 40 | 12.43 | ES- | 2 |
| 296 | PA 18:2-20:5 | 717.5 | 20 | 279.3 | 40 | 12.43 | ES- | 1 |
| 297 | PA 18:2-20:5 | 717.5 | 20 | 301.2 | 40 | 12.43 | ES- | 2 |

Method 3: DAG and PA (3)

| No | Name          | Precursor | CV (V) | Product | CE (V) | RT setting (min) | IonMode | Ion |
|----|---------------|-----------|--------|---------|--------|------------------|---------|-----|
| 1  | DAG 18:2-22:0 | 694.6     | 50     | 337.3   | 20     | 3.25             | ES+     | 1   |
| 2  | DAG 18:2-22:0 | 694.6     | 50     | 397.4   | 20     | 3.25             | ES+     | 2   |
| 3  | DAG 18:2-22:1 | 692.6     | 50     | 337.3   | 20     | 3.25             | ES+     | 1   |
| 4  | DAG 18:2-22:1 | 692.6     | 50     | 395.4   | 20     | 3.25             | ES+     | 2   |
| 5  | DAG 18:2-22:2 | 690.6     | 50     | 337.3   | 20     | 3.25             | ES+     | 1   |
| 6  | DAG 18:2-22:2 | 690.6     | 50     | 393.4   | 20     | 3.25             | ES+     | 2   |
| 7  | DAG 18:2-22:3 | 688.6     | 50     | 337.3   | 20     | 3.25             | ES+     | 1   |

|    |               |       |    |       |    |      |     |   |
|----|---------------|-------|----|-------|----|------|-----|---|
| 8  | DAG 18:2-22:3 | 688.6 | 50 | 391.3 | 20 | 3.25 | ES+ | 2 |
| 9  | DAG 18:2-22:4 | 686.6 | 50 | 337.3 | 20 | 3.25 | ES+ | 1 |
| 10 | DAG 18:2-22:4 | 686.6 | 50 | 389.3 | 20 | 3.25 | ES+ | 2 |
| 11 | DAG 18:2-22:5 | 684.6 | 50 | 337.3 | 20 | 3.25 | ES+ | 1 |
| 12 | DAG 18:2-22:5 | 684.6 | 50 | 387.3 | 20 | 3.25 | ES+ | 2 |
| 13 | DAG 18:2-22:6 | 682.5 | 50 | 337.3 | 20 | 3.25 | ES+ | 1 |
| 14 | DAG 18:2-22:6 | 682.5 | 50 | 385.3 | 20 | 3.25 | ES+ | 2 |
| 15 | DAG 18:3-18:3 | 630.5 | 50 | 335.3 | 20 | 3.25 | ES+ | 1 |
| 16 | DAG 18:3-18:4 | 628.5 | 50 | 333.3 | 20 | 3.25 | ES+ | 1 |
| 17 | DAG 18:3-18:4 | 628.5 | 50 | 335.3 | 20 | 3.25 | ES+ | 2 |
| 18 | DAG 18:3-20:0 | 664.6 | 50 | 335.3 | 20 | 3.25 | ES+ | 1 |
| 19 | DAG 18:3-20:0 | 664.6 | 50 | 369.4 | 20 | 3.25 | ES+ | 2 |
| 20 | DAG 18:3-20:1 | 662.6 | 50 | 335.3 | 20 | 3.25 | ES+ | 1 |
| 21 | DAG 18:3-20:1 | 662.6 | 50 | 367.3 | 20 | 3.25 | ES+ | 2 |
| 22 | DAG 18:3-20:2 | 660.6 | 50 | 335.3 | 20 | 3.25 | ES+ | 1 |
| 23 | DAG 18:3-20:2 | 660.6 | 50 | 365.3 | 20 | 3.25 | ES+ | 2 |
| 24 | DAG 18:3-20:3 | 658.5 | 50 | 335.3 | 20 | 3.25 | ES+ | 1 |
| 25 | DAG 18:3-20:3 | 658.5 | 50 | 363.3 | 20 | 3.25 | ES+ | 2 |
| 26 | DAG 18:3-20:4 | 656.5 | 50 | 335.3 | 20 | 3.25 | ES+ | 1 |
| 27 | DAG 18:3-20:4 | 656.5 | 50 | 361.3 | 20 | 3.25 | ES+ | 2 |
| 28 | DAG 18:3-20:5 | 654.5 | 50 | 335.3 | 20 | 3.25 | ES+ | 1 |
| 29 | DAG 18:3-20:5 | 654.5 | 50 | 359.3 | 20 | 3.25 | ES+ | 2 |
| 30 | DAG 18:3-22:0 | 692.6 | 50 | 335.3 | 20 | 3.25 | ES+ | 1 |
| 31 | DAG 18:3-22:0 | 692.6 | 50 | 397.4 | 20 | 3.25 | ES+ | 2 |
| 32 | DAG 18:3-22:1 | 690.6 | 50 | 335.3 | 20 | 3.25 | ES+ | 1 |
| 33 | DAG 18:3-22:1 | 690.6 | 50 | 395.4 | 20 | 3.25 | ES+ | 2 |
| 34 | DAG 18:3-22:2 | 688.6 | 50 | 335.3 | 20 | 3.25 | ES+ | 1 |
| 35 | DAG 18:3-22:2 | 688.6 | 50 | 393.4 | 20 | 3.25 | ES+ | 2 |
| 36 | DAG 18:3-22:3 | 686.6 | 50 | 335.3 | 20 | 3.25 | ES+ | 1 |
| 37 | DAG 18:3-22:3 | 686.6 | 50 | 391.3 | 20 | 3.25 | ES+ | 2 |
| 38 | DAG 18:3-22:4 | 684.6 | 50 | 335.3 | 20 | 3.25 | ES+ | 1 |
| 39 | DAG 18:3-22:4 | 684.6 | 50 | 389.3 | 20 | 3.25 | ES+ | 2 |
| 40 | DAG 18:3-22:5 | 682.5 | 50 | 335.3 | 20 | 3.25 | ES+ | 1 |
| 41 | DAG 18:3-22:5 | 682.5 | 50 | 387.3 | 20 | 3.25 | ES+ | 2 |
| 42 | DAG 18:3-22:6 | 680.5 | 50 | 335.3 | 20 | 3.25 | ES+ | 1 |

|    |               |       |    |       |    |      |     |   |
|----|---------------|-------|----|-------|----|------|-----|---|
| 43 | DAG 18:3-22:6 | 680.5 | 50 | 385.3 | 20 | 3.25 | ES+ | 2 |
| 44 | DAG 18:4-18:4 | 626.5 | 50 | 333.3 | 20 | 3.25 | ES+ | 1 |
| 45 | DAG 18:4-20:0 | 662.6 | 50 | 333.3 | 20 | 3.25 | ES+ | 1 |
| 46 | DAG 18:4-20:0 | 662.6 | 50 | 369.4 | 20 | 3.25 | ES+ | 2 |
| 47 | DAG 18:4-20:1 | 660.6 | 50 | 333.3 | 20 | 3.25 | ES+ | 1 |
| 48 | DAG 18:4-20:1 | 660.6 | 50 | 367.3 | 20 | 3.25 | ES+ | 2 |
| 49 | DAG 18:4-20:2 | 658.5 | 50 | 333.3 | 20 | 3.25 | ES+ | 1 |
| 50 | DAG 18:4-20:2 | 658.5 | 50 | 365.3 | 20 | 3.25 | ES+ | 2 |
| 51 | DAG 18:4-20:3 | 656.5 | 50 | 333.3 | 20 | 3.25 | ES+ | 1 |
| 52 | DAG 18:4-20:3 | 656.5 | 50 | 363.3 | 20 | 3.25 | ES+ | 2 |
| 53 | DAG 18:4-20:4 | 654.5 | 50 | 333.3 | 20 | 3.25 | ES+ | 1 |
| 54 | DAG 18:4-20:4 | 654.5 | 50 | 361.3 | 20 | 3.25 | ES+ | 2 |
| 55 | DAG 18:4-20:5 | 652.5 | 50 | 333.3 | 20 | 3.25 | ES+ | 1 |
| 56 | DAG 18:4-20:5 | 652.5 | 50 | 359.3 | 20 | 3.25 | ES+ | 2 |
| 57 | DAG 18:4-22:0 | 690.6 | 50 | 333.3 | 20 | 3.25 | ES+ | 1 |
| 58 | DAG 18:4-22:0 | 690.6 | 50 | 397.4 | 20 | 3.25 | ES+ | 2 |
| 59 | DAG 18:4-22:1 | 688.6 | 50 | 333.3 | 20 | 3.25 | ES+ | 1 |
| 60 | DAG 18:4-22:1 | 688.6 | 50 | 395.4 | 20 | 3.25 | ES+ | 2 |
| 61 | DAG 18:4-22:2 | 686.6 | 50 | 333.3 | 20 | 3.25 | ES+ | 1 |
| 62 | DAG 18:4-22:2 | 686.6 | 50 | 393.4 | 20 | 3.25 | ES+ | 2 |
| 63 | DAG 18:4-22:3 | 684.6 | 50 | 333.3 | 20 | 3.25 | ES+ | 1 |
| 64 | DAG 18:4-22:3 | 684.6 | 50 | 391.3 | 20 | 3.25 | ES+ | 2 |
| 65 | DAG 18:4-22:4 | 682.5 | 50 | 333.3 | 20 | 3.25 | ES+ | 1 |
| 66 | DAG 18:4-22:4 | 682.5 | 50 | 389.3 | 20 | 3.25 | ES+ | 2 |
| 67 | DAG 18:4-22:5 | 680.5 | 50 | 333.3 | 20 | 3.25 | ES+ | 1 |
| 68 | DAG 18:4-22:5 | 680.5 | 50 | 387.3 | 20 | 3.25 | ES+ | 2 |
| 69 | DAG 18:4-22:6 | 678.5 | 50 | 333.3 | 20 | 3.25 | ES+ | 1 |
| 70 | DAG 18:4-22:6 | 678.5 | 50 | 385.3 | 20 | 3.25 | ES+ | 2 |
| 71 | DAG 20:0-20:0 | 698.7 | 50 | 369.4 | 20 | 3.25 | ES+ | 1 |
| 72 | DAG 20:0-20:1 | 696.7 | 50 | 367.3 | 20 | 3.25 | ES+ | 1 |
| 73 | DAG 20:0-20:1 | 696.7 | 50 | 369.4 | 20 | 3.25 | ES+ | 2 |
| 74 | DAG 20:0-20:2 | 694.6 | 50 | 365.3 | 20 | 3.25 | ES+ | 1 |
| 75 | DAG 20:0-20:2 | 694.6 | 50 | 369.4 | 20 | 3.25 | ES+ | 2 |
| 76 | DAG 20:0-20:3 | 692.6 | 50 | 363.3 | 20 | 3.25 | ES+ | 1 |
| 77 | DAG 20:0-20:3 | 692.6 | 50 | 369.4 | 20 | 3.25 | ES+ | 2 |

|     |               |       |    |       |    |      |     |   |
|-----|---------------|-------|----|-------|----|------|-----|---|
| 78  | DAG 20:0-20:4 | 690.6 | 50 | 361.3 | 20 | 3.25 | ES+ | 1 |
| 79  | DAG 20:0-20:4 | 690.6 | 50 | 369.4 | 20 | 3.25 | ES+ | 2 |
| 80  | DAG 20:0-20:5 | 688.6 | 50 | 359.3 | 20 | 3.25 | ES+ | 1 |
| 81  | DAG 20:0-20:5 | 688.6 | 50 | 369.4 | 20 | 3.25 | ES+ | 2 |
| 82  | DAG 20:0-22:0 | 726.7 | 50 | 369.4 | 20 | 3.25 | ES+ | 1 |
| 83  | DAG 20:0-22:0 | 726.7 | 50 | 397.4 | 20 | 3.25 | ES+ | 2 |
| 84  | DAG 20:0-22:1 | 724.7 | 50 | 369.4 | 20 | 3.25 | ES+ | 1 |
| 85  | DAG 20:0-22:1 | 724.7 | 50 | 395.4 | 20 | 3.25 | ES+ | 2 |
| 86  | DAG 20:0-22:2 | 722.7 | 50 | 369.4 | 20 | 3.25 | ES+ | 1 |
| 87  | DAG 20:0-22:2 | 722.7 | 50 | 393.4 | 20 | 3.25 | ES+ | 2 |
| 88  | DAG 20:0-22:3 | 720.7 | 50 | 369.4 | 20 | 3.25 | ES+ | 1 |
| 89  | DAG 20:0-22:3 | 720.7 | 50 | 391.3 | 20 | 3.25 | ES+ | 2 |
| 90  | DAG 20:0-22:4 | 718.6 | 50 | 369.4 | 20 | 3.25 | ES+ | 1 |
| 91  | DAG 20:0-22:4 | 718.6 | 50 | 389.3 | 20 | 3.25 | ES+ | 2 |
| 92  | DAG 20:0-22:5 | 716.6 | 50 | 369.4 | 20 | 3.25 | ES+ | 1 |
| 93  | DAG 20:0-22:5 | 716.6 | 50 | 387.3 | 20 | 3.25 | ES+ | 2 |
| 94  | DAG 20:0-22:6 | 714.6 | 50 | 369.4 | 20 | 3.25 | ES+ | 1 |
| 95  | DAG 20:0-22:6 | 714.6 | 50 | 385.3 | 20 | 3.25 | ES+ | 2 |
| 96  | DAG 20:1-20:1 | 694.6 | 50 | 367.3 | 20 | 3.25 | ES+ | 1 |
| 97  | DAG 20:1-20:2 | 692.6 | 50 | 365.3 | 20 | 3.25 | ES+ | 1 |
| 98  | DAG 20:1-20:2 | 692.6 | 50 | 367.3 | 20 | 3.25 | ES+ | 2 |
| 99  | DAG 20:1-20:3 | 690.6 | 50 | 363.3 | 20 | 3.25 | ES+ | 1 |
| 100 | DAG 20:1-20:3 | 690.6 | 50 | 367.3 | 20 | 3.25 | ES+ | 2 |
| 101 | DAG 20:1-20:4 | 688.6 | 50 | 361.3 | 20 | 3.25 | ES+ | 1 |
| 102 | DAG 20:1-20:4 | 688.6 | 50 | 367.3 | 20 | 3.25 | ES+ | 2 |
| 103 | DAG 20:1-20:5 | 686.6 | 50 | 359.3 | 20 | 3.25 | ES+ | 1 |
| 104 | DAG 20:1-20:5 | 686.6 | 50 | 367.3 | 20 | 3.25 | ES+ | 2 |
| 105 | DAG 20:1-22:0 | 724.7 | 50 | 367.3 | 20 | 3.25 | ES+ | 1 |
| 106 | DAG 20:1-22:0 | 724.7 | 50 | 397.4 | 20 | 3.25 | ES+ | 2 |
| 107 | DAG 20:1-22:1 | 722.7 | 50 | 367.3 | 20 | 3.25 | ES+ | 1 |
| 108 | DAG 20:1-22:1 | 722.7 | 50 | 395.4 | 20 | 3.25 | ES+ | 2 |
| 109 | DAG 20:1-22:2 | 720.7 | 50 | 367.3 | 20 | 3.25 | ES+ | 1 |
| 110 | DAG 20:1-22:2 | 720.7 | 50 | 393.4 | 20 | 3.25 | ES+ | 2 |
| 111 | DAG 20:1-22:3 | 718.6 | 50 | 367.3 | 20 | 3.25 | ES+ | 1 |
| 112 | DAG 20:1-22:3 | 718.6 | 50 | 391.3 | 20 | 3.25 | ES+ | 2 |



|     |               |       |    |       |    |       |     |   |
|-----|---------------|-------|----|-------|----|-------|-----|---|
| 113 | DAG 20:1-22:4 | 716.6 | 50 | 367.3 | 20 | 3.25  | ES+ | 1 |
| 114 | DAG 20:1-22:4 | 716.6 | 50 | 389.3 | 20 | 3.25  | ES+ | 2 |
| 115 | DAG 20:1-22:5 | 714.6 | 50 | 367.3 | 20 | 3.25  | ES+ | 1 |
| 116 | DAG 20:1-22:5 | 714.6 | 50 | 387.3 | 20 | 3.25  | ES+ | 2 |
| 117 | DAG 20:1-22:6 | 712.6 | 50 | 367.3 | 20 | 3.25  | ES+ | 1 |
| 118 | DAG 20:1-22:6 | 712.6 | 50 | 385.3 | 20 | 3.25  | ES+ | 2 |
| 119 | DAG 20:2-20:2 | 690.6 | 50 | 365.3 | 20 | 3.25  | ES+ | 1 |
| 120 | DAG 20:2-20:3 | 688.6 | 50 | 363.3 | 20 | 3.25  | ES+ | 1 |
| 121 | DAG 20:2-20:3 | 688.6 | 50 | 365.3 | 20 | 3.25  | ES+ | 2 |
| 122 | DAG 20:2-20:4 | 686.6 | 50 | 361.3 | 20 | 3.25  | ES+ | 1 |
| 123 | DAG 20:2-20:4 | 686.6 | 50 | 365.3 | 20 | 3.25  | ES+ | 2 |
| 124 | DAG 20:2-20:5 | 684.6 | 50 | 359.3 | 20 | 3.25  | ES+ | 1 |
| 125 | DAG 20:2-20:5 | 684.6 | 50 | 365.3 | 20 | 3.25  | ES+ | 2 |
| 126 | DAG 20:2-22:0 | 722.7 | 50 | 365.3 | 20 | 3.25  | ES+ | 1 |
| 127 | DAG 20:2-22:0 | 722.7 | 50 | 397.4 | 20 | 3.25  | ES+ | 2 |
| 128 | DAG 20:2-22:1 | 720.7 | 50 | 365.3 | 20 | 3.25  | ES+ | 1 |
| 129 | DAG 20:2-22:1 | 720.7 | 50 | 395.4 | 20 | 3.25  | ES+ | 2 |
| 130 | DAG 20:2-22:2 | 718.6 | 50 | 365.3 | 20 | 3.25  | ES+ | 1 |
| 131 | DAG 20:2-22:2 | 718.6 | 50 | 393.4 | 20 | 3.25  | ES+ | 2 |
| 132 | DAG 20:2-22:3 | 716.6 | 50 | 365.3 | 20 | 3.25  | ES+ | 1 |
| 133 | DAG 20:2-22:3 | 716.6 | 50 | 391.3 | 20 | 3.25  | ES+ | 2 |
| 134 | DAG 20:2-22:4 | 714.6 | 50 | 365.3 | 20 | 3.25  | ES+ | 1 |
| 135 | DAG 20:2-22:4 | 714.6 | 50 | 389.3 | 20 | 3.25  | ES+ | 2 |
| 136 | DAG 20:2-22:5 | 712.6 | 50 | 365.3 | 20 | 3.25  | ES+ | 1 |
| 137 | DAG 20:2-22:5 | 712.6 | 50 | 387.3 | 20 | 3.25  | ES+ | 2 |
| 138 | DAG 20:2-22:6 | 710.6 | 50 | 365.3 | 20 | 3.25  | ES+ | 1 |
| 139 | DAG 20:2-22:6 | 710.6 | 50 | 385.3 | 20 | 3.25  | ES+ | 2 |
| 140 | DAG 20:3-20:3 | 686.6 | 50 | 363.3 | 20 | 3.25  | ES+ | 1 |
| 141 | DAG 20:3-20:4 | 684.6 | 50 | 361.3 | 20 | 3.25  | ES+ | 1 |
| 142 | DAG 20:3-20:4 | 684.6 | 50 | 363.3 | 20 | 3.25  | ES+ | 2 |
| 143 | DAG 20:3-20:5 | 682.5 | 50 | 359.3 | 20 | 3.25  | ES+ | 1 |
| 144 | DAG 20:3-20:5 | 682.5 | 50 | 363.3 | 20 | 3.25  | ES+ | 2 |
| 145 | PA 18:2-22:0  | 755.6 | 20 | 279.3 | 40 | 12.43 | ES- | 1 |
| 146 | PA 18:2-22:0  | 755.6 | 20 | 339.2 | 40 | 12.43 | ES- | 2 |
| 147 | PA 18:2-22:1  | 753.5 | 20 | 279.3 | 40 | 12.43 | ES- | 1 |

|     |              |       |    |       |    |       |     |   |
|-----|--------------|-------|----|-------|----|-------|-----|---|
| 148 | PA 18:2-22:1 | 753.5 | 20 | 337.2 | 40 | 12.43 | ES- | 2 |
| 149 | PA 18:2-22:2 | 751.5 | 20 | 279.3 | 40 | 12.43 | ES- | 1 |
| 150 | PA 18:2-22:2 | 751.5 | 20 | 335.2 | 40 | 12.43 | ES- | 2 |
| 151 | PA 18:2-22:3 | 749.5 | 20 | 279.3 | 40 | 12.43 | ES- | 1 |
| 152 | PA 18:2-22:3 | 749.5 | 20 | 333.2 | 40 | 12.43 | ES- | 2 |
| 153 | PA 18:2-22:4 | 747.5 | 20 | 279.3 | 40 | 12.43 | ES- | 1 |
| 154 | PA 18:2-22:4 | 747.5 | 20 | 331.2 | 40 | 12.43 | ES- | 2 |
| 155 | PA 18:2-22:5 | 745.5 | 20 | 279.3 | 40 | 12.43 | ES- | 1 |
| 156 | PA 18:2-22:5 | 745.5 | 20 | 329.2 | 40 | 12.43 | ES- | 2 |
| 157 | PA 18:2-22:6 | 743.5 | 20 | 279.3 | 40 | 12.43 | ES- | 1 |
| 158 | PA 18:2-22:6 | 743.5 | 20 | 327.2 | 40 | 12.43 | ES- | 2 |
| 159 | PA 18:3-18:3 | 691.4 | 20 | 277.3 | 40 | 12.43 | ES- | 1 |
| 160 | PA 18:3-18:4 | 689.4 | 20 | 275.3 | 40 | 12.43 | ES- | 1 |
| 161 | PA 18:3-18:4 | 689.4 | 20 | 277.3 | 40 | 12.43 | ES- | 2 |
| 162 | PA 18:3-20:0 | 725.5 | 20 | 277.3 | 40 | 12.43 | ES- | 1 |
| 163 | PA 18:3-20:0 | 725.5 | 20 | 311.2 | 40 | 12.43 | ES- | 2 |
| 164 | PA 18:3-20:1 | 723.5 | 20 | 277.3 | 40 | 12.43 | ES- | 1 |
| 165 | PA 18:3-20:1 | 723.5 | 20 | 309.2 | 40 | 12.43 | ES- | 2 |
| 166 | PA 18:3-20:2 | 721.5 | 20 | 277.3 | 40 | 12.43 | ES- | 1 |
| 167 | PA 18:3-20:2 | 721.5 | 20 | 307.2 | 40 | 12.43 | ES- | 2 |
| 168 | PA 18:3-20:3 | 719.5 | 20 | 277.3 | 40 | 12.43 | ES- | 1 |
| 169 | PA 18:3-20:3 | 719.5 | 20 | 305.2 | 40 | 12.43 | ES- | 2 |
| 170 | PA 18:3-20:4 | 717.5 | 20 | 277.3 | 40 | 12.43 | ES- | 1 |
| 171 | PA 18:3-20:4 | 717.5 | 20 | 303.2 | 40 | 12.43 | ES- | 2 |
| 172 | PA 18:3-20:5 | 715.4 | 20 | 277.3 | 40 | 12.43 | ES- | 1 |
| 173 | PA 18:3-20:5 | 715.4 | 20 | 301.2 | 40 | 12.43 | ES- | 2 |
| 174 | PA 18:3-22:0 | 753.5 | 20 | 277.3 | 40 | 12.43 | ES- | 1 |
| 175 | PA 18:3-22:0 | 753.5 | 20 | 339.2 | 40 | 12.43 | ES- | 2 |
| 176 | PA 18:3-22:1 | 751.5 | 20 | 277.3 | 40 | 12.43 | ES- | 1 |
| 177 | PA 18:3-22:1 | 751.5 | 20 | 337.2 | 40 | 12.43 | ES- | 2 |
| 178 | PA 18:3-22:2 | 749.5 | 20 | 277.3 | 40 | 12.43 | ES- | 1 |
| 179 | PA 18:3-22:2 | 749.5 | 20 | 335.2 | 40 | 12.43 | ES- | 2 |
| 180 | PA 18:3-22:3 | 747.5 | 20 | 277.3 | 40 | 12.43 | ES- | 1 |
| 181 | PA 18:3-22:3 | 747.5 | 20 | 333.2 | 40 | 12.43 | ES- | 2 |
| 182 | PA 18:3-22:4 | 745.5 | 20 | 277.3 | 40 | 12.43 | ES- | 1 |

|     |              |       |    |       |    |       |     |   |
|-----|--------------|-------|----|-------|----|-------|-----|---|
| 183 | PA 18:3-22:4 | 745.5 | 20 | 331.2 | 40 | 12.43 | ES- | 2 |
| 184 | PA 18:3-22:5 | 743.5 | 20 | 277.3 | 40 | 12.43 | ES- | 1 |
| 185 | PA 18:3-22:5 | 743.5 | 20 | 329.2 | 40 | 12.43 | ES- | 2 |
| 186 | PA 18:3-22:6 | 741.5 | 20 | 277.3 | 40 | 12.43 | ES- | 1 |
| 187 | PA 18:3-22:6 | 741.5 | 20 | 327.2 | 40 | 12.43 | ES- | 2 |
| 188 | PA 18:4-18:4 | 687.4 | 20 | 275.3 | 40 | 12.43 | ES- | 1 |
| 189 | PA 18:4-20:0 | 723.5 | 20 | 275.3 | 40 | 12.43 | ES- | 1 |
| 190 | PA 18:4-20:0 | 723.5 | 20 | 311.2 | 40 | 12.43 | ES- | 2 |
| 191 | PA 18:4-20:1 | 721.5 | 20 | 275.3 | 40 | 12.43 | ES- | 1 |
| 192 | PA 18:4-20:1 | 721.5 | 20 | 309.2 | 40 | 12.43 | ES- | 2 |
| 193 | PA 18:4-20:2 | 719.5 | 20 | 275.3 | 40 | 12.43 | ES- | 1 |
| 194 | PA 18:4-20:2 | 719.5 | 20 | 307.2 | 40 | 12.43 | ES- | 2 |
| 195 | PA 18:4-20:3 | 717.5 | 20 | 275.3 | 40 | 12.43 | ES- | 1 |
| 196 | PA 18:4-20:3 | 717.5 | 20 | 305.2 | 40 | 12.43 | ES- | 2 |
| 197 | PA 18:4-20:4 | 715.4 | 20 | 275.3 | 40 | 12.43 | ES- | 1 |
| 198 | PA 18:4-20:4 | 715.4 | 20 | 303.2 | 40 | 12.43 | ES- | 2 |
| 199 | PA 18:4-20:5 | 713.4 | 20 | 275.3 | 40 | 12.43 | ES- | 1 |
| 200 | PA 18:4-20:5 | 713.4 | 20 | 301.2 | 40 | 12.43 | ES- | 2 |
| 201 | PA 18:4-22:0 | 751.5 | 20 | 275.3 | 40 | 12.43 | ES- | 1 |
| 202 | PA 18:4-22:0 | 751.5 | 20 | 339.2 | 40 | 12.43 | ES- | 2 |
| 203 | PA 18:4-22:1 | 749.5 | 20 | 275.3 | 40 | 12.43 | ES- | 1 |
| 204 | PA 18:4-22:1 | 749.5 | 20 | 337.2 | 40 | 12.43 | ES- | 2 |
| 205 | PA 18:4-22:2 | 747.5 | 20 | 275.3 | 40 | 12.43 | ES- | 1 |
| 206 | PA 18:4-22:2 | 747.5 | 20 | 335.2 | 40 | 12.43 | ES- | 2 |
| 207 | PA 18:4-22:3 | 745.5 | 20 | 275.3 | 40 | 12.43 | ES- | 1 |
| 208 | PA 18:4-22:3 | 745.5 | 20 | 333.2 | 40 | 12.43 | ES- | 2 |
| 209 | PA 18:4-22:4 | 743.5 | 20 | 275.3 | 40 | 12.43 | ES- | 1 |
| 210 | PA 18:4-22:4 | 743.5 | 20 | 331.2 | 40 | 12.43 | ES- | 2 |
| 211 | PA 18:4-22:5 | 741.5 | 20 | 275.3 | 40 | 12.43 | ES- | 1 |
| 212 | PA 18:4-22:5 | 741.5 | 20 | 329.2 | 40 | 12.43 | ES- | 2 |
| 213 | PA 18:4-22:6 | 739.4 | 20 | 275.3 | 40 | 12.43 | ES- | 1 |
| 214 | PA 18:4-22:6 | 739.4 | 20 | 327.2 | 40 | 12.43 | ES- | 2 |
| 215 | PA 20:0-20:0 | 759.6 | 20 | 311.2 | 40 | 12.43 | ES- | 1 |
| 216 | PA 20:0-20:1 | 757.6 | 20 | 309.2 | 40 | 12.43 | ES- | 1 |
| 217 | PA 20:0-20:1 | 757.6 | 20 | 311.2 | 40 | 12.43 | ES- | 2 |

|     |              |       |    |       |    |       |     |   |
|-----|--------------|-------|----|-------|----|-------|-----|---|
| 218 | PA 20:0-20:2 | 755.6 | 20 | 307.2 | 40 | 12.43 | ES- | 1 |
| 219 | PA 20:0-20:2 | 755.6 | 20 | 311.2 | 40 | 12.43 | ES- | 2 |
| 220 | PA 20:0-20:3 | 753.5 | 20 | 305.2 | 40 | 12.43 | ES- | 1 |
| 221 | PA 20:0-20:3 | 753.5 | 20 | 311.2 | 40 | 12.43 | ES- | 2 |
| 222 | PA 20:0-20:4 | 751.5 | 20 | 303.2 | 40 | 12.43 | ES- | 1 |
| 223 | PA 20:0-20:4 | 751.5 | 20 | 311.2 | 40 | 12.43 | ES- | 2 |
| 224 | PA 20:0-20:5 | 749.5 | 20 | 301.2 | 40 | 12.43 | ES- | 1 |
| 225 | PA 20:0-20:5 | 749.5 | 20 | 311.2 | 40 | 12.43 | ES- | 2 |
| 226 | PA 20:0-22:0 | 787.6 | 20 | 311.2 | 40 | 12.43 | ES- | 1 |
| 227 | PA 20:0-22:0 | 787.6 | 20 | 339.2 | 40 | 12.43 | ES- | 2 |
| 228 | PA 20:0-22:1 | 785.6 | 20 | 311.2 | 40 | 12.43 | ES- | 1 |
| 229 | PA 20:0-22:1 | 785.6 | 20 | 337.2 | 40 | 12.43 | ES- | 2 |
| 230 | PA 20:0-22:2 | 783.6 | 20 | 311.2 | 40 | 12.43 | ES- | 1 |
| 231 | PA 20:0-22:2 | 783.6 | 20 | 335.2 | 40 | 12.43 | ES- | 2 |
| 232 | PA 20:0-22:3 | 781.6 | 20 | 311.2 | 40 | 12.43 | ES- | 1 |
| 233 | PA 20:0-22:3 | 781.6 | 20 | 333.2 | 40 | 12.43 | ES- | 2 |
| 234 | PA 20:0-22:4 | 779.6 | 20 | 311.2 | 40 | 12.43 | ES- | 1 |
| 235 | PA 20:0-22:4 | 779.6 | 20 | 331.2 | 40 | 12.43 | ES- | 2 |
| 236 | PA 20:0-22:5 | 777.5 | 20 | 311.2 | 40 | 12.43 | ES- | 1 |
| 237 | PA 20:0-22:5 | 777.5 | 20 | 329.2 | 40 | 12.43 | ES- | 2 |
| 238 | PA 20:0-22:6 | 775.5 | 20 | 311.2 | 40 | 12.43 | ES- | 1 |
| 239 | PA 20:0-22:6 | 775.5 | 20 | 327.2 | 40 | 12.43 | ES- | 2 |
| 240 | PA 20:1-20:1 | 755.6 | 20 | 309.2 | 40 | 12.43 | ES- | 1 |
| 241 | PA 20:1-20:2 | 753.5 | 20 | 307.2 | 40 | 12.43 | ES- | 1 |
| 242 | PA 20:1-20:2 | 753.5 | 20 | 309.2 | 40 | 12.43 | ES- | 2 |
| 243 | PA 20:1-20:3 | 751.5 | 20 | 305.2 | 40 | 12.43 | ES- | 1 |
| 244 | PA 20:1-20:3 | 751.5 | 20 | 309.2 | 40 | 12.43 | ES- | 2 |
| 245 | PA 20:1-20:4 | 749.5 | 20 | 303.2 | 40 | 12.43 | ES- | 1 |
| 246 | PA 20:1-20:4 | 749.5 | 20 | 309.2 | 40 | 12.43 | ES- | 2 |
| 247 | PA 20:1-20:5 | 747.5 | 20 | 301.2 | 40 | 12.43 | ES- | 1 |
| 248 | PA 20:1-20:5 | 747.5 | 20 | 309.2 | 40 | 12.43 | ES- | 2 |
| 249 | PA 20:1-22:0 | 785.6 | 20 | 309.2 | 40 | 12.43 | ES- | 1 |
| 250 | PA 20:1-22:0 | 785.6 | 20 | 339.2 | 40 | 12.43 | ES- | 2 |
| 251 | PA 20:1-22:1 | 783.6 | 20 | 309.2 | 40 | 12.43 | ES- | 1 |
| 252 | PA 20:1-22:1 | 783.6 | 20 | 337.2 | 40 | 12.43 | ES- | 2 |

|     |              |       |    |       |    |       |     |   |
|-----|--------------|-------|----|-------|----|-------|-----|---|
| 253 | PA 20:1-22:2 | 781.6 | 20 | 309.2 | 40 | 12.43 | ES- | 1 |
| 254 | PA 20:1-22:2 | 781.6 | 20 | 335.2 | 40 | 12.43 | ES- | 2 |
| 255 | PA 20:1-22:3 | 779.6 | 20 | 309.2 | 40 | 12.43 | ES- | 1 |
| 256 | PA 20:1-22:3 | 779.6 | 20 | 333.2 | 40 | 12.43 | ES- | 2 |
| 257 | PA 20:1-22:4 | 777.5 | 20 | 309.2 | 40 | 12.43 | ES- | 1 |
| 258 | PA 20:1-22:4 | 777.5 | 20 | 331.2 | 40 | 12.43 | ES- | 2 |
| 259 | PA 20:1-22:5 | 775.5 | 20 | 309.2 | 40 | 12.43 | ES- | 1 |
| 260 | PA 20:1-22:5 | 775.5 | 20 | 329.2 | 40 | 12.43 | ES- | 2 |
| 261 | PA 20:1-22:6 | 773.5 | 20 | 309.2 | 40 | 12.43 | ES- | 1 |
| 262 | PA 20:1-22:6 | 773.5 | 20 | 327.2 | 40 | 12.43 | ES- | 2 |
| 263 | PA 20:2-20:2 | 751.5 | 20 | 307.2 | 40 | 12.43 | ES- | 1 |
| 264 | PA 20:2-20:3 | 749.5 | 20 | 305.2 | 40 | 12.43 | ES- | 1 |
| 265 | PA 20:2-20:3 | 749.5 | 20 | 307.2 | 40 | 12.43 | ES- | 2 |
| 266 | PA 20:2-20:4 | 747.5 | 20 | 303.2 | 40 | 12.43 | ES- | 1 |
| 267 | PA 20:2-20:4 | 747.5 | 20 | 307.2 | 40 | 12.43 | ES- | 2 |
| 268 | PA 20:2-20:5 | 745.5 | 20 | 301.2 | 40 | 12.43 | ES- | 1 |
| 269 | PA 20:2-20:5 | 745.5 | 20 | 307.2 | 40 | 12.43 | ES- | 2 |
| 270 | PA 20:2-22:0 | 783.6 | 20 | 307.2 | 40 | 12.43 | ES- | 1 |
| 271 | PA 20:2-22:0 | 783.6 | 20 | 339.2 | 40 | 12.43 | ES- | 2 |
| 272 | PA 20:2-22:1 | 781.6 | 20 | 307.2 | 40 | 12.43 | ES- | 1 |
| 273 | PA 20:2-22:1 | 781.6 | 20 | 337.2 | 40 | 12.43 | ES- | 2 |
| 274 | PA 20:2-22:2 | 779.6 | 20 | 307.2 | 40 | 12.43 | ES- | 1 |
| 275 | PA 20:2-22:2 | 779.6 | 20 | 335.2 | 40 | 12.43 | ES- | 2 |
| 276 | PA 20:2-22:3 | 777.5 | 20 | 307.2 | 40 | 12.43 | ES- | 1 |
| 277 | PA 20:2-22:3 | 777.5 | 20 | 333.2 | 40 | 12.43 | ES- | 2 |
| 278 | PA 20:2-22:4 | 775.5 | 20 | 307.2 | 40 | 12.43 | ES- | 1 |
| 279 | PA 20:2-22:4 | 775.5 | 20 | 331.2 | 40 | 12.43 | ES- | 2 |
| 280 | PA 20:2-22:5 | 773.5 | 20 | 307.2 | 40 | 12.43 | ES- | 1 |
| 281 | PA 20:2-22:5 | 773.5 | 20 | 329.2 | 40 | 12.43 | ES- | 2 |
| 282 | PA 20:2-22:6 | 771.5 | 20 | 307.2 | 40 | 12.43 | ES- | 1 |
| 283 | PA 20:2-22:6 | 771.5 | 20 | 327.2 | 40 | 12.43 | ES- | 2 |
| 284 | PA 20:3-20:3 | 747.5 | 20 | 305.2 | 40 | 12.43 | ES- | 1 |
| 285 | PA 20:3-20:4 | 745.5 | 20 | 303.2 | 40 | 12.43 | ES- | 1 |
| 286 | PA 20:3-20:4 | 745.5 | 20 | 305.2 | 40 | 12.43 | ES- | 2 |
| 287 | PA 20:3-20:5 | 743.5 | 20 | 301.2 | 40 | 12.43 | ES- | 1 |

|     |              |       |    |       |    |       |     |   |
|-----|--------------|-------|----|-------|----|-------|-----|---|
| 288 | PA 20:3-20:5 | 743.5 | 20 | 305.2 | 40 | 12.43 | ES- | 2 |
|-----|--------------|-------|----|-------|----|-------|-----|---|

Method 4: DAG and PA (4)

| No | Name          | Precursor | CV (V) | Product | CE (V) | RT setting (min) | IonMode | Ion |
|----|---------------|-----------|--------|---------|--------|------------------|---------|-----|
| 1  | DAG 20:3-22:0 | 720.7     | 50     | 363.3   | 20     | 3.25             | ES+     | 1   |
| 2  | DAG 20:3-22:0 | 720.7     | 50     | 397.4   | 20     | 3.25             | ES+     | 2   |
| 3  | DAG 20:3-22:1 | 718.6     | 50     | 363.3   | 20     | 3.25             | ES+     | 1   |
| 4  | DAG 20:3-22:1 | 718.6     | 50     | 395.4   | 20     | 3.25             | ES+     | 2   |
| 5  | DAG 20:3-22:2 | 716.6     | 50     | 363.3   | 20     | 3.25             | ES+     | 1   |
| 6  | DAG 20:3-22:2 | 716.6     | 50     | 393.4   | 20     | 3.25             | ES+     | 2   |
| 7  | DAG 20:3-22:3 | 714.6     | 50     | 363.3   | 20     | 3.25             | ES+     | 1   |
| 8  | DAG 20:3-22:3 | 714.6     | 50     | 391.3   | 20     | 3.25             | ES+     | 2   |
| 9  | DAG 20:3-22:4 | 712.6     | 50     | 363.3   | 20     | 3.25             | ES+     | 1   |
| 10 | DAG 20:3-22:4 | 712.6     | 50     | 389.3   | 20     | 3.25             | ES+     | 2   |
| 11 | DAG 20:3-22:5 | 710.6     | 50     | 363.3   | 20     | 3.25             | ES+     | 1   |
| 12 | DAG 20:3-22:5 | 710.6     | 50     | 387.3   | 20     | 3.25             | ES+     | 2   |
| 13 | DAG 20:3-22:6 | 708.6     | 50     | 363.3   | 20     | 3.25             | ES+     | 1   |
| 14 | DAG 20:3-22:6 | 708.6     | 50     | 385.3   | 20     | 3.25             | ES+     | 2   |
| 15 | DAG 20:4-20:4 | 682.5     | 50     | 361.3   | 20     | 3.25             | ES+     | 1   |
| 16 | DAG 20:4-20:5 | 680.5     | 50     | 359.3   | 20     | 3.25             | ES+     | 1   |
| 17 | DAG 20:4-20:5 | 680.5     | 50     | 361.3   | 20     | 3.25             | ES+     | 2   |
| 18 | DAG 20:4-22:0 | 718.6     | 50     | 361.3   | 20     | 3.25             | ES+     | 1   |
| 19 | DAG 20:4-22:0 | 718.6     | 50     | 397.4   | 20     | 3.25             | ES+     | 2   |
| 20 | DAG 20:4-22:1 | 716.6     | 50     | 361.3   | 20     | 3.25             | ES+     | 1   |
| 21 | DAG 20:4-22:1 | 716.6     | 50     | 395.3   | 20     | 3.25             | ES+     | 2   |
| 22 | DAG 20:4-22:2 | 714.6     | 50     | 361.3   | 20     | 3.25             | ES+     | 1   |
| 23 | DAG 20:4-22:2 | 714.6     | 50     | 393.3   | 20     | 3.25             | ES+     | 2   |
| 24 | DAG 20:4-22:3 | 712.6     | 50     | 361.3   | 20     | 3.25             | ES+     | 1   |
| 25 | DAG 20:4-22:3 | 712.6     | 50     | 391.3   | 20     | 3.25             | ES+     | 2   |
| 26 | DAG 20:4-22:4 | 710.6     | 50     | 361.3   | 20     | 3.25             | ES+     | 1   |
| 27 | DAG 20:4-22:4 | 710.6     | 50     | 389.3   | 20     | 3.25             | ES+     | 2   |
| 28 | DAG 20:4-22:5 | 708.6     | 50     | 361.3   | 20     | 3.25             | ES+     | 1   |
| 29 | DAG 20:4-22:5 | 708.6     | 50     | 387.3   | 20     | 3.25             | ES+     | 2   |
| 30 | DAG 20:4-22:6 | 706.5     | 50     | 361.3   | 20     | 3.25             | ES+     | 1   |
| 31 | DAG 20:4-22:6 | 706.5     | 50     | 385.3   | 20     | 3.25             | ES+     | 2   |
| 32 | DAG 20:5-20:5 | 678.5     | 50     | 359.3   | 20     | 3.25             | ES+     | 1   |

|    |               |       |    |       |    |      |     |   |
|----|---------------|-------|----|-------|----|------|-----|---|
| 33 | DAG 20:5-22:0 | 716.6 | 50 | 359.3 | 20 | 3.25 | ES+ | 1 |
| 34 | DAG 20:5-22:0 | 716.6 | 50 | 397.4 | 20 | 3.25 | ES+ | 2 |
| 35 | DAG 20:5-22:1 | 714.6 | 50 | 359.3 | 20 | 3.25 | ES+ | 1 |
| 36 | DAG 20:5-22:1 | 714.6 | 50 | 395.3 | 20 | 3.25 | ES+ | 2 |
| 37 | DAG 20:5-22:2 | 712.6 | 50 | 359.3 | 20 | 3.25 | ES+ | 1 |
| 38 | DAG 20:5-22:2 | 712.6 | 50 | 393.3 | 20 | 3.25 | ES+ | 2 |
| 39 | DAG 20:5-22:3 | 710.6 | 50 | 359.3 | 20 | 3.25 | ES+ | 1 |
| 40 | DAG 20:5-22:3 | 710.6 | 50 | 391.3 | 20 | 3.25 | ES+ | 2 |
| 41 | DAG 20:5-22:4 | 708.6 | 50 | 359.3 | 20 | 3.25 | ES+ | 1 |
| 42 | DAG 20:5-22:4 | 708.6 | 50 | 389.3 | 20 | 3.25 | ES+ | 2 |
| 43 | DAG 20:5-22:5 | 706.5 | 50 | 359.3 | 20 | 3.25 | ES+ | 1 |
| 44 | DAG 20:5-22:5 | 706.5 | 50 | 387.3 | 20 | 3.25 | ES+ | 2 |
| 45 | DAG 20:5-22:6 | 704.5 | 50 | 359.3 | 20 | 3.25 | ES+ | 1 |
| 46 | DAG 20:5-22:6 | 704.5 | 50 | 385.3 | 20 | 3.25 | ES+ | 2 |
| 47 | DAG 22:0-22:0 | 754.7 | 50 | 397.4 | 20 | 3.25 | ES+ | 1 |
| 48 | DAG 22:0-22:1 | 752.7 | 50 | 395.4 | 20 | 3.25 | ES+ | 1 |
| 49 | DAG 22:0-22:1 | 752.7 | 50 | 397.4 | 20 | 3.25 | ES+ | 2 |
| 50 | DAG 22:0-22:2 | 750.7 | 50 | 393.4 | 20 | 3.25 | ES+ | 1 |
| 51 | DAG 22:0-22:2 | 750.7 | 50 | 397.4 | 20 | 3.25 | ES+ | 2 |
| 52 | DAG 22:0-22:3 | 748.7 | 50 | 391.3 | 20 | 3.25 | ES+ | 1 |
| 53 | DAG 22:0-22:3 | 748.7 | 50 | 397.4 | 20 | 3.25 | ES+ | 2 |
| 54 | DAG 22:0-22:4 | 746.7 | 50 | 389.3 | 20 | 3.25 | ES+ | 1 |
| 55 | DAG 22:0-22:4 | 746.7 | 50 | 397.4 | 20 | 3.25 | ES+ | 2 |
| 56 | DAG 22:0-22:5 | 744.7 | 50 | 387.3 | 20 | 3.25 | ES+ | 1 |
| 57 | DAG 22:0-22:5 | 744.7 | 50 | 397.4 | 20 | 3.25 | ES+ | 2 |
| 58 | DAG 22:0-22:6 | 742.6 | 50 | 385.3 | 20 | 3.25 | ES+ | 1 |
| 59 | DAG 22:0-22:6 | 742.6 | 50 | 397.4 | 20 | 3.25 | ES+ | 2 |
| 60 | DAG 22:1-22:1 | 750.7 | 50 | 395.4 | 20 | 3.25 | ES+ | 1 |
| 61 | DAG 22:1-22:2 | 748.7 | 50 | 393.4 | 20 | 3.25 | ES+ | 1 |
| 62 | DAG 22:1-22:2 | 748.7 | 50 | 395.4 | 20 | 3.25 | ES+ | 2 |
| 63 | DAG 22:1-22:3 | 746.7 | 50 | 391.3 | 20 | 3.25 | ES+ | 1 |
| 64 | DAG 22:1-22:3 | 746.7 | 50 | 395.4 | 20 | 3.25 | ES+ | 2 |
| 65 | DAG 22:1-22:4 | 744.7 | 50 | 389.3 | 20 | 3.25 | ES+ | 1 |
| 66 | DAG 22:1-22:4 | 744.7 | 50 | 395.4 | 20 | 3.25 | ES+ | 2 |
| 67 | DAG 22:1-22:5 | 742.6 | 50 | 387.3 | 20 | 3.25 | ES+ | 1 |

|     |               |       |    |       |    |       |     |   |
|-----|---------------|-------|----|-------|----|-------|-----|---|
| 68  | DAG 22:1-22:5 | 742.6 | 50 | 395.4 | 20 | 3.25  | ES+ | 2 |
| 69  | DAG 22:1-22:6 | 740.6 | 50 | 385.3 | 20 | 3.25  | ES+ | 1 |
| 70  | DAG 22:1-22:6 | 740.6 | 50 | 395.4 | 20 | 3.25  | ES+ | 2 |
| 71  | DAG 22:2-22:2 | 746.7 | 50 | 393.4 | 20 | 3.25  | ES+ | 1 |
| 72  | DAG 22:2-22:3 | 744.7 | 50 | 391.3 | 20 | 3.25  | ES+ | 1 |
| 73  | DAG 22:2-22:3 | 744.7 | 50 | 393.4 | 20 | 3.25  | ES+ | 2 |
| 74  | DAG 22:2-22:4 | 742.6 | 50 | 389.3 | 20 | 3.25  | ES+ | 1 |
| 75  | DAG 22:2-22:4 | 742.6 | 50 | 393.4 | 20 | 3.25  | ES+ | 2 |
| 76  | DAG 22:2-22:5 | 740.6 | 50 | 387.3 | 20 | 3.25  | ES+ | 1 |
| 77  | DAG 22:2-22:5 | 740.6 | 50 | 393.4 | 20 | 3.25  | ES+ | 2 |
| 78  | DAG 22:2-22:6 | 738.6 | 50 | 385.3 | 20 | 3.25  | ES+ | 1 |
| 79  | DAG 22:2-22:6 | 738.6 | 50 | 393.4 | 20 | 3.25  | ES+ | 2 |
| 80  | DAG 22:3-22:3 | 742.6 | 50 | 391.3 | 20 | 3.25  | ES+ | 1 |
| 81  | DAG 22:3-22:4 | 740.6 | 50 | 389.3 | 20 | 3.25  | ES+ | 1 |
| 82  | DAG 22:3-22:4 | 740.6 | 50 | 391.3 | 20 | 3.25  | ES+ | 2 |
| 83  | DAG 22:3-22:5 | 738.6 | 50 | 387.3 | 20 | 3.25  | ES+ | 1 |
| 84  | DAG 22:3-22:5 | 738.6 | 50 | 391.3 | 20 | 3.25  | ES+ | 2 |
| 85  | DAG 22:3-22:6 | 736.6 | 50 | 385.3 | 20 | 3.25  | ES+ | 1 |
| 86  | DAG 22:3-22:6 | 736.6 | 50 | 391.3 | 20 | 3.25  | ES+ | 2 |
| 87  | DAG 22:4-22:4 | 738.6 | 50 | 389.3 | 20 | 3.25  | ES+ | 1 |
| 88  | DAG 22:4-22:5 | 736.6 | 50 | 387.3 | 20 | 3.25  | ES+ | 1 |
| 89  | DAG 22:4-22:5 | 736.6 | 50 | 389.3 | 20 | 3.25  | ES+ | 2 |
| 90  | DAG 22:4-22:6 | 734.6 | 50 | 385.3 | 20 | 3.25  | ES+ | 1 |
| 91  | DAG 22:4-22:6 | 734.6 | 50 | 389.3 | 20 | 3.25  | ES+ | 2 |
| 92  | DAG 22:5-22:5 | 734.6 | 50 | 387.3 | 20 | 3.25  | ES+ | 1 |
| 93  | DAG 22:5-22:6 | 732.6 | 50 | 385.3 | 20 | 3.25  | ES+ | 1 |
| 94  | DAG 22:5-22:6 | 732.6 | 50 | 387.3 | 20 | 3.25  | ES+ | 2 |
| 95  | DAG 22:6-22:6 | 730.5 | 50 | 385.3 | 20 | 3.25  | ES+ | 1 |
| 96  | PA 20:3-22:0  | 781.6 | 20 | 305.2 | 40 | 12.43 | ES- | 1 |
| 97  | PA 20:3-22:0  | 781.6 | 20 | 339.2 | 40 | 12.43 | ES- | 2 |
| 98  | PA 20:3-22:1  | 779.6 | 20 | 305.2 | 40 | 12.43 | ES- | 1 |
| 99  | PA 20:3-22:1  | 779.6 | 20 | 337.2 | 40 | 12.43 | ES- | 2 |
| 100 | PA 20:3-22:2  | 777.5 | 20 | 305.2 | 40 | 12.43 | ES- | 1 |
| 101 | PA 20:3-22:2  | 777.5 | 20 | 335.2 | 40 | 12.43 | ES- | 2 |
| 102 | PA 20:3-22:3  | 775.5 | 20 | 305.2 | 40 | 12.43 | ES- | 1 |



|     |              |       |    |       |    |       |     |   |
|-----|--------------|-------|----|-------|----|-------|-----|---|
| 103 | PA 20:3-22:3 | 775.5 | 20 | 333.2 | 40 | 12.43 | ES- | 2 |
| 104 | PA 20:3-22:4 | 773.5 | 20 | 305.2 | 40 | 12.43 | ES- | 1 |
| 105 | PA 20:3-22:4 | 773.5 | 20 | 331.2 | 40 | 12.43 | ES- | 2 |
| 106 | PA 20:3-22:5 | 771.5 | 20 | 305.2 | 40 | 12.43 | ES- | 1 |
| 107 | PA 20:3-22:5 | 771.5 | 20 | 329.2 | 40 | 12.43 | ES- | 2 |
| 108 | PA 20:3-22:6 | 769.5 | 20 | 305.2 | 40 | 12.43 | ES- | 1 |
| 109 | PA 20:3-22:6 | 769.5 | 20 | 327.2 | 40 | 12.43 | ES- | 2 |
| 110 | PA 20:4-20:4 | 743.5 | 20 | 303.2 | 40 | 12.43 | ES- | 1 |
| 111 | PA 20:4-20:5 | 741.5 | 20 | 301.2 | 40 | 12.43 | ES- | 1 |
| 112 | PA 20:4-20:5 | 741.5 | 20 | 303.2 | 40 | 12.43 | ES- | 2 |
| 113 | PA 20:4-22:0 | 779.6 | 20 | 303.2 | 40 | 12.43 | ES- | 1 |
| 114 | PA 20:4-22:0 | 779.6 | 20 | 339.2 | 40 | 12.43 | ES- | 2 |
| 115 | PA 20:4-22:1 | 777.5 | 20 | 303.2 | 40 | 12.43 | ES- | 1 |
| 116 | PA 20:4-22:1 | 777.5 | 20 | 337.2 | 40 | 12.43 | ES- | 2 |
| 117 | PA 20:4-22:2 | 775.5 | 20 | 303.2 | 40 | 12.43 | ES- | 1 |
| 118 | PA 20:4-22:2 | 775.5 | 20 | 335.2 | 40 | 12.43 | ES- | 2 |
| 119 | PA 20:4-22:3 | 773.5 | 20 | 303.2 | 40 | 12.43 | ES- | 1 |
| 120 | PA 20:4-22:3 | 773.5 | 20 | 333.2 | 40 | 12.43 | ES- | 2 |
| 121 | PA 20:4-22:4 | 771.5 | 20 | 303.2 | 40 | 12.43 | ES- | 1 |
| 122 | PA 20:4-22:4 | 771.5 | 20 | 331.2 | 40 | 12.43 | ES- | 2 |
| 123 | PA 20:4-22:5 | 769.5 | 20 | 303.2 | 40 | 12.43 | ES- | 1 |
| 124 | PA 20:4-22:5 | 769.5 | 20 | 329.2 | 40 | 12.43 | ES- | 2 |
| 125 | PA 20:4-22:6 | 767.5 | 20 | 303.2 | 40 | 12.43 | ES- | 1 |
| 126 | PA 20:4-22:6 | 767.5 | 20 | 327.2 | 40 | 12.43 | ES- | 2 |
| 127 | PA 20:5-20:5 | 739.4 | 20 | 301.2 | 40 | 12.43 | ES- | 1 |
| 128 | PA 20:5-22:0 | 777.5 | 20 | 301.2 | 40 | 12.43 | ES- | 1 |
| 129 | PA 20:5-22:0 | 777.5 | 20 | 339.2 | 40 | 12.43 | ES- | 2 |
| 130 | PA 20:5-22:1 | 775.5 | 20 | 301.2 | 40 | 12.43 | ES- | 1 |
| 131 | PA 20:5-22:1 | 775.5 | 20 | 337.2 | 40 | 12.43 | ES- | 2 |
| 132 | PA 20:5-22:2 | 773.5 | 20 | 301.2 | 40 | 12.43 | ES- | 1 |
| 133 | PA 20:5-22:2 | 773.5 | 20 | 335.2 | 40 | 12.43 | ES- | 2 |
| 134 | PA 20:5-22:3 | 771.5 | 20 | 301.2 | 40 | 12.43 | ES- | 1 |
| 135 | PA 20:5-22:3 | 771.5 | 20 | 333.2 | 40 | 12.43 | ES- | 2 |
| 136 | PA 20:5-22:4 | 769.5 | 20 | 301.2 | 40 | 12.43 | ES- | 1 |
| 137 | PA 20:5-22:4 | 769.5 | 20 | 331.2 | 40 | 12.43 | ES- | 2 |

|     |              |       |    |       |    |       |     |   |
|-----|--------------|-------|----|-------|----|-------|-----|---|
| 138 | PA 20:5-22:5 | 767.5 | 20 | 301.2 | 40 | 12.43 | ES- | 1 |
| 139 | PA 20:5-22:5 | 767.5 | 20 | 329.2 | 40 | 12.43 | ES- | 2 |
| 140 | PA 20:5-22:6 | 765.5 | 20 | 301.2 | 40 | 12.43 | ES- | 1 |
| 141 | PA 20:5-22:6 | 765.5 | 20 | 327.2 | 40 | 12.43 | ES- | 2 |
| 142 | PA 22:0-22:0 | 815.7 | 20 | 339.2 | 40 | 12.43 | ES- | 1 |
| 143 | PA 22:0-22:1 | 813.6 | 20 | 337.2 | 40 | 12.43 | ES- | 1 |
| 144 | PA 22:0-22:1 | 813.6 | 20 | 339.2 | 40 | 12.43 | ES- | 2 |
| 145 | PA 22:0-22:2 | 811.6 | 20 | 335.2 | 40 | 12.43 | ES- | 1 |
| 146 | PA 22:0-22:2 | 811.6 | 20 | 339.2 | 40 | 12.43 | ES- | 2 |
| 147 | PA 22:0-22:3 | 809.6 | 20 | 333.2 | 40 | 12.43 | ES- | 1 |
| 148 | PA 22:0-22:3 | 809.6 | 20 | 339.2 | 40 | 12.43 | ES- | 2 |
| 149 | PA 22:0-22:4 | 807.6 | 20 | 331.2 | 40 | 12.43 | ES- | 1 |
| 150 | PA 22:0-22:4 | 807.6 | 20 | 339.2 | 40 | 12.43 | ES- | 2 |
| 151 | PA 22:0-22:5 | 805.6 | 20 | 329.2 | 40 | 12.43 | ES- | 1 |
| 152 | PA 22:0-22:5 | 805.6 | 20 | 339.2 | 40 | 12.43 | ES- | 2 |
| 153 | PA 22:0-22:6 | 803.6 | 20 | 327.2 | 40 | 12.43 | ES- | 1 |
| 154 | PA 22:0-22:6 | 803.6 | 20 | 339.2 | 40 | 12.43 | ES- | 2 |
| 155 | PA 22:1-22:1 | 811.6 | 20 | 337.2 | 40 | 12.43 | ES- | 1 |
| 156 | PA 22:1-22:2 | 809.6 | 20 | 335.2 | 40 | 12.43 | ES- | 1 |
| 157 | PA 22:1-22:2 | 809.6 | 20 | 337.2 | 40 | 12.43 | ES- | 2 |
| 158 | PA 22:1-22:3 | 807.6 | 20 | 333.2 | 40 | 12.43 | ES- | 1 |
| 159 | PA 22:1-22:3 | 807.6 | 20 | 337.2 | 40 | 12.43 | ES- | 2 |
| 160 | PA 22:1-22:4 | 805.6 | 20 | 331.2 | 40 | 12.43 | ES- | 1 |
| 161 | PA 22:1-22:4 | 805.6 | 20 | 337.2 | 40 | 12.43 | ES- | 2 |
| 162 | PA 22:1-22:5 | 803.6 | 20 | 329.2 | 40 | 12.43 | ES- | 1 |
| 163 | PA 22:1-22:5 | 803.6 | 20 | 337.2 | 40 | 12.43 | ES- | 2 |
| 164 | PA 22:1-22:6 | 801.5 | 20 | 327.2 | 40 | 12.43 | ES- | 1 |
| 165 | PA 22:1-22:6 | 801.5 | 20 | 337.2 | 40 | 12.43 | ES- | 2 |
| 166 | PA 22:2-22:2 | 807.6 | 20 | 335.2 | 40 | 12.43 | ES- | 1 |
| 167 | PA 22:2-22:3 | 805.6 | 20 | 333.2 | 40 | 12.43 | ES- | 1 |
| 168 | PA 22:2-22:3 | 805.6 | 20 | 335.2 | 40 | 12.43 | ES- | 2 |
| 169 | PA 22:2-22:4 | 803.6 | 20 | 331.2 | 40 | 12.43 | ES- | 1 |
| 170 | PA 22:2-22:4 | 803.6 | 20 | 335.2 | 40 | 12.43 | ES- | 2 |
| 171 | PA 22:2-22:5 | 801.5 | 20 | 329.2 | 40 | 12.43 | ES- | 1 |
| 172 | PA 22:2-22:5 | 801.5 | 20 | 335.2 | 40 | 12.43 | ES- | 2 |

|     |              |       |    |       |    |       |     |   |
|-----|--------------|-------|----|-------|----|-------|-----|---|
| 173 | PA 22:2-22:6 | 799.5 | 20 | 327.2 | 40 | 12.43 | ES- | 1 |
| 174 | PA 22:2-22:6 | 799.5 | 20 | 335.2 | 40 | 12.43 | ES- | 2 |
| 175 | PA 22:3-22:3 | 803.6 | 20 | 333.2 | 40 | 12.43 | ES- | 1 |
| 176 | PA 22:3-22:4 | 801.5 | 20 | 331.2 | 40 | 12.43 | ES- | 1 |
| 177 | PA 22:3-22:4 | 801.5 | 20 | 333.2 | 40 | 12.43 | ES- | 2 |
| 178 | PA 22:3-22:5 | 799.5 | 20 | 329.2 | 40 | 12.43 | ES- | 1 |
| 179 | PA 22:3-22:5 | 799.5 | 20 | 333.2 | 40 | 12.43 | ES- | 2 |
| 180 | PA 22:3-22:6 | 797.5 | 20 | 327.2 | 40 | 12.43 | ES- | 1 |
| 181 | PA 22:3-22:6 | 797.5 | 20 | 333.2 | 40 | 12.43 | ES- | 2 |
| 182 | PA 22:4-22:4 | 799.5 | 20 | 331.2 | 40 | 12.43 | ES- | 1 |
| 183 | PA 22:4-22:5 | 797.5 | 20 | 329.2 | 40 | 12.43 | ES- | 1 |
| 184 | PA 22:4-22:5 | 797.5 | 20 | 331.2 | 40 | 12.43 | ES- | 2 |
| 185 | PA 22:4-22:6 | 795.5 | 20 | 327.2 | 40 | 12.43 | ES- | 1 |
| 186 | PA 22:4-22:6 | 795.5 | 20 | 331.2 | 40 | 12.43 | ES- | 2 |
| 187 | PA 22:5-22:5 | 795.5 | 20 | 329.2 | 40 | 12.43 | ES- | 1 |
| 188 | PA 22:5-22:6 | 793.5 | 20 | 327.2 | 40 | 12.43 | ES- | 1 |
| 189 | PA 22:5-22:6 | 793.5 | 20 | 329.2 | 40 | 12.43 | ES- | 2 |
| 190 | PA 22:6-22:6 | 791.5 | 20 | 327.2 | 40 | 12.43 | ES- | 1 |

Method 5: PCe and PI (1)

| No | Name          | Precursor | CV (V) | Product | CE (V) | RT setting (min) | IonMode | Ion |
|----|---------------|-----------|--------|---------|--------|------------------|---------|-----|
| 1  | PC 16:0e-12:0 | 664.5     | 20     | 422.3   | 30     | 5.40             | ES+     | 1   |
| 2  | PC 16:0e-12:0 | 664.5     | 20     | 482.4   | 30     | 5.40             | ES+     | 2   |
| 3  | PC 16:0e-14:0 | 692.6     | 20     | 450.3   | 30     | 5.40             | ES+     | 1   |
| 4  | PC 16:0e-14:0 | 692.6     | 20     | 482.4   | 30     | 5.40             | ES+     | 2   |
| 5  | PC 16:0e-14:1 | 690.5     | 20     | 448.3   | 30     | 5.40             | ES+     | 1   |
| 6  | PC 16:0e-14:1 | 690.5     | 20     | 482.4   | 30     | 5.40             | ES+     | 2   |
| 7  | PC 16:0e-16:0 | 720.6     | 20     | 478.3   | 30     | 5.40             | ES+     | 1   |
| 8  | PC 16:0e-16:0 | 720.6     | 20     | 482.4   | 30     | 5.40             | ES+     | 2   |
| 9  | PC 16:0e-16:1 | 718.6     | 20     | 476.3   | 30     | 5.40             | ES+     | 1   |
| 10 | PC 16:0e-16:1 | 718.6     | 20     | 482.4   | 30     | 5.40             | ES+     | 2   |
| 11 | PC 16:0e-18:0 | 748.6     | 20     | 482.4   | 30     | 5.40             | ES+     | 1   |
| 12 | PC 16:0e-18:0 | 748.6     | 20     | 506.3   | 30     | 5.40             | ES+     | 2   |
| 13 | PC 16:0e-18:1 | 746.6     | 20     | 482.4   | 30     | 5.40             | ES+     | 1   |
| 14 | PC 16:0e-18:1 | 746.6     | 20     | 504.3   | 30     | 5.40             | ES+     | 2   |
| 15 | PC 16:0e-18:2 | 744.6     | 20     | 482.4   | 30     | 5.40             | ES+     | 1   |

|    |               |       |    |       |    |      |     |   |
|----|---------------|-------|----|-------|----|------|-----|---|
| 16 | PC 16:0e-18:2 | 744.6 | 20 | 502.3 | 30 | 5.40 | ES+ | 2 |
| 17 | PC 16:0e-18:3 | 742.6 | 20 | 482.4 | 30 | 5.40 | ES+ | 1 |
| 18 | PC 16:0e-18:3 | 742.6 | 20 | 500.3 | 30 | 5.40 | ES+ | 2 |
| 19 | PC 16:0e-18:4 | 740.6 | 20 | 482.4 | 30 | 5.40 | ES+ | 1 |
| 20 | PC 16:0e-18:4 | 740.6 | 20 | 498.3 | 30 | 5.40 | ES+ | 2 |
| 21 | PC 16:0e-20:0 | 776.7 | 20 | 482.4 | 30 | 5.40 | ES+ | 1 |
| 22 | PC 16:0e-20:0 | 776.7 | 20 | 534.3 | 30 | 5.40 | ES+ | 2 |
| 23 | PC 16:0e-20:1 | 774.6 | 20 | 482.4 | 30 | 5.40 | ES+ | 1 |
| 24 | PC 16:0e-20:1 | 774.6 | 20 | 532.3 | 30 | 5.40 | ES+ | 2 |
| 25 | PC 16:0e-20:2 | 772.6 | 20 | 482.4 | 30 | 5.40 | ES+ | 1 |
| 26 | PC 16:0e-20:2 | 772.6 | 20 | 530.3 | 30 | 5.40 | ES+ | 2 |
| 27 | PC 16:0e-20:3 | 770.6 | 20 | 482.4 | 30 | 5.40 | ES+ | 1 |
| 28 | PC 16:0e-20:3 | 770.6 | 20 | 528.3 | 30 | 5.40 | ES+ | 2 |
| 29 | PC 16:0e-20:4 | 768.6 | 20 | 482.4 | 30 | 5.40 | ES+ | 1 |
| 30 | PC 16:0e-20:4 | 768.6 | 20 | 526.3 | 30 | 5.40 | ES+ | 2 |
| 31 | PC 16:0e-20:5 | 766.6 | 20 | 482.4 | 30 | 5.40 | ES+ | 1 |
| 32 | PC 16:0e-20:5 | 766.6 | 20 | 524.3 | 30 | 5.40 | ES+ | 2 |
| 33 | PC 16:0e-22:0 | 804.7 | 20 | 482.4 | 30 | 5.40 | ES+ | 1 |
| 34 | PC 16:0e-22:0 | 804.7 | 20 | 562.3 | 30 | 5.40 | ES+ | 2 |
| 35 | PC 16:0e-22:1 | 802.7 | 20 | 482.4 | 30 | 5.40 | ES+ | 1 |
| 36 | PC 16:0e-22:1 | 802.7 | 20 | 560.3 | 30 | 5.40 | ES+ | 2 |
| 37 | PC 16:0e-22:2 | 800.7 | 20 | 482.4 | 30 | 5.40 | ES+ | 1 |
| 38 | PC 16:0e-22:2 | 800.7 | 20 | 558.3 | 30 | 5.40 | ES+ | 2 |
| 39 | PC 16:0e-22:3 | 798.6 | 20 | 482.4 | 30 | 5.40 | ES+ | 1 |
| 40 | PC 16:0e-22:3 | 798.6 | 20 | 556.3 | 30 | 5.40 | ES+ | 2 |
| 41 | PC 16:0e-22:4 | 796.6 | 20 | 482.4 | 30 | 5.40 | ES+ | 1 |
| 42 | PC 16:0e-22:4 | 796.6 | 20 | 554.3 | 30 | 5.40 | ES+ | 2 |
| 43 | PC 16:0e-22:5 | 794.6 | 20 | 482.4 | 30 | 5.40 | ES+ | 1 |
| 44 | PC 16:0e-22:5 | 794.6 | 20 | 552.3 | 30 | 5.40 | ES+ | 2 |
| 45 | PC 16:0e-22:6 | 792.6 | 20 | 482.4 | 30 | 5.40 | ES+ | 1 |
| 46 | PC 16:0e-22:6 | 792.6 | 20 | 550.3 | 30 | 5.40 | ES+ | 2 |
| 47 | PC 16:1e-12:0 | 662.5 | 20 | 422.3 | 30 | 5.40 | ES+ | 1 |
| 48 | PC 16:1e-12:0 | 662.5 | 20 | 480.4 | 30 | 5.40 | ES+ | 2 |
| 49 | PC 16:1e-14:0 | 690.5 | 20 | 450.3 | 30 | 5.40 | ES+ | 1 |
| 50 | PC 16:1e-14:0 | 690.5 | 20 | 480.4 | 30 | 5.40 | ES+ | 2 |

|    |               |       |    |       |    |      |     |   |
|----|---------------|-------|----|-------|----|------|-----|---|
| 51 | PC 16:1e-14:1 | 688.5 | 20 | 448.3 | 30 | 5.40 | ES+ | 1 |
| 52 | PC 16:1e-14:1 | 688.5 | 20 | 480.4 | 30 | 5.40 | ES+ | 2 |
| 53 | PC 16:1e-16:0 | 718.6 | 20 | 478.3 | 30 | 5.40 | ES+ | 1 |
| 54 | PC 16:1e-16:0 | 718.6 | 20 | 480.4 | 30 | 5.40 | ES+ | 2 |
| 55 | PC 16:1e-16:1 | 716.6 | 20 | 476.3 | 30 | 5.40 | ES+ | 1 |
| 56 | PC 16:1e-16:1 | 716.6 | 20 | 480.4 | 30 | 5.40 | ES+ | 2 |
| 57 | PC 16:1e-18:0 | 746.6 | 20 | 480.4 | 30 | 5.40 | ES+ | 1 |
| 58 | PC 16:1e-18:0 | 746.6 | 20 | 506.3 | 30 | 5.40 | ES+ | 2 |
| 59 | PC 16:1e-18:1 | 744.6 | 20 | 480.4 | 30 | 5.40 | ES+ | 1 |
| 60 | PC 16:1e-18:1 | 744.6 | 20 | 504.3 | 30 | 5.40 | ES+ | 2 |
| 61 | PC 16:1e-18:2 | 742.6 | 20 | 480.4 | 30 | 5.40 | ES+ | 1 |
| 62 | PC 16:1e-18:2 | 742.6 | 20 | 502.3 | 30 | 5.40 | ES+ | 2 |
| 63 | PC 16:1e-18:3 | 740.6 | 20 | 480.4 | 30 | 5.40 | ES+ | 1 |
| 64 | PC 16:1e-18:3 | 740.6 | 20 | 500.3 | 30 | 5.40 | ES+ | 2 |
| 65 | PC 16:1e-18:4 | 738.5 | 20 | 480.4 | 30 | 5.40 | ES+ | 1 |
| 66 | PC 16:1e-18:4 | 738.5 | 20 | 498.3 | 30 | 5.40 | ES+ | 2 |
| 67 | PC 16:1e-20:0 | 774.6 | 20 | 480.4 | 30 | 5.40 | ES+ | 1 |
| 68 | PC 16:1e-20:0 | 774.6 | 20 | 534.3 | 30 | 5.40 | ES+ | 2 |
| 69 | PC 16:1e-20:1 | 772.6 | 20 | 480.4 | 30 | 5.40 | ES+ | 1 |
| 70 | PC 16:1e-20:1 | 772.6 | 20 | 532.3 | 30 | 5.40 | ES+ | 2 |
| 71 | PC 16:1e-20:2 | 770.6 | 20 | 480.4 | 30 | 5.40 | ES+ | 1 |
| 72 | PC 16:1e-20:2 | 770.6 | 20 | 530.3 | 30 | 5.40 | ES+ | 2 |
| 73 | PC 16:1e-20:3 | 768.6 | 20 | 480.4 | 30 | 5.40 | ES+ | 1 |
| 74 | PC 16:1e-20:3 | 768.6 | 20 | 528.3 | 30 | 5.40 | ES+ | 2 |
| 75 | PC 16:1e-20:4 | 766.6 | 20 | 480.4 | 30 | 5.40 | ES+ | 1 |
| 76 | PC 16:1e-20:4 | 766.6 | 20 | 526.3 | 30 | 5.40 | ES+ | 2 |
| 77 | PC 16:1e-20:5 | 764.6 | 20 | 480.4 | 30 | 5.40 | ES+ | 1 |
| 78 | PC 16:1e-20:5 | 764.6 | 20 | 524.3 | 30 | 5.40 | ES+ | 2 |
| 79 | PC 16:1e-22:0 | 802.7 | 20 | 480.4 | 30 | 5.40 | ES+ | 1 |
| 80 | PC 16:1e-22:0 | 802.7 | 20 | 562.3 | 30 | 5.40 | ES+ | 2 |
| 81 | PC 16:1e-22:1 | 800.7 | 20 | 480.4 | 30 | 5.40 | ES+ | 1 |
| 82 | PC 16:1e-22:1 | 800.7 | 20 | 560.3 | 30 | 5.40 | ES+ | 2 |
| 83 | PC 16:1e-22:2 | 798.6 | 20 | 480.4 | 30 | 5.40 | ES+ | 1 |
| 84 | PC 16:1e-22:2 | 798.6 | 20 | 558.3 | 30 | 5.40 | ES+ | 2 |
| 85 | PC 16:1e-22:3 | 796.6 | 20 | 480.4 | 30 | 5.40 | ES+ | 1 |

|     |               |       |    |       |    |       |     |   |
|-----|---------------|-------|----|-------|----|-------|-----|---|
| 86  | PC 16:1e-22:3 | 796.6 | 20 | 556.3 | 30 | 5.40  | ES+ | 2 |
| 87  | PC 16:1e-22:4 | 794.6 | 20 | 480.4 | 30 | 5.40  | ES+ | 1 |
| 88  | PC 16:1e-22:4 | 794.6 | 20 | 554.3 | 30 | 5.40  | ES+ | 2 |
| 89  | PC 16:1e-22:5 | 792.6 | 20 | 480.4 | 30 | 5.40  | ES+ | 1 |
| 90  | PC 16:1e-22:5 | 792.6 | 20 | 552.3 | 30 | 5.40  | ES+ | 2 |
| 91  | PC 16:1e-22:6 | 790.6 | 20 | 480.4 | 30 | 5.40  | ES+ | 1 |
| 92  | PC 16:1e-22:6 | 790.6 | 20 | 550.3 | 30 | 5.40  | ES+ | 2 |
| 93  | PI 12:0-12:0  | 697.4 | 50 | 199.3 | 50 | 12.06 | ES- | 1 |
| 94  | PI 12:0-14:0  | 725.4 | 50 | 199.3 | 50 | 12.06 | ES- | 1 |
| 95  | PI 12:0-14:0  | 725.4 | 50 | 227.3 | 50 | 12.06 | ES- | 2 |
| 96  | PI 12:0-14:1  | 723.4 | 50 | 199.3 | 50 | 12.06 | ES- | 1 |
| 97  | PI 12:0-14:1  | 723.4 | 50 | 225.3 | 50 | 12.06 | ES- | 2 |
| 98  | PI 12:0-16:0  | 753.5 | 50 | 199.3 | 50 | 12.06 | ES- | 1 |
| 99  | PI 12:0-16:0  | 753.5 | 50 | 255.3 | 50 | 12.06 | ES- | 2 |
| 100 | PI 12:0-16:1  | 751.4 | 50 | 199.3 | 50 | 12.06 | ES- | 1 |
| 101 | PI 12:0-16:1  | 751.4 | 50 | 253.3 | 50 | 12.06 | ES- | 2 |
| 102 | PI 12:0-18:0  | 781.5 | 50 | 199.3 | 50 | 12.06 | ES- | 1 |
| 103 | PI 12:0-18:0  | 781.5 | 50 | 283.3 | 50 | 12.06 | ES- | 2 |
| 104 | PI 12:0-18:1  | 779.5 | 50 | 199.3 | 50 | 12.06 | ES- | 1 |
| 105 | PI 12:0-18:1  | 779.5 | 50 | 281.3 | 50 | 12.06 | ES- | 2 |
| 106 | PI 12:0-18:2  | 777.5 | 50 | 199.3 | 50 | 12.06 | ES- | 1 |
| 107 | PI 12:0-18:2  | 777.5 | 50 | 279.3 | 50 | 12.06 | ES- | 2 |
| 108 | PI 12:0-18:3  | 775.4 | 50 | 199.3 | 50 | 12.06 | ES- | 1 |
| 109 | PI 12:0-18:3  | 775.4 | 50 | 277.3 | 50 | 12.06 | ES- | 2 |
| 110 | PI 12:0-18:4  | 773.4 | 50 | 199.3 | 50 | 12.06 | ES- | 1 |
| 111 | PI 12:0-18:4  | 773.4 | 50 | 275.3 | 50 | 12.06 | ES- | 2 |
| 112 | PI 12:0-20:0  | 809.5 | 50 | 199.3 | 50 | 12.06 | ES- | 1 |
| 113 | PI 12:0-20:0  | 809.5 | 50 | 311.2 | 50 | 12.06 | ES- | 2 |
| 114 | PI 12:0-20:1  | 807.5 | 50 | 199.3 | 50 | 12.06 | ES- | 1 |
| 115 | PI 12:0-20:1  | 807.5 | 50 | 309.2 | 50 | 12.06 | ES- | 2 |
| 116 | PI 12:0-20:2  | 805.5 | 50 | 199.3 | 50 | 12.06 | ES- | 1 |
| 117 | PI 12:0-20:2  | 805.5 | 50 | 307.2 | 50 | 12.06 | ES- | 2 |
| 118 | PI 12:0-20:3  | 803.5 | 50 | 199.3 | 50 | 12.06 | ES- | 1 |
| 119 | PI 12:0-20:3  | 803.5 | 50 | 305.2 | 50 | 12.06 | ES- | 2 |
| 120 | PI 12:0-20:4  | 801.5 | 50 | 199.3 | 50 | 12.06 | ES- | 1 |

|     |              |       |    |       |    |       |     |   |
|-----|--------------|-------|----|-------|----|-------|-----|---|
| 121 | PI 12:0-20:4 | 801.5 | 50 | 303.2 | 50 | 12.06 | ES- | 2 |
| 122 | PI 12:0-20:5 | 799.4 | 50 | 199.3 | 50 | 12.06 | ES- | 1 |
| 123 | PI 12:0-20:5 | 799.4 | 50 | 301.2 | 50 | 12.06 | ES- | 2 |
| 124 | PI 12:0-22:0 | 837.5 | 50 | 199.3 | 50 | 12.06 | ES- | 1 |
| 125 | PI 12:0-22:0 | 837.5 | 50 | 339.2 | 50 | 12.06 | ES- | 2 |
| 126 | PI 12:0-22:1 | 835.5 | 50 | 199.3 | 50 | 12.06 | ES- | 1 |
| 127 | PI 12:0-22:1 | 835.5 | 50 | 337.2 | 50 | 12.06 | ES- | 2 |
| 128 | PI 12:0-22:2 | 833.5 | 50 | 199.3 | 50 | 12.06 | ES- | 1 |
| 129 | PI 12:0-22:2 | 833.5 | 50 | 335.2 | 50 | 12.06 | ES- | 2 |
| 130 | PI 12:0-22:3 | 831.5 | 50 | 199.3 | 50 | 12.06 | ES- | 1 |
| 131 | PI 12:0-22:3 | 831.5 | 50 | 333.2 | 50 | 12.06 | ES- | 2 |
| 132 | PI 12:0-22:4 | 829.5 | 50 | 199.3 | 50 | 12.06 | ES- | 1 |
| 133 | PI 12:0-22:4 | 829.5 | 50 | 331.2 | 50 | 12.06 | ES- | 2 |
| 134 | PI 12:0-22:5 | 827.5 | 50 | 199.3 | 50 | 12.06 | ES- | 1 |
| 135 | PI 12:0-22:5 | 827.5 | 50 | 329.2 | 50 | 12.06 | ES- | 2 |
| 136 | PI 12:0-22:6 | 825.5 | 50 | 199.3 | 50 | 12.06 | ES- | 1 |
| 137 | PI 12:0-22:6 | 825.5 | 50 | 327.2 | 50 | 12.06 | ES- | 2 |
| 138 | PI 14:0-14:0 | 753.5 | 50 | 227.3 | 50 | 12.06 | ES- | 1 |
| 139 | PI 14:0-14:1 | 751.4 | 50 | 225.3 | 50 | 12.06 | ES- | 1 |
| 140 | PI 14:0-14:1 | 751.4 | 50 | 227.3 | 50 | 12.06 | ES- | 2 |
| 141 | PI 14:0-16:0 | 781.5 | 50 | 227.3 | 50 | 12.06 | ES- | 1 |
| 142 | PI 14:0-16:0 | 781.5 | 50 | 255.3 | 50 | 12.06 | ES- | 2 |
| 143 | PI 14:0-16:1 | 779.5 | 50 | 227.3 | 50 | 12.06 | ES- | 1 |
| 144 | PI 14:0-16:1 | 779.5 | 50 | 253.3 | 50 | 12.06 | ES- | 2 |
| 145 | PI 14:0-18:0 | 809.5 | 50 | 227.3 | 50 | 12.06 | ES- | 1 |
| 146 | PI 14:0-18:0 | 809.5 | 50 | 283.3 | 50 | 12.06 | ES- | 2 |
| 147 | PI 14:0-18:1 | 807.5 | 50 | 227.3 | 50 | 12.06 | ES- | 1 |
| 148 | PI 14:0-18:1 | 807.5 | 50 | 281.3 | 50 | 12.06 | ES- | 2 |
| 149 | PI 14:0-18:2 | 805.5 | 50 | 227.3 | 50 | 12.06 | ES- | 1 |
| 150 | PI 14:0-18:2 | 805.5 | 50 | 279.3 | 50 | 12.06 | ES- | 2 |
| 151 | PI 14:0-18:3 | 803.5 | 50 | 227.3 | 50 | 12.06 | ES- | 1 |
| 152 | PI 14:0-18:3 | 803.5 | 50 | 277.3 | 50 | 12.06 | ES- | 2 |
| 153 | PI 14:0-18:4 | 801.5 | 50 | 227.3 | 50 | 12.06 | ES- | 1 |
| 154 | PI 14:0-18:4 | 801.5 | 50 | 275.3 | 50 | 12.06 | ES- | 2 |
| 155 | PI 14:0-20:0 | 837.5 | 50 | 227.3 | 50 | 12.06 | ES- | 1 |

|     |              |       |    |       |    |       |     |   |
|-----|--------------|-------|----|-------|----|-------|-----|---|
| 156 | PI 14:0-20:0 | 837.5 | 50 | 311.2 | 50 | 12.06 | ES- | 2 |
| 157 | PI 14:0-20:1 | 835.5 | 50 | 227.3 | 50 | 12.06 | ES- | 1 |
| 158 | PI 14:0-20:1 | 835.5 | 50 | 309.2 | 50 | 12.06 | ES- | 2 |
| 159 | PI 14:0-20:2 | 833.5 | 50 | 227.3 | 50 | 12.06 | ES- | 1 |
| 160 | PI 14:0-20:2 | 833.5 | 50 | 307.2 | 50 | 12.06 | ES- | 2 |
| 161 | PI 14:0-20:3 | 831.5 | 50 | 227.3 | 50 | 12.06 | ES- | 1 |
| 162 | PI 14:0-20:3 | 831.5 | 50 | 305.2 | 50 | 12.06 | ES- | 2 |
| 163 | PI 14:0-20:4 | 829.5 | 50 | 227.3 | 50 | 12.06 | ES- | 1 |
| 164 | PI 14:0-20:4 | 829.5 | 50 | 303.2 | 50 | 12.06 | ES- | 2 |
| 165 | PI 14:0-20:5 | 827.5 | 50 | 227.3 | 50 | 12.06 | ES- | 1 |
| 166 | PI 14:0-20:5 | 827.5 | 50 | 301.2 | 50 | 12.06 | ES- | 2 |
| 167 | PI 14:0-22:0 | 865.6 | 50 | 227.3 | 50 | 12.06 | ES- | 1 |
| 168 | PI 14:0-22:0 | 865.6 | 50 | 339.2 | 50 | 12.06 | ES- | 2 |
| 169 | PI 14:0-22:1 | 863.6 | 50 | 227.3 | 50 | 12.06 | ES- | 1 |
| 170 | PI 14:0-22:1 | 863.6 | 50 | 337.2 | 50 | 12.06 | ES- | 2 |
| 171 | PI 14:0-22:2 | 861.5 | 50 | 227.3 | 50 | 12.06 | ES- | 1 |
| 172 | PI 14:0-22:2 | 861.5 | 50 | 335.2 | 50 | 12.06 | ES- | 2 |
| 173 | PI 14:0-22:3 | 859.5 | 50 | 227.3 | 50 | 12.06 | ES- | 1 |
| 174 | PI 14:0-22:3 | 859.5 | 50 | 333.2 | 50 | 12.06 | ES- | 2 |
| 175 | PI 14:0-22:4 | 857.5 | 50 | 227.3 | 50 | 12.06 | ES- | 1 |
| 176 | PI 14:0-22:4 | 857.5 | 50 | 331.2 | 50 | 12.06 | ES- | 2 |
| 177 | PI 14:0-22:5 | 855.5 | 50 | 227.3 | 50 | 12.06 | ES- | 1 |
| 178 | PI 14:0-22:5 | 855.5 | 50 | 329.2 | 50 | 12.06 | ES- | 2 |
| 179 | PI 14:0-22:6 | 853.5 | 50 | 227.3 | 50 | 12.06 | ES- | 1 |
| 180 | PI 14:0-22:6 | 853.5 | 50 | 327.2 | 50 | 12.06 | ES- | 2 |
| 181 | PI 14:1-14:1 | 749.4 | 50 | 225.3 | 50 | 12.06 | ES- | 1 |
| 182 | PI 14:1-16:0 | 779.5 | 50 | 225.3 | 50 | 12.06 | ES- | 1 |
| 183 | PI 14:1-16:0 | 779.5 | 50 | 255.3 | 50 | 12.06 | ES- | 2 |
| 184 | PI 14:1-16:1 | 777.5 | 50 | 225.3 | 50 | 12.06 | ES- | 1 |
| 185 | PI 14:1-16:1 | 777.5 | 50 | 253.3 | 50 | 12.06 | ES- | 2 |
| 186 | PI 14:1-18:0 | 807.5 | 50 | 225.3 | 50 | 12.06 | ES- | 1 |
| 187 | PI 14:1-18:0 | 807.5 | 50 | 283.3 | 50 | 12.06 | ES- | 2 |
| 188 | PI 14:1-18:1 | 805.5 | 50 | 225.3 | 50 | 12.06 | ES- | 1 |
| 189 | PI 14:1-18:1 | 805.5 | 50 | 281.3 | 50 | 12.06 | ES- | 2 |
| 190 | PI 14:1-18:2 | 803.5 | 50 | 225.3 | 50 | 12.06 | ES- | 1 |



|     |              |       |    |       |    |       |     |   |
|-----|--------------|-------|----|-------|----|-------|-----|---|
| 191 | PI 14:1-18:2 | 803.5 | 50 | 279.3 | 50 | 12.06 | ES- | 2 |
| 192 | PI 14:1-18:3 | 801.5 | 50 | 225.3 | 50 | 12.06 | ES- | 1 |
| 193 | PI 14:1-18:3 | 801.5 | 50 | 277.3 | 50 | 12.06 | ES- | 2 |
| 194 | PI 14:1-18:4 | 799.4 | 50 | 225.3 | 50 | 12.06 | ES- | 1 |
| 195 | PI 14:1-18:4 | 799.4 | 50 | 275.3 | 50 | 12.06 | ES- | 2 |
| 196 | PI 14:1-20:0 | 835.5 | 50 | 225.3 | 50 | 12.06 | ES- | 1 |
| 197 | PI 14:1-20:0 | 835.5 | 50 | 311.2 | 50 | 12.06 | ES- | 2 |
| 198 | PI 14:1-20:1 | 833.5 | 50 | 225.3 | 50 | 12.06 | ES- | 1 |
| 199 | PI 14:1-20:1 | 833.5 | 50 | 309.2 | 50 | 12.06 | ES- | 2 |
| 200 | PI 14:1-20:2 | 831.5 | 50 | 225.3 | 50 | 12.06 | ES- | 1 |
| 201 | PI 14:1-20:2 | 831.5 | 50 | 307.2 | 50 | 12.06 | ES- | 2 |
| 202 | PI 14:1-20:3 | 829.5 | 50 | 225.3 | 50 | 12.06 | ES- | 1 |
| 203 | PI 14:1-20:3 | 829.5 | 50 | 305.2 | 50 | 12.06 | ES- | 2 |
| 204 | PI 14:1-20:4 | 827.5 | 50 | 225.3 | 50 | 12.06 | ES- | 1 |
| 205 | PI 14:1-20:4 | 827.5 | 50 | 303.2 | 50 | 12.06 | ES- | 2 |
| 206 | PI 14:1-20:5 | 825.5 | 50 | 225.3 | 50 | 12.06 | ES- | 1 |
| 207 | PI 14:1-20:5 | 825.5 | 50 | 301.2 | 50 | 12.06 | ES- | 2 |
| 208 | PI 14:1-22:0 | 863.6 | 50 | 225.3 | 50 | 12.06 | ES- | 1 |
| 209 | PI 14:1-22:0 | 863.6 | 50 | 339.2 | 50 | 12.06 | ES- | 2 |
| 210 | PI 14:1-22:1 | 861.5 | 50 | 225.3 | 50 | 12.06 | ES- | 1 |
| 211 | PI 14:1-22:1 | 861.5 | 50 | 337.2 | 50 | 12.06 | ES- | 2 |
| 212 | PI 14:1-22:2 | 859.5 | 50 | 225.3 | 50 | 12.06 | ES- | 1 |
| 213 | PI 14:1-22:2 | 859.5 | 50 | 335.2 | 50 | 12.06 | ES- | 2 |
| 214 | PI 14:1-22:3 | 857.5 | 50 | 225.3 | 50 | 12.06 | ES- | 1 |
| 215 | PI 14:1-22:3 | 857.5 | 50 | 333.2 | 50 | 12.06 | ES- | 2 |
| 216 | PI 14:1-22:4 | 855.5 | 50 | 225.3 | 50 | 12.06 | ES- | 1 |
| 217 | PI 14:1-22:4 | 855.5 | 50 | 331.2 | 50 | 12.06 | ES- | 2 |
| 218 | PI 14:1-22:5 | 853.5 | 50 | 225.3 | 50 | 12.06 | ES- | 1 |
| 219 | PI 14:1-22:5 | 853.5 | 50 | 329.2 | 50 | 12.06 | ES- | 2 |
| 220 | PI 14:1-22:6 | 851.5 | 50 | 225.3 | 50 | 12.06 | ES- | 1 |
| 221 | PI 14:1-22:6 | 851.5 | 50 | 327.2 | 50 | 12.06 | ES- | 2 |
| 222 | PI 16:0-16:0 | 809.5 | 50 | 255.3 | 50 | 12.06 | ES- | 1 |
| 223 | PI 16:0-16:1 | 807.5 | 50 | 253.3 | 50 | 12.06 | ES- | 1 |
| 224 | PI 16:0-16:1 | 807.5 | 50 | 255.3 | 50 | 12.06 | ES- | 2 |
| 225 | PI 16:0-18:0 | 837.5 | 50 | 255.3 | 50 | 12.06 | ES- | 1 |

|     |              |       |    |       |    |       |     |   |
|-----|--------------|-------|----|-------|----|-------|-----|---|
| 226 | PI 16:0-18:0 | 837.5 | 50 | 283.3 | 50 | 12.06 | ES- | 2 |
| 227 | PI 16:0-18:1 | 835.5 | 50 | 255.3 | 50 | 12.06 | ES- | 1 |
| 228 | PI 16:0-18:1 | 835.5 | 50 | 281.3 | 50 | 12.06 | ES- | 2 |
| 229 | PI 16:0-18:2 | 833.5 | 50 | 255.3 | 50 | 12.06 | ES- | 1 |
| 230 | PI 16:0-18:2 | 833.5 | 50 | 279.3 | 50 | 12.06 | ES- | 2 |
| 231 | PI 16:0-18:3 | 831.5 | 50 | 255.3 | 50 | 12.06 | ES- | 1 |
| 232 | PI 16:0-18:3 | 831.5 | 50 | 277.3 | 50 | 12.06 | ES- | 2 |
| 233 | PI 16:0-18:4 | 829.5 | 50 | 255.3 | 50 | 12.06 | ES- | 1 |
| 234 | PI 16:0-18:4 | 829.5 | 50 | 275.3 | 50 | 12.06 | ES- | 2 |

Method 6: PCe and PI (2)

| No | Name          | Precursor | CV (V) | Product | CE (V) | RT setting (min) | IonMode | Ion |
|----|---------------|-----------|--------|---------|--------|------------------|---------|-----|
| 1  | PC 18:0e-12:0 | 692.6     | 20     | 422.3   | 30     | 5.40             | ES+     | 1   |
| 2  | PC 18:0e-12:0 | 692.6     | 20     | 510.4   | 30     | 5.40             | ES+     | 2   |
| 3  | PC 18:0e-14:0 | 720.6     | 20     | 450.3   | 30     | 5.40             | ES+     | 1   |
| 4  | PC 18:0e-14:0 | 720.6     | 20     | 510.4   | 30     | 5.40             | ES+     | 2   |
| 5  | PC 18:0e-14:1 | 718.6     | 20     | 448.3   | 30     | 5.40             | ES+     | 1   |
| 6  | PC 18:0e-14:1 | 718.6     | 20     | 510.4   | 30     | 5.40             | ES+     | 2   |
| 7  | PC 18:0e-16:0 | 748.6     | 20     | 478.3   | 30     | 5.40             | ES+     | 1   |
| 8  | PC 18:0e-16:0 | 748.6     | 20     | 510.4   | 30     | 5.40             | ES+     | 2   |
| 9  | PC 18:0e-16:1 | 746.6     | 20     | 476.3   | 30     | 5.40             | ES+     | 1   |
| 10 | PC 18:0e-16:1 | 746.6     | 20     | 510.4   | 30     | 5.40             | ES+     | 2   |
| 11 | PC 18:0e-18:0 | 776.7     | 20     | 506.3   | 30     | 5.40             | ES+     | 1   |
| 12 | PC 18:0e-18:0 | 776.7     | 20     | 510.4   | 30     | 5.40             | ES+     | 2   |
| 13 | PC 18:0e-18:1 | 774.6     | 20     | 504.3   | 30     | 5.40             | ES+     | 1   |
| 14 | PC 18:0e-18:1 | 774.6     | 20     | 510.4   | 30     | 5.40             | ES+     | 2   |
| 15 | PC 18:0e-18:2 | 772.6     | 20     | 502.3   | 30     | 5.40             | ES+     | 1   |
| 16 | PC 18:0e-18:2 | 772.6     | 20     | 510.4   | 30     | 5.40             | ES+     | 2   |
| 17 | PC 18:0e-18:3 | 770.6     | 20     | 500.3   | 30     | 5.40             | ES+     | 1   |
| 18 | PC 18:0e-18:3 | 770.6     | 20     | 510.4   | 30     | 5.40             | ES+     | 2   |
| 19 | PC 18:0e-18:4 | 768.6     | 20     | 498.3   | 30     | 5.40             | ES+     | 1   |
| 20 | PC 18:0e-18:4 | 768.6     | 20     | 510.4   | 30     | 5.40             | ES+     | 2   |
| 21 | PC 18:0e-20:0 | 804.7     | 20     | 510.4   | 30     | 5.40             | ES+     | 1   |
| 22 | PC 18:0e-20:0 | 804.7     | 20     | 534.3   | 30     | 5.40             | ES+     | 2   |
| 23 | PC 18:0e-20:1 | 802.7     | 20     | 510.4   | 30     | 5.40             | ES+     | 1   |
| 24 | PC 18:0e-20:1 | 802.7     | 20     | 532.3   | 30     | 5.40             | ES+     | 2   |

|    |               |       |    |       |    |      |     |   |
|----|---------------|-------|----|-------|----|------|-----|---|
| 25 | PC 18:0e-20:2 | 800.7 | 20 | 510.4 | 30 | 5.40 | ES+ | 1 |
| 26 | PC 18:0e-20:2 | 800.7 | 20 | 530.3 | 30 | 5.40 | ES+ | 2 |
| 27 | PC 18:0e-20:3 | 798.6 | 20 | 510.4 | 30 | 5.40 | ES+ | 1 |
| 28 | PC 18:0e-20:3 | 798.6 | 20 | 528.3 | 30 | 5.40 | ES+ | 2 |
| 29 | PC 18:0e-20:4 | 796.6 | 20 | 510.4 | 30 | 5.40 | ES+ | 1 |
| 30 | PC 18:0e-20:4 | 796.6 | 20 | 526.3 | 30 | 5.40 | ES+ | 2 |
| 31 | PC 18:0e-20:5 | 794.6 | 20 | 510.4 | 30 | 5.40 | ES+ | 1 |
| 32 | PC 18:0e-20:5 | 794.6 | 20 | 524.3 | 30 | 5.40 | ES+ | 2 |
| 33 | PC 18:0e-22:0 | 832.7 | 20 | 510.4 | 30 | 5.40 | ES+ | 1 |
| 34 | PC 18:0e-22:0 | 832.7 | 20 | 562.3 | 30 | 5.40 | ES+ | 2 |
| 35 | PC 18:0e-22:1 | 830.7 | 20 | 510.4 | 30 | 5.40 | ES+ | 1 |
| 36 | PC 18:0e-22:1 | 830.7 | 20 | 560.3 | 30 | 5.40 | ES+ | 2 |
| 37 | PC 18:0e-22:2 | 828.7 | 20 | 510.4 | 30 | 5.40 | ES+ | 1 |
| 38 | PC 18:0e-22:2 | 828.7 | 20 | 558.3 | 30 | 5.40 | ES+ | 2 |
| 39 | PC 18:0e-22:3 | 826.7 | 20 | 510.4 | 30 | 5.40 | ES+ | 1 |
| 40 | PC 18:0e-22:3 | 826.7 | 20 | 556.3 | 30 | 5.40 | ES+ | 2 |
| 41 | PC 18:0e-22:4 | 824.7 | 20 | 510.4 | 30 | 5.40 | ES+ | 1 |
| 42 | PC 18:0e-22:4 | 824.7 | 20 | 554.3 | 30 | 5.40 | ES+ | 2 |
| 43 | PC 18:0e-22:5 | 822.6 | 20 | 510.4 | 30 | 5.40 | ES+ | 1 |
| 44 | PC 18:0e-22:5 | 822.6 | 20 | 552.3 | 30 | 5.40 | ES+ | 2 |
| 45 | PC 18:0e-22:6 | 820.6 | 20 | 510.4 | 30 | 5.40 | ES+ | 1 |
| 46 | PC 18:0e-22:6 | 820.6 | 20 | 550.3 | 30 | 5.40 | ES+ | 2 |
| 47 | PC 18:1e-12:0 | 690.5 | 20 | 422.3 | 30 | 5.40 | ES+ | 1 |
| 48 | PC 18:1e-12:0 | 690.5 | 20 | 508.4 | 30 | 5.40 | ES+ | 2 |
| 49 | PC 18:1e-14:0 | 718.6 | 20 | 450.3 | 30 | 5.40 | ES+ | 1 |
| 50 | PC 18:1e-14:0 | 718.6 | 20 | 508.4 | 30 | 5.40 | ES+ | 2 |
| 51 | PC 18:1e-14:1 | 716.6 | 20 | 448.3 | 30 | 5.40 | ES+ | 1 |
| 52 | PC 18:1e-14:1 | 716.6 | 20 | 508.4 | 30 | 5.40 | ES+ | 2 |
| 53 | PC 18:1e-16:0 | 746.6 | 20 | 478.3 | 30 | 5.40 | ES+ | 1 |
| 54 | PC 18:1e-16:0 | 746.6 | 20 | 508.4 | 30 | 5.40 | ES+ | 2 |
| 55 | PC 18:1e-16:1 | 744.6 | 20 | 476.3 | 30 | 5.40 | ES+ | 1 |
| 56 | PC 18:1e-16:1 | 744.6 | 20 | 508.4 | 30 | 5.40 | ES+ | 2 |
| 57 | PC 18:1e-18:0 | 774.6 | 20 | 506.3 | 30 | 5.40 | ES+ | 1 |
| 58 | PC 18:1e-18:0 | 774.6 | 20 | 508.4 | 30 | 5.40 | ES+ | 2 |
| 59 | PC 18:1e-18:1 | 772.6 | 20 | 504.3 | 30 | 5.40 | ES+ | 1 |

|    |               |       |    |       |    |       |     |   |
|----|---------------|-------|----|-------|----|-------|-----|---|
| 60 | PC 18:1e-18:1 | 772.6 | 20 | 508.4 | 30 | 5.40  | ES+ | 2 |
| 61 | PC 18:1e-18:2 | 770.6 | 20 | 502.3 | 30 | 5.40  | ES+ | 1 |
| 62 | PC 18:1e-18:2 | 770.6 | 20 | 508.4 | 30 | 5.40  | ES+ | 2 |
| 63 | PC 18:1e-18:3 | 768.6 | 20 | 500.3 | 30 | 5.40  | ES+ | 1 |
| 64 | PC 18:1e-18:3 | 768.6 | 20 | 508.4 | 30 | 5.40  | ES+ | 2 |
| 65 | PC 18:1e-18:4 | 766.6 | 20 | 498.3 | 30 | 5.40  | ES+ | 1 |
| 66 | PC 18:1e-18:4 | 766.6 | 20 | 508.4 | 30 | 5.40  | ES+ | 2 |
| 67 | PC 18:1e-20:0 | 802.7 | 20 | 508.4 | 30 | 5.40  | ES+ | 1 |
| 68 | PC 18:1e-20:0 | 802.7 | 20 | 534.3 | 30 | 5.40  | ES+ | 2 |
| 69 | PC 18:1e-20:1 | 800.7 | 20 | 508.4 | 30 | 5.40  | ES+ | 1 |
| 70 | PC 18:1e-20:1 | 800.7 | 20 | 532.3 | 30 | 5.40  | ES+ | 2 |
| 71 | PC 18:1e-20:2 | 798.6 | 20 | 508.4 | 30 | 5.40  | ES+ | 1 |
| 72 | PC 18:1e-20:2 | 798.6 | 20 | 530.3 | 30 | 5.40  | ES+ | 2 |
| 73 | PC 18:1e-20:3 | 796.6 | 20 | 508.4 | 30 | 5.40  | ES+ | 1 |
| 74 | PC 18:1e-20:3 | 796.6 | 20 | 528.3 | 30 | 5.40  | ES+ | 2 |
| 75 | PC 18:1e-20:4 | 794.6 | 20 | 508.4 | 30 | 5.40  | ES+ | 1 |
| 76 | PC 18:1e-20:4 | 794.6 | 20 | 526.3 | 30 | 5.40  | ES+ | 2 |
| 77 | PC 18:1e-20:5 | 792.6 | 20 | 508.4 | 30 | 5.40  | ES+ | 1 |
| 78 | PC 18:1e-20:5 | 792.6 | 20 | 524.3 | 30 | 5.40  | ES+ | 2 |
| 79 | PC 18:1e-22:0 | 830.7 | 20 | 508.4 | 30 | 5.40  | ES+ | 1 |
| 80 | PC 18:1e-22:0 | 830.7 | 20 | 562.3 | 30 | 5.40  | ES+ | 2 |
| 81 | PC 18:1e-22:1 | 828.7 | 20 | 508.4 | 30 | 5.40  | ES+ | 1 |
| 82 | PC 18:1e-22:1 | 828.7 | 20 | 560.3 | 30 | 5.40  | ES+ | 2 |
| 83 | PC 18:1e-22:2 | 826.7 | 20 | 508.4 | 30 | 5.40  | ES+ | 1 |
| 84 | PC 18:1e-22:2 | 826.7 | 20 | 558.3 | 30 | 5.40  | ES+ | 2 |
| 85 | PC 18:1e-22:3 | 824.7 | 20 | 508.4 | 30 | 5.40  | ES+ | 1 |
| 86 | PC 18:1e-22:3 | 824.7 | 20 | 556.3 | 30 | 5.40  | ES+ | 2 |
| 87 | PC 18:1e-22:4 | 822.6 | 20 | 508.4 | 30 | 5.40  | ES+ | 1 |
| 88 | PC 18:1e-22:4 | 822.6 | 20 | 554.3 | 30 | 5.40  | ES+ | 2 |
| 89 | PC 18:1e-22:5 | 820.6 | 20 | 508.4 | 30 | 5.40  | ES+ | 1 |
| 90 | PC 18:1e-22:5 | 820.6 | 20 | 552.3 | 30 | 5.40  | ES+ | 2 |
| 91 | PC 18:1e-22:6 | 818.6 | 20 | 508.4 | 30 | 5.40  | ES+ | 1 |
| 92 | PC 18:1e-22:6 | 818.6 | 20 | 550.3 | 30 | 5.40  | ES+ | 2 |
| 93 | PI 16:0-20:0  | 865.6 | 50 | 255.3 | 50 | 12.06 | ES- | 1 |
| 94 | PI 16:0-20:0  | 865.6 | 50 | 311.2 | 50 | 12.06 | ES- | 2 |

|     |              |       |    |       |    |       |     |   |
|-----|--------------|-------|----|-------|----|-------|-----|---|
| 95  | PI 16:0-20:1 | 863.6 | 50 | 255.3 | 50 | 12.06 | ES- | 1 |
| 96  | PI 16:0-20:1 | 863.6 | 50 | 309.2 | 50 | 12.06 | ES- | 2 |
| 97  | PI 16:0-20:2 | 861.5 | 50 | 255.3 | 50 | 12.06 | ES- | 1 |
| 98  | PI 16:0-20:2 | 861.5 | 50 | 307.2 | 50 | 12.06 | ES- | 2 |
| 99  | PI 16:0-20:3 | 859.5 | 50 | 255.3 | 50 | 12.06 | ES- | 1 |
| 100 | PI 16:0-20:3 | 859.5 | 50 | 305.2 | 50 | 12.06 | ES- | 2 |
| 101 | PI 16:0-20:4 | 857.5 | 50 | 255.3 | 50 | 12.06 | ES- | 1 |
| 102 | PI 16:0-20:4 | 857.5 | 50 | 303.2 | 50 | 12.06 | ES- | 2 |
| 103 | PI 16:0-20:5 | 855.5 | 50 | 255.3 | 50 | 12.06 | ES- | 1 |
| 104 | PI 16:0-20:5 | 855.5 | 50 | 301.2 | 50 | 12.06 | ES- | 2 |
| 105 | PI 16:0-22:0 | 893.6 | 50 | 255.3 | 50 | 12.06 | ES- | 1 |
| 106 | PI 16:0-22:0 | 893.6 | 50 | 339.2 | 50 | 12.06 | ES- | 2 |
| 107 | PI 16:0-22:1 | 891.6 | 50 | 255.3 | 50 | 12.06 | ES- | 1 |
| 108 | PI 16:0-22:1 | 891.6 | 50 | 337.2 | 50 | 12.06 | ES- | 2 |
| 109 | PI 16:0-22:2 | 889.6 | 50 | 255.3 | 50 | 12.06 | ES- | 1 |
| 110 | PI 16:0-22:2 | 889.6 | 50 | 335.2 | 50 | 12.06 | ES- | 2 |
| 111 | PI 16:0-22:3 | 887.6 | 50 | 255.3 | 50 | 12.06 | ES- | 1 |
| 112 | PI 16:0-22:3 | 887.6 | 50 | 333.2 | 50 | 12.06 | ES- | 2 |
| 113 | PI 16:0-22:4 | 885.5 | 50 | 255.3 | 50 | 12.06 | ES- | 1 |
| 114 | PI 16:0-22:4 | 885.5 | 50 | 331.2 | 50 | 12.06 | ES- | 2 |
| 115 | PI 16:0-22:5 | 883.5 | 50 | 255.3 | 50 | 12.06 | ES- | 1 |
| 116 | PI 16:0-22:5 | 883.5 | 50 | 329.2 | 50 | 12.06 | ES- | 2 |
| 117 | PI 16:0-22:6 | 881.5 | 50 | 255.3 | 50 | 12.06 | ES- | 1 |
| 118 | PI 16:0-22:6 | 881.5 | 50 | 327.2 | 50 | 12.06 | ES- | 2 |
| 119 | PI 16:1-16:1 | 805.5 | 50 | 253.3 | 50 | 12.06 | ES- | 1 |
| 120 | PI 16:1-18:0 | 835.5 | 50 | 253.3 | 50 | 12.06 | ES- | 1 |
| 121 | PI 16:1-18:0 | 835.5 | 50 | 283.3 | 50 | 12.06 | ES- | 2 |
| 122 | PI 16:1-18:1 | 833.5 | 50 | 253.3 | 50 | 12.06 | ES- | 1 |
| 123 | PI 16:1-18:1 | 833.5 | 50 | 281.3 | 50 | 12.06 | ES- | 2 |
| 124 | PI 16:1-18:2 | 831.5 | 50 | 253.3 | 50 | 12.06 | ES- | 1 |
| 125 | PI 16:1-18:2 | 831.5 | 50 | 279.3 | 50 | 12.06 | ES- | 2 |
| 126 | PI 16:1-18:3 | 829.5 | 50 | 253.3 | 50 | 12.06 | ES- | 1 |
| 127 | PI 16:1-18:3 | 829.5 | 50 | 277.3 | 50 | 12.06 | ES- | 2 |
| 128 | PI 16:1-18:4 | 827.5 | 50 | 253.3 | 50 | 12.06 | ES- | 1 |
| 129 | PI 16:1-18:4 | 827.5 | 50 | 275.3 | 50 | 12.06 | ES- | 2 |

|     |              |       |    |       |    |       |     |   |
|-----|--------------|-------|----|-------|----|-------|-----|---|
| 130 | PI 16:1-20:0 | 863.6 | 50 | 253.3 | 50 | 12.06 | ES- | 1 |
| 131 | PI 16:1-20:0 | 863.6 | 50 | 311.2 | 50 | 12.06 | ES- | 2 |
| 132 | PI 16:1-20:1 | 861.5 | 50 | 253.3 | 50 | 12.06 | ES- | 1 |
| 133 | PI 16:1-20:1 | 861.5 | 50 | 309.2 | 50 | 12.06 | ES- | 2 |
| 134 | PI 16:1-20:2 | 859.5 | 50 | 253.3 | 50 | 12.06 | ES- | 1 |
| 135 | PI 16:1-20:2 | 859.5 | 50 | 307.2 | 50 | 12.06 | ES- | 2 |
| 136 | PI 16:1-20:3 | 857.5 | 50 | 253.3 | 50 | 12.06 | ES- | 1 |
| 137 | PI 16:1-20:3 | 857.5 | 50 | 305.2 | 50 | 12.06 | ES- | 2 |
| 138 | PI 16:1-20:4 | 855.5 | 50 | 253.3 | 50 | 12.06 | ES- | 1 |
| 139 | PI 16:1-20:4 | 855.5 | 50 | 303.2 | 50 | 12.06 | ES- | 2 |
| 140 | PI 16:1-20:5 | 853.5 | 50 | 253.3 | 50 | 12.06 | ES- | 1 |
| 141 | PI 16:1-20:5 | 853.5 | 50 | 301.2 | 50 | 12.06 | ES- | 2 |
| 142 | PI 16:1-22:0 | 891.6 | 50 | 253.3 | 50 | 12.06 | ES- | 1 |
| 143 | PI 16:1-22:0 | 891.6 | 50 | 339.2 | 50 | 12.06 | ES- | 2 |
| 144 | PI 16:1-22:1 | 889.6 | 50 | 253.3 | 50 | 12.06 | ES- | 1 |
| 145 | PI 16:1-22:1 | 889.6 | 50 | 337.2 | 50 | 12.06 | ES- | 2 |
| 146 | PI 16:1-22:2 | 887.6 | 50 | 253.3 | 50 | 12.06 | ES- | 1 |
| 147 | PI 16:1-22:2 | 887.6 | 50 | 335.2 | 50 | 12.06 | ES- | 2 |
| 148 | PI 16:1-22:3 | 885.5 | 50 | 253.3 | 50 | 12.06 | ES- | 1 |
| 149 | PI 16:1-22:3 | 885.5 | 50 | 333.2 | 50 | 12.06 | ES- | 2 |
| 150 | PI 16:1-22:4 | 883.5 | 50 | 253.3 | 50 | 12.06 | ES- | 1 |
| 151 | PI 16:1-22:4 | 883.5 | 50 | 331.2 | 50 | 12.06 | ES- | 2 |
| 152 | PI 16:1-22:5 | 881.5 | 50 | 253.3 | 50 | 12.06 | ES- | 1 |
| 153 | PI 16:1-22:5 | 881.5 | 50 | 329.2 | 50 | 12.06 | ES- | 2 |
| 154 | PI 16:1-22:6 | 879.5 | 50 | 253.3 | 50 | 12.06 | ES- | 1 |
| 155 | PI 16:1-22:6 | 879.5 | 50 | 327.2 | 50 | 12.06 | ES- | 2 |
| 156 | PI 17:0-14:1 | 793.5 | 50 | 225.3 | 50 | 12.06 | ES- | 1 |
| 157 | PI 17:0-14:1 | 793.5 | 50 | 269.3 | 50 | 12.06 | ES- | 2 |
| 158 | PI 18:0-18:0 | 865.6 | 50 | 283.3 | 50 | 12.06 | ES- | 1 |
| 159 | PI 18:0-18:1 | 863.6 | 50 | 281.3 | 50 | 12.06 | ES- | 1 |
| 160 | PI 18:0-18:1 | 863.6 | 50 | 283.3 | 50 | 12.06 | ES- | 2 |
| 161 | PI 18:0-18:2 | 861.5 | 50 | 279.3 | 50 | 12.06 | ES- | 1 |
| 162 | PI 18:0-18:2 | 861.5 | 50 | 283.3 | 50 | 12.06 | ES- | 2 |
| 163 | PI 18:0-18:3 | 859.5 | 50 | 277.3 | 50 | 12.06 | ES- | 1 |
| 164 | PI 18:0-18:3 | 859.5 | 50 | 283.3 | 50 | 12.06 | ES- | 2 |

|     |              |       |    |       |    |       |     |   |
|-----|--------------|-------|----|-------|----|-------|-----|---|
| 165 | PI 18:0-18:4 | 857.5 | 50 | 275.3 | 50 | 12.06 | ES- | 1 |
| 166 | PI 18:0-18:4 | 857.5 | 50 | 283.3 | 50 | 12.06 | ES- | 2 |
| 167 | PI 18:0-20:0 | 893.6 | 50 | 283.3 | 50 | 12.06 | ES- | 1 |
| 168 | PI 18:0-20:0 | 893.6 | 50 | 311.2 | 50 | 12.06 | ES- | 2 |
| 169 | PI 18:0-20:1 | 891.6 | 50 | 283.3 | 50 | 12.06 | ES- | 1 |
| 170 | PI 18:0-20:1 | 891.6 | 50 | 309.2 | 50 | 12.06 | ES- | 2 |
| 171 | PI 18:0-20:2 | 889.6 | 50 | 283.3 | 50 | 12.06 | ES- | 1 |
| 172 | PI 18:0-20:2 | 889.6 | 50 | 307.2 | 50 | 12.06 | ES- | 2 |
| 173 | PI 18:0-20:3 | 887.6 | 50 | 283.3 | 50 | 12.06 | ES- | 1 |
| 174 | PI 18:0-20:3 | 887.6 | 50 | 305.2 | 50 | 12.06 | ES- | 2 |
| 175 | PI 18:0-20:4 | 885.5 | 50 | 283.3 | 50 | 12.06 | ES- | 1 |
| 176 | PI 18:0-20:4 | 885.5 | 50 | 303.2 | 50 | 12.06 | ES- | 2 |
| 177 | PI 18:0-20:5 | 883.5 | 50 | 283.3 | 50 | 12.06 | ES- | 1 |
| 178 | PI 18:0-20:5 | 883.5 | 50 | 301.2 | 50 | 12.06 | ES- | 2 |
| 179 | PI 18:0-22:0 | 921.6 | 50 | 283.3 | 50 | 12.06 | ES- | 1 |
| 180 | PI 18:0-22:0 | 921.6 | 50 | 339.2 | 50 | 12.06 | ES- | 2 |
| 181 | PI 18:0-22:1 | 919.6 | 50 | 283.3 | 50 | 12.06 | ES- | 1 |
| 182 | PI 18:0-22:1 | 919.6 | 50 | 337.2 | 50 | 12.06 | ES- | 2 |
| 183 | PI 18:0-22:2 | 917.6 | 50 | 283.3 | 50 | 12.06 | ES- | 1 |
| 184 | PI 18:0-22:2 | 917.6 | 50 | 335.2 | 50 | 12.06 | ES- | 2 |
| 185 | PI 18:0-22:3 | 915.6 | 50 | 283.3 | 50 | 12.06 | ES- | 1 |
| 186 | PI 18:0-22:3 | 915.6 | 50 | 333.2 | 50 | 12.06 | ES- | 2 |
| 187 | PI 18:0-22:4 | 913.6 | 50 | 283.3 | 50 | 12.06 | ES- | 1 |
| 188 | PI 18:0-22:4 | 913.6 | 50 | 331.2 | 50 | 12.06 | ES- | 2 |
| 189 | PI 18:0-22:5 | 911.6 | 50 | 283.3 | 50 | 12.06 | ES- | 1 |
| 190 | PI 18:0-22:5 | 911.6 | 50 | 329.2 | 50 | 12.06 | ES- | 2 |
| 191 | PI 18:0-22:6 | 909.5 | 50 | 283.3 | 50 | 12.06 | ES- | 1 |
| 192 | PI 18:0-22:6 | 909.5 | 50 | 327.2 | 50 | 12.06 | ES- | 2 |
| 193 | PI 18:1-18:1 | 861.5 | 50 | 281.3 | 50 | 12.06 | ES- | 1 |
| 194 | PI 18:1-18:2 | 859.5 | 50 | 279.3 | 50 | 12.06 | ES- | 1 |
| 195 | PI 18:1-18:2 | 859.5 | 50 | 281.3 | 50 | 12.06 | ES- | 2 |
| 196 | PI 18:1-18:3 | 857.5 | 50 | 277.3 | 50 | 12.06 | ES- | 1 |
| 197 | PI 18:1-18:3 | 857.5 | 50 | 281.3 | 50 | 12.06 | ES- | 2 |
| 198 | PI 18:1-18:4 | 855.5 | 50 | 275.3 | 50 | 12.06 | ES- | 1 |
| 199 | PI 18:1-18:4 | 855.5 | 50 | 281.3 | 50 | 12.06 | ES- | 2 |

|     |              |       |    |       |    |       |     |   |
|-----|--------------|-------|----|-------|----|-------|-----|---|
| 200 | PI 18:1-20:0 | 891.6 | 50 | 281.3 | 50 | 12.06 | ES- | 1 |
| 201 | PI 18:1-20:0 | 891.6 | 50 | 311.2 | 50 | 12.06 | ES- | 2 |
| 202 | PI 18:1-20:1 | 889.6 | 50 | 281.3 | 50 | 12.06 | ES- | 1 |
| 203 | PI 18:1-20:1 | 889.6 | 50 | 309.2 | 50 | 12.06 | ES- | 2 |
| 204 | PI 18:1-20:2 | 887.6 | 50 | 281.3 | 50 | 12.06 | ES- | 1 |
| 205 | PI 18:1-20:2 | 887.6 | 50 | 307.2 | 50 | 12.06 | ES- | 2 |
| 206 | PI 18:1-20:3 | 885.5 | 50 | 281.3 | 50 | 12.06 | ES- | 1 |
| 207 | PI 18:1-20:3 | 885.5 | 50 | 305.2 | 50 | 12.06 | ES- | 2 |
| 208 | PI 18:1-20:4 | 883.5 | 50 | 281.3 | 50 | 12.06 | ES- | 1 |
| 209 | PI 18:1-20:4 | 883.5 | 50 | 303.2 | 50 | 12.06 | ES- | 2 |
| 210 | PI 18:1-20:5 | 881.5 | 50 | 281.3 | 50 | 12.06 | ES- | 1 |
| 211 | PI 18:1-20:5 | 881.5 | 50 | 301.2 | 50 | 12.06 | ES- | 2 |
| 212 | PI 18:1-22:0 | 919.6 | 50 | 281.3 | 50 | 12.06 | ES- | 1 |
| 213 | PI 18:1-22:0 | 919.6 | 50 | 339.2 | 50 | 12.06 | ES- | 2 |
| 214 | PI 18:1-22:1 | 917.6 | 50 | 281.3 | 50 | 12.06 | ES- | 1 |
| 215 | PI 18:1-22:1 | 917.6 | 50 | 337.2 | 50 | 12.06 | ES- | 2 |
| 216 | PI 18:1-22:2 | 915.6 | 50 | 281.3 | 50 | 12.06 | ES- | 1 |
| 217 | PI 18:1-22:2 | 915.6 | 50 | 335.2 | 50 | 12.06 | ES- | 2 |
| 218 | PI 18:1-22:3 | 913.6 | 50 | 281.3 | 50 | 12.06 | ES- | 1 |
| 219 | PI 18:1-22:3 | 913.6 | 50 | 333.2 | 50 | 12.06 | ES- | 2 |
| 220 | PI 18:1-22:4 | 911.6 | 50 | 281.3 | 50 | 12.06 | ES- | 1 |
| 221 | PI 18:1-22:4 | 911.6 | 50 | 331.2 | 50 | 12.06 | ES- | 2 |
| 222 | PI 18:1-22:5 | 909.5 | 50 | 281.3 | 50 | 12.06 | ES- | 1 |
| 223 | PI 18:1-22:5 | 909.5 | 50 | 329.2 | 50 | 12.06 | ES- | 2 |
| 224 | PI 18:1-22:6 | 907.5 | 50 | 281.3 | 50 | 12.06 | ES- | 1 |
| 225 | PI 18:1-22:6 | 907.5 | 50 | 327.2 | 50 | 12.06 | ES- | 2 |
| 226 | PI 18:2-18:2 | 857.5 | 50 | 279.3 | 50 | 12.06 | ES- | 1 |
| 227 | PI 18:2-18:3 | 855.5 | 50 | 277.3 | 50 | 12.06 | ES- | 1 |
| 228 | PI 18:2-18:3 | 855.5 | 50 | 279.3 | 50 | 12.06 | ES- | 2 |
| 229 | PI 18:2-18:4 | 853.5 | 50 | 275.3 | 50 | 12.06 | ES- | 1 |
| 230 | PI 18:2-18:4 | 853.5 | 50 | 279.3 | 50 | 12.06 | ES- | 2 |
| 231 | PI 18:2-20:0 | 889.6 | 50 | 279.3 | 50 | 12.06 | ES- | 1 |
| 232 | PI 18:2-20:0 | 889.6 | 50 | 311.2 | 50 | 12.06 | ES- | 2 |
| 233 | PI 18:2-20:1 | 887.6 | 50 | 279.3 | 50 | 12.06 | ES- | 1 |
| 234 | PI 18:2-20:1 | 887.6 | 50 | 309.2 | 50 | 12.06 | ES- | 2 |



|     |              |       |    |       |    |       |     |   |
|-----|--------------|-------|----|-------|----|-------|-----|---|
| 235 | PI 18:2-20:2 | 885.5 | 50 | 279.3 | 50 | 12.06 | ES- | 1 |
| 236 | PI 18:2-20:2 | 885.5 | 50 | 307.2 | 50 | 12.06 | ES- | 2 |
| 237 | PI 18:2-20:3 | 883.5 | 50 | 279.3 | 50 | 12.06 | ES- | 1 |
| 238 | PI 18:2-20:3 | 883.5 | 50 | 305.2 | 50 | 12.06 | ES- | 2 |
| 239 | PI 18:2-20:4 | 881.5 | 50 | 279.3 | 50 | 12.06 | ES- | 1 |
| 240 | PI 18:2-20:4 | 881.5 | 50 | 303.2 | 50 | 12.06 | ES- | 2 |
| 241 | PI 18:2-20:5 | 879.5 | 50 | 279.3 | 50 | 12.06 | ES- | 1 |
| 242 | PI 18:2-20:5 | 879.5 | 50 | 301.2 | 50 | 12.06 | ES- | 2 |

Method 7: PCe and PI (3)

| No | Name          | Precursor | CV (V) | Product | CE (V) | RT setting (min) | IonMode | Ion |
|----|---------------|-----------|--------|---------|--------|------------------|---------|-----|
| 1  | PC 18:2e-12:0 | 688.5     | 20     | 422.3   | 30     | 5.40             | ES+     | 1   |
| 2  | PC 18:2e-12:0 | 688.5     | 20     | 506.4   | 30     | 5.40             | ES+     | 2   |
| 3  | PC 18:2e-14:0 | 716.6     | 20     | 450.3   | 30     | 5.40             | ES+     | 1   |
| 4  | PC 18:2e-14:0 | 716.6     | 20     | 506.4   | 30     | 5.40             | ES+     | 2   |
| 5  | PC 18:2e-14:1 | 714.5     | 20     | 448.3   | 30     | 5.40             | ES+     | 1   |
| 6  | PC 18:2e-14:1 | 714.5     | 20     | 506.4   | 30     | 5.40             | ES+     | 2   |
| 7  | PC 18:2e-16:0 | 744.6     | 20     | 478.3   | 30     | 5.40             | ES+     | 1   |
| 8  | PC 18:2e-16:0 | 744.6     | 20     | 506.4   | 30     | 5.40             | ES+     | 2   |
| 9  | PC 18:2e-16:1 | 742.6     | 20     | 476.3   | 30     | 5.40             | ES+     | 1   |
| 10 | PC 18:2e-16:1 | 742.6     | 20     | 506.4   | 30     | 5.40             | ES+     | 2   |
| 11 | PC 18:2e-18:0 | 772.6     | 20     | 506.3   | 30     | 5.40             | ES+     | 1   |
| 12 | PC 18:2e-18:1 | 770.6     | 20     | 504.3   | 30     | 5.40             | ES+     | 1   |
| 13 | PC 18:2e-18:1 | 770.6     | 20     | 506.4   | 30     | 5.40             | ES+     | 2   |
| 14 | PC 18:2e-18:2 | 768.6     | 20     | 502.3   | 30     | 5.40             | ES+     | 1   |
| 15 | PC 18:2e-18:2 | 768.6     | 20     | 506.4   | 30     | 5.40             | ES+     | 2   |
| 16 | PC 18:2e-18:3 | 766.6     | 20     | 500.3   | 30     | 5.40             | ES+     | 1   |
| 17 | PC 18:2e-18:3 | 766.6     | 20     | 506.4   | 30     | 5.40             | ES+     | 2   |
| 18 | PC 18:2e-18:4 | 764.6     | 20     | 498.3   | 30     | 5.40             | ES+     | 1   |
| 19 | PC 18:2e-18:4 | 764.6     | 20     | 506.4   | 30     | 5.40             | ES+     | 2   |
| 20 | PC 18:2e-20:0 | 800.7     | 20     | 506.4   | 30     | 5.40             | ES+     | 1   |
| 21 | PC 18:2e-20:0 | 800.7     | 20     | 534.3   | 30     | 5.40             | ES+     | 2   |
| 22 | PC 18:2e-20:1 | 798.6     | 20     | 506.4   | 30     | 5.40             | ES+     | 1   |
| 23 | PC 18:2e-20:1 | 798.6     | 20     | 532.3   | 30     | 5.40             | ES+     | 2   |
| 24 | PC 18:2e-20:2 | 796.6     | 20     | 506.4   | 30     | 5.40             | ES+     | 1   |
| 25 | PC 18:2e-20:2 | 796.6     | 20     | 530.3   | 30     | 5.40             | ES+     | 2   |

|    |               |       |    |       |    |       |     |   |
|----|---------------|-------|----|-------|----|-------|-----|---|
| 26 | PC 18:2e-20:3 | 794.6 | 20 | 506.4 | 30 | 5.40  | ES+ | 1 |
| 27 | PC 18:2e-20:3 | 794.6 | 20 | 528.3 | 30 | 5.40  | ES+ | 2 |
| 28 | PC 18:2e-20:4 | 792.6 | 20 | 506.4 | 30 | 5.40  | ES+ | 1 |
| 29 | PC 18:2e-20:4 | 792.6 | 20 | 526.3 | 30 | 5.40  | ES+ | 2 |
| 30 | PC 18:2e-20:5 | 790.6 | 20 | 506.4 | 30 | 5.40  | ES+ | 1 |
| 31 | PC 18:2e-20:5 | 790.6 | 20 | 524.3 | 30 | 5.40  | ES+ | 2 |
| 32 | PC 18:2e-22:0 | 828.7 | 20 | 506.4 | 30 | 5.40  | ES+ | 1 |
| 33 | PC 18:2e-22:0 | 828.7 | 20 | 562.3 | 30 | 5.40  | ES+ | 2 |
| 34 | PC 18:2e-22:1 | 826.7 | 20 | 506.4 | 30 | 5.40  | ES+ | 1 |
| 35 | PC 18:2e-22:1 | 826.7 | 20 | 560.3 | 30 | 5.40  | ES+ | 2 |
| 36 | PC 18:2e-22:2 | 824.7 | 20 | 506.4 | 30 | 5.40  | ES+ | 1 |
| 37 | PC 18:2e-22:2 | 824.7 | 20 | 558.3 | 30 | 5.40  | ES+ | 2 |
| 38 | PC 18:2e-22:3 | 822.6 | 20 | 506.4 | 30 | 5.40  | ES+ | 1 |
| 39 | PC 18:2e-22:3 | 822.6 | 20 | 556.3 | 30 | 5.40  | ES+ | 2 |
| 40 | PC 18:2e-22:4 | 820.6 | 20 | 506.4 | 30 | 5.40  | ES+ | 1 |
| 41 | PC 18:2e-22:4 | 820.6 | 20 | 554.3 | 30 | 5.40  | ES+ | 2 |
| 42 | PC 18:2e-22:5 | 818.6 | 20 | 506.4 | 30 | 5.40  | ES+ | 1 |
| 43 | PC 18:2e-22:5 | 818.6 | 20 | 552.3 | 30 | 5.40  | ES+ | 2 |
| 44 | PC 18:2e-22:6 | 816.6 | 20 | 506.4 | 30 | 5.40  | ES+ | 1 |
| 45 | PC 18:2e-22:6 | 816.6 | 20 | 550.3 | 30 | 5.40  | ES+ | 2 |
| 46 | PI 18:2-22:0  | 917.6 | 50 | 279.3 | 50 | 12.06 | ES- | 1 |
| 47 | PI 18:2-22:0  | 917.6 | 50 | 339.2 | 50 | 12.06 | ES- | 2 |
| 48 | PI 18:2-22:1  | 915.6 | 50 | 279.3 | 50 | 12.06 | ES- | 1 |
| 49 | PI 18:2-22:1  | 915.6 | 50 | 337.2 | 50 | 12.06 | ES- | 2 |
| 50 | PI 18:2-22:2  | 913.6 | 50 | 279.3 | 50 | 12.06 | ES- | 1 |
| 51 | PI 18:2-22:2  | 913.6 | 50 | 335.2 | 50 | 12.06 | ES- | 2 |
| 52 | PI 18:2-22:3  | 911.6 | 50 | 279.3 | 50 | 12.06 | ES- | 1 |
| 53 | PI 18:2-22:3  | 911.6 | 50 | 333.2 | 50 | 12.06 | ES- | 2 |
| 54 | PI 18:2-22:4  | 909.5 | 50 | 279.3 | 50 | 12.06 | ES- | 1 |
| 55 | PI 18:2-22:4  | 909.5 | 50 | 331.2 | 50 | 12.06 | ES- | 2 |
| 56 | PI 18:2-22:5  | 907.5 | 50 | 279.3 | 50 | 12.06 | ES- | 1 |
| 57 | PI 18:2-22:5  | 907.5 | 50 | 329.2 | 50 | 12.06 | ES- | 2 |
| 58 | PI 18:2-22:6  | 905.5 | 50 | 279.3 | 50 | 12.06 | ES- | 1 |
| 59 | PI 18:2-22:6  | 905.5 | 50 | 327.2 | 50 | 12.06 | ES- | 2 |
| 60 | PI 18:3-18:3  | 853.5 | 50 | 277.3 | 50 | 12.06 | ES- | 1 |

|    |              |       |    |       |    |       |     |   |
|----|--------------|-------|----|-------|----|-------|-----|---|
| 61 | PI 18:3-18:4 | 851.5 | 50 | 275.3 | 50 | 12.06 | ES- | 1 |
| 62 | PI 18:3-18:4 | 851.5 | 50 | 277.3 | 50 | 12.06 | ES- | 2 |
| 63 | PI 18:3-20:0 | 887.6 | 50 | 277.3 | 50 | 12.06 | ES- | 1 |
| 64 | PI 18:3-20:0 | 887.6 | 50 | 311.2 | 50 | 12.06 | ES- | 2 |
| 65 | PI 18:3-20:1 | 885.5 | 50 | 277.3 | 50 | 12.06 | ES- | 1 |
| 66 | PI 18:3-20:1 | 885.5 | 50 | 309.2 | 50 | 12.06 | ES- | 2 |
| 67 | PI 18:3-20:2 | 883.5 | 50 | 277.3 | 50 | 12.06 | ES- | 1 |
| 68 | PI 18:3-20:2 | 883.5 | 50 | 307.2 | 50 | 12.06 | ES- | 2 |
| 69 | PI 18:3-20:3 | 881.5 | 50 | 277.3 | 50 | 12.06 | ES- | 1 |
| 70 | PI 18:3-20:3 | 881.5 | 50 | 305.2 | 50 | 12.06 | ES- | 2 |
| 71 | PI 18:3-20:4 | 879.5 | 50 | 277.3 | 50 | 12.06 | ES- | 1 |
| 72 | PI 18:3-20:4 | 879.5 | 50 | 303.2 | 50 | 12.06 | ES- | 2 |
| 73 | PI 18:3-20:5 | 877.5 | 50 | 277.3 | 50 | 12.06 | ES- | 1 |
| 74 | PI 18:3-20:5 | 877.5 | 50 | 301.2 | 50 | 12.06 | ES- | 2 |
| 75 | PI 18:3-22:0 | 915.6 | 50 | 277.3 | 50 | 12.06 | ES- | 1 |
| 76 | PI 18:3-22:0 | 915.6 | 50 | 339.2 | 50 | 12.06 | ES- | 2 |
| 77 | PI 18:3-22:1 | 913.6 | 50 | 277.3 | 50 | 12.06 | ES- | 1 |
| 78 | PI 18:3-22:1 | 913.6 | 50 | 337.2 | 50 | 12.06 | ES- | 2 |
| 79 | PI 18:3-22:2 | 911.6 | 50 | 277.3 | 50 | 12.06 | ES- | 1 |
| 80 | PI 18:3-22:2 | 911.6 | 50 | 335.2 | 50 | 12.06 | ES- | 2 |
| 81 | PI 18:3-22:3 | 909.5 | 50 | 277.3 | 50 | 12.06 | ES- | 1 |
| 82 | PI 18:3-22:3 | 909.5 | 50 | 333.2 | 50 | 12.06 | ES- | 2 |
| 83 | PI 18:3-22:4 | 907.5 | 50 | 277.3 | 50 | 12.06 | ES- | 1 |
| 84 | PI 18:3-22:4 | 907.5 | 50 | 331.2 | 50 | 12.06 | ES- | 2 |
| 85 | PI 18:3-22:5 | 905.5 | 50 | 277.3 | 50 | 12.06 | ES- | 1 |
| 86 | PI 18:3-22:5 | 905.5 | 50 | 329.2 | 50 | 12.06 | ES- | 2 |
| 87 | PI 18:3-22:6 | 903.5 | 50 | 277.3 | 50 | 12.06 | ES- | 1 |
| 88 | PI 18:3-22:6 | 903.5 | 50 | 327.2 | 50 | 12.06 | ES- | 2 |
| 89 | PI 18:4-18:4 | 849.5 | 50 | 275.3 | 50 | 12.06 | ES- | 1 |
| 90 | PI 18:4-20:0 | 885.5 | 50 | 275.3 | 50 | 12.06 | ES- | 1 |
| 91 | PI 18:4-20:0 | 885.5 | 50 | 311.2 | 50 | 12.06 | ES- | 2 |
| 92 | PI 18:4-20:1 | 883.5 | 50 | 275.3 | 50 | 12.06 | ES- | 1 |
| 93 | PI 18:4-20:1 | 883.5 | 50 | 309.2 | 50 | 12.06 | ES- | 2 |
| 94 | PI 18:4-20:2 | 881.5 | 50 | 275.3 | 50 | 12.06 | ES- | 1 |
| 95 | PI 18:4-20:2 | 881.5 | 50 | 307.2 | 50 | 12.06 | ES- | 2 |

|     |              |       |    |       |    |       |     |   |
|-----|--------------|-------|----|-------|----|-------|-----|---|
| 96  | PI 18:4-20:3 | 879.5 | 50 | 275.3 | 50 | 12.06 | ES- | 1 |
| 97  | PI 18:4-20:3 | 879.5 | 50 | 305.2 | 50 | 12.06 | ES- | 2 |
| 98  | PI 18:4-20:4 | 877.5 | 50 | 275.3 | 50 | 12.06 | ES- | 1 |
| 99  | PI 18:4-20:4 | 877.5 | 50 | 303.2 | 50 | 12.06 | ES- | 2 |
| 100 | PI 18:4-20:5 | 875.5 | 50 | 275.3 | 50 | 12.06 | ES- | 1 |
| 101 | PI 18:4-20:5 | 875.5 | 50 | 301.2 | 50 | 12.06 | ES- | 2 |
| 102 | PI 18:4-22:0 | 913.6 | 50 | 275.3 | 50 | 12.06 | ES- | 1 |
| 103 | PI 18:4-22:0 | 913.6 | 50 | 339.2 | 50 | 12.06 | ES- | 2 |
| 104 | PI 18:4-22:1 | 911.6 | 50 | 275.3 | 50 | 12.06 | ES- | 1 |
| 105 | PI 18:4-22:1 | 911.6 | 50 | 337.2 | 50 | 12.06 | ES- | 2 |
| 106 | PI 18:4-22:2 | 909.5 | 50 | 275.3 | 50 | 12.06 | ES- | 1 |
| 107 | PI 18:4-22:2 | 909.5 | 50 | 335.2 | 50 | 12.06 | ES- | 2 |
| 108 | PI 18:4-22:3 | 907.5 | 50 | 275.3 | 50 | 12.06 | ES- | 1 |
| 109 | PI 18:4-22:3 | 907.5 | 50 | 333.2 | 50 | 12.06 | ES- | 2 |
| 110 | PI 18:4-22:4 | 905.5 | 50 | 275.3 | 50 | 12.06 | ES- | 1 |
| 111 | PI 18:4-22:4 | 905.5 | 50 | 331.2 | 50 | 12.06 | ES- | 2 |
| 112 | PI 18:4-22:5 | 903.5 | 50 | 275.3 | 50 | 12.06 | ES- | 1 |
| 113 | PI 18:4-22:5 | 903.5 | 50 | 329.2 | 50 | 12.06 | ES- | 2 |
| 114 | PI 18:4-22:6 | 901.5 | 50 | 275.3 | 50 | 12.06 | ES- | 1 |
| 115 | PI 18:4-22:6 | 901.5 | 50 | 327.2 | 50 | 12.06 | ES- | 2 |
| 116 | PI 20:0-20:0 | 921.6 | 50 | 311.2 | 50 | 12.06 | ES- | 1 |
| 117 | PI 20:0-20:1 | 919.6 | 50 | 309.2 | 50 | 12.06 | ES- | 1 |
| 118 | PI 20:0-20:1 | 919.6 | 50 | 311.2 | 50 | 12.06 | ES- | 2 |
| 119 | PI 20:0-20:2 | 917.6 | 50 | 307.2 | 50 | 12.06 | ES- | 1 |
| 120 | PI 20:0-20:2 | 917.6 | 50 | 311.2 | 50 | 12.06 | ES- | 2 |
| 121 | PI 20:0-20:3 | 915.6 | 50 | 305.2 | 50 | 12.06 | ES- | 1 |
| 122 | PI 20:0-20:3 | 915.6 | 50 | 311.2 | 50 | 12.06 | ES- | 2 |
| 123 | PI 20:0-20:4 | 913.6 | 50 | 303.2 | 50 | 12.06 | ES- | 1 |
| 124 | PI 20:0-20:4 | 913.6 | 50 | 311.2 | 50 | 12.06 | ES- | 2 |
| 125 | PI 20:0-20:5 | 911.6 | 50 | 301.2 | 50 | 12.06 | ES- | 1 |
| 126 | PI 20:0-20:5 | 911.6 | 50 | 311.2 | 50 | 12.06 | ES- | 2 |
| 127 | PI 20:0-22:0 | 949.7 | 50 | 311.2 | 50 | 12.06 | ES- | 1 |
| 128 | PI 20:0-22:0 | 949.7 | 50 | 339.2 | 50 | 12.06 | ES- | 2 |
| 129 | PI 20:0-22:1 | 947.7 | 50 | 311.2 | 50 | 12.06 | ES- | 1 |
| 130 | PI 20:0-22:1 | 947.7 | 50 | 337.2 | 50 | 12.06 | ES- | 2 |

|     |              |       |    |       |    |       |     |   |
|-----|--------------|-------|----|-------|----|-------|-----|---|
| 131 | PI 20:0-22:2 | 945.6 | 50 | 311.2 | 50 | 12.06 | ES- | 1 |
| 132 | PI 20:0-22:2 | 945.6 | 50 | 335.2 | 50 | 12.06 | ES- | 2 |
| 133 | PI 20:0-22:3 | 943.6 | 50 | 311.2 | 50 | 12.06 | ES- | 1 |
| 134 | PI 20:0-22:3 | 943.6 | 50 | 333.2 | 50 | 12.06 | ES- | 2 |
| 135 | PI 20:0-22:4 | 941.6 | 50 | 311.2 | 50 | 12.06 | ES- | 1 |
| 136 | PI 20:0-22:4 | 941.6 | 50 | 331.2 | 50 | 12.06 | ES- | 2 |
| 137 | PI 20:0-22:5 | 939.6 | 50 | 311.2 | 50 | 12.06 | ES- | 1 |
| 138 | PI 20:0-22:5 | 939.6 | 50 | 329.2 | 50 | 12.06 | ES- | 2 |
| 139 | PI 20:0-22:6 | 937.6 | 50 | 311.2 | 50 | 12.06 | ES- | 1 |
| 140 | PI 20:0-22:6 | 937.6 | 50 | 327.2 | 50 | 12.06 | ES- | 2 |
| 141 | PI 20:1-20:1 | 917.6 | 50 | 309.2 | 50 | 12.06 | ES- | 1 |
| 142 | PI 20:1-20:2 | 915.6 | 50 | 307.2 | 50 | 12.06 | ES- | 1 |
| 143 | PI 20:1-20:2 | 915.6 | 50 | 309.2 | 50 | 12.06 | ES- | 2 |
| 144 | PI 20:1-20:3 | 913.6 | 50 | 305.2 | 50 | 12.06 | ES- | 1 |
| 145 | PI 20:1-20:3 | 913.6 | 50 | 309.2 | 50 | 12.06 | ES- | 2 |
| 146 | PI 20:1-20:4 | 911.6 | 50 | 303.2 | 50 | 12.06 | ES- | 1 |
| 147 | PI 20:1-20:4 | 911.6 | 50 | 309.2 | 50 | 12.06 | ES- | 2 |
| 148 | PI 20:1-20:5 | 909.5 | 50 | 301.2 | 50 | 12.06 | ES- | 1 |
| 149 | PI 20:1-20:5 | 909.5 | 50 | 309.2 | 50 | 12.06 | ES- | 2 |
| 150 | PI 20:1-22:0 | 947.7 | 50 | 309.2 | 50 | 12.06 | ES- | 1 |
| 151 | PI 20:1-22:0 | 947.7 | 50 | 339.2 | 50 | 12.06 | ES- | 2 |
| 152 | PI 20:1-22:1 | 945.6 | 50 | 309.2 | 50 | 12.06 | ES- | 1 |
| 153 | PI 20:1-22:1 | 945.6 | 50 | 337.2 | 50 | 12.06 | ES- | 2 |
| 154 | PI 20:1-22:2 | 943.6 | 50 | 309.2 | 50 | 12.06 | ES- | 1 |
| 155 | PI 20:1-22:2 | 943.6 | 50 | 335.2 | 50 | 12.06 | ES- | 2 |
| 156 | PI 20:1-22:3 | 941.6 | 50 | 309.2 | 50 | 12.06 | ES- | 1 |
| 157 | PI 20:1-22:3 | 941.6 | 50 | 333.2 | 50 | 12.06 | ES- | 2 |
| 158 | PI 20:1-22:4 | 939.6 | 50 | 309.2 | 50 | 12.06 | ES- | 1 |
| 159 | PI 20:1-22:4 | 939.6 | 50 | 331.2 | 50 | 12.06 | ES- | 2 |
| 160 | PI 20:1-22:5 | 937.6 | 50 | 309.2 | 50 | 12.06 | ES- | 1 |
| 161 | PI 20:1-22:5 | 937.6 | 50 | 329.2 | 50 | 12.06 | ES- | 2 |
| 162 | PI 20:1-22:6 | 935.6 | 50 | 309.2 | 50 | 12.06 | ES- | 1 |
| 163 | PI 20:1-22:6 | 935.6 | 50 | 327.2 | 50 | 12.06 | ES- | 2 |
| 164 | PI 20:2-20:2 | 913.6 | 50 | 307.2 | 50 | 12.06 | ES- | 1 |
| 165 | PI 20:2-20:3 | 911.6 | 50 | 305.2 | 50 | 12.06 | ES- | 1 |

|     |              |       |    |       |    |       |     |   |
|-----|--------------|-------|----|-------|----|-------|-----|---|
| 166 | PI 20:2-20:3 | 911.6 | 50 | 307.2 | 50 | 12.06 | ES- | 2 |
| 167 | PI 20:2-20:4 | 909.5 | 50 | 303.2 | 50 | 12.06 | ES- | 1 |
| 168 | PI 20:2-20:4 | 909.5 | 50 | 307.2 | 50 | 12.06 | ES- | 2 |
| 169 | PI 20:2-20:5 | 907.5 | 50 | 301.2 | 50 | 12.06 | ES- | 1 |
| 170 | PI 20:2-20:5 | 907.5 | 50 | 307.2 | 50 | 12.06 | ES- | 2 |
| 171 | PI 20:2-22:0 | 945.6 | 50 | 307.2 | 50 | 12.06 | ES- | 1 |
| 172 | PI 20:2-22:0 | 945.6 | 50 | 339.2 | 50 | 12.06 | ES- | 2 |
| 173 | PI 20:2-22:1 | 943.6 | 50 | 307.2 | 50 | 12.06 | ES- | 1 |
| 174 | PI 20:2-22:1 | 943.6 | 50 | 337.2 | 50 | 12.06 | ES- | 2 |
| 175 | PI 20:2-22:2 | 941.6 | 50 | 307.2 | 50 | 12.06 | ES- | 1 |
| 176 | PI 20:2-22:2 | 941.6 | 50 | 335.2 | 50 | 12.06 | ES- | 2 |
| 177 | PI 20:2-22:3 | 939.6 | 50 | 307.2 | 50 | 12.06 | ES- | 1 |
| 178 | PI 20:2-22:3 | 939.6 | 50 | 333.2 | 50 | 12.06 | ES- | 2 |
| 179 | PI 20:2-22:4 | 937.6 | 50 | 307.2 | 50 | 12.06 | ES- | 1 |
| 180 | PI 20:2-22:4 | 937.6 | 50 | 331.2 | 50 | 12.06 | ES- | 2 |
| 181 | PI 20:2-22:5 | 935.6 | 50 | 307.2 | 50 | 12.06 | ES- | 1 |
| 182 | PI 20:2-22:5 | 935.6 | 50 | 329.2 | 50 | 12.06 | ES- | 2 |
| 183 | PI 20:2-22:6 | 933.5 | 50 | 307.2 | 50 | 12.06 | ES- | 1 |
| 184 | PI 20:2-22:6 | 933.5 | 50 | 327.2 | 50 | 12.06 | ES- | 2 |
| 185 | PI 20:3-20:3 | 909.5 | 50 | 305.2 | 50 | 12.06 | ES- | 1 |
| 186 | PI 20:3-20:4 | 907.5 | 50 | 303.2 | 50 | 12.06 | ES- | 1 |
| 187 | PI 20:3-20:4 | 907.5 | 50 | 305.2 | 50 | 12.06 | ES- | 2 |
| 188 | PI 20:3-20:5 | 905.5 | 50 | 301.2 | 50 | 12.06 | ES- | 1 |
| 189 | PI 20:3-20:5 | 905.5 | 50 | 305.2 | 50 | 12.06 | ES- | 2 |

Method 8: LPLs, SM, Cer, and FFA

| No | Name     | Precursor | CV (V) | Product | CE (V) | RT setting (min) | IonMode | Ion |
|----|----------|-----------|--------|---------|--------|------------------|---------|-----|
| 1  | LPC 12:0 | 440.3     | 10     | 184.1   | 30     | 6.12             | ES+     | 1   |
| 2  | LPC 14:0 | 468.3     | 10     | 184.1   | 30     | 6.12             | ES+     | 1   |
| 3  | LPC 14:1 | 466.3     | 10     | 184.1   | 30     | 6.12             | ES+     | 1   |
| 4  | LPC 16:0 | 496.3     | 10     | 184.1   | 30     | 6.12             | ES+     | 1   |
| 5  | LPC 16:1 | 494.3     | 10     | 184.1   | 30     | 6.12             | ES+     | 1   |
| 6  | LPC 17:0 | 510.4     | 10     | 184.1   | 30     | 6.12             | ES+     | 1   |
| 7  | LPC 18:0 | 524.4     | 10     | 184.1   | 30     | 6.12             | ES+     | 1   |
| 8  | LPC 18:1 | 522.4     | 10     | 184.1   | 30     | 6.12             | ES+     | 1   |
| 9  | LPC 18:2 | 520.3     | 10     | 184.1   | 30     | 6.12             | ES+     | 1   |

|    |          |       |    |       |    |      |     |   |
|----|----------|-------|----|-------|----|------|-----|---|
| 10 | LPC 18:3 | 518.3 | 10 | 184.1 | 30 | 6.12 | ES+ | 1 |
| 11 | LPC 18:4 | 516.3 | 10 | 184.1 | 30 | 6.12 | ES+ | 1 |
| 12 | LPC 20:0 | 552.4 | 10 | 184.1 | 30 | 6.12 | ES+ | 1 |
| 13 | LPC 20:1 | 550.4 | 10 | 184.1 | 30 | 6.12 | ES+ | 1 |
| 14 | LPC 20:2 | 548.4 | 10 | 184.1 | 30 | 6.12 | ES+ | 1 |
| 15 | LPC 20:3 | 546.4 | 10 | 184.1 | 30 | 6.12 | ES+ | 1 |
| 16 | LPC 20:4 | 544.3 | 10 | 184.1 | 30 | 6.12 | ES+ | 1 |
| 17 | LPC 20:5 | 542.3 | 10 | 184.1 | 30 | 6.12 | ES+ | 1 |
| 18 | LPC 22:0 | 580.4 | 10 | 184.1 | 30 | 6.12 | ES+ | 1 |
| 19 | LPC 22:1 | 578.4 | 10 | 184.1 | 30 | 6.12 | ES+ | 1 |
| 20 | LPC 22:2 | 576.4 | 10 | 184.1 | 30 | 6.12 | ES+ | 1 |
| 21 | LPC 22:3 | 574.4 | 10 | 184.1 | 30 | 6.12 | ES+ | 1 |
| 22 | LPC 22:4 | 572.4 | 10 | 184.1 | 30 | 6.12 | ES+ | 1 |
| 23 | LPC 22:5 | 570.4 | 10 | 184.1 | 30 | 6.12 | ES+ | 1 |
| 24 | LPC 22:6 | 568.3 | 10 | 184.1 | 30 | 6.12 | ES+ | 1 |
| 25 | LPE 12:0 | 398.2 | 30 | 257.1 | 20 | 7.45 | ES+ | 1 |
| 26 | LPE 14:0 | 426.3 | 30 | 285.2 | 20 | 7.45 | ES+ | 1 |
| 27 | LPE 14:1 | 424.2 | 30 | 283.1 | 20 | 7.45 | ES+ | 1 |
| 28 | LPE 16:0 | 454.3 | 30 | 313.2 | 20 | 7.45 | ES+ | 1 |
| 29 | LPE 16:1 | 452.3 | 30 | 311.2 | 20 | 7.45 | ES+ | 1 |
| 30 | LPE 17:1 | 466.3 | 30 | 325.2 | 20 | 7.45 | ES+ | 1 |
| 31 | LPE 18:0 | 482.3 | 30 | 341.2 | 20 | 7.45 | ES+ | 1 |
| 32 | LPE 18:1 | 480.3 | 30 | 339.2 | 20 | 7.45 | ES+ | 1 |
| 33 | LPE 18:2 | 478.3 | 30 | 337.2 | 20 | 7.45 | ES+ | 1 |
| 34 | LPE 18:3 | 476.3 | 30 | 335.2 | 20 | 7.45 | ES+ | 1 |
| 35 | LPE 18:4 | 474.3 | 30 | 333.2 | 20 | 7.45 | ES+ | 1 |
| 36 | LPE 20:0 | 510.4 | 30 | 369.3 | 20 | 7.45 | ES+ | 1 |
| 37 | LPE 20:1 | 508.3 | 30 | 367.2 | 20 | 7.45 | ES+ | 1 |
| 38 | LPE 20:2 | 506.3 | 30 | 365.2 | 20 | 7.45 | ES+ | 1 |
| 39 | LPE 20:3 | 504.3 | 30 | 363.2 | 20 | 7.45 | ES+ | 1 |
| 40 | LPE 20:4 | 502.3 | 30 | 361.2 | 20 | 7.45 | ES+ | 1 |
| 41 | LPE 20:5 | 500.3 | 30 | 359.2 | 20 | 7.45 | ES+ | 1 |
| 42 | LPE 22:0 | 538.4 | 30 | 397.3 | 20 | 7.45 | ES+ | 1 |
| 43 | LPE 22:1 | 536.4 | 30 | 395.3 | 20 | 7.45 | ES+ | 1 |
| 44 | LPE 22:2 | 534.4 | 30 | 393.3 | 20 | 7.45 | ES+ | 1 |

|    |          |       |    |       |    |       |     |   |
|----|----------|-------|----|-------|----|-------|-----|---|
| 45 | LPE 22:3 | 532.3 | 30 | 391.2 | 20 | 7.45  | ES+ | 1 |
| 46 | LPE 22:4 | 530.3 | 30 | 389.2 | 20 | 7.45  | ES+ | 1 |
| 47 | LPE 22:5 | 528.3 | 30 | 387.2 | 20 | 7.45  | ES+ | 1 |
| 48 | LPE 22:6 | 526.3 | 30 | 385.2 | 20 | 7.45  | ES+ | 1 |
| 49 | LPG 12:0 | 429.2 | 40 | 257.2 | 20 | 10.87 | ES+ | 1 |
| 50 | LPG 14:0 | 457.3 | 40 | 285.2 | 20 | 10.87 | ES+ | 1 |
| 51 | LPG 14:1 | 455.2 | 40 | 283.2 | 20 | 10.87 | ES+ | 1 |
| 52 | LPG 16:0 | 485.3 | 40 | 313.3 | 20 | 10.87 | ES+ | 1 |
| 53 | LPG 16:1 | 483.3 | 40 | 311.3 | 20 | 10.87 | ES+ | 1 |
| 54 | LPG 17:1 | 497.3 | 40 | 325.2 | 20 | 10.87 | ES+ | 1 |
| 55 | LPG 18:0 | 513.3 | 40 | 341.3 | 20 | 10.87 | ES+ | 1 |
| 56 | LPG 18:1 | 511.3 | 40 | 339.3 | 20 | 10.87 | ES+ | 1 |
| 57 | LPG 18:2 | 509.3 | 40 | 337.3 | 20 | 10.87 | ES+ | 1 |
| 58 | LPG 18:3 | 507.3 | 40 | 335.3 | 20 | 10.87 | ES+ | 1 |
| 59 | LPG 18:4 | 505.3 | 40 | 333.2 | 20 | 10.87 | ES+ | 1 |
| 60 | LPG 20:0 | 541.3 | 40 | 369.3 | 20 | 10.87 | ES+ | 1 |
| 61 | LPG 20:1 | 539.3 | 40 | 367.3 | 20 | 10.87 | ES+ | 1 |
| 62 | LPG 20:2 | 537.3 | 40 | 365.3 | 20 | 10.87 | ES+ | 1 |
| 63 | LPG 20:3 | 535.3 | 40 | 363.3 | 20 | 10.87 | ES+ | 1 |
| 64 | LPG 20:4 | 533.3 | 40 | 361.3 | 20 | 10.87 | ES+ | 1 |
| 65 | LPG 20:5 | 531.3 | 40 | 359.3 | 20 | 10.87 | ES+ | 1 |
| 66 | LPG 22:0 | 569.4 | 40 | 397.4 | 20 | 10.87 | ES+ | 1 |
| 67 | LPG 22:1 | 567.4 | 40 | 395.3 | 20 | 10.87 | ES+ | 1 |
| 68 | LPG 22:2 | 565.3 | 40 | 393.3 | 20 | 10.87 | ES+ | 1 |
| 69 | LPG 22:3 | 563.3 | 40 | 391.3 | 20 | 10.87 | ES+ | 1 |
| 70 | LPG 22:4 | 561.3 | 40 | 389.3 | 20 | 10.87 | ES+ | 1 |
| 71 | LPG 22:5 | 559.3 | 40 | 387.3 | 20 | 10.87 | ES+ | 1 |
| 72 | LPG 22:6 | 557.3 | 40 | 385.3 | 20 | 10.87 | ES+ | 1 |
| 73 | LPS 12:0 | 442.2 | 30 | 257.1 | 20 | 15.36 | ES+ | 1 |
| 74 | LPS 14:0 | 470.3 | 30 | 285.1 | 20 | 15.36 | ES+ | 1 |
| 75 | LPS 14:1 | 468.2 | 30 | 283.1 | 20 | 15.36 | ES+ | 1 |
| 76 | LPS 16:0 | 498.3 | 30 | 313.2 | 20 | 15.36 | ES+ | 1 |
| 77 | LPS 16:1 | 496.3 | 30 | 311.2 | 20 | 15.36 | ES+ | 1 |
| 78 | LPS 17:1 | 510.3 | 30 | 325.2 | 20 | 15.36 | ES+ | 1 |
| 79 | LPS 18:0 | 526.3 | 30 | 341.2 | 20 | 15.36 | ES+ | 1 |



|     |               |       |    |       |    |       |     |   |
|-----|---------------|-------|----|-------|----|-------|-----|---|
| 80  | LPS 18:1      | 524.3 | 30 | 339.2 | 20 | 15.36 | ES+ | 1 |
| 81  | LPS 18:2      | 522.3 | 30 | 337.2 | 20 | 15.36 | ES+ | 1 |
| 82  | LPS 18:3      | 520.3 | 30 | 335.2 | 20 | 15.36 | ES+ | 1 |
| 83  | LPS 18:4      | 518.3 | 30 | 333.1 | 20 | 15.36 | ES+ | 1 |
| 84  | LPS 20:0      | 554.3 | 30 | 369.2 | 20 | 15.36 | ES+ | 1 |
| 85  | LPS 20:1      | 552.3 | 30 | 367.2 | 20 | 15.36 | ES+ | 1 |
| 86  | LPS 20:2      | 550.3 | 30 | 365.2 | 20 | 15.36 | ES+ | 1 |
| 87  | LPS 20:3      | 548.3 | 30 | 363.2 | 20 | 15.36 | ES+ | 1 |
| 88  | LPS 20:4      | 546.3 | 30 | 361.2 | 20 | 15.36 | ES+ | 1 |
| 89  | LPS 20:5      | 544.3 | 30 | 359.2 | 20 | 15.36 | ES+ | 1 |
| 90  | LPS 22:0      | 582.4 | 30 | 397.3 | 20 | 15.36 | ES+ | 1 |
| 91  | LPS 22:1      | 580.4 | 30 | 395.2 | 20 | 15.36 | ES+ | 1 |
| 92  | LPS 22:2      | 578.3 | 30 | 393.2 | 20 | 15.36 | ES+ | 1 |
| 93  | LPS 22:3      | 576.3 | 30 | 391.2 | 20 | 15.36 | ES+ | 1 |
| 94  | LPS 22:4      | 574.3 | 30 | 389.2 | 20 | 15.36 | ES+ | 1 |
| 95  | LPS 22:5      | 572.3 | 30 | 387.2 | 20 | 15.36 | ES+ | 1 |
| 96  | LPS 22:6      | 570.3 | 30 | 385.2 | 20 | 15.36 | ES+ | 1 |
| 97  | SM d18:1-12:0 | 647.5 | 50 | 184.1 | 30 | 5.83  | ES+ | 1 |
| 98  | SM d18:1-14:0 | 675.5 | 50 | 184.1 | 30 | 5.83  | ES+ | 1 |
| 99  | SM d18:1-14:1 | 673.5 | 50 | 184.1 | 30 | 5.83  | ES+ | 1 |
| 100 | SM d18:1-16:0 | 703.6 | 50 | 184.1 | 30 | 5.83  | ES+ | 1 |
| 101 | SM d18:1-16:1 | 701.6 | 50 | 184.1 | 30 | 5.83  | ES+ | 1 |
| 102 | SM d18:1-17:0 | 717.6 | 50 | 184.1 | 30 | 5.83  | ES+ | 1 |
| 103 | SM d18:1-18:0 | 731.6 | 50 | 184.1 | 30 | 5.83  | ES+ | 1 |
| 104 | SM d18:1-18:1 | 729.6 | 50 | 184.1 | 30 | 5.83  | ES+ | 1 |
| 105 | SM d18:1-18:2 | 727.6 | 50 | 184.1 | 30 | 5.83  | ES+ | 1 |
| 106 | SM d18:1-18:3 | 725.6 | 50 | 184.1 | 30 | 5.83  | ES+ | 1 |
| 107 | SM d18:1-18:4 | 723.5 | 50 | 184.1 | 30 | 5.83  | ES+ | 1 |
| 108 | SM d18:1-20:0 | 759.6 | 50 | 184.1 | 30 | 5.83  | ES+ | 1 |
| 109 | SM d18:1-20:1 | 757.6 | 50 | 184.1 | 30 | 5.83  | ES+ | 1 |
| 110 | SM d18:1-20:2 | 755.6 | 50 | 184.1 | 30 | 5.83  | ES+ | 1 |
| 111 | SM d18:1-20:3 | 753.6 | 50 | 184.1 | 30 | 5.83  | ES+ | 1 |
| 112 | SM d18:1-20:4 | 751.6 | 50 | 184.1 | 30 | 5.83  | ES+ | 1 |
| 113 | SM d18:1-20:5 | 749.6 | 50 | 184.1 | 30 | 5.83  | ES+ | 1 |
| 114 | SM d18:1-22:0 | 787.7 | 50 | 184.1 | 30 | 5.83  | ES+ | 1 |

|     |                |       |    |       |    |      |     |   |
|-----|----------------|-------|----|-------|----|------|-----|---|
| 115 | SM d18:1-22:1  | 785.7 | 50 | 184.1 | 30 | 5.83 | ES+ | 1 |
| 116 | SM d18:1-22:2  | 783.6 | 50 | 184.1 | 30 | 5.83 | ES+ | 1 |
| 117 | SM d18:1-22:3  | 781.6 | 50 | 184.1 | 30 | 5.83 | ES+ | 1 |
| 118 | SM d18:1-22:4  | 779.6 | 50 | 184.1 | 30 | 5.83 | ES+ | 1 |
| 119 | SM d18:1-22:5  | 777.6 | 50 | 184.1 | 30 | 5.83 | ES+ | 1 |
| 120 | SM d18:1-22:6  | 775.6 | 50 | 184.1 | 30 | 5.83 | ES+ | 1 |
| 121 | Cer d18:1-12:0 | 482.5 | 20 | 264.3 | 30 | 4.48 | ES+ | 1 |
| 122 | Cer d18:1-14:0 | 510.5 | 20 | 264.3 | 30 | 4.48 | ES+ | 1 |
| 123 | Cer d18:1-14:1 | 508.5 | 20 | 264.3 | 30 | 4.48 | ES+ | 1 |
| 124 | Cer d18:1-16:0 | 538.5 | 20 | 264.3 | 30 | 4.48 | ES+ | 1 |
| 125 | Cer d18:1-16:1 | 536.5 | 20 | 264.3 | 30 | 4.48 | ES+ | 1 |
| 126 | Cer d18:1-17:0 | 552.5 | 20 | 264.3 | 30 | 4.48 | ES+ | 1 |
| 127 | Cer d18:1-18:0 | 566.6 | 20 | 264.3 | 30 | 4.48 | ES+ | 1 |
| 128 | Cer d18:1-18:1 | 564.5 | 20 | 264.3 | 30 | 4.48 | ES+ | 1 |
| 129 | Cer d18:1-18:2 | 562.5 | 20 | 264.3 | 30 | 4.48 | ES+ | 1 |
| 130 | Cer d18:1-18:3 | 560.5 | 20 | 264.3 | 30 | 4.48 | ES+ | 1 |
| 131 | Cer d18:1-18:4 | 558.5 | 20 | 264.3 | 30 | 4.48 | ES+ | 1 |
| 132 | Cer d18:1-20:0 | 594.6 | 20 | 264.3 | 30 | 4.48 | ES+ | 1 |
| 133 | Cer d18:1-20:1 | 592.6 | 20 | 264.3 | 30 | 4.48 | ES+ | 1 |
| 134 | Cer d18:1-20:2 | 590.6 | 20 | 264.3 | 30 | 4.48 | ES+ | 1 |
| 135 | Cer d18:1-20:3 | 588.5 | 20 | 264.3 | 30 | 4.48 | ES+ | 1 |
| 136 | Cer d18:1-20:4 | 586.5 | 20 | 264.3 | 30 | 4.48 | ES+ | 1 |
| 137 | Cer d18:1-20:5 | 584.5 | 20 | 264.3 | 30 | 4.48 | ES+ | 1 |
| 138 | Cer d18:1-22:0 | 622.6 | 20 | 264.3 | 30 | 4.48 | ES+ | 1 |
| 139 | Cer d18:1-22:1 | 620.6 | 20 | 264.3 | 30 | 4.48 | ES+ | 1 |
| 140 | Cer d18:1-22:2 | 618.6 | 20 | 264.3 | 30 | 4.48 | ES+ | 1 |
| 141 | Cer d18:1-22:3 | 616.6 | 20 | 264.3 | 30 | 4.48 | ES+ | 1 |
| 142 | Cer d18:1-22:4 | 614.6 | 20 | 264.3 | 30 | 4.48 | ES+ | 1 |
| 143 | Cer d18:1-22:5 | 612.5 | 20 | 264.3 | 30 | 4.48 | ES+ | 1 |
| 144 | Cer d18:1-22:6 | 610.5 | 20 | 264.3 | 30 | 4.48 | ES+ | 1 |
| 145 | CE 12:0        | 586.6 | 20 | 369.3 | 10 | 1.12 | ES+ | 1 |
| 146 | CE 14:0        | 614.6 | 20 | 369.3 | 10 | 1.12 | ES+ | 1 |
| 147 | CE 14:1        | 612.6 | 20 | 369.3 | 10 | 1.12 | ES+ | 1 |
| 148 | CE 16:0        | 642.6 | 20 | 369.3 | 10 | 1.12 | ES+ | 1 |
| 149 | CE 16:1        | 640.6 | 20 | 369.3 | 10 | 1.12 | ES+ | 1 |

|     |          |       |    |       |    |      |     |   |
|-----|----------|-------|----|-------|----|------|-----|---|
| 150 | CE 17:0  | 656.6 | 20 | 369.3 | 10 | 1.12 | ES+ | 1 |
| 151 | CE 18:0  | 670.6 | 20 | 369.3 | 10 | 1.12 | ES+ | 1 |
| 152 | CE 18:1  | 668.6 | 20 | 369.3 | 10 | 1.12 | ES+ | 1 |
| 153 | CE 18:2  | 666.6 | 20 | 369.3 | 10 | 1.12 | ES+ | 1 |
| 154 | CE 18:3  | 664.6 | 20 | 369.3 | 10 | 1.12 | ES+ | 1 |
| 155 | CE 18:4  | 662.6 | 20 | 369.3 | 10 | 1.12 | ES+ | 1 |
| 156 | CE 20:0  | 698.7 | 20 | 369.3 | 10 | 1.12 | ES+ | 1 |
| 157 | CE 20:1  | 696.7 | 20 | 369.3 | 10 | 1.12 | ES+ | 1 |
| 158 | CE 20:2  | 694.6 | 20 | 369.3 | 10 | 1.12 | ES+ | 1 |
| 159 | CE 20:3  | 692.6 | 20 | 369.3 | 10 | 1.12 | ES+ | 1 |
| 160 | CE 20:4  | 690.6 | 20 | 369.3 | 10 | 1.12 | ES+ | 1 |
| 161 | CE 20:5  | 688.6 | 20 | 369.3 | 10 | 1.12 | ES+ | 1 |
| 162 | CE 22:0  | 726.7 | 20 | 369.3 | 10 | 1.12 | ES+ | 1 |
| 163 | CE 22:1  | 724.7 | 20 | 369.3 | 10 | 1.12 | ES+ | 1 |
| 164 | CE 22:2  | 722.7 | 20 | 369.3 | 10 | 1.12 | ES+ | 1 |
| 165 | CE 22:3  | 720.7 | 20 | 369.3 | 10 | 1.12 | ES+ | 1 |
| 166 | CE 22:4  | 718.6 | 20 | 369.3 | 10 | 1.12 | ES+ | 1 |
| 167 | CE 22:5  | 716.6 | 20 | 369.3 | 10 | 1.12 | ES+ | 1 |
| 168 | CE 22:6  | 714.6 | 20 | 369.3 | 10 | 1.12 | ES+ | 1 |
| 169 | MAG 12:0 | 275.2 | 10 | 257.2 | 10 | 3.97 | ES+ | 1 |
| 170 | MAG 14:0 | 303.3 | 10 | 285.3 | 10 | 3.97 | ES+ | 1 |
| 171 | MAG 14:1 | 301.3 | 10 | 283.3 | 10 | 3.97 | ES+ | 1 |
| 172 | MAG 16:0 | 331.3 | 10 | 313.3 | 10 | 3.97 | ES+ | 1 |
| 173 | MAG 16:1 | 329.3 | 10 | 311.3 | 10 | 3.97 | ES+ | 1 |
| 174 | MAG 17:0 | 345.3 | 10 | 327.3 | 10 | 3.97 | ES+ | 1 |
| 175 | MAG 18:0 | 359.3 | 10 | 341.3 | 10 | 3.97 | ES+ | 1 |
| 176 | MAG 18:1 | 357.3 | 10 | 339.3 | 10 | 3.97 | ES+ | 1 |
| 177 | MAG 18:2 | 355.3 | 10 | 337.3 | 10 | 3.97 | ES+ | 1 |
| 178 | MAG 18:3 | 353.3 | 10 | 335.3 | 10 | 3.97 | ES+ | 1 |
| 179 | MAG 18:4 | 351.3 | 10 | 333.3 | 10 | 3.97 | ES+ | 1 |
| 180 | MAG 20:0 | 387.4 | 10 | 369.4 | 10 | 3.97 | ES+ | 1 |
| 181 | MAG 20:1 | 385.4 | 10 | 367.4 | 10 | 3.97 | ES+ | 1 |
| 182 | MAG 20:2 | 383.3 | 10 | 365.3 | 10 | 3.97 | ES+ | 1 |
| 183 | MAG 20:3 | 381.3 | 10 | 363.3 | 10 | 3.97 | ES+ | 1 |
| 184 | MAG 20:4 | 379.3 | 10 | 361.3 | 10 | 3.97 | ES+ | 1 |

|     |          |       |    |       |    |       |     |   |
|-----|----------|-------|----|-------|----|-------|-----|---|
| 185 | MAG 20:5 | 377.3 | 10 | 359.3 | 10 | 3.97  | ES+ | 1 |
| 186 | MAG 22:0 | 415.4 | 10 | 397.4 | 10 | 3.97  | ES+ | 1 |
| 187 | MAG 22:1 | 413.4 | 10 | 395.4 | 10 | 3.97  | ES+ | 1 |
| 188 | MAG 22:2 | 411.4 | 10 | 393.4 | 10 | 3.97  | ES+ | 1 |
| 189 | MAG 22:3 | 409.4 | 10 | 391.4 | 10 | 3.97  | ES+ | 1 |
| 190 | MAG 22:4 | 407.3 | 10 | 389.3 | 10 | 3.97  | ES+ | 1 |
| 191 | MAG 22:5 | 405.3 | 10 | 387.3 | 10 | 3.97  | ES+ | 1 |
| 192 | MAG 22:6 | 403.3 | 10 | 385.3 | 10 | 3.97  | ES+ | 1 |
| 193 | LPI 12:0 | 515.2 | 10 | 240.9 | 40 | 14.02 | ES- | 1 |
| 194 | LPI 14:0 | 543.3 | 10 | 240.9 | 40 | 14.02 | ES- | 1 |
| 195 | LPI 14:1 | 541.2 | 10 | 240.9 | 40 | 14.02 | ES- | 1 |
| 196 | LPI 16:0 | 571.3 | 10 | 240.9 | 40 | 14.02 | ES- | 1 |
| 197 | LPI 16:1 | 569.3 | 10 | 240.9 | 40 | 14.02 | ES- | 1 |
| 198 | LPI 17:1 | 583.3 | 10 | 240.9 | 40 | 14.02 | ES- | 1 |
| 199 | LPI 18:0 | 599.3 | 10 | 240.9 | 40 | 14.02 | ES- | 1 |
| 200 | LPI 18:1 | 597.3 | 10 | 240.9 | 40 | 14.02 | ES- | 1 |
| 201 | LPI 18:2 | 595.3 | 10 | 240.9 | 40 | 14.02 | ES- | 1 |
| 202 | LPI 18:3 | 593.3 | 10 | 240.9 | 40 | 14.02 | ES- | 1 |
| 203 | LPI 18:4 | 591.3 | 10 | 240.9 | 40 | 14.02 | ES- | 1 |
| 204 | LPI 20:0 | 627.4 | 10 | 240.9 | 40 | 14.02 | ES- | 1 |
| 205 | LPI 20:1 | 625.3 | 10 | 240.9 | 40 | 14.02 | ES- | 1 |
| 206 | LPI 20:2 | 623.3 | 10 | 240.9 | 40 | 14.02 | ES- | 1 |
| 207 | LPI 20:3 | 621.3 | 10 | 240.9 | 40 | 14.02 | ES- | 1 |
| 208 | LPI 20:4 | 619.3 | 10 | 240.9 | 40 | 14.02 | ES- | 1 |
| 209 | LPI 20:5 | 617.3 | 10 | 240.9 | 40 | 14.02 | ES- | 1 |
| 210 | LPI 22:0 | 655.4 | 10 | 240.9 | 40 | 14.02 | ES- | 1 |
| 211 | LPI 22:1 | 653.4 | 10 | 240.9 | 40 | 14.02 | ES- | 1 |
| 212 | LPI 22:2 | 651.4 | 10 | 240.9 | 40 | 14.02 | ES- | 1 |
| 213 | LPI 22:3 | 649.3 | 10 | 240.9 | 40 | 14.02 | ES- | 1 |
| 214 | LPI 22:4 | 647.3 | 10 | 240.9 | 40 | 14.02 | ES- | 1 |
| 215 | LPI 22:5 | 645.3 | 10 | 240.9 | 40 | 14.02 | ES- | 1 |
| 216 | LPI 22:6 | 643.3 | 10 | 240.9 | 40 | 14.02 | ES- | 1 |
| 217 | LPA 12:0 | 353.2 | 10 | 152.8 | 20 | 17.43 | ES- | 1 |
| 218 | LPA 14:0 | 381.2 | 10 | 152.8 | 20 | 17.43 | ES- | 1 |
| 219 | LPA 14:1 | 379.2 | 10 | 152.8 | 20 | 17.43 | ES- | 1 |

|     |          |       |    |       |    |       |     |   |
|-----|----------|-------|----|-------|----|-------|-----|---|
| 220 | LPA 16:0 | 409.2 | 10 | 152.8 | 20 | 17.43 | ES- | 1 |
| 221 | LPA 16:1 | 407.2 | 10 | 152.8 | 20 | 17.43 | ES- | 1 |
| 222 | LPA 17:0 | 423.3 | 10 | 152.8 | 20 | 17.43 | ES- | 1 |
| 223 | LPA 18:0 | 437.3 | 10 | 152.8 | 20 | 17.43 | ES- | 1 |
| 224 | LPA 18:1 | 435.3 | 10 | 152.8 | 20 | 17.43 | ES- | 1 |
| 225 | LPA 18:2 | 433.2 | 10 | 152.8 | 20 | 17.43 | ES- | 1 |
| 226 | LPA 18:3 | 431.2 | 10 | 152.8 | 20 | 17.43 | ES- | 1 |
| 227 | LPA 18:4 | 429.2 | 10 | 152.8 | 20 | 17.43 | ES- | 1 |
| 228 | LPA 20:0 | 465.3 | 10 | 152.8 | 20 | 17.43 | ES- | 1 |
| 229 | LPA 20:1 | 463.3 | 10 | 152.8 | 20 | 17.43 | ES- | 1 |
| 230 | LPA 20:2 | 461.3 | 10 | 152.8 | 20 | 17.43 | ES- | 1 |
| 231 | LPA 20:3 | 459.3 | 10 | 152.8 | 20 | 17.43 | ES- | 1 |
| 232 | LPA 20:4 | 457.2 | 10 | 152.8 | 20 | 17.43 | ES- | 1 |
| 233 | LPA 20:5 | 455.2 | 10 | 152.8 | 20 | 17.43 | ES- | 1 |
| 234 | LPA 22:0 | 493.3 | 10 | 152.8 | 20 | 17.43 | ES- | 1 |
| 235 | LPA 22:1 | 491.3 | 10 | 152.8 | 20 | 17.43 | ES- | 1 |
| 236 | LPA 22:2 | 489.3 | 10 | 152.8 | 20 | 17.43 | ES- | 1 |
| 237 | LPA 22:3 | 487.3 | 10 | 152.8 | 20 | 17.43 | ES- | 1 |
| 238 | LPA 22:4 | 485.3 | 10 | 152.8 | 20 | 17.43 | ES- | 1 |
| 239 | LPA 22:5 | 483.3 | 10 | 152.8 | 20 | 17.43 | ES- | 1 |
| 240 | LPA 22:6 | 481.2 | 10 | 152.8 | 20 | 17.43 | ES- | 1 |
| 241 | FFA 12:0 | 199.2 | 10 | 199.2 | 10 | 4.02  | ES- | 1 |
| 242 | FFA 14:0 | 227.2 | 10 | 227.2 | 10 | 4.02  | ES- | 1 |
| 243 | FFA 14:1 | 225.2 | 10 | 225.2 | 10 | 4.02  | ES- | 1 |
| 244 | FFA 16:0 | 255.2 | 10 | 255.2 | 10 | 4.02  | ES- | 1 |
| 245 | FFA 16:1 | 253.2 | 10 | 253.2 | 10 | 4.02  | ES- | 1 |
| 246 | FFA 17:0 | 269.2 | 10 | 269.2 | 10 | 4.02  | ES- | 1 |
| 247 | FFA 18:0 | 283.3 | 10 | 283.3 | 10 | 4.02  | ES- | 1 |
| 248 | FFA 18:1 | 281.2 | 10 | 281.2 | 10 | 4.02  | ES- | 1 |
| 249 | FFA 18:2 | 279.2 | 10 | 279.2 | 10 | 4.02  | ES- | 1 |
| 250 | FFA 18:3 | 277.2 | 10 | 277.2 | 10 | 4.02  | ES- | 1 |
| 251 | FFA 18:4 | 275.2 | 10 | 275.2 | 10 | 4.02  | ES- | 1 |
| 252 | FFA 20:0 | 311.3 | 10 | 311.3 | 10 | 4.02  | ES- | 1 |
| 253 | FFA 20:1 | 309.3 | 10 | 309.3 | 10 | 4.02  | ES- | 1 |
| 254 | FFA 20:2 | 307.3 | 10 | 307.3 | 10 | 4.02  | ES- | 1 |

|     |          |       |    |       |    |      |     |   |
|-----|----------|-------|----|-------|----|------|-----|---|
| 255 | FFA 20:3 | 305.2 | 10 | 305.2 | 10 | 4.02 | ES- | 1 |
| 256 | FFA 20:4 | 303.2 | 10 | 303.2 | 10 | 4.02 | ES- | 1 |
| 257 | FFA 20:5 | 301.2 | 10 | 301.2 | 10 | 4.02 | ES- | 1 |
| 258 | FFA 22:0 | 339.3 | 10 | 339.3 | 10 | 4.02 | ES- | 1 |
| 259 | FFA 22:1 | 337.3 | 10 | 337.3 | 10 | 4.02 | ES- | 1 |
| 260 | FFA 22:2 | 335.3 | 10 | 335.3 | 10 | 4.02 | ES- | 1 |
| 261 | FFA 22:3 | 333.3 | 10 | 333.3 | 10 | 4.02 | ES- | 1 |
| 262 | FFA 22:4 | 331.3 | 10 | 331.3 | 10 | 4.02 | ES- | 1 |
| 263 | FFA 22:5 | 329.2 | 10 | 329.2 | 10 | 4.02 | ES- | 1 |
| 264 | FFA 22:6 | 327.2 | 10 | 327.2 | 10 | 4.02 | ES- | 1 |

Method 9: PC, PE, PG, and PS (1)

| No | Name         | Precursor | CV (V) | Product | CE (V) | RT setting (min) | IonMode | Ion |
|----|--------------|-----------|--------|---------|--------|------------------|---------|-----|
| 1  | PC 12:0-12:0 | 680.5     | 15     | 199.3   | 40     | 5.46             | ES-     | 1   |
| 2  | PC 12:0-14:0 | 708.5     | 15     | 199.3   | 40     | 5.46             | ES-     | 1   |
| 3  | PC 12:0-14:0 | 708.5     | 15     | 227.3   | 40     | 5.46             | ES-     | 2   |
| 4  | PC 12:0-14:1 | 706.5     | 15     | 199.3   | 40     | 5.46             | ES-     | 1   |
| 5  | PC 12:0-14:1 | 706.5     | 15     | 225.3   | 40     | 5.46             | ES-     | 2   |
| 6  | PC 12:0-16:0 | 736.5     | 15     | 199.3   | 40     | 5.46             | ES-     | 1   |
| 7  | PC 12:0-16:0 | 736.5     | 15     | 255.3   | 40     | 5.46             | ES-     | 2   |
| 8  | PC 12:0-16:1 | 734.5     | 15     | 199.3   | 40     | 5.46             | ES-     | 1   |
| 9  | PC 12:0-16:1 | 734.5     | 15     | 253.3   | 40     | 5.46             | ES-     | 2   |
| 10 | PC 12:0-18:0 | 764.5     | 15     | 199.3   | 40     | 5.46             | ES-     | 1   |
| 11 | PC 12:0-18:0 | 764.5     | 15     | 283.3   | 40     | 5.46             | ES-     | 2   |
| 12 | PC 12:0-18:1 | 762.5     | 15     | 199.3   | 40     | 5.46             | ES-     | 1   |
| 13 | PC 12:0-18:1 | 762.5     | 15     | 281.3   | 40     | 5.46             | ES-     | 2   |
| 14 | PC 12:0-18:2 | 760.5     | 15     | 199.3   | 40     | 5.46             | ES-     | 1   |
| 15 | PC 12:0-18:2 | 760.5     | 15     | 279.3   | 40     | 5.46             | ES-     | 2   |
| 16 | PC 12:0-18:3 | 758.5     | 15     | 199.3   | 40     | 5.46             | ES-     | 1   |
| 17 | PC 12:0-18:3 | 758.5     | 15     | 277.3   | 40     | 5.46             | ES-     | 2   |
| 18 | PC 12:0-18:4 | 756.5     | 15     | 199.3   | 40     | 5.46             | ES-     | 1   |
| 19 | PC 12:0-18:4 | 756.5     | 15     | 275.3   | 40     | 5.46             | ES-     | 2   |
| 20 | PC 12:0-20:0 | 792.6     | 15     | 199.3   | 40     | 5.46             | ES-     | 1   |
| 21 | PC 12:0-20:0 | 792.6     | 15     | 311.2   | 40     | 5.46             | ES-     | 2   |
| 22 | PC 12:0-20:1 | 790.6     | 15     | 199.3   | 40     | 5.46             | ES-     | 1   |
| 23 | PC 12:0-20:1 | 790.6     | 15     | 309.2   | 40     | 5.46             | ES-     | 2   |

|    |              |       |    |       |    |      |     |   |
|----|--------------|-------|----|-------|----|------|-----|---|
| 24 | PC 12:0-20:2 | 788.5 | 15 | 199.3 | 40 | 5.46 | ES- | 1 |
| 25 | PC 12:0-20:2 | 788.5 | 15 | 307.2 | 40 | 5.46 | ES- | 2 |
| 26 | PC 12:0-20:3 | 786.5 | 15 | 199.3 | 40 | 5.46 | ES- | 1 |
| 27 | PC 12:0-20:3 | 786.5 | 15 | 305.2 | 40 | 5.46 | ES- | 2 |
| 28 | PC 12:0-20:4 | 784.5 | 15 | 199.3 | 40 | 5.46 | ES- | 1 |
| 29 | PC 12:0-20:4 | 784.5 | 15 | 303.2 | 40 | 5.46 | ES- | 2 |
| 30 | PC 12:0-20:5 | 782.5 | 15 | 199.3 | 40 | 5.46 | ES- | 1 |
| 31 | PC 12:0-20:5 | 782.5 | 15 | 301.2 | 40 | 5.46 | ES- | 2 |
| 32 | PC 12:0-22:0 | 820.6 | 15 | 199.3 | 40 | 5.46 | ES- | 1 |
| 33 | PC 12:0-22:0 | 820.6 | 15 | 339.2 | 40 | 5.46 | ES- | 2 |
| 34 | PC 12:0-22:1 | 818.6 | 15 | 199.3 | 40 | 5.46 | ES- | 1 |
| 35 | PC 12:0-22:1 | 818.6 | 15 | 337.2 | 40 | 5.46 | ES- | 2 |
| 36 | PC 12:0-22:2 | 816.6 | 15 | 199.3 | 40 | 5.46 | ES- | 1 |
| 37 | PC 12:0-22:2 | 816.6 | 15 | 335.2 | 40 | 5.46 | ES- | 2 |
| 38 | PC 12:0-22:3 | 814.6 | 15 | 199.3 | 40 | 5.46 | ES- | 1 |
| 39 | PC 12:0-22:3 | 814.6 | 15 | 333.2 | 40 | 5.46 | ES- | 2 |
| 40 | PC 12:0-22:4 | 812.5 | 15 | 199.3 | 40 | 5.46 | ES- | 1 |
| 41 | PC 12:0-22:4 | 812.5 | 15 | 331.2 | 40 | 5.46 | ES- | 2 |
| 42 | PC 12:0-22:5 | 810.5 | 15 | 199.3 | 40 | 5.46 | ES- | 1 |
| 43 | PC 12:0-22:5 | 810.5 | 15 | 329.2 | 40 | 5.46 | ES- | 2 |
| 44 | PC 12:0-22:6 | 808.5 | 15 | 199.3 | 40 | 5.46 | ES- | 1 |
| 45 | PC 12:0-22:6 | 808.5 | 15 | 327.2 | 40 | 5.46 | ES- | 2 |
| 46 | PC 14:0-14:0 | 736.5 | 15 | 227.3 | 40 | 5.46 | ES- | 1 |
| 47 | PC 14:0-14:1 | 734.5 | 15 | 225.3 | 40 | 5.46 | ES- | 1 |
| 48 | PC 14:0-14:1 | 734.5 | 15 | 227.3 | 40 | 5.46 | ES- | 2 |
| 49 | PC 14:0-16:0 | 764.5 | 15 | 227.3 | 40 | 5.46 | ES- | 1 |
| 50 | PC 14:0-16:0 | 764.5 | 15 | 255.3 | 40 | 5.46 | ES- | 2 |
| 51 | PC 14:0-16:1 | 762.5 | 15 | 227.3 | 40 | 5.46 | ES- | 1 |
| 52 | PC 14:0-16:1 | 762.5 | 15 | 253.3 | 40 | 5.46 | ES- | 2 |
| 53 | PC 14:0-18:0 | 792.6 | 15 | 227.3 | 40 | 5.46 | ES- | 1 |
| 54 | PC 14:0-18:0 | 792.6 | 15 | 283.3 | 40 | 5.46 | ES- | 2 |
| 55 | PC 14:0-18:1 | 790.6 | 15 | 227.3 | 40 | 5.46 | ES- | 1 |
| 56 | PC 14:0-18:1 | 790.6 | 15 | 281.3 | 40 | 5.46 | ES- | 2 |
| 57 | PC 14:0-18:2 | 788.5 | 15 | 227.3 | 40 | 5.46 | ES- | 1 |
| 58 | PC 14:0-18:2 | 788.5 | 15 | 279.3 | 40 | 5.46 | ES- | 2 |

|    |              |       |    |       |    |      |     |   |
|----|--------------|-------|----|-------|----|------|-----|---|
| 59 | PC 14:0-18:3 | 786.5 | 15 | 227.3 | 40 | 5.46 | ES- | 1 |
| 60 | PC 14:0-18:3 | 786.5 | 15 | 277.3 | 40 | 5.46 | ES- | 2 |
| 61 | PC 14:0-18:4 | 784.5 | 15 | 227.3 | 40 | 5.46 | ES- | 1 |
| 62 | PC 14:0-18:4 | 784.5 | 15 | 275.3 | 40 | 5.46 | ES- | 2 |
| 63 | PC 14:0-20:0 | 820.6 | 15 | 227.3 | 40 | 5.46 | ES- | 1 |
| 64 | PC 14:0-20:0 | 820.6 | 15 | 311.2 | 40 | 5.46 | ES- | 2 |
| 65 | PC 14:0-20:1 | 818.6 | 15 | 227.3 | 40 | 5.46 | ES- | 1 |
| 66 | PC 14:0-20:1 | 818.6 | 15 | 309.2 | 40 | 5.46 | ES- | 2 |
| 67 | PC 14:0-20:2 | 816.6 | 15 | 227.3 | 40 | 5.46 | ES- | 1 |
| 68 | PC 14:0-20:2 | 816.6 | 15 | 307.2 | 40 | 5.46 | ES- | 2 |
| 69 | PC 14:0-20:3 | 814.6 | 15 | 227.3 | 40 | 5.46 | ES- | 1 |
| 70 | PC 14:0-20:3 | 814.6 | 15 | 305.2 | 40 | 5.46 | ES- | 2 |
| 71 | PC 14:0-20:4 | 812.5 | 15 | 227.3 | 40 | 5.46 | ES- | 1 |
| 72 | PC 14:0-20:4 | 812.5 | 15 | 303.2 | 40 | 5.46 | ES- | 2 |
| 73 | PC 14:0-20:5 | 810.5 | 15 | 227.3 | 40 | 5.46 | ES- | 1 |
| 74 | PC 14:0-20:5 | 810.5 | 15 | 301.2 | 40 | 5.46 | ES- | 2 |
| 75 | PC 14:0-22:0 | 848.6 | 15 | 227.3 | 40 | 5.46 | ES- | 1 |
| 76 | PC 14:0-22:0 | 848.6 | 15 | 339.2 | 40 | 5.46 | ES- | 2 |
| 77 | PC 14:0-22:1 | 846.6 | 15 | 227.3 | 40 | 5.46 | ES- | 1 |
| 78 | PC 14:0-22:1 | 846.6 | 15 | 337.2 | 40 | 5.46 | ES- | 2 |
| 79 | PC 14:0-22:2 | 844.6 | 15 | 227.3 | 40 | 5.46 | ES- | 1 |
| 80 | PC 14:0-22:2 | 844.6 | 15 | 335.2 | 40 | 5.46 | ES- | 2 |
| 81 | PC 14:0-22:3 | 842.6 | 15 | 227.3 | 40 | 5.46 | ES- | 1 |
| 82 | PC 14:0-22:3 | 842.6 | 15 | 333.2 | 40 | 5.46 | ES- | 2 |
| 83 | PC 14:0-22:4 | 840.6 | 15 | 227.3 | 40 | 5.46 | ES- | 1 |
| 84 | PC 14:0-22:4 | 840.6 | 15 | 331.2 | 40 | 5.46 | ES- | 2 |
| 85 | PC 14:0-22:5 | 838.6 | 15 | 227.3 | 40 | 5.46 | ES- | 1 |
| 86 | PC 14:0-22:5 | 838.6 | 15 | 329.2 | 40 | 5.46 | ES- | 2 |
| 87 | PC 14:0-22:6 | 836.5 | 15 | 227.3 | 40 | 5.46 | ES- | 1 |
| 88 | PC 14:0-22:6 | 836.5 | 15 | 327.2 | 40 | 5.46 | ES- | 2 |
| 89 | PC 14:1-14:1 | 732.5 | 15 | 225.3 | 40 | 5.46 | ES- | 1 |
| 90 | PC 14:1-16:0 | 762.5 | 15 | 225.3 | 40 | 5.46 | ES- | 1 |
| 91 | PC 14:1-16:0 | 762.5 | 15 | 255.3 | 40 | 5.46 | ES- | 2 |
| 92 | PC 14:1-16:1 | 760.5 | 15 | 225.3 | 40 | 5.46 | ES- | 1 |
| 93 | PC 14:1-16:1 | 760.5 | 15 | 253.3 | 40 | 5.46 | ES- | 2 |



|     |              |       |    |       |    |      |     |   |
|-----|--------------|-------|----|-------|----|------|-----|---|
| 94  | PC 14:1-18:0 | 790.6 | 15 | 225.3 | 40 | 5.46 | ES- | 1 |
| 95  | PC 14:1-18:0 | 790.6 | 15 | 283.3 | 40 | 5.46 | ES- | 2 |
| 96  | PC 14:1-18:1 | 788.5 | 15 | 225.3 | 40 | 5.46 | ES- | 1 |
| 97  | PC 14:1-18:1 | 788.5 | 15 | 281.3 | 40 | 5.46 | ES- | 2 |
| 98  | PC 14:1-18:2 | 786.5 | 15 | 225.3 | 40 | 5.46 | ES- | 1 |
| 99  | PC 14:1-18:2 | 786.5 | 15 | 279.3 | 40 | 5.46 | ES- | 2 |
| 100 | PC 14:1-18:3 | 784.5 | 15 | 225.3 | 40 | 5.46 | ES- | 1 |
| 101 | PC 14:1-18:3 | 784.5 | 15 | 277.3 | 40 | 5.46 | ES- | 2 |
| 102 | PC 14:1-18:4 | 782.5 | 15 | 225.3 | 40 | 5.46 | ES- | 1 |
| 103 | PC 14:1-18:4 | 782.5 | 15 | 275.3 | 40 | 5.46 | ES- | 2 |
| 104 | PC 14:1-20:0 | 818.6 | 15 | 225.3 | 40 | 5.46 | ES- | 1 |
| 105 | PC 14:1-20:0 | 818.6 | 15 | 311.2 | 40 | 5.46 | ES- | 2 |
| 106 | PC 14:1-20:1 | 816.6 | 15 | 225.3 | 40 | 5.46 | ES- | 1 |
| 107 | PC 14:1-20:1 | 816.6 | 15 | 309.2 | 40 | 5.46 | ES- | 2 |
| 108 | PC 14:1-20:2 | 814.6 | 15 | 225.3 | 40 | 5.46 | ES- | 1 |
| 109 | PC 14:1-20:2 | 814.6 | 15 | 307.2 | 40 | 5.46 | ES- | 2 |
| 110 | PC 14:1-20:3 | 812.5 | 15 | 225.3 | 40 | 5.46 | ES- | 1 |
| 111 | PC 14:1-20:3 | 812.5 | 15 | 305.2 | 40 | 5.46 | ES- | 2 |
| 112 | PC 14:1-20:4 | 810.5 | 15 | 225.3 | 40 | 5.46 | ES- | 1 |
| 113 | PC 14:1-20:4 | 810.5 | 15 | 303.2 | 40 | 5.46 | ES- | 2 |
| 114 | PC 14:1-20:5 | 808.5 | 15 | 225.3 | 40 | 5.46 | ES- | 1 |
| 115 | PC 14:1-20:5 | 808.5 | 15 | 301.2 | 40 | 5.46 | ES- | 2 |
| 116 | PC 14:1-22:0 | 846.6 | 15 | 225.3 | 40 | 5.46 | ES- | 1 |
| 117 | PC 14:1-22:0 | 846.6 | 15 | 339.2 | 40 | 5.46 | ES- | 2 |
| 118 | PC 14:1-22:1 | 844.6 | 15 | 225.3 | 40 | 5.46 | ES- | 1 |
| 119 | PC 14:1-22:1 | 844.6 | 15 | 337.2 | 40 | 5.46 | ES- | 2 |
| 120 | PC 14:1-22:2 | 842.6 | 15 | 225.3 | 40 | 5.46 | ES- | 1 |
| 121 | PC 14:1-22:2 | 842.6 | 15 | 335.2 | 40 | 5.46 | ES- | 2 |
| 122 | PC 14:1-22:3 | 840.6 | 15 | 225.3 | 40 | 5.46 | ES- | 1 |
| 123 | PC 14:1-22:3 | 840.6 | 15 | 333.2 | 40 | 5.46 | ES- | 2 |
| 124 | PC 14:1-22:4 | 838.6 | 15 | 225.3 | 40 | 5.46 | ES- | 1 |
| 125 | PC 14:1-22:4 | 838.6 | 15 | 331.2 | 40 | 5.46 | ES- | 2 |
| 126 | PC 14:1-22:5 | 836.5 | 15 | 225.3 | 40 | 5.46 | ES- | 1 |
| 127 | PC 14:1-22:5 | 836.5 | 15 | 329.2 | 40 | 5.46 | ES- | 2 |
| 128 | PC 14:1-22:6 | 834.5 | 15 | 225.3 | 40 | 5.46 | ES- | 1 |

|     |              |       |    |       |    |      |     |   |
|-----|--------------|-------|----|-------|----|------|-----|---|
| 129 | PC 14:1-22:6 | 834.5 | 15 | 327.2 | 40 | 5.46 | ES- | 2 |
| 130 | PC 16:0-16:0 | 792.6 | 15 | 255.3 | 40 | 5.46 | ES- | 1 |
| 131 | PC 16:0-16:1 | 790.6 | 15 | 253.3 | 40 | 5.46 | ES- | 1 |
| 132 | PC 16:0-16:1 | 790.6 | 15 | 255.3 | 40 | 5.46 | ES- | 2 |
| 133 | PC 16:0-18:0 | 820.6 | 15 | 255.3 | 40 | 5.46 | ES- | 1 |
| 134 | PC 16:0-18:0 | 820.6 | 15 | 283.3 | 40 | 5.46 | ES- | 2 |
| 135 | PC 16:0-18:1 | 818.6 | 15 | 255.3 | 40 | 5.46 | ES- | 1 |
| 136 | PC 16:0-18:1 | 818.6 | 15 | 281.3 | 40 | 5.46 | ES- | 2 |
| 137 | PC 16:0-18:2 | 816.6 | 15 | 255.3 | 40 | 5.46 | ES- | 1 |
| 138 | PC 16:0-18:2 | 816.6 | 15 | 279.3 | 40 | 5.46 | ES- | 2 |
| 139 | PC 16:0-18:3 | 814.6 | 15 | 255.3 | 40 | 5.46 | ES- | 1 |
| 140 | PC 16:0-18:3 | 814.6 | 15 | 277.3 | 40 | 5.46 | ES- | 2 |
| 141 | PC 16:0-18:4 | 812.5 | 15 | 255.3 | 40 | 5.46 | ES- | 1 |
| 142 | PC 16:0-18:4 | 812.5 | 15 | 275.3 | 40 | 5.46 | ES- | 2 |
| 143 | PE 12:0-12:0 | 578.4 | 50 | 199.3 | 25 | 6.32 | ES- | 1 |
| 144 | PE 12:0-14:0 | 606.4 | 50 | 199.3 | 25 | 6.32 | ES- | 1 |
| 145 | PE 12:0-14:0 | 606.4 | 50 | 227.3 | 25 | 6.32 | ES- | 2 |
| 146 | PE 12:0-14:1 | 604.4 | 50 | 199.3 | 25 | 6.32 | ES- | 1 |
| 147 | PE 12:0-14:1 | 604.4 | 50 | 225.3 | 25 | 6.32 | ES- | 2 |
| 148 | PE 12:0-16:0 | 634.4 | 50 | 199.3 | 25 | 6.32 | ES- | 1 |
| 149 | PE 12:0-16:0 | 634.4 | 50 | 255.3 | 25 | 6.32 | ES- | 2 |
| 150 | PE 12:0-16:1 | 632.4 | 50 | 199.3 | 25 | 6.32 | ES- | 1 |
| 151 | PE 12:0-16:1 | 632.4 | 50 | 253.3 | 25 | 6.32 | ES- | 2 |
| 152 | PE 12:0-18:0 | 662.5 | 50 | 199.3 | 25 | 6.32 | ES- | 1 |
| 153 | PE 12:0-18:0 | 662.5 | 50 | 283.3 | 25 | 6.32 | ES- | 2 |
| 154 | PE 12:0-18:1 | 660.5 | 50 | 199.3 | 25 | 6.32 | ES- | 1 |
| 155 | PE 12:0-18:1 | 660.5 | 50 | 281.3 | 25 | 6.32 | ES- | 2 |
| 156 | PE 12:0-18:2 | 658.4 | 50 | 199.3 | 25 | 6.32 | ES- | 1 |
| 157 | PE 12:0-18:2 | 658.4 | 50 | 279.3 | 25 | 6.32 | ES- | 2 |
| 158 | PE 12:0-18:3 | 656.4 | 50 | 199.3 | 25 | 6.32 | ES- | 1 |
| 159 | PE 12:0-18:3 | 656.4 | 50 | 277.3 | 25 | 6.32 | ES- | 2 |
| 160 | PE 12:0-18:4 | 654.4 | 50 | 199.3 | 25 | 6.32 | ES- | 1 |
| 161 | PE 12:0-18:4 | 654.4 | 50 | 275.3 | 25 | 6.32 | ES- | 2 |
| 162 | PE 12:0-20:0 | 690.5 | 50 | 199.3 | 25 | 6.32 | ES- | 1 |
| 163 | PE 12:0-20:0 | 690.5 | 50 | 311.2 | 25 | 6.32 | ES- | 2 |

|     |              |       |    |       |    |      |     |   |
|-----|--------------|-------|----|-------|----|------|-----|---|
| 164 | PE 12:0-20:1 | 688.5 | 50 | 199.3 | 25 | 6.32 | ES- | 1 |
| 165 | PE 12:0-20:1 | 688.5 | 50 | 309.2 | 25 | 6.32 | ES- | 2 |
| 166 | PE 12:0-20:2 | 686.5 | 50 | 199.3 | 25 | 6.32 | ES- | 1 |
| 167 | PE 12:0-20:2 | 686.5 | 50 | 307.2 | 25 | 6.32 | ES- | 2 |
| 168 | PE 12:0-20:3 | 684.5 | 50 | 199.3 | 25 | 6.32 | ES- | 1 |
| 169 | PE 12:0-20:3 | 684.5 | 50 | 305.2 | 25 | 6.32 | ES- | 2 |
| 170 | PE 12:0-20:4 | 682.4 | 50 | 199.3 | 25 | 6.32 | ES- | 1 |
| 171 | PE 12:0-20:4 | 682.4 | 50 | 303.2 | 25 | 6.32 | ES- | 2 |
| 172 | PE 12:0-20:5 | 680.4 | 50 | 199.3 | 25 | 6.32 | ES- | 1 |
| 173 | PE 12:0-20:5 | 680.4 | 50 | 301.2 | 25 | 6.32 | ES- | 2 |
| 174 | PE 12:0-22:0 | 718.5 | 50 | 199.3 | 25 | 6.32 | ES- | 1 |
| 175 | PE 12:0-22:0 | 718.5 | 50 | 339.2 | 25 | 6.32 | ES- | 2 |
| 176 | PE 12:0-22:1 | 716.5 | 50 | 199.3 | 25 | 6.32 | ES- | 1 |
| 177 | PE 12:0-22:1 | 716.5 | 50 | 337.2 | 25 | 6.32 | ES- | 2 |
| 178 | PE 12:0-22:2 | 714.5 | 50 | 199.3 | 25 | 6.32 | ES- | 1 |
| 179 | PE 12:0-22:2 | 714.5 | 50 | 335.2 | 25 | 6.32 | ES- | 2 |
| 180 | PE 12:0-22:3 | 712.5 | 50 | 199.3 | 25 | 6.32 | ES- | 1 |
| 181 | PE 12:0-22:3 | 712.5 | 50 | 333.2 | 25 | 6.32 | ES- | 2 |
| 182 | PE 12:0-22:4 | 710.5 | 50 | 199.3 | 25 | 6.32 | ES- | 1 |
| 183 | PE 12:0-22:4 | 710.5 | 50 | 331.2 | 25 | 6.32 | ES- | 2 |
| 184 | PE 12:0-22:5 | 708.5 | 50 | 199.3 | 25 | 6.32 | ES- | 1 |
| 185 | PE 12:0-22:5 | 708.5 | 50 | 329.2 | 25 | 6.32 | ES- | 2 |
| 186 | PE 12:0-22:6 | 706.4 | 50 | 199.3 | 25 | 6.32 | ES- | 1 |
| 187 | PE 12:0-22:6 | 706.4 | 50 | 327.2 | 25 | 6.32 | ES- | 2 |
| 188 | PE 14:0-14:0 | 634.4 | 50 | 227.3 | 25 | 6.32 | ES- | 1 |
| 189 | PE 14:0-14:1 | 632.4 | 50 | 225.3 | 25 | 6.32 | ES- | 1 |
| 190 | PE 14:0-14:1 | 632.4 | 50 | 227.3 | 25 | 6.32 | ES- | 2 |
| 191 | PE 14:0-16:0 | 662.5 | 50 | 227.3 | 25 | 6.32 | ES- | 1 |
| 192 | PE 14:0-16:0 | 662.5 | 50 | 255.3 | 25 | 6.32 | ES- | 2 |
| 193 | PE 14:0-16:1 | 660.5 | 50 | 227.3 | 25 | 6.32 | ES- | 1 |
| 194 | PE 14:0-16:1 | 660.5 | 50 | 253.3 | 25 | 6.32 | ES- | 2 |
| 195 | PE 14:0-18:0 | 690.5 | 50 | 227.3 | 25 | 6.32 | ES- | 1 |
| 196 | PE 14:0-18:0 | 690.5 | 50 | 283.3 | 25 | 6.32 | ES- | 2 |
| 197 | PE 14:0-18:1 | 688.5 | 50 | 227.3 | 25 | 6.32 | ES- | 1 |
| 198 | PE 14:0-18:1 | 688.5 | 50 | 281.3 | 25 | 6.32 | ES- | 2 |

|     |              |       |    |       |    |      |     |   |
|-----|--------------|-------|----|-------|----|------|-----|---|
| 199 | PE 14:0-18:2 | 686.5 | 50 | 227.3 | 25 | 6.32 | ES- | 1 |
| 200 | PE 14:0-18:2 | 686.5 | 50 | 279.3 | 25 | 6.32 | ES- | 2 |
| 201 | PE 14:0-18:3 | 684.5 | 50 | 227.3 | 25 | 6.32 | ES- | 1 |
| 202 | PE 14:0-18:3 | 684.5 | 50 | 277.3 | 25 | 6.32 | ES- | 2 |
| 203 | PE 14:0-18:4 | 682.4 | 50 | 227.3 | 25 | 6.32 | ES- | 1 |
| 204 | PE 14:0-18:4 | 682.4 | 50 | 275.3 | 25 | 6.32 | ES- | 2 |
| 205 | PE 14:0-20:0 | 718.5 | 50 | 227.3 | 25 | 6.32 | ES- | 1 |
| 206 | PE 14:0-20:0 | 718.5 | 50 | 311.2 | 25 | 6.32 | ES- | 2 |
| 207 | PE 14:0-20:1 | 716.5 | 50 | 227.3 | 25 | 6.32 | ES- | 1 |
| 208 | PE 14:0-20:1 | 716.5 | 50 | 309.2 | 25 | 6.32 | ES- | 2 |
| 209 | PE 14:0-20:2 | 714.5 | 50 | 227.3 | 25 | 6.32 | ES- | 1 |
| 210 | PE 14:0-20:2 | 714.5 | 50 | 307.2 | 25 | 6.32 | ES- | 2 |
| 211 | PE 14:0-20:3 | 712.5 | 50 | 227.3 | 25 | 6.32 | ES- | 1 |
| 212 | PE 14:0-20:3 | 712.5 | 50 | 305.2 | 25 | 6.32 | ES- | 2 |
| 213 | PE 14:0-20:4 | 710.5 | 50 | 227.3 | 25 | 6.32 | ES- | 1 |
| 214 | PE 14:0-20:4 | 710.5 | 50 | 303.2 | 25 | 6.32 | ES- | 2 |
| 215 | PE 14:0-20:5 | 708.5 | 50 | 227.3 | 25 | 6.32 | ES- | 1 |
| 216 | PE 14:0-20:5 | 708.5 | 50 | 301.2 | 25 | 6.32 | ES- | 2 |
| 217 | PE 14:0-22:0 | 746.6 | 50 | 227.3 | 25 | 6.32 | ES- | 1 |
| 218 | PE 14:0-22:0 | 746.6 | 50 | 339.2 | 25 | 6.32 | ES- | 2 |
| 219 | PE 14:0-22:1 | 744.6 | 50 | 227.3 | 25 | 6.32 | ES- | 1 |
| 220 | PE 14:0-22:1 | 744.6 | 50 | 337.2 | 25 | 6.32 | ES- | 2 |
| 221 | PE 14:0-22:2 | 742.5 | 50 | 227.3 | 25 | 6.32 | ES- | 1 |
| 222 | PE 14:0-22:2 | 742.5 | 50 | 335.2 | 25 | 6.32 | ES- | 2 |
| 223 | PE 14:0-22:3 | 740.5 | 50 | 227.3 | 25 | 6.32 | ES- | 1 |
| 224 | PE 14:0-22:3 | 740.5 | 50 | 333.2 | 25 | 6.32 | ES- | 2 |
| 225 | PE 14:0-22:4 | 738.5 | 50 | 227.3 | 25 | 6.32 | ES- | 1 |
| 226 | PE 14:0-22:4 | 738.5 | 50 | 331.2 | 25 | 6.32 | ES- | 2 |
| 227 | PE 14:0-22:5 | 736.5 | 50 | 227.3 | 25 | 6.32 | ES- | 1 |
| 228 | PE 14:0-22:5 | 736.5 | 50 | 329.2 | 25 | 6.32 | ES- | 2 |
| 229 | PE 14:0-22:6 | 734.5 | 50 | 227.3 | 25 | 6.32 | ES- | 1 |
| 230 | PE 14:0-22:6 | 734.5 | 50 | 327.2 | 25 | 6.32 | ES- | 2 |
| 231 | PE 14:1-14:1 | 630.4 | 50 | 225.3 | 25 | 6.32 | ES- | 1 |
| 232 | PE 14:1-16:0 | 660.5 | 50 | 225.3 | 25 | 6.32 | ES- | 1 |
| 233 | PE 14:1-16:0 | 660.5 | 50 | 255.3 | 25 | 6.32 | ES- | 2 |

|     |              |       |    |       |    |      |     |   |
|-----|--------------|-------|----|-------|----|------|-----|---|
| 234 | PE 14:1-16:1 | 658.4 | 50 | 225.3 | 25 | 6.32 | ES- | 1 |
| 235 | PE 14:1-16:1 | 658.4 | 50 | 253.3 | 25 | 6.32 | ES- | 2 |
| 236 | PE 14:1-18:0 | 688.5 | 50 | 225.3 | 25 | 6.32 | ES- | 1 |
| 237 | PE 14:1-18:0 | 688.5 | 50 | 283.3 | 25 | 6.32 | ES- | 2 |
| 238 | PE 14:1-18:1 | 686.5 | 50 | 225.3 | 25 | 6.32 | ES- | 1 |
| 239 | PE 14:1-18:1 | 686.5 | 50 | 281.3 | 25 | 6.32 | ES- | 2 |
| 240 | PE 14:1-18:2 | 684.5 | 50 | 225.3 | 25 | 6.32 | ES- | 1 |
| 241 | PE 14:1-18:2 | 684.5 | 50 | 279.3 | 25 | 6.32 | ES- | 2 |
| 242 | PE 14:1-18:3 | 682.4 | 50 | 225.3 | 25 | 6.32 | ES- | 1 |
| 243 | PE 14:1-18:3 | 682.4 | 50 | 277.3 | 25 | 6.32 | ES- | 2 |
| 244 | PE 14:1-18:4 | 680.4 | 50 | 225.3 | 25 | 6.32 | ES- | 1 |
| 245 | PE 14:1-18:4 | 680.4 | 50 | 275.3 | 25 | 6.32 | ES- | 2 |
| 246 | PE 14:1-20:0 | 716.5 | 50 | 225.3 | 25 | 6.32 | ES- | 1 |
| 247 | PE 14:1-20:0 | 716.5 | 50 | 311.2 | 25 | 6.32 | ES- | 2 |
| 248 | PE 14:1-20:1 | 714.5 | 50 | 225.3 | 25 | 6.32 | ES- | 1 |
| 249 | PE 14:1-20:1 | 714.5 | 50 | 309.2 | 25 | 6.32 | ES- | 2 |
| 250 | PE 14:1-20:2 | 712.5 | 50 | 225.3 | 25 | 6.32 | ES- | 1 |
| 251 | PE 14:1-20:2 | 712.5 | 50 | 307.2 | 25 | 6.32 | ES- | 2 |
| 252 | PE 14:1-20:3 | 710.5 | 50 | 225.3 | 25 | 6.32 | ES- | 1 |
| 253 | PE 14:1-20:3 | 710.5 | 50 | 305.2 | 25 | 6.32 | ES- | 2 |
| 254 | PE 14:1-20:4 | 708.5 | 50 | 225.3 | 25 | 6.32 | ES- | 1 |
| 255 | PE 14:1-20:4 | 708.5 | 50 | 303.2 | 25 | 6.32 | ES- | 2 |
| 256 | PE 14:1-20:5 | 706.4 | 50 | 225.3 | 25 | 6.32 | ES- | 1 |
| 257 | PE 14:1-20:5 | 706.4 | 50 | 301.2 | 25 | 6.32 | ES- | 2 |
| 258 | PE 14:1-22:0 | 744.6 | 50 | 225.3 | 25 | 6.32 | ES- | 1 |
| 259 | PE 14:1-22:0 | 744.6 | 50 | 339.2 | 25 | 6.32 | ES- | 2 |
| 260 | PE 14:1-22:1 | 742.5 | 50 | 225.3 | 25 | 6.32 | ES- | 1 |
| 261 | PE 14:1-22:1 | 742.5 | 50 | 337.2 | 25 | 6.32 | ES- | 2 |
| 262 | PE 14:1-22:2 | 740.5 | 50 | 225.3 | 25 | 6.32 | ES- | 1 |
| 263 | PE 14:1-22:2 | 740.5 | 50 | 335.2 | 25 | 6.32 | ES- | 2 |
| 264 | PE 14:1-22:3 | 738.5 | 50 | 225.3 | 25 | 6.32 | ES- | 1 |
| 265 | PE 14:1-22:3 | 738.5 | 50 | 333.2 | 25 | 6.32 | ES- | 2 |
| 266 | PE 14:1-22:4 | 736.5 | 50 | 225.3 | 25 | 6.32 | ES- | 1 |
| 267 | PE 14:1-22:4 | 736.5 | 50 | 331.2 | 25 | 6.32 | ES- | 2 |
| 268 | PE 14:1-22:5 | 734.5 | 50 | 225.3 | 25 | 6.32 | ES- | 1 |

|     |              |       |    |       |    |      |     |   |
|-----|--------------|-------|----|-------|----|------|-----|---|
| 269 | PE 14:1-22:5 | 734.5 | 50 | 329.2 | 25 | 6.32 | ES- | 2 |
| 270 | PE 14:1-22:6 | 732.5 | 50 | 225.3 | 25 | 6.32 | ES- | 1 |
| 271 | PE 14:1-22:6 | 732.5 | 50 | 327.2 | 25 | 6.32 | ES- | 2 |
| 272 | PE 16:0-16:0 | 690.5 | 50 | 255.3 | 25 | 6.32 | ES- | 1 |
| 273 | PE 16:0-16:1 | 688.5 | 50 | 253.3 | 25 | 6.32 | ES- | 1 |
| 274 | PE 16:0-16:1 | 688.5 | 50 | 255.3 | 25 | 6.32 | ES- | 2 |
| 275 | PE 16:0-18:0 | 718.5 | 50 | 255.3 | 25 | 6.32 | ES- | 1 |
| 276 | PE 16:0-18:0 | 718.5 | 50 | 283.3 | 25 | 6.32 | ES- | 2 |
| 277 | PE 16:0-18:1 | 716.5 | 50 | 255.3 | 25 | 6.32 | ES- | 1 |
| 278 | PE 16:0-18:1 | 716.5 | 50 | 281.3 | 25 | 6.32 | ES- | 2 |
| 279 | PE 16:0-18:2 | 714.5 | 50 | 255.3 | 25 | 6.32 | ES- | 1 |
| 280 | PE 16:0-18:2 | 714.5 | 50 | 279.3 | 25 | 6.32 | ES- | 2 |
| 281 | PE 16:0-18:3 | 712.5 | 50 | 255.3 | 25 | 6.32 | ES- | 1 |
| 282 | PE 16:0-18:3 | 712.5 | 50 | 277.3 | 25 | 6.32 | ES- | 2 |
| 283 | PE 16:0-18:4 | 710.5 | 50 | 255.3 | 25 | 6.32 | ES- | 1 |
| 284 | PE 16:0-18:4 | 710.5 | 50 | 275.3 | 25 | 6.32 | ES- | 2 |
| 285 | PG 12:0-12:0 | 609.4 | 30 | 199.3 | 40 | 8.99 | ES- | 1 |
| 286 | PG 12:0-14:0 | 637.4 | 30 | 199.3 | 40 | 8.99 | ES- | 1 |
| 287 | PG 12:0-14:0 | 637.4 | 30 | 227.3 | 40 | 8.99 | ES- | 2 |
| 288 | PG 12:0-14:1 | 635.4 | 30 | 199.3 | 40 | 8.99 | ES- | 1 |
| 289 | PG 12:0-14:1 | 635.4 | 30 | 225.3 | 40 | 8.99 | ES- | 2 |
| 290 | PG 12:0-16:0 | 665.4 | 30 | 199.3 | 40 | 8.99 | ES- | 1 |
| 291 | PG 12:0-16:0 | 665.4 | 30 | 255.3 | 40 | 8.99 | ES- | 2 |
| 292 | PG 12:0-16:1 | 663.4 | 30 | 199.3 | 40 | 8.99 | ES- | 1 |
| 293 | PG 12:0-16:1 | 663.4 | 30 | 253.3 | 40 | 8.99 | ES- | 2 |
| 294 | PG 12:0-18:0 | 693.5 | 30 | 199.3 | 40 | 8.99 | ES- | 1 |
| 295 | PG 12:0-18:0 | 693.5 | 30 | 283.3 | 40 | 8.99 | ES- | 2 |
| 296 | PG 12:0-18:1 | 691.5 | 30 | 199.3 | 40 | 8.99 | ES- | 1 |
| 297 | PG 12:0-18:1 | 691.5 | 30 | 281.3 | 40 | 8.99 | ES- | 2 |
| 298 | PG 12:0-18:2 | 689.4 | 30 | 199.3 | 40 | 8.99 | ES- | 1 |
| 299 | PG 12:0-18:2 | 689.4 | 30 | 279.3 | 40 | 8.99 | ES- | 2 |
| 300 | PG 12:0-18:3 | 687.4 | 30 | 199.3 | 40 | 8.99 | ES- | 1 |
| 301 | PG 12:0-18:3 | 687.4 | 30 | 277.3 | 40 | 8.99 | ES- | 2 |
| 302 | PG 12:0-18:4 | 685.4 | 30 | 199.3 | 40 | 8.99 | ES- | 1 |
| 303 | PG 12:0-18:4 | 685.4 | 30 | 275.3 | 40 | 8.99 | ES- | 2 |

|     |              |       |    |       |    |      |     |   |
|-----|--------------|-------|----|-------|----|------|-----|---|
| 304 | PG 12:0-20:0 | 721.5 | 30 | 199.3 | 40 | 8.99 | ES- | 1 |
| 305 | PG 12:0-20:0 | 721.5 | 30 | 311.2 | 40 | 8.99 | ES- | 2 |
| 306 | PG 12:0-20:1 | 719.5 | 30 | 199.3 | 40 | 8.99 | ES- | 1 |
| 307 | PG 12:0-20:1 | 719.5 | 30 | 309.2 | 40 | 8.99 | ES- | 2 |
| 308 | PG 12:0-20:2 | 717.5 | 30 | 199.3 | 40 | 8.99 | ES- | 1 |
| 309 | PG 12:0-20:2 | 717.5 | 30 | 307.2 | 40 | 8.99 | ES- | 2 |
| 310 | PG 12:0-20:3 | 715.5 | 30 | 199.3 | 40 | 8.99 | ES- | 1 |
| 311 | PG 12:0-20:3 | 715.5 | 30 | 305.2 | 40 | 8.99 | ES- | 2 |
| 312 | PG 12:0-20:4 | 713.4 | 30 | 199.3 | 40 | 8.99 | ES- | 1 |
| 313 | PG 12:0-20:4 | 713.4 | 30 | 303.2 | 40 | 8.99 | ES- | 2 |
| 314 | PG 12:0-20:5 | 711.4 | 30 | 199.3 | 40 | 8.99 | ES- | 1 |
| 315 | PG 12:0-20:5 | 711.4 | 30 | 301.2 | 40 | 8.99 | ES- | 2 |
| 316 | PG 12:0-22:0 | 749.5 | 30 | 199.3 | 40 | 8.99 | ES- | 1 |
| 317 | PG 12:0-22:0 | 749.5 | 30 | 339.2 | 40 | 8.99 | ES- | 2 |
| 318 | PG 12:0-22:1 | 747.5 | 30 | 199.3 | 40 | 8.99 | ES- | 1 |
| 319 | PG 12:0-22:1 | 747.5 | 30 | 337.2 | 40 | 8.99 | ES- | 2 |
| 320 | PG 12:0-22:2 | 745.5 | 30 | 199.3 | 40 | 8.99 | ES- | 1 |
| 321 | PG 12:0-22:2 | 745.5 | 30 | 335.2 | 40 | 8.99 | ES- | 2 |
| 322 | PG 12:0-22:3 | 743.5 | 30 | 199.3 | 40 | 8.99 | ES- | 1 |
| 323 | PG 12:0-22:3 | 743.5 | 30 | 333.2 | 40 | 8.99 | ES- | 2 |
| 324 | PG 12:0-22:4 | 741.5 | 30 | 199.3 | 40 | 8.99 | ES- | 1 |
| 325 | PG 12:0-22:4 | 741.5 | 30 | 331.2 | 40 | 8.99 | ES- | 2 |
| 326 | PG 12:0-22:5 | 739.5 | 30 | 199.3 | 40 | 8.99 | ES- | 1 |
| 327 | PG 12:0-22:5 | 739.5 | 30 | 329.2 | 40 | 8.99 | ES- | 2 |
| 328 | PG 12:0-22:6 | 737.4 | 30 | 199.3 | 40 | 8.99 | ES- | 1 |
| 329 | PG 12:0-22:6 | 737.4 | 30 | 327.2 | 40 | 8.99 | ES- | 2 |
| 330 | PG 14:0-14:0 | 665.4 | 30 | 227.3 | 40 | 8.99 | ES- | 1 |
| 331 | PG 14:0-14:1 | 663.4 | 30 | 225.3 | 40 | 8.99 | ES- | 1 |
| 332 | PG 14:0-14:1 | 663.4 | 30 | 227.3 | 40 | 8.99 | ES- | 2 |
| 333 | PG 14:0-16:0 | 693.5 | 30 | 227.3 | 40 | 8.99 | ES- | 1 |
| 334 | PG 14:0-16:0 | 693.5 | 30 | 255.3 | 40 | 8.99 | ES- | 2 |
| 335 | PG 14:0-16:1 | 691.5 | 30 | 227.3 | 40 | 8.99 | ES- | 1 |
| 336 | PG 14:0-16:1 | 691.5 | 30 | 253.3 | 40 | 8.99 | ES- | 2 |
| 337 | PG 14:0-18:0 | 721.5 | 30 | 227.3 | 40 | 8.99 | ES- | 1 |
| 338 | PG 14:0-18:0 | 721.5 | 30 | 283.3 | 40 | 8.99 | ES- | 2 |

|     |              |       |    |       |    |      |     |   |
|-----|--------------|-------|----|-------|----|------|-----|---|
| 339 | PG 14:0-18:1 | 719.5 | 30 | 227.3 | 40 | 8.99 | ES- | 1 |
| 340 | PG 14:0-18:1 | 719.5 | 30 | 281.3 | 40 | 8.99 | ES- | 2 |
| 341 | PG 14:0-18:2 | 717.5 | 30 | 227.3 | 40 | 8.99 | ES- | 1 |
| 342 | PG 14:0-18:2 | 717.5 | 30 | 279.3 | 40 | 8.99 | ES- | 2 |
| 343 | PG 14:0-18:3 | 715.5 | 30 | 227.3 | 40 | 8.99 | ES- | 1 |
| 344 | PG 14:0-18:3 | 715.5 | 30 | 277.3 | 40 | 8.99 | ES- | 2 |
| 345 | PG 14:0-18:4 | 713.4 | 30 | 227.3 | 40 | 8.99 | ES- | 1 |
| 346 | PG 14:0-18:4 | 713.4 | 30 | 275.3 | 40 | 8.99 | ES- | 2 |
| 347 | PG 14:0-20:0 | 749.5 | 30 | 227.3 | 40 | 8.99 | ES- | 1 |
| 348 | PG 14:0-20:0 | 749.5 | 30 | 311.2 | 40 | 8.99 | ES- | 2 |
| 349 | PG 14:0-20:1 | 747.5 | 30 | 227.3 | 40 | 8.99 | ES- | 1 |
| 350 | PG 14:0-20:1 | 747.5 | 30 | 309.2 | 40 | 8.99 | ES- | 2 |
| 351 | PG 14:0-20:2 | 745.5 | 30 | 227.3 | 40 | 8.99 | ES- | 1 |
| 352 | PG 14:0-20:2 | 745.5 | 30 | 307.2 | 40 | 8.99 | ES- | 2 |
| 353 | PG 14:0-20:3 | 743.5 | 30 | 227.3 | 40 | 8.99 | ES- | 1 |
| 354 | PG 14:0-20:3 | 743.5 | 30 | 305.2 | 40 | 8.99 | ES- | 2 |
| 355 | PG 14:0-20:4 | 741.5 | 30 | 227.3 | 40 | 8.99 | ES- | 1 |
| 356 | PG 14:0-20:4 | 741.5 | 30 | 303.2 | 40 | 8.99 | ES- | 2 |
| 357 | PG 14:0-20:5 | 739.5 | 30 | 227.3 | 40 | 8.99 | ES- | 1 |
| 358 | PG 14:0-20:5 | 739.5 | 30 | 301.2 | 40 | 8.99 | ES- | 2 |
| 359 | PG 14:0-22:0 | 777.6 | 30 | 227.3 | 40 | 8.99 | ES- | 1 |
| 360 | PG 14:0-22:0 | 777.6 | 30 | 339.2 | 40 | 8.99 | ES- | 2 |
| 361 | PG 14:0-22:1 | 775.5 | 30 | 227.3 | 40 | 8.99 | ES- | 1 |
| 362 | PG 14:0-22:1 | 775.5 | 30 | 337.2 | 40 | 8.99 | ES- | 2 |
| 363 | PG 14:0-22:2 | 773.5 | 30 | 227.3 | 40 | 8.99 | ES- | 1 |
| 364 | PG 14:0-22:2 | 773.5 | 30 | 335.2 | 40 | 8.99 | ES- | 2 |
| 365 | PG 14:0-22:3 | 771.5 | 30 | 227.3 | 40 | 8.99 | ES- | 1 |
| 366 | PG 14:0-22:3 | 771.5 | 30 | 333.2 | 40 | 8.99 | ES- | 2 |
| 367 | PG 14:0-22:4 | 769.5 | 30 | 227.3 | 40 | 8.99 | ES- | 1 |
| 368 | PG 14:0-22:4 | 769.5 | 30 | 331.2 | 40 | 8.99 | ES- | 2 |
| 369 | PG 14:0-22:5 | 767.5 | 30 | 227.3 | 40 | 8.99 | ES- | 1 |
| 370 | PG 14:0-22:5 | 767.5 | 30 | 329.2 | 40 | 8.99 | ES- | 2 |
| 371 | PG 14:0-22:6 | 765.5 | 30 | 227.3 | 40 | 8.99 | ES- | 1 |
| 372 | PG 14:0-22:6 | 765.5 | 30 | 327.2 | 40 | 8.99 | ES- | 2 |
| 373 | PG 14:1-14:1 | 661.4 | 30 | 225.3 | 40 | 8.99 | ES- | 1 |



|     |              |       |    |       |    |      |     |   |
|-----|--------------|-------|----|-------|----|------|-----|---|
| 374 | PG 14:1-16:0 | 691.5 | 30 | 225.3 | 40 | 8.99 | ES- | 1 |
| 375 | PG 14:1-16:0 | 691.5 | 30 | 255.3 | 40 | 8.99 | ES- | 2 |
| 376 | PG 14:1-16:1 | 689.4 | 30 | 225.3 | 40 | 8.99 | ES- | 1 |
| 377 | PG 14:1-16:1 | 689.4 | 30 | 253.3 | 40 | 8.99 | ES- | 2 |
| 378 | PG 14:1-18:0 | 719.5 | 30 | 225.3 | 40 | 8.99 | ES- | 1 |
| 379 | PG 14:1-18:0 | 719.5 | 30 | 283.3 | 40 | 8.99 | ES- | 2 |
| 380 | PG 14:1-18:1 | 717.5 | 30 | 225.3 | 40 | 8.99 | ES- | 1 |
| 381 | PG 14:1-18:1 | 717.5 | 30 | 281.3 | 40 | 8.99 | ES- | 2 |
| 382 | PG 14:1-18:2 | 715.5 | 30 | 225.3 | 40 | 8.99 | ES- | 1 |
| 383 | PG 14:1-18:2 | 715.5 | 30 | 279.3 | 40 | 8.99 | ES- | 2 |
| 384 | PG 14:1-18:3 | 713.4 | 30 | 225.3 | 40 | 8.99 | ES- | 1 |
| 385 | PG 14:1-18:3 | 713.4 | 30 | 277.3 | 40 | 8.99 | ES- | 2 |
| 386 | PG 14:1-18:4 | 711.4 | 30 | 225.3 | 40 | 8.99 | ES- | 1 |
| 387 | PG 14:1-18:4 | 711.4 | 30 | 275.3 | 40 | 8.99 | ES- | 2 |
| 388 | PG 14:1-20:0 | 747.5 | 30 | 225.3 | 40 | 8.99 | ES- | 1 |
| 389 | PG 14:1-20:0 | 747.5 | 30 | 311.2 | 40 | 8.99 | ES- | 2 |
| 390 | PG 14:1-20:1 | 745.5 | 30 | 225.3 | 40 | 8.99 | ES- | 1 |
| 391 | PG 14:1-20:1 | 745.5 | 30 | 309.2 | 40 | 8.99 | ES- | 2 |
| 392 | PG 14:1-20:2 | 743.5 | 30 | 225.3 | 40 | 8.99 | ES- | 1 |
| 393 | PG 14:1-20:2 | 743.5 | 30 | 307.2 | 40 | 8.99 | ES- | 2 |
| 394 | PG 14:1-20:3 | 741.5 | 30 | 225.3 | 40 | 8.99 | ES- | 1 |
| 395 | PG 14:1-20:3 | 741.5 | 30 | 305.2 | 40 | 8.99 | ES- | 2 |
| 396 | PG 14:1-20:4 | 739.5 | 30 | 225.3 | 40 | 8.99 | ES- | 1 |
| 397 | PG 14:1-20:4 | 739.5 | 30 | 303.2 | 40 | 8.99 | ES- | 2 |
| 398 | PG 14:1-20:5 | 737.4 | 30 | 225.3 | 40 | 8.99 | ES- | 1 |
| 399 | PG 14:1-20:5 | 737.4 | 30 | 301.2 | 40 | 8.99 | ES- | 2 |
| 400 | PG 14:1-22:0 | 775.5 | 30 | 225.3 | 40 | 8.99 | ES- | 1 |
| 401 | PG 14:1-22:0 | 775.5 | 30 | 339.2 | 40 | 8.99 | ES- | 2 |
| 402 | PG 14:1-22:1 | 773.5 | 30 | 225.3 | 40 | 8.99 | ES- | 1 |
| 403 | PG 14:1-22:1 | 773.5 | 30 | 337.2 | 40 | 8.99 | ES- | 2 |
| 404 | PG 14:1-22:2 | 771.5 | 30 | 225.3 | 40 | 8.99 | ES- | 1 |
| 405 | PG 14:1-22:2 | 771.5 | 30 | 335.2 | 40 | 8.99 | ES- | 2 |
| 406 | PG 14:1-22:3 | 769.5 | 30 | 225.3 | 40 | 8.99 | ES- | 1 |
| 407 | PG 14:1-22:3 | 769.5 | 30 | 333.2 | 40 | 8.99 | ES- | 2 |
| 408 | PG 14:1-22:4 | 767.5 | 30 | 225.3 | 40 | 8.99 | ES- | 1 |

|     |              |       |    |       |    |       |     |   |
|-----|--------------|-------|----|-------|----|-------|-----|---|
| 409 | PG 14:1-22:4 | 767.5 | 30 | 331.2 | 40 | 8.99  | ES- | 2 |
| 410 | PG 14:1-22:5 | 765.5 | 30 | 225.3 | 40 | 8.99  | ES- | 1 |
| 411 | PG 14:1-22:5 | 765.5 | 30 | 329.2 | 40 | 8.99  | ES- | 2 |
| 412 | PG 14:1-22:6 | 763.5 | 30 | 225.3 | 40 | 8.99  | ES- | 1 |
| 413 | PG 14:1-22:6 | 763.5 | 30 | 327.2 | 40 | 8.99  | ES- | 2 |
| 414 | PG 16:0-16:0 | 721.5 | 30 | 255.3 | 40 | 8.99  | ES- | 1 |
| 415 | PG 16:0-16:1 | 719.5 | 30 | 253.3 | 40 | 8.99  | ES- | 1 |
| 416 | PG 16:0-16:1 | 719.5 | 30 | 255.3 | 40 | 8.99  | ES- | 2 |
| 417 | PG 16:0-18:0 | 749.5 | 30 | 255.3 | 40 | 8.99  | ES- | 1 |
| 418 | PG 16:0-18:0 | 749.5 | 30 | 283.3 | 40 | 8.99  | ES- | 2 |
| 419 | PG 16:0-18:1 | 747.5 | 30 | 255.3 | 40 | 8.99  | ES- | 1 |
| 420 | PG 16:0-18:1 | 747.5 | 30 | 281.3 | 40 | 8.99  | ES- | 2 |
| 421 | PG 16:0-18:2 | 745.5 | 30 | 255.3 | 40 | 8.99  | ES- | 1 |
| 422 | PG 16:0-18:2 | 745.5 | 30 | 279.3 | 40 | 8.99  | ES- | 2 |
| 423 | PG 16:0-18:3 | 743.5 | 30 | 255.3 | 40 | 8.99  | ES- | 1 |
| 424 | PG 16:0-18:3 | 743.5 | 30 | 277.3 | 40 | 8.99  | ES- | 2 |
| 425 | PG 16:0-18:4 | 741.5 | 30 | 255.3 | 40 | 8.99  | ES- | 1 |
| 426 | PG 16:0-18:4 | 741.5 | 30 | 275.3 | 40 | 8.99  | ES- | 2 |
| 427 | PS 12:0-12:0 | 622.4 | 30 | 199.3 | 50 | 12.23 | ES- | 1 |
| 428 | PS 12:0-14:0 | 650.4 | 30 | 199.3 | 50 | 12.23 | ES- | 1 |
| 429 | PS 12:0-14:0 | 650.4 | 30 | 227.3 | 50 | 12.23 | ES- | 2 |
| 430 | PS 12:0-14:1 | 648.4 | 30 | 199.3 | 50 | 12.23 | ES- | 1 |
| 431 | PS 12:0-14:1 | 648.4 | 30 | 225.3 | 50 | 12.23 | ES- | 2 |
| 432 | PS 12:0-16:0 | 678.4 | 30 | 199.3 | 50 | 12.23 | ES- | 1 |
| 433 | PS 12:0-16:0 | 678.4 | 30 | 255.3 | 50 | 12.23 | ES- | 2 |
| 434 | PS 12:0-16:1 | 676.4 | 30 | 199.3 | 50 | 12.23 | ES- | 1 |
| 435 | PS 12:0-16:1 | 676.4 | 30 | 253.3 | 50 | 12.23 | ES- | 2 |
| 436 | PS 12:0-18:0 | 706.5 | 30 | 199.3 | 50 | 12.23 | ES- | 1 |
| 437 | PS 12:0-18:0 | 706.5 | 30 | 283.3 | 50 | 12.23 | ES- | 2 |
| 438 | PS 12:0-18:1 | 704.5 | 30 | 199.3 | 50 | 12.23 | ES- | 1 |
| 439 | PS 12:0-18:1 | 704.5 | 30 | 281.3 | 50 | 12.23 | ES- | 2 |
| 440 | PS 12:0-18:2 | 702.4 | 30 | 199.3 | 50 | 12.23 | ES- | 1 |
| 441 | PS 12:0-18:2 | 702.4 | 30 | 279.3 | 50 | 12.23 | ES- | 2 |
| 442 | PS 12:0-18:3 | 700.4 | 30 | 199.3 | 50 | 12.23 | ES- | 1 |
| 443 | PS 12:0-18:3 | 700.4 | 30 | 277.3 | 50 | 12.23 | ES- | 2 |

|     |              |       |    |       |    |       |     |   |
|-----|--------------|-------|----|-------|----|-------|-----|---|
| 444 | PS 12:0-18:4 | 698.4 | 30 | 199.3 | 50 | 12.23 | ES- | 1 |
| 445 | PS 12:0-18:4 | 698.4 | 30 | 275.3 | 50 | 12.23 | ES- | 2 |
| 446 | PS 12:0-20:0 | 734.5 | 30 | 199.3 | 50 | 12.23 | ES- | 1 |
| 447 | PS 12:0-20:0 | 734.5 | 30 | 311.2 | 50 | 12.23 | ES- | 2 |
| 448 | PS 12:0-20:1 | 732.5 | 30 | 199.3 | 50 | 12.23 | ES- | 1 |
| 449 | PS 12:0-20:1 | 732.5 | 30 | 309.2 | 50 | 12.23 | ES- | 2 |
| 450 | PS 12:0-20:2 | 730.5 | 30 | 199.3 | 50 | 12.23 | ES- | 1 |
| 451 | PS 12:0-20:2 | 730.5 | 30 | 307.2 | 50 | 12.23 | ES- | 2 |
| 452 | PS 12:0-20:3 | 728.5 | 30 | 199.3 | 50 | 12.23 | ES- | 1 |
| 453 | PS 12:0-20:3 | 728.5 | 30 | 305.2 | 50 | 12.23 | ES- | 2 |
| 454 | PS 12:0-20:4 | 726.4 | 30 | 199.3 | 50 | 12.23 | ES- | 1 |
| 455 | PS 12:0-20:4 | 726.4 | 30 | 303.2 | 50 | 12.23 | ES- | 2 |
| 456 | PS 12:0-20:5 | 724.4 | 30 | 199.3 | 50 | 12.23 | ES- | 1 |
| 457 | PS 12:0-20:5 | 724.4 | 30 | 301.2 | 50 | 12.23 | ES- | 2 |
| 458 | PS 12:0-22:0 | 762.5 | 30 | 199.3 | 50 | 12.23 | ES- | 1 |
| 459 | PS 12:0-22:0 | 762.5 | 30 | 339.2 | 50 | 12.23 | ES- | 2 |
| 460 | PS 12:0-22:1 | 760.5 | 30 | 199.3 | 50 | 12.23 | ES- | 1 |
| 461 | PS 12:0-22:1 | 760.5 | 30 | 337.2 | 50 | 12.23 | ES- | 2 |
| 462 | PS 12:0-22:2 | 758.5 | 30 | 199.3 | 50 | 12.23 | ES- | 1 |
| 463 | PS 12:0-22:2 | 758.5 | 30 | 335.2 | 50 | 12.23 | ES- | 2 |
| 464 | PS 12:0-22:3 | 756.5 | 30 | 199.3 | 50 | 12.23 | ES- | 1 |
| 465 | PS 12:0-22:3 | 756.5 | 30 | 333.2 | 50 | 12.23 | ES- | 2 |
| 466 | PS 12:0-22:4 | 754.5 | 30 | 199.3 | 50 | 12.23 | ES- | 1 |
| 467 | PS 12:0-22:4 | 754.5 | 30 | 331.2 | 50 | 12.23 | ES- | 2 |
| 468 | PS 12:0-22:5 | 752.5 | 30 | 199.3 | 50 | 12.23 | ES- | 1 |
| 469 | PS 12:0-22:5 | 752.5 | 30 | 329.2 | 50 | 12.23 | ES- | 2 |
| 470 | PS 12:0-22:6 | 750.4 | 30 | 199.3 | 50 | 12.23 | ES- | 1 |
| 471 | PS 12:0-22:6 | 750.4 | 30 | 327.2 | 50 | 12.23 | ES- | 2 |
| 472 | PS 14:0-14:0 | 678.4 | 30 | 227.3 | 50 | 12.23 | ES- | 1 |
| 473 | PS 14:0-14:1 | 676.4 | 30 | 225.3 | 50 | 12.23 | ES- | 1 |
| 474 | PS 14:0-14:1 | 676.4 | 30 | 227.3 | 50 | 12.23 | ES- | 2 |
| 475 | PS 14:0-16:0 | 706.5 | 30 | 227.3 | 50 | 12.23 | ES- | 1 |
| 476 | PS 14:0-16:0 | 706.5 | 30 | 255.3 | 50 | 12.23 | ES- | 2 |
| 477 | PS 14:0-16:1 | 704.5 | 30 | 227.3 | 50 | 12.23 | ES- | 1 |
| 478 | PS 14:0-16:1 | 704.5 | 30 | 253.3 | 50 | 12.23 | ES- | 2 |

|     |              |       |    |       |    |       |     |   |
|-----|--------------|-------|----|-------|----|-------|-----|---|
| 479 | PS 14:0-18:0 | 734.5 | 30 | 227.3 | 50 | 12.23 | ES- | 1 |
| 480 | PS 14:0-18:0 | 734.5 | 30 | 283.3 | 50 | 12.23 | ES- | 2 |
| 481 | PS 14:0-18:1 | 732.5 | 30 | 227.3 | 50 | 12.23 | ES- | 1 |
| 482 | PS 14:0-18:1 | 732.5 | 30 | 281.3 | 50 | 12.23 | ES- | 2 |
| 483 | PS 14:0-18:2 | 730.5 | 30 | 227.3 | 50 | 12.23 | ES- | 1 |
| 484 | PS 14:0-18:2 | 730.5 | 30 | 279.3 | 50 | 12.23 | ES- | 2 |
| 485 | PS 14:0-18:3 | 728.5 | 30 | 227.3 | 50 | 12.23 | ES- | 1 |
| 486 | PS 14:0-18:3 | 728.5 | 30 | 277.3 | 50 | 12.23 | ES- | 2 |
| 487 | PS 14:0-18:4 | 726.4 | 30 | 227.3 | 50 | 12.23 | ES- | 1 |
| 488 | PS 14:0-18:4 | 726.4 | 30 | 275.3 | 50 | 12.23 | ES- | 2 |
| 489 | PS 14:0-20:0 | 762.5 | 30 | 227.3 | 50 | 12.23 | ES- | 1 |
| 490 | PS 14:0-20:0 | 762.5 | 30 | 311.2 | 50 | 12.23 | ES- | 2 |
| 491 | PS 14:0-20:1 | 760.5 | 30 | 227.3 | 50 | 12.23 | ES- | 1 |
| 492 | PS 14:0-20:1 | 760.5 | 30 | 309.2 | 50 | 12.23 | ES- | 2 |
| 493 | PS 14:0-20:2 | 758.5 | 30 | 227.3 | 50 | 12.23 | ES- | 1 |
| 494 | PS 14:0-20:2 | 758.5 | 30 | 307.2 | 50 | 12.23 | ES- | 2 |
| 495 | PS 14:0-20:3 | 756.5 | 30 | 227.3 | 50 | 12.23 | ES- | 1 |
| 496 | PS 14:0-20:3 | 756.5 | 30 | 305.2 | 50 | 12.23 | ES- | 2 |
| 497 | PS 14:0-20:4 | 754.5 | 30 | 227.3 | 50 | 12.23 | ES- | 1 |
| 498 | PS 14:0-20:4 | 754.5 | 30 | 303.2 | 50 | 12.23 | ES- | 2 |
| 499 | PS 14:0-20:5 | 752.5 | 30 | 227.3 | 50 | 12.23 | ES- | 1 |
| 500 | PS 14:0-20:5 | 752.5 | 30 | 301.2 | 50 | 12.23 | ES- | 2 |
| 501 | PS 14:0-22:0 | 790.6 | 30 | 227.3 | 50 | 12.23 | ES- | 1 |
| 502 | PS 14:0-22:0 | 790.6 | 30 | 339.2 | 50 | 12.23 | ES- | 2 |
| 503 | PS 14:0-22:1 | 788.5 | 30 | 227.3 | 50 | 12.23 | ES- | 1 |
| 504 | PS 14:0-22:1 | 788.5 | 30 | 337.2 | 50 | 12.23 | ES- | 2 |
| 505 | PS 14:0-22:2 | 786.5 | 30 | 227.3 | 50 | 12.23 | ES- | 1 |
| 506 | PS 14:0-22:2 | 786.5 | 30 | 335.2 | 50 | 12.23 | ES- | 2 |
| 507 | PS 14:0-22:3 | 784.5 | 30 | 227.3 | 50 | 12.23 | ES- | 1 |
| 508 | PS 14:0-22:3 | 784.5 | 30 | 333.2 | 50 | 12.23 | ES- | 2 |
| 509 | PS 14:0-22:4 | 782.5 | 30 | 227.3 | 50 | 12.23 | ES- | 1 |
| 510 | PS 14:0-22:4 | 782.5 | 30 | 331.2 | 50 | 12.23 | ES- | 2 |
| 511 | PS 14:0-22:5 | 780.5 | 30 | 227.3 | 50 | 12.23 | ES- | 1 |
| 512 | PS 14:0-22:5 | 780.5 | 30 | 329.2 | 50 | 12.23 | ES- | 2 |
| 513 | PS 14:0-22:6 | 778.5 | 30 | 227.3 | 50 | 12.23 | ES- | 1 |

|     |              |       |    |       |    |       |     |   |
|-----|--------------|-------|----|-------|----|-------|-----|---|
| 514 | PS 14:0-22:6 | 778.5 | 30 | 327.2 | 50 | 12.23 | ES- | 2 |
| 515 | PS 14:1-14:1 | 674.4 | 30 | 225.3 | 50 | 12.23 | ES- | 1 |
| 516 | PS 14:1-16:0 | 704.5 | 30 | 225.3 | 50 | 12.23 | ES- | 1 |
| 517 | PS 14:1-16:0 | 704.5 | 30 | 255.3 | 50 | 12.23 | ES- | 2 |
| 518 | PS 14:1-16:1 | 702.4 | 30 | 225.3 | 50 | 12.23 | ES- | 1 |
| 519 | PS 14:1-16:1 | 702.4 | 30 | 253.3 | 50 | 12.23 | ES- | 2 |
| 520 | PS 14:1-18:0 | 732.5 | 30 | 225.3 | 50 | 12.23 | ES- | 1 |
| 521 | PS 14:1-18:0 | 732.5 | 30 | 283.3 | 50 | 12.23 | ES- | 2 |
| 522 | PS 14:1-18:1 | 730.5 | 30 | 225.3 | 50 | 12.23 | ES- | 1 |
| 523 | PS 14:1-18:1 | 730.5 | 30 | 281.3 | 50 | 12.23 | ES- | 2 |
| 524 | PS 14:1-18:2 | 728.5 | 30 | 225.3 | 50 | 12.23 | ES- | 1 |
| 525 | PS 14:1-18:2 | 728.5 | 30 | 279.3 | 50 | 12.23 | ES- | 2 |
| 526 | PS 14:1-18:3 | 726.4 | 30 | 225.3 | 50 | 12.23 | ES- | 1 |
| 527 | PS 14:1-18:3 | 726.4 | 30 | 277.3 | 50 | 12.23 | ES- | 2 |
| 528 | PS 14:1-18:4 | 724.4 | 30 | 225.3 | 50 | 12.23 | ES- | 1 |
| 529 | PS 14:1-18:4 | 724.4 | 30 | 275.3 | 50 | 12.23 | ES- | 2 |
| 530 | PS 14:1-20:0 | 760.5 | 30 | 225.3 | 50 | 12.23 | ES- | 1 |
| 531 | PS 14:1-20:0 | 760.5 | 30 | 311.2 | 50 | 12.23 | ES- | 2 |
| 532 | PS 14:1-20:1 | 758.5 | 30 | 225.3 | 50 | 12.23 | ES- | 1 |
| 533 | PS 14:1-20:1 | 758.5 | 30 | 309.2 | 50 | 12.23 | ES- | 2 |
| 534 | PS 14:1-20:2 | 756.5 | 30 | 225.3 | 50 | 12.23 | ES- | 1 |
| 535 | PS 14:1-20:2 | 756.5 | 30 | 307.2 | 50 | 12.23 | ES- | 2 |
| 536 | PS 14:1-20:3 | 754.5 | 30 | 225.3 | 50 | 12.23 | ES- | 1 |
| 537 | PS 14:1-20:3 | 754.5 | 30 | 305.2 | 50 | 12.23 | ES- | 2 |
| 538 | PS 14:1-20:4 | 752.5 | 30 | 225.3 | 50 | 12.23 | ES- | 1 |
| 539 | PS 14:1-20:4 | 752.5 | 30 | 303.2 | 50 | 12.23 | ES- | 2 |
| 540 | PS 14:1-20:5 | 750.4 | 30 | 225.3 | 50 | 12.23 | ES- | 1 |
| 541 | PS 14:1-20:5 | 750.4 | 30 | 301.2 | 50 | 12.23 | ES- | 2 |
| 542 | PS 14:1-22:0 | 788.5 | 30 | 225.3 | 50 | 12.23 | ES- | 1 |
| 543 | PS 14:1-22:0 | 788.5 | 30 | 339.2 | 50 | 12.23 | ES- | 2 |
| 544 | PS 14:1-22:1 | 786.5 | 30 | 225.3 | 50 | 12.23 | ES- | 1 |
| 545 | PS 14:1-22:1 | 786.5 | 30 | 337.2 | 50 | 12.23 | ES- | 2 |
| 546 | PS 14:1-22:2 | 784.5 | 30 | 225.3 | 50 | 12.23 | ES- | 1 |
| 547 | PS 14:1-22:2 | 784.5 | 30 | 335.2 | 50 | 12.23 | ES- | 2 |
| 548 | PS 14:1-22:3 | 782.5 | 30 | 225.3 | 50 | 12.23 | ES- | 1 |

|     |              |       |    |       |    |       |     |   |
|-----|--------------|-------|----|-------|----|-------|-----|---|
| 549 | PS 14:1-22:3 | 782.5 | 30 | 333.2 | 50 | 12.23 | ES- | 2 |
| 550 | PS 14:1-22:4 | 780.5 | 30 | 225.3 | 50 | 12.23 | ES- | 1 |
| 551 | PS 14:1-22:4 | 780.5 | 30 | 331.2 | 50 | 12.23 | ES- | 2 |
| 552 | PS 14:1-22:5 | 778.5 | 30 | 225.3 | 50 | 12.23 | ES- | 1 |
| 553 | PS 14:1-22:5 | 778.5 | 30 | 329.2 | 50 | 12.23 | ES- | 2 |
| 554 | PS 14:1-22:6 | 776.5 | 30 | 225.3 | 50 | 12.23 | ES- | 1 |
| 555 | PS 14:1-22:6 | 776.5 | 30 | 327.2 | 50 | 12.23 | ES- | 2 |
| 556 | PS 16:0-16:0 | 734.5 | 30 | 255.3 | 50 | 12.23 | ES- | 1 |
| 557 | PS 16:0-16:1 | 732.5 | 30 | 253.3 | 50 | 12.23 | ES- | 1 |
| 558 | PS 16:0-16:1 | 732.5 | 30 | 255.3 | 50 | 12.23 | ES- | 2 |
| 559 | PS 16:0-18:0 | 762.5 | 30 | 255.3 | 50 | 12.23 | ES- | 1 |
| 560 | PS 16:0-18:0 | 762.5 | 30 | 283.3 | 50 | 12.23 | ES- | 2 |
| 561 | PS 16:0-18:1 | 760.5 | 30 | 255.3 | 50 | 12.23 | ES- | 1 |
| 562 | PS 16:0-18:1 | 760.5 | 30 | 281.3 | 50 | 12.23 | ES- | 2 |
| 563 | PS 16:0-18:2 | 758.5 | 30 | 255.3 | 50 | 12.23 | ES- | 1 |
| 564 | PS 16:0-18:2 | 758.5 | 30 | 279.3 | 50 | 12.23 | ES- | 2 |
| 565 | PS 16:0-18:3 | 756.5 | 30 | 255.3 | 50 | 12.23 | ES- | 1 |
| 566 | PS 16:0-18:3 | 756.5 | 30 | 277.3 | 50 | 12.23 | ES- | 2 |
| 567 | PS 16:0-18:4 | 754.5 | 30 | 255.3 | 50 | 12.23 | ES- | 1 |
| 568 | PS 16:0-18:4 | 754.5 | 30 | 275.3 | 50 | 12.23 | ES- | 2 |

Method 10: PC, PE, PG, and PS (2)

| No | Name         | Precursor | CV (V) | Product | CE (V) | RT setting (min) | IonMode | Ion |
|----|--------------|-----------|--------|---------|--------|------------------|---------|-----|
| 1  | PC 16:0-20:0 | 848.6     | 15     | 255.3   | 40     | 5.46             | ES-     | 1   |
| 2  | PC 16:0-20:0 | 848.6     | 15     | 311.2   | 40     | 5.46             | ES-     | 2   |
| 3  | PC 16:0-20:1 | 846.6     | 15     | 255.3   | 40     | 5.46             | ES-     | 1   |
| 4  | PC 16:0-20:1 | 846.6     | 15     | 309.2   | 40     | 5.46             | ES-     | 2   |
| 5  | PC 16:0-20:2 | 844.6     | 15     | 255.3   | 40     | 5.46             | ES-     | 1   |
| 6  | PC 16:0-20:2 | 844.6     | 15     | 307.2   | 40     | 5.46             | ES-     | 2   |
| 7  | PC 16:0-20:3 | 842.6     | 15     | 255.3   | 40     | 5.46             | ES-     | 1   |
| 8  | PC 16:0-20:3 | 842.6     | 15     | 305.2   | 40     | 5.46             | ES-     | 2   |
| 9  | PC 16:0-20:4 | 840.6     | 15     | 255.3   | 40     | 5.46             | ES-     | 1   |
| 10 | PC 16:0-20:4 | 840.6     | 15     | 303.2   | 40     | 5.46             | ES-     | 2   |
| 11 | PC 16:0-20:5 | 838.6     | 15     | 255.3   | 40     | 5.46             | ES-     | 1   |
| 12 | PC 16:0-20:5 | 838.6     | 15     | 301.2   | 40     | 5.46             | ES-     | 2   |
| 13 | PC 16:0-22:0 | 876.7     | 15     | 255.3   | 40     | 5.46             | ES-     | 1   |

|    |              |       |    |       |    |      |     |   |
|----|--------------|-------|----|-------|----|------|-----|---|
| 14 | PC 16:0-22:0 | 876.7 | 15 | 339.2 | 40 | 5.46 | ES- | 2 |
| 15 | PC 16:0-22:1 | 874.7 | 15 | 255.3 | 40 | 5.46 | ES- | 1 |
| 16 | PC 16:0-22:1 | 874.7 | 15 | 337.2 | 40 | 5.46 | ES- | 2 |
| 17 | PC 16:0-22:2 | 872.6 | 15 | 255.3 | 40 | 5.46 | ES- | 1 |
| 18 | PC 16:0-22:2 | 872.6 | 15 | 335.2 | 40 | 5.46 | ES- | 2 |
| 19 | PC 16:0-22:3 | 870.6 | 15 | 255.3 | 40 | 5.46 | ES- | 1 |
| 20 | PC 16:0-22:3 | 870.6 | 15 | 333.2 | 40 | 5.46 | ES- | 2 |
| 21 | PC 16:0-22:4 | 868.6 | 15 | 255.3 | 40 | 5.46 | ES- | 1 |
| 22 | PC 16:0-22:4 | 868.6 | 15 | 331.2 | 40 | 5.46 | ES- | 2 |
| 23 | PC 16:0-22:5 | 866.6 | 15 | 255.3 | 40 | 5.46 | ES- | 1 |
| 24 | PC 16:0-22:5 | 866.6 | 15 | 329.2 | 40 | 5.46 | ES- | 2 |
| 25 | PC 16:0-22:6 | 864.6 | 15 | 255.3 | 40 | 5.46 | ES- | 1 |
| 26 | PC 16:0-22:6 | 864.6 | 15 | 327.2 | 40 | 5.46 | ES- | 2 |
| 27 | PC 16:1-16:1 | 788.5 | 15 | 253.3 | 40 | 5.46 | ES- | 1 |
| 28 | PC 16:1-18:0 | 818.6 | 15 | 253.3 | 40 | 5.46 | ES- | 1 |
| 29 | PC 16:1-18:0 | 818.6 | 15 | 283.3 | 40 | 5.46 | ES- | 2 |
| 30 | PC 16:1-18:1 | 816.6 | 15 | 253.3 | 40 | 5.46 | ES- | 1 |
| 31 | PC 16:1-18:1 | 816.6 | 15 | 281.3 | 40 | 5.46 | ES- | 2 |
| 32 | PC 16:1-18:2 | 814.6 | 15 | 253.3 | 40 | 5.46 | ES- | 1 |
| 33 | PC 16:1-18:2 | 814.6 | 15 | 279.3 | 40 | 5.46 | ES- | 2 |
| 34 | PC 16:1-18:3 | 812.5 | 15 | 253.3 | 40 | 5.46 | ES- | 1 |
| 35 | PC 16:1-18:3 | 812.5 | 15 | 277.3 | 40 | 5.46 | ES- | 2 |
| 36 | PC 16:1-18:4 | 810.5 | 15 | 253.3 | 40 | 5.46 | ES- | 1 |
| 37 | PC 16:1-18:4 | 810.5 | 15 | 275.3 | 40 | 5.46 | ES- | 2 |
| 38 | PC 16:1-20:0 | 846.6 | 15 | 253.3 | 40 | 5.46 | ES- | 1 |
| 39 | PC 16:1-20:0 | 846.6 | 15 | 311.2 | 40 | 5.46 | ES- | 2 |
| 40 | PC 16:1-20:1 | 844.6 | 15 | 253.3 | 40 | 5.46 | ES- | 1 |
| 41 | PC 16:1-20:1 | 844.6 | 15 | 309.2 | 40 | 5.46 | ES- | 2 |
| 42 | PC 16:1-20:2 | 842.6 | 15 | 253.3 | 40 | 5.46 | ES- | 1 |
| 43 | PC 16:1-20:2 | 842.6 | 15 | 307.2 | 40 | 5.46 | ES- | 2 |
| 44 | PC 16:1-20:3 | 840.6 | 15 | 253.3 | 40 | 5.46 | ES- | 1 |
| 45 | PC 16:1-20:3 | 840.6 | 15 | 305.2 | 40 | 5.46 | ES- | 2 |
| 46 | PC 16:1-20:4 | 838.6 | 15 | 253.3 | 40 | 5.46 | ES- | 1 |
| 47 | PC 16:1-20:4 | 838.6 | 15 | 303.2 | 40 | 5.46 | ES- | 2 |
| 48 | PC 16:1-20:5 | 836.5 | 15 | 253.3 | 40 | 5.46 | ES- | 1 |

|    |              |       |    |       |    |      |     |   |
|----|--------------|-------|----|-------|----|------|-----|---|
| 49 | PC 16:1-20:5 | 836.5 | 15 | 301.2 | 40 | 5.46 | ES- | 2 |
| 50 | PC 16:1-22:0 | 874.7 | 15 | 253.3 | 40 | 5.46 | ES- | 1 |
| 51 | PC 16:1-22:0 | 874.7 | 15 | 339.2 | 40 | 5.46 | ES- | 2 |
| 52 | PC 16:1-22:1 | 872.6 | 15 | 253.3 | 40 | 5.46 | ES- | 1 |
| 53 | PC 16:1-22:1 | 872.6 | 15 | 337.2 | 40 | 5.46 | ES- | 2 |
| 54 | PC 16:1-22:2 | 870.6 | 15 | 253.3 | 40 | 5.46 | ES- | 1 |
| 55 | PC 16:1-22:2 | 870.6 | 15 | 335.2 | 40 | 5.46 | ES- | 2 |
| 56 | PC 16:1-22:3 | 868.6 | 15 | 253.3 | 40 | 5.46 | ES- | 1 |
| 57 | PC 16:1-22:3 | 868.6 | 15 | 333.2 | 40 | 5.46 | ES- | 2 |
| 58 | PC 16:1-22:4 | 866.6 | 15 | 253.3 | 40 | 5.46 | ES- | 1 |
| 59 | PC 16:1-22:4 | 866.6 | 15 | 331.2 | 40 | 5.46 | ES- | 2 |
| 60 | PC 16:1-22:5 | 864.6 | 15 | 253.3 | 40 | 5.46 | ES- | 1 |
| 61 | PC 16:1-22:5 | 864.6 | 15 | 329.2 | 40 | 5.46 | ES- | 2 |
| 62 | PC 16:1-22:6 | 862.6 | 15 | 253.3 | 40 | 5.46 | ES- | 1 |
| 63 | PC 16:1-22:6 | 862.6 | 15 | 327.2 | 40 | 5.46 | ES- | 2 |
| 64 | PC 17:0-17:0 | 820.6 | 15 | 269.3 | 40 | 5.46 | ES- | 1 |
| 65 | PC 18:0-18:0 | 848.6 | 15 | 283.3 | 40 | 5.46 | ES- | 1 |
| 66 | PC 18:0-18:1 | 846.6 | 15 | 281.3 | 40 | 5.46 | ES- | 1 |
| 67 | PC 18:0-18:1 | 846.6 | 15 | 283.3 | 40 | 5.46 | ES- | 2 |
| 68 | PC 18:0-18:2 | 844.6 | 15 | 279.3 | 40 | 5.46 | ES- | 1 |
| 69 | PC 18:0-18:2 | 844.6 | 15 | 283.3 | 40 | 5.46 | ES- | 2 |
| 70 | PC 18:0-18:3 | 842.6 | 15 | 277.3 | 40 | 5.46 | ES- | 1 |
| 71 | PC 18:0-18:3 | 842.6 | 15 | 283.3 | 40 | 5.46 | ES- | 2 |
| 72 | PC 18:0-18:4 | 840.6 | 15 | 275.3 | 40 | 5.46 | ES- | 1 |
| 73 | PC 18:0-18:4 | 840.6 | 15 | 283.3 | 40 | 5.46 | ES- | 2 |
| 74 | PC 18:0-20:0 | 876.7 | 15 | 283.3 | 40 | 5.46 | ES- | 1 |
| 75 | PC 18:0-20:0 | 876.7 | 15 | 311.2 | 40 | 5.46 | ES- | 2 |
| 76 | PC 18:0-20:1 | 874.7 | 15 | 283.3 | 40 | 5.46 | ES- | 1 |
| 77 | PC 18:0-20:1 | 874.7 | 15 | 309.2 | 40 | 5.46 | ES- | 2 |
| 78 | PC 18:0-20:2 | 872.6 | 15 | 283.3 | 40 | 5.46 | ES- | 1 |
| 79 | PC 18:0-20:2 | 872.6 | 15 | 307.2 | 40 | 5.46 | ES- | 2 |
| 80 | PC 18:0-20:3 | 870.6 | 15 | 283.3 | 40 | 5.46 | ES- | 1 |
| 81 | PC 18:0-20:3 | 870.6 | 15 | 305.2 | 40 | 5.46 | ES- | 2 |
| 82 | PC 18:0-20:4 | 868.6 | 15 | 283.3 | 40 | 5.46 | ES- | 1 |
| 83 | PC 18:0-20:4 | 868.6 | 15 | 303.2 | 40 | 5.46 | ES- | 2 |



|     |              |       |    |       |    |      |     |   |
|-----|--------------|-------|----|-------|----|------|-----|---|
| 84  | PC 18:0-20:5 | 866.6 | 15 | 283.3 | 40 | 5.46 | ES- | 1 |
| 85  | PC 18:0-20:5 | 866.6 | 15 | 301.2 | 40 | 5.46 | ES- | 2 |
| 86  | PC 18:0-22:0 | 904.7 | 15 | 283.3 | 40 | 5.46 | ES- | 1 |
| 87  | PC 18:0-22:0 | 904.7 | 15 | 339.2 | 40 | 5.46 | ES- | 2 |
| 88  | PC 18:0-22:1 | 902.7 | 15 | 283.3 | 40 | 5.46 | ES- | 1 |
| 89  | PC 18:0-22:1 | 902.7 | 15 | 337.2 | 40 | 5.46 | ES- | 2 |
| 90  | PC 18:0-22:2 | 900.7 | 15 | 283.3 | 40 | 5.46 | ES- | 1 |
| 91  | PC 18:0-22:2 | 900.7 | 15 | 335.2 | 40 | 5.46 | ES- | 2 |
| 92  | PC 18:0-22:3 | 898.7 | 15 | 283.3 | 40 | 5.46 | ES- | 1 |
| 93  | PC 18:0-22:3 | 898.7 | 15 | 333.2 | 40 | 5.46 | ES- | 2 |
| 94  | PC 18:0-22:4 | 896.6 | 15 | 283.3 | 40 | 5.46 | ES- | 1 |
| 95  | PC 18:0-22:4 | 896.6 | 15 | 331.2 | 40 | 5.46 | ES- | 2 |
| 96  | PC 18:0-22:5 | 894.6 | 15 | 283.3 | 40 | 5.46 | ES- | 1 |
| 97  | PC 18:0-22:5 | 894.6 | 15 | 329.2 | 40 | 5.46 | ES- | 2 |
| 98  | PC 18:0-22:6 | 892.6 | 15 | 283.3 | 40 | 5.46 | ES- | 1 |
| 99  | PC 18:0-22:6 | 892.6 | 15 | 327.2 | 40 | 5.46 | ES- | 2 |
| 100 | PC 18:1-18:1 | 844.6 | 15 | 281.3 | 40 | 5.46 | ES- | 1 |
| 101 | PC 18:1-18:2 | 842.6 | 15 | 279.3 | 40 | 5.46 | ES- | 1 |
| 102 | PC 18:1-18:2 | 842.6 | 15 | 281.3 | 40 | 5.46 | ES- | 2 |
| 103 | PC 18:1-18:3 | 840.6 | 15 | 277.3 | 40 | 5.46 | ES- | 1 |
| 104 | PC 18:1-18:3 | 840.6 | 15 | 281.3 | 40 | 5.46 | ES- | 2 |
| 105 | PC 18:1-18:4 | 838.6 | 15 | 275.3 | 40 | 5.46 | ES- | 1 |
| 106 | PC 18:1-18:4 | 838.6 | 15 | 281.3 | 40 | 5.46 | ES- | 2 |
| 107 | PC 18:1-20:0 | 874.7 | 15 | 281.3 | 40 | 5.46 | ES- | 1 |
| 108 | PC 18:1-20:0 | 874.7 | 15 | 311.2 | 40 | 5.46 | ES- | 2 |
| 109 | PC 18:1-20:1 | 872.6 | 15 | 281.3 | 40 | 5.46 | ES- | 1 |
| 110 | PC 18:1-20:1 | 872.6 | 15 | 309.2 | 40 | 5.46 | ES- | 2 |
| 111 | PC 18:1-20:2 | 870.6 | 15 | 281.3 | 40 | 5.46 | ES- | 1 |
| 112 | PC 18:1-20:2 | 870.6 | 15 | 307.2 | 40 | 5.46 | ES- | 2 |
| 113 | PC 18:1-20:3 | 868.6 | 15 | 281.3 | 40 | 5.46 | ES- | 1 |
| 114 | PC 18:1-20:3 | 868.6 | 15 | 305.2 | 40 | 5.46 | ES- | 2 |
| 115 | PC 18:1-20:4 | 866.6 | 15 | 281.3 | 40 | 5.46 | ES- | 1 |
| 116 | PC 18:1-20:4 | 866.6 | 15 | 303.2 | 40 | 5.46 | ES- | 2 |
| 117 | PC 18:1-20:5 | 864.6 | 15 | 281.3 | 40 | 5.46 | ES- | 1 |
| 118 | PC 18:1-20:5 | 864.6 | 15 | 301.2 | 40 | 5.46 | ES- | 2 |

|     |              |       |    |       |    |      |     |   |
|-----|--------------|-------|----|-------|----|------|-----|---|
| 119 | PC 18:1-22:0 | 902.7 | 15 | 281.3 | 40 | 5.46 | ES- | 1 |
| 120 | PC 18:1-22:0 | 902.7 | 15 | 339.2 | 40 | 5.46 | ES- | 2 |
| 121 | PC 18:1-22:1 | 900.7 | 15 | 281.3 | 40 | 5.46 | ES- | 1 |
| 122 | PC 18:1-22:1 | 900.7 | 15 | 337.2 | 40 | 5.46 | ES- | 2 |
| 123 | PC 18:1-22:2 | 898.7 | 15 | 281.3 | 40 | 5.46 | ES- | 1 |
| 124 | PC 18:1-22:2 | 898.7 | 15 | 335.2 | 40 | 5.46 | ES- | 2 |
| 125 | PC 18:1-22:3 | 896.6 | 15 | 281.3 | 40 | 5.46 | ES- | 1 |
| 126 | PC 18:1-22:3 | 896.6 | 15 | 333.2 | 40 | 5.46 | ES- | 2 |
| 127 | PC 18:1-22:4 | 894.6 | 15 | 281.3 | 40 | 5.46 | ES- | 1 |
| 128 | PC 18:1-22:4 | 894.6 | 15 | 331.2 | 40 | 5.46 | ES- | 2 |
| 129 | PC 18:1-22:5 | 892.6 | 15 | 281.3 | 40 | 5.46 | ES- | 1 |
| 130 | PC 18:1-22:5 | 892.6 | 15 | 329.2 | 40 | 5.46 | ES- | 2 |
| 131 | PC 18:1-22:6 | 890.6 | 15 | 281.3 | 40 | 5.46 | ES- | 1 |
| 132 | PC 18:1-22:6 | 890.6 | 15 | 327.2 | 40 | 5.46 | ES- | 2 |
| 133 | PC 18:2-18:2 | 840.6 | 15 | 279.3 | 40 | 5.46 | ES- | 1 |
| 134 | PC 18:2-18:3 | 838.6 | 15 | 277.3 | 40 | 5.46 | ES- | 1 |
| 135 | PC 18:2-18:3 | 838.6 | 15 | 279.3 | 40 | 5.46 | ES- | 2 |
| 136 | PC 18:2-18:4 | 836.5 | 15 | 275.3 | 40 | 5.46 | ES- | 1 |
| 137 | PC 18:2-18:4 | 836.5 | 15 | 279.3 | 40 | 5.46 | ES- | 2 |
| 138 | PC 18:2-20:0 | 872.6 | 15 | 279.3 | 40 | 5.46 | ES- | 1 |
| 139 | PC 18:2-20:0 | 872.6 | 15 | 311.2 | 40 | 5.46 | ES- | 2 |
| 140 | PC 18:2-20:1 | 870.6 | 15 | 279.3 | 40 | 5.46 | ES- | 1 |
| 141 | PC 18:2-20:1 | 870.6 | 15 | 309.2 | 40 | 5.46 | ES- | 2 |
| 142 | PC 18:2-20:2 | 868.6 | 15 | 279.3 | 40 | 5.46 | ES- | 1 |
| 143 | PC 18:2-20:2 | 868.6 | 15 | 307.2 | 40 | 5.46 | ES- | 2 |
| 144 | PC 18:2-20:3 | 866.6 | 15 | 279.3 | 40 | 5.46 | ES- | 1 |
| 145 | PC 18:2-20:3 | 866.6 | 15 | 305.2 | 40 | 5.46 | ES- | 2 |
| 146 | PC 18:2-20:4 | 864.6 | 15 | 279.3 | 40 | 5.46 | ES- | 1 |
| 147 | PC 18:2-20:4 | 864.6 | 15 | 303.2 | 40 | 5.46 | ES- | 2 |
| 148 | PC 18:2-20:5 | 862.6 | 15 | 279.3 | 40 | 5.46 | ES- | 1 |
| 149 | PC 18:2-20:5 | 862.6 | 15 | 301.2 | 40 | 5.46 | ES- | 2 |
| 150 | PE 16:0-20:0 | 746.6 | 50 | 255.3 | 25 | 6.32 | ES- | 1 |
| 151 | PE 16:0-20:0 | 746.6 | 50 | 311.2 | 25 | 6.32 | ES- | 2 |
| 152 | PE 16:0-20:1 | 744.6 | 50 | 255.3 | 25 | 6.32 | ES- | 1 |
| 153 | PE 16:0-20:1 | 744.6 | 50 | 309.2 | 25 | 6.32 | ES- | 2 |

|     |              |       |    |       |    |      |     |   |
|-----|--------------|-------|----|-------|----|------|-----|---|
| 154 | PE 16:0-20:2 | 742.5 | 50 | 255.3 | 25 | 6.32 | ES- | 1 |
| 155 | PE 16:0-20:2 | 742.5 | 50 | 307.2 | 25 | 6.32 | ES- | 2 |
| 156 | PE 16:0-20:3 | 740.5 | 50 | 255.3 | 25 | 6.32 | ES- | 1 |
| 157 | PE 16:0-20:3 | 740.5 | 50 | 305.2 | 25 | 6.32 | ES- | 2 |
| 158 | PE 16:0-20:4 | 738.5 | 50 | 255.3 | 25 | 6.32 | ES- | 1 |
| 159 | PE 16:0-20:4 | 738.5 | 50 | 303.2 | 25 | 6.32 | ES- | 2 |
| 160 | PE 16:0-20:5 | 736.5 | 50 | 255.3 | 25 | 6.32 | ES- | 1 |
| 161 | PE 16:0-20:5 | 736.5 | 50 | 301.2 | 25 | 6.32 | ES- | 2 |
| 162 | PE 16:0-22:0 | 774.6 | 50 | 255.3 | 25 | 6.32 | ES- | 1 |
| 163 | PE 16:0-22:0 | 774.6 | 50 | 339.2 | 25 | 6.32 | ES- | 2 |
| 164 | PE 16:0-22:1 | 772.6 | 50 | 255.3 | 25 | 6.32 | ES- | 1 |
| 165 | PE 16:0-22:1 | 772.6 | 50 | 337.2 | 25 | 6.32 | ES- | 2 |
| 166 | PE 16:0-22:2 | 770.6 | 50 | 255.3 | 25 | 6.32 | ES- | 1 |
| 167 | PE 16:0-22:2 | 770.6 | 50 | 335.2 | 25 | 6.32 | ES- | 2 |
| 168 | PE 16:0-22:3 | 768.6 | 50 | 255.3 | 25 | 6.32 | ES- | 1 |
| 169 | PE 16:0-22:3 | 768.6 | 50 | 333.2 | 25 | 6.32 | ES- | 2 |
| 170 | PE 16:0-22:4 | 766.5 | 50 | 255.3 | 25 | 6.32 | ES- | 1 |
| 171 | PE 16:0-22:4 | 766.5 | 50 | 331.2 | 25 | 6.32 | ES- | 2 |
| 172 | PE 16:0-22:5 | 764.5 | 50 | 255.3 | 25 | 6.32 | ES- | 1 |
| 173 | PE 16:0-22:5 | 764.5 | 50 | 329.2 | 25 | 6.32 | ES- | 2 |
| 174 | PE 16:0-22:6 | 762.5 | 50 | 255.3 | 25 | 6.32 | ES- | 1 |
| 175 | PE 16:0-22:6 | 762.5 | 50 | 327.2 | 25 | 6.32 | ES- | 2 |
| 176 | PE 16:1-16:1 | 686.5 | 50 | 253.3 | 25 | 6.32 | ES- | 1 |
| 177 | PE 16:1-18:0 | 716.5 | 50 | 253.3 | 25 | 6.32 | ES- | 1 |
| 178 | PE 16:1-18:0 | 716.5 | 50 | 283.3 | 25 | 6.32 | ES- | 2 |
| 179 | PE 16:1-18:1 | 714.5 | 50 | 253.3 | 25 | 6.32 | ES- | 1 |
| 180 | PE 16:1-18:1 | 714.5 | 50 | 281.3 | 25 | 6.32 | ES- | 2 |
| 181 | PE 16:1-18:2 | 712.5 | 50 | 253.3 | 25 | 6.32 | ES- | 1 |
| 182 | PE 16:1-18:2 | 712.5 | 50 | 279.3 | 25 | 6.32 | ES- | 2 |
| 183 | PE 16:1-18:3 | 710.5 | 50 | 253.3 | 25 | 6.32 | ES- | 1 |
| 184 | PE 16:1-18:3 | 710.5 | 50 | 277.3 | 25 | 6.32 | ES- | 2 |
| 185 | PE 16:1-18:4 | 708.5 | 50 | 253.3 | 25 | 6.32 | ES- | 1 |
| 186 | PE 16:1-18:4 | 708.5 | 50 | 275.3 | 25 | 6.32 | ES- | 2 |
| 187 | PE 16:1-20:0 | 744.6 | 50 | 253.3 | 25 | 6.32 | ES- | 1 |
| 188 | PE 16:1-20:0 | 744.6 | 50 | 311.2 | 25 | 6.32 | ES- | 2 |

|     |              |       |    |       |    |      |     |   |
|-----|--------------|-------|----|-------|----|------|-----|---|
| 189 | PE 16:1-20:1 | 742.5 | 50 | 253.3 | 25 | 6.32 | ES- | 1 |
| 190 | PE 16:1-20:1 | 742.5 | 50 | 309.2 | 25 | 6.32 | ES- | 2 |
| 191 | PE 16:1-20:2 | 740.5 | 50 | 253.3 | 25 | 6.32 | ES- | 1 |
| 192 | PE 16:1-20:2 | 740.5 | 50 | 307.2 | 25 | 6.32 | ES- | 2 |
| 193 | PE 16:1-20:3 | 738.5 | 50 | 253.3 | 25 | 6.32 | ES- | 1 |
| 194 | PE 16:1-20:3 | 738.5 | 50 | 305.2 | 25 | 6.32 | ES- | 2 |
| 195 | PE 16:1-20:4 | 736.5 | 50 | 253.3 | 25 | 6.32 | ES- | 1 |
| 196 | PE 16:1-20:4 | 736.5 | 50 | 303.2 | 25 | 6.32 | ES- | 2 |
| 197 | PE 16:1-20:5 | 734.5 | 50 | 253.3 | 25 | 6.32 | ES- | 1 |
| 198 | PE 16:1-20:5 | 734.5 | 50 | 301.2 | 25 | 6.32 | ES- | 2 |
| 199 | PE 16:1-22:0 | 772.6 | 50 | 253.3 | 25 | 6.32 | ES- | 1 |
| 200 | PE 16:1-22:0 | 772.6 | 50 | 339.2 | 25 | 6.32 | ES- | 2 |
| 201 | PE 16:1-22:1 | 770.6 | 50 | 253.3 | 25 | 6.32 | ES- | 1 |
| 202 | PE 16:1-22:1 | 770.6 | 50 | 337.2 | 25 | 6.32 | ES- | 2 |
| 203 | PE 16:1-22:2 | 768.6 | 50 | 253.3 | 25 | 6.32 | ES- | 1 |
| 204 | PE 16:1-22:2 | 768.6 | 50 | 335.2 | 25 | 6.32 | ES- | 2 |
| 205 | PE 16:1-22:3 | 766.5 | 50 | 253.3 | 25 | 6.32 | ES- | 1 |
| 206 | PE 16:1-22:3 | 766.5 | 50 | 333.2 | 25 | 6.32 | ES- | 2 |
| 207 | PE 16:1-22:4 | 764.5 | 50 | 253.3 | 25 | 6.32 | ES- | 1 |
| 208 | PE 16:1-22:4 | 764.5 | 50 | 331.2 | 25 | 6.32 | ES- | 2 |
| 209 | PE 16:1-22:5 | 762.5 | 50 | 253.3 | 25 | 6.32 | ES- | 1 |
| 210 | PE 16:1-22:5 | 762.5 | 50 | 329.2 | 25 | 6.32 | ES- | 2 |
| 211 | PE 16:1-22:6 | 760.5 | 50 | 253.3 | 25 | 6.32 | ES- | 1 |
| 212 | PE 16:1-22:6 | 760.5 | 50 | 327.2 | 25 | 6.32 | ES- | 2 |
| 213 | PE 17:0-17:0 | 718.5 | 50 | 269.3 | 25 | 6.32 | ES- | 1 |
| 214 | PE 18:0-18:0 | 746.6 | 50 | 283.3 | 25 | 6.32 | ES- | 1 |
| 215 | PE 18:0-18:1 | 744.6 | 50 | 281.3 | 25 | 6.32 | ES- | 1 |
| 216 | PE 18:0-18:1 | 744.6 | 50 | 283.3 | 25 | 6.32 | ES- | 2 |
| 217 | PE 18:0-18:2 | 742.5 | 50 | 279.3 | 25 | 6.32 | ES- | 1 |
| 218 | PE 18:0-18:2 | 742.5 | 50 | 283.3 | 25 | 6.32 | ES- | 2 |
| 219 | PE 18:0-18:3 | 740.5 | 50 | 277.3 | 25 | 6.32 | ES- | 1 |
| 220 | PE 18:0-18:3 | 740.5 | 50 | 283.3 | 25 | 6.32 | ES- | 2 |
| 221 | PE 18:0-18:4 | 738.5 | 50 | 275.3 | 25 | 6.32 | ES- | 1 |
| 222 | PE 18:0-18:4 | 738.5 | 50 | 283.3 | 25 | 6.32 | ES- | 2 |
| 223 | PE 18:0-20:0 | 774.6 | 50 | 283.3 | 25 | 6.32 | ES- | 1 |

|     |              |       |    |       |    |      |     |   |
|-----|--------------|-------|----|-------|----|------|-----|---|
| 224 | PE 18:0-20:0 | 774.6 | 50 | 311.2 | 25 | 6.32 | ES- | 2 |
| 225 | PE 18:0-20:1 | 772.6 | 50 | 283.3 | 25 | 6.32 | ES- | 1 |
| 226 | PE 18:0-20:1 | 772.6 | 50 | 309.2 | 25 | 6.32 | ES- | 2 |
| 227 | PE 18:0-20:2 | 770.6 | 50 | 283.3 | 25 | 6.32 | ES- | 1 |
| 228 | PE 18:0-20:2 | 770.6 | 50 | 307.2 | 25 | 6.32 | ES- | 2 |
| 229 | PE 18:0-20:3 | 768.6 | 50 | 283.3 | 25 | 6.32 | ES- | 1 |
| 230 | PE 18:0-20:3 | 768.6 | 50 | 305.2 | 25 | 6.32 | ES- | 2 |
| 231 | PE 18:0-20:4 | 766.5 | 50 | 283.3 | 25 | 6.32 | ES- | 1 |
| 232 | PE 18:0-20:4 | 766.5 | 50 | 303.2 | 25 | 6.32 | ES- | 2 |
| 233 | PE 18:0-20:5 | 764.5 | 50 | 283.3 | 25 | 6.32 | ES- | 1 |
| 234 | PE 18:0-20:5 | 764.5 | 50 | 301.2 | 25 | 6.32 | ES- | 2 |
| 235 | PE 18:0-22:0 | 802.6 | 50 | 283.3 | 25 | 6.32 | ES- | 1 |
| 236 | PE 18:0-22:0 | 802.6 | 50 | 339.2 | 25 | 6.32 | ES- | 2 |
| 237 | PE 18:0-22:1 | 800.6 | 50 | 283.3 | 25 | 6.32 | ES- | 1 |
| 238 | PE 18:0-22:1 | 800.6 | 50 | 337.2 | 25 | 6.32 | ES- | 2 |
| 239 | PE 18:0-22:2 | 798.6 | 50 | 283.3 | 25 | 6.32 | ES- | 1 |
| 240 | PE 18:0-22:2 | 798.6 | 50 | 335.2 | 25 | 6.32 | ES- | 2 |
| 241 | PE 18:0-22:3 | 796.6 | 50 | 283.3 | 25 | 6.32 | ES- | 1 |
| 242 | PE 18:0-22:3 | 796.6 | 50 | 333.2 | 25 | 6.32 | ES- | 2 |
| 243 | PE 18:0-22:4 | 794.6 | 50 | 283.3 | 25 | 6.32 | ES- | 1 |
| 244 | PE 18:0-22:4 | 794.6 | 50 | 331.2 | 25 | 6.32 | ES- | 2 |
| 245 | PE 18:0-22:5 | 792.6 | 50 | 283.3 | 25 | 6.32 | ES- | 1 |
| 246 | PE 18:0-22:5 | 792.6 | 50 | 329.2 | 25 | 6.32 | ES- | 2 |
| 247 | PE 18:0-22:6 | 790.5 | 50 | 283.3 | 25 | 6.32 | ES- | 1 |
| 248 | PE 18:0-22:6 | 790.5 | 50 | 327.2 | 25 | 6.32 | ES- | 2 |
| 249 | PE 18:1-18:1 | 742.5 | 50 | 281.3 | 25 | 6.32 | ES- | 1 |
| 250 | PE 18:1-18:2 | 740.5 | 50 | 279.3 | 25 | 6.32 | ES- | 1 |
| 251 | PE 18:1-18:2 | 740.5 | 50 | 281.3 | 25 | 6.32 | ES- | 2 |
| 252 | PE 18:1-18:3 | 738.5 | 50 | 277.3 | 25 | 6.32 | ES- | 1 |
| 253 | PE 18:1-18:3 | 738.5 | 50 | 281.3 | 25 | 6.32 | ES- | 2 |
| 254 | PE 18:1-18:4 | 736.5 | 50 | 275.3 | 25 | 6.32 | ES- | 1 |
| 255 | PE 18:1-18:4 | 736.5 | 50 | 281.3 | 25 | 6.32 | ES- | 2 |
| 256 | PE 18:1-20:0 | 772.6 | 50 | 281.3 | 25 | 6.32 | ES- | 1 |
| 257 | PE 18:1-20:0 | 772.6 | 50 | 311.2 | 25 | 6.32 | ES- | 2 |
| 258 | PE 18:1-20:1 | 770.6 | 50 | 281.3 | 25 | 6.32 | ES- | 1 |

|     |              |       |    |       |    |      |     |   |
|-----|--------------|-------|----|-------|----|------|-----|---|
| 259 | PE 18:1-20:1 | 770.6 | 50 | 309.2 | 25 | 6.32 | ES- | 2 |
| 260 | PE 18:1-20:2 | 768.6 | 50 | 281.3 | 25 | 6.32 | ES- | 1 |
| 261 | PE 18:1-20:2 | 768.6 | 50 | 307.2 | 25 | 6.32 | ES- | 2 |
| 262 | PE 18:1-20:3 | 766.5 | 50 | 281.3 | 25 | 6.32 | ES- | 1 |
| 263 | PE 18:1-20:3 | 766.5 | 50 | 305.2 | 25 | 6.32 | ES- | 2 |
| 264 | PE 18:1-20:4 | 764.5 | 50 | 281.3 | 25 | 6.32 | ES- | 1 |
| 265 | PE 18:1-20:4 | 764.5 | 50 | 303.2 | 25 | 6.32 | ES- | 2 |
| 266 | PE 18:1-20:5 | 762.5 | 50 | 281.3 | 25 | 6.32 | ES- | 1 |
| 267 | PE 18:1-20:5 | 762.5 | 50 | 301.2 | 25 | 6.32 | ES- | 2 |
| 268 | PE 18:1-22:0 | 800.6 | 50 | 281.3 | 25 | 6.32 | ES- | 1 |
| 269 | PE 18:1-22:0 | 800.6 | 50 | 339.2 | 25 | 6.32 | ES- | 2 |
| 270 | PE 18:1-22:1 | 798.6 | 50 | 281.3 | 25 | 6.32 | ES- | 1 |
| 271 | PE 18:1-22:1 | 798.6 | 50 | 337.2 | 25 | 6.32 | ES- | 2 |
| 272 | PE 18:1-22:2 | 796.6 | 50 | 281.3 | 25 | 6.32 | ES- | 1 |
| 273 | PE 18:1-22:2 | 796.6 | 50 | 335.2 | 25 | 6.32 | ES- | 2 |
| 274 | PE 18:1-22:3 | 794.6 | 50 | 281.3 | 25 | 6.32 | ES- | 1 |
| 275 | PE 18:1-22:3 | 794.6 | 50 | 333.2 | 25 | 6.32 | ES- | 2 |
| 276 | PE 18:1-22:4 | 792.6 | 50 | 281.3 | 25 | 6.32 | ES- | 1 |
| 277 | PE 18:1-22:4 | 792.6 | 50 | 331.2 | 25 | 6.32 | ES- | 2 |
| 278 | PE 18:1-22:5 | 790.5 | 50 | 281.3 | 25 | 6.32 | ES- | 1 |
| 279 | PE 18:1-22:5 | 790.5 | 50 | 329.2 | 25 | 6.32 | ES- | 2 |
| 280 | PE 18:1-22:6 | 788.5 | 50 | 281.3 | 25 | 6.32 | ES- | 1 |
| 281 | PE 18:1-22:6 | 788.5 | 50 | 327.2 | 25 | 6.32 | ES- | 2 |
| 282 | PE 18:2-18:2 | 738.5 | 50 | 279.3 | 25 | 6.32 | ES- | 1 |
| 283 | PE 18:2-18:3 | 736.5 | 50 | 277.3 | 25 | 6.32 | ES- | 1 |
| 284 | PE 18:2-18:3 | 736.5 | 50 | 279.3 | 25 | 6.32 | ES- | 2 |
| 285 | PE 18:2-18:4 | 734.5 | 50 | 275.3 | 25 | 6.32 | ES- | 1 |
| 286 | PE 18:2-18:4 | 734.5 | 50 | 279.3 | 25 | 6.32 | ES- | 2 |
| 287 | PE 18:2-20:0 | 770.6 | 50 | 279.3 | 25 | 6.32 | ES- | 1 |
| 288 | PE 18:2-20:0 | 770.6 | 50 | 311.2 | 25 | 6.32 | ES- | 2 |
| 289 | PE 18:2-20:1 | 768.6 | 50 | 279.3 | 25 | 6.32 | ES- | 1 |
| 290 | PE 18:2-20:1 | 768.6 | 50 | 309.2 | 25 | 6.32 | ES- | 2 |
| 291 | PE 18:2-20:2 | 766.5 | 50 | 279.3 | 25 | 6.32 | ES- | 1 |
| 292 | PE 18:2-20:2 | 766.5 | 50 | 307.2 | 25 | 6.32 | ES- | 2 |
| 293 | PE 18:2-20:3 | 764.5 | 50 | 279.3 | 25 | 6.32 | ES- | 1 |

|     |              |       |    |       |    |      |     |   |
|-----|--------------|-------|----|-------|----|------|-----|---|
| 294 | PE 18:2-20:3 | 764.5 | 50 | 305.2 | 25 | 6.32 | ES- | 2 |
| 295 | PE 18:2-20:4 | 762.5 | 50 | 279.3 | 25 | 6.32 | ES- | 1 |
| 296 | PE 18:2-20:4 | 762.5 | 50 | 303.2 | 25 | 6.32 | ES- | 2 |
| 297 | PE 18:2-20:5 | 760.5 | 50 | 279.3 | 25 | 6.32 | ES- | 1 |
| 298 | PE 18:2-20:5 | 760.5 | 50 | 301.2 | 25 | 6.32 | ES- | 2 |
| 299 | PG 16:0-20:0 | 777.6 | 30 | 255.3 | 40 | 8.99 | ES- | 1 |
| 300 | PG 16:0-20:0 | 777.6 | 30 | 311.2 | 40 | 8.99 | ES- | 2 |
| 301 | PG 16:0-20:1 | 775.5 | 30 | 255.3 | 40 | 8.99 | ES- | 1 |
| 302 | PG 16:0-20:1 | 775.5 | 30 | 309.2 | 40 | 8.99 | ES- | 2 |
| 303 | PG 16:0-20:2 | 773.5 | 30 | 255.3 | 40 | 8.99 | ES- | 1 |
| 304 | PG 16:0-20:2 | 773.5 | 30 | 307.2 | 40 | 8.99 | ES- | 2 |
| 305 | PG 16:0-20:3 | 771.5 | 30 | 255.3 | 40 | 8.99 | ES- | 1 |
| 306 | PG 16:0-20:3 | 771.5 | 30 | 305.2 | 40 | 8.99 | ES- | 2 |
| 307 | PG 16:0-20:4 | 769.5 | 30 | 255.3 | 40 | 8.99 | ES- | 1 |
| 308 | PG 16:0-20:4 | 769.5 | 30 | 303.2 | 40 | 8.99 | ES- | 2 |
| 309 | PG 16:0-20:5 | 767.5 | 30 | 255.3 | 40 | 8.99 | ES- | 1 |
| 310 | PG 16:0-20:5 | 767.5 | 30 | 301.2 | 40 | 8.99 | ES- | 2 |
| 311 | PG 16:0-22:0 | 805.6 | 30 | 255.3 | 40 | 8.99 | ES- | 1 |
| 312 | PG 16:0-22:0 | 805.6 | 30 | 339.2 | 40 | 8.99 | ES- | 2 |
| 313 | PG 16:0-22:1 | 803.6 | 30 | 255.3 | 40 | 8.99 | ES- | 1 |
| 314 | PG 16:0-22:1 | 803.6 | 30 | 337.2 | 40 | 8.99 | ES- | 2 |
| 315 | PG 16:0-22:2 | 801.6 | 30 | 255.3 | 40 | 8.99 | ES- | 1 |
| 316 | PG 16:0-22:2 | 801.6 | 30 | 335.2 | 40 | 8.99 | ES- | 2 |
| 317 | PG 16:0-22:3 | 799.5 | 30 | 255.3 | 40 | 8.99 | ES- | 1 |
| 318 | PG 16:0-22:3 | 799.5 | 30 | 333.2 | 40 | 8.99 | ES- | 2 |
| 319 | PG 16:0-22:4 | 797.5 | 30 | 255.3 | 40 | 8.99 | ES- | 1 |
| 320 | PG 16:0-22:4 | 797.5 | 30 | 331.2 | 40 | 8.99 | ES- | 2 |
| 321 | PG 16:0-22:5 | 795.5 | 30 | 255.3 | 40 | 8.99 | ES- | 1 |
| 322 | PG 16:0-22:5 | 795.5 | 30 | 329.2 | 40 | 8.99 | ES- | 2 |
| 323 | PG 16:0-22:6 | 793.5 | 30 | 255.3 | 40 | 8.99 | ES- | 1 |
| 324 | PG 16:0-22:6 | 793.5 | 30 | 327.2 | 40 | 8.99 | ES- | 2 |
| 325 | PG 16:1-16:1 | 717.5 | 30 | 253.3 | 40 | 8.99 | ES- | 1 |
| 326 | PG 16:1-18:0 | 747.5 | 30 | 253.3 | 40 | 8.99 | ES- | 1 |
| 327 | PG 16:1-18:0 | 747.5 | 30 | 283.3 | 40 | 8.99 | ES- | 2 |
| 328 | PG 16:1-18:1 | 745.5 | 30 | 253.3 | 40 | 8.99 | ES- | 1 |

|     |              |       |    |       |    |      |     |   |
|-----|--------------|-------|----|-------|----|------|-----|---|
| 329 | PG 16:1-18:1 | 745.5 | 30 | 281.3 | 40 | 8.99 | ES- | 2 |
| 330 | PG 16:1-18:2 | 743.5 | 30 | 253.3 | 40 | 8.99 | ES- | 1 |
| 331 | PG 16:1-18:2 | 743.5 | 30 | 279.3 | 40 | 8.99 | ES- | 2 |
| 332 | PG 16:1-18:3 | 741.5 | 30 | 253.3 | 40 | 8.99 | ES- | 1 |
| 333 | PG 16:1-18:3 | 741.5 | 30 | 277.3 | 40 | 8.99 | ES- | 2 |
| 334 | PG 16:1-18:4 | 739.5 | 30 | 253.3 | 40 | 8.99 | ES- | 1 |
| 335 | PG 16:1-18:4 | 739.5 | 30 | 275.3 | 40 | 8.99 | ES- | 2 |
| 336 | PG 16:1-20:0 | 775.5 | 30 | 253.3 | 40 | 8.99 | ES- | 1 |
| 337 | PG 16:1-20:0 | 775.5 | 30 | 311.2 | 40 | 8.99 | ES- | 2 |
| 338 | PG 16:1-20:1 | 773.5 | 30 | 253.3 | 40 | 8.99 | ES- | 1 |
| 339 | PG 16:1-20:1 | 773.5 | 30 | 309.2 | 40 | 8.99 | ES- | 2 |
| 340 | PG 16:1-20:2 | 771.5 | 30 | 253.3 | 40 | 8.99 | ES- | 1 |
| 341 | PG 16:1-20:2 | 771.5 | 30 | 307.2 | 40 | 8.99 | ES- | 2 |
| 342 | PG 16:1-20:3 | 769.5 | 30 | 253.3 | 40 | 8.99 | ES- | 1 |
| 343 | PG 16:1-20:3 | 769.5 | 30 | 305.2 | 40 | 8.99 | ES- | 2 |
| 344 | PG 16:1-20:4 | 767.5 | 30 | 253.3 | 40 | 8.99 | ES- | 1 |
| 345 | PG 16:1-20:4 | 767.5 | 30 | 303.2 | 40 | 8.99 | ES- | 2 |
| 346 | PG 16:1-20:5 | 765.5 | 30 | 253.3 | 40 | 8.99 | ES- | 1 |
| 347 | PG 16:1-20:5 | 765.5 | 30 | 301.2 | 40 | 8.99 | ES- | 2 |
| 348 | PG 16:1-22:0 | 803.6 | 30 | 253.3 | 40 | 8.99 | ES- | 1 |
| 349 | PG 16:1-22:0 | 803.6 | 30 | 339.2 | 40 | 8.99 | ES- | 2 |
| 350 | PG 16:1-22:1 | 801.6 | 30 | 253.3 | 40 | 8.99 | ES- | 1 |
| 351 | PG 16:1-22:1 | 801.6 | 30 | 337.2 | 40 | 8.99 | ES- | 2 |
| 352 | PG 16:1-22:2 | 799.5 | 30 | 253.3 | 40 | 8.99 | ES- | 1 |
| 353 | PG 16:1-22:2 | 799.5 | 30 | 335.2 | 40 | 8.99 | ES- | 2 |
| 354 | PG 16:1-22:3 | 797.5 | 30 | 253.3 | 40 | 8.99 | ES- | 1 |
| 355 | PG 16:1-22:3 | 797.5 | 30 | 333.2 | 40 | 8.99 | ES- | 2 |
| 356 | PG 16:1-22:4 | 795.5 | 30 | 253.3 | 40 | 8.99 | ES- | 1 |
| 357 | PG 16:1-22:4 | 795.5 | 30 | 331.2 | 40 | 8.99 | ES- | 2 |
| 358 | PG 16:1-22:5 | 793.5 | 30 | 253.3 | 40 | 8.99 | ES- | 1 |
| 359 | PG 16:1-22:5 | 793.5 | 30 | 329.2 | 40 | 8.99 | ES- | 2 |
| 360 | PG 16:1-22:6 | 791.5 | 30 | 253.3 | 40 | 8.99 | ES- | 1 |
| 361 | PG 16:1-22:6 | 791.5 | 30 | 327.2 | 40 | 8.99 | ES- | 2 |
| 362 | PG 17:0-17:0 | 749.5 | 30 | 269.3 | 40 | 8.99 | ES- | 1 |
| 363 | PG 18:0-18:0 | 777.6 | 30 | 283.3 | 40 | 8.99 | ES- | 1 |



|     |              |       |    |       |    |      |     |   |
|-----|--------------|-------|----|-------|----|------|-----|---|
| 364 | PG 18:0-18:1 | 775.5 | 30 | 281.3 | 40 | 8.99 | ES- | 1 |
| 365 | PG 18:0-18:1 | 775.5 | 30 | 283.3 | 40 | 8.99 | ES- | 2 |
| 366 | PG 18:0-18:2 | 773.5 | 30 | 279.3 | 40 | 8.99 | ES- | 1 |
| 367 | PG 18:0-18:2 | 773.5 | 30 | 283.3 | 40 | 8.99 | ES- | 2 |
| 368 | PG 18:0-18:3 | 771.5 | 30 | 277.3 | 40 | 8.99 | ES- | 1 |
| 369 | PG 18:0-18:3 | 771.5 | 30 | 283.3 | 40 | 8.99 | ES- | 2 |
| 370 | PG 18:0-18:4 | 769.5 | 30 | 275.3 | 40 | 8.99 | ES- | 1 |
| 371 | PG 18:0-18:4 | 769.5 | 30 | 283.3 | 40 | 8.99 | ES- | 2 |
| 372 | PG 18:0-20:0 | 805.6 | 30 | 283.3 | 40 | 8.99 | ES- | 1 |
| 373 | PG 18:0-20:0 | 805.6 | 30 | 311.2 | 40 | 8.99 | ES- | 2 |
| 374 | PG 18:0-20:1 | 803.6 | 30 | 283.3 | 40 | 8.99 | ES- | 1 |
| 375 | PG 18:0-20:1 | 803.6 | 30 | 309.2 | 40 | 8.99 | ES- | 2 |
| 376 | PG 18:0-20:2 | 801.6 | 30 | 283.3 | 40 | 8.99 | ES- | 1 |
| 377 | PG 18:0-20:2 | 801.6 | 30 | 307.2 | 40 | 8.99 | ES- | 2 |
| 378 | PG 18:0-20:3 | 799.5 | 30 | 283.3 | 40 | 8.99 | ES- | 1 |
| 379 | PG 18:0-20:3 | 799.5 | 30 | 305.2 | 40 | 8.99 | ES- | 2 |
| 380 | PG 18:0-20:4 | 797.5 | 30 | 283.3 | 40 | 8.99 | ES- | 1 |
| 381 | PG 18:0-20:4 | 797.5 | 30 | 303.2 | 40 | 8.99 | ES- | 2 |
| 382 | PG 18:0-20:5 | 795.5 | 30 | 283.3 | 40 | 8.99 | ES- | 1 |
| 383 | PG 18:0-20:5 | 795.5 | 30 | 301.2 | 40 | 8.99 | ES- | 2 |
| 384 | PG 18:0-22:0 | 833.6 | 30 | 283.3 | 40 | 8.99 | ES- | 1 |
| 385 | PG 18:0-22:0 | 833.6 | 30 | 339.2 | 40 | 8.99 | ES- | 2 |
| 386 | PG 18:0-22:1 | 831.6 | 30 | 283.3 | 40 | 8.99 | ES- | 1 |
| 387 | PG 18:0-22:1 | 831.6 | 30 | 337.2 | 40 | 8.99 | ES- | 2 |
| 388 | PG 18:0-22:2 | 829.6 | 30 | 283.3 | 40 | 8.99 | ES- | 1 |
| 389 | PG 18:0-22:2 | 829.6 | 30 | 335.2 | 40 | 8.99 | ES- | 2 |
| 390 | PG 18:0-22:3 | 827.6 | 30 | 283.3 | 40 | 8.99 | ES- | 1 |
| 391 | PG 18:0-22:3 | 827.6 | 30 | 333.2 | 40 | 8.99 | ES- | 2 |
| 392 | PG 18:0-22:4 | 825.6 | 30 | 283.3 | 40 | 8.99 | ES- | 1 |
| 393 | PG 18:0-22:4 | 825.6 | 30 | 331.2 | 40 | 8.99 | ES- | 2 |
| 394 | PG 18:0-22:5 | 823.5 | 30 | 283.3 | 40 | 8.99 | ES- | 1 |
| 395 | PG 18:0-22:5 | 823.5 | 30 | 329.2 | 40 | 8.99 | ES- | 2 |
| 396 | PG 18:0-22:6 | 821.5 | 30 | 283.3 | 40 | 8.99 | ES- | 1 |
| 397 | PG 18:0-22:6 | 821.5 | 30 | 327.2 | 40 | 8.99 | ES- | 2 |
| 398 | PG 18:1-18:1 | 773.5 | 30 | 281.3 | 40 | 8.99 | ES- | 1 |

|     |              |       |    |       |    |      |     |   |
|-----|--------------|-------|----|-------|----|------|-----|---|
| 399 | PG 18:1-18:2 | 771.5 | 30 | 279.3 | 40 | 8.99 | ES- | 1 |
| 400 | PG 18:1-18:2 | 771.5 | 30 | 281.3 | 40 | 8.99 | ES- | 2 |
| 401 | PG 18:1-18:3 | 769.5 | 30 | 277.3 | 40 | 8.99 | ES- | 1 |
| 402 | PG 18:1-18:3 | 769.5 | 30 | 281.3 | 40 | 8.99 | ES- | 2 |
| 403 | PG 18:1-18:4 | 767.5 | 30 | 275.3 | 40 | 8.99 | ES- | 1 |
| 404 | PG 18:1-18:4 | 767.5 | 30 | 281.3 | 40 | 8.99 | ES- | 2 |
| 405 | PG 18:1-20:0 | 803.6 | 30 | 281.3 | 40 | 8.99 | ES- | 1 |
| 406 | PG 18:1-20:0 | 803.6 | 30 | 311.2 | 40 | 8.99 | ES- | 2 |
| 407 | PG 18:1-20:1 | 801.6 | 30 | 281.3 | 40 | 8.99 | ES- | 1 |
| 408 | PG 18:1-20:1 | 801.6 | 30 | 309.2 | 40 | 8.99 | ES- | 2 |
| 409 | PG 18:1-20:2 | 799.5 | 30 | 281.3 | 40 | 8.99 | ES- | 1 |
| 410 | PG 18:1-20:2 | 799.5 | 30 | 307.2 | 40 | 8.99 | ES- | 2 |
| 411 | PG 18:1-20:3 | 797.5 | 30 | 281.3 | 40 | 8.99 | ES- | 1 |
| 412 | PG 18:1-20:3 | 797.5 | 30 | 305.2 | 40 | 8.99 | ES- | 2 |
| 413 | PG 18:1-20:4 | 795.5 | 30 | 281.3 | 40 | 8.99 | ES- | 1 |
| 414 | PG 18:1-20:4 | 795.5 | 30 | 303.2 | 40 | 8.99 | ES- | 2 |
| 415 | PG 18:1-20:5 | 793.5 | 30 | 281.3 | 40 | 8.99 | ES- | 1 |
| 416 | PG 18:1-20:5 | 793.5 | 30 | 301.2 | 40 | 8.99 | ES- | 2 |
| 417 | PG 18:1-22:0 | 831.6 | 30 | 281.3 | 40 | 8.99 | ES- | 1 |
| 418 | PG 18:1-22:0 | 831.6 | 30 | 339.2 | 40 | 8.99 | ES- | 2 |
| 419 | PG 18:1-22:1 | 829.6 | 30 | 281.3 | 40 | 8.99 | ES- | 1 |
| 420 | PG 18:1-22:1 | 829.6 | 30 | 337.2 | 40 | 8.99 | ES- | 2 |
| 421 | PG 18:1-22:2 | 827.6 | 30 | 281.3 | 40 | 8.99 | ES- | 1 |
| 422 | PG 18:1-22:2 | 827.6 | 30 | 335.2 | 40 | 8.99 | ES- | 2 |
| 423 | PG 18:1-22:3 | 825.6 | 30 | 281.3 | 40 | 8.99 | ES- | 1 |
| 424 | PG 18:1-22:3 | 825.6 | 30 | 333.2 | 40 | 8.99 | ES- | 2 |
| 425 | PG 18:1-22:4 | 823.5 | 30 | 281.3 | 40 | 8.99 | ES- | 1 |
| 426 | PG 18:1-22:4 | 823.5 | 30 | 331.2 | 40 | 8.99 | ES- | 2 |
| 427 | PG 18:1-22:5 | 821.5 | 30 | 281.3 | 40 | 8.99 | ES- | 1 |
| 428 | PG 18:1-22:5 | 821.5 | 30 | 329.2 | 40 | 8.99 | ES- | 2 |
| 429 | PG 18:1-22:6 | 819.5 | 30 | 281.3 | 40 | 8.99 | ES- | 1 |
| 430 | PG 18:1-22:6 | 819.5 | 30 | 327.2 | 40 | 8.99 | ES- | 2 |
| 431 | PG 18:2-18:2 | 769.5 | 30 | 279.3 | 40 | 8.99 | ES- | 1 |
| 432 | PG 18:2-18:3 | 767.5 | 30 | 277.3 | 40 | 8.99 | ES- | 1 |
| 433 | PG 18:2-18:3 | 767.5 | 30 | 279.3 | 40 | 8.99 | ES- | 2 |

|     |              |       |    |       |    |       |     |   |
|-----|--------------|-------|----|-------|----|-------|-----|---|
| 434 | PG 18:2-18:4 | 765.5 | 30 | 275.3 | 40 | 8.99  | ES- | 1 |
| 435 | PG 18:2-18:4 | 765.5 | 30 | 279.3 | 40 | 8.99  | ES- | 2 |
| 436 | PG 18:2-20:0 | 801.6 | 30 | 279.3 | 40 | 8.99  | ES- | 1 |
| 437 | PG 18:2-20:0 | 801.6 | 30 | 311.2 | 40 | 8.99  | ES- | 2 |
| 438 | PG 18:2-20:1 | 799.5 | 30 | 279.3 | 40 | 8.99  | ES- | 1 |
| 439 | PG 18:2-20:1 | 799.5 | 30 | 309.2 | 40 | 8.99  | ES- | 2 |
| 440 | PG 18:2-20:2 | 797.5 | 30 | 279.3 | 40 | 8.99  | ES- | 1 |
| 441 | PG 18:2-20:2 | 797.5 | 30 | 307.2 | 40 | 8.99  | ES- | 2 |
| 442 | PG 18:2-20:3 | 795.5 | 30 | 279.3 | 40 | 8.99  | ES- | 1 |
| 443 | PG 18:2-20:3 | 795.5 | 30 | 305.2 | 40 | 8.99  | ES- | 2 |
| 444 | PG 18:2-20:4 | 793.5 | 30 | 279.3 | 40 | 8.99  | ES- | 1 |
| 445 | PG 18:2-20:4 | 793.5 | 30 | 303.2 | 40 | 8.99  | ES- | 2 |
| 446 | PG 18:2-20:5 | 791.5 | 30 | 279.3 | 40 | 8.99  | ES- | 1 |
| 447 | PG 18:2-20:5 | 791.5 | 30 | 301.2 | 40 | 8.99  | ES- | 2 |
| 448 | PS 16:0-20:0 | 790.6 | 30 | 255.3 | 50 | 12.23 | ES- | 1 |
| 449 | PS 16:0-20:0 | 790.6 | 30 | 311.2 | 50 | 12.23 | ES- | 2 |
| 450 | PS 16:0-20:1 | 788.5 | 30 | 255.3 | 50 | 12.23 | ES- | 1 |
| 451 | PS 16:0-20:1 | 788.5 | 30 | 309.2 | 50 | 12.23 | ES- | 2 |
| 452 | PS 16:0-20:2 | 786.5 | 30 | 255.3 | 50 | 12.23 | ES- | 1 |
| 453 | PS 16:0-20:2 | 786.5 | 30 | 307.2 | 50 | 12.23 | ES- | 2 |
| 454 | PS 16:0-20:3 | 784.5 | 30 | 255.3 | 50 | 12.23 | ES- | 1 |
| 455 | PS 16:0-20:3 | 784.5 | 30 | 305.2 | 50 | 12.23 | ES- | 2 |
| 456 | PS 16:0-20:4 | 782.5 | 30 | 255.3 | 50 | 12.23 | ES- | 1 |
| 457 | PS 16:0-20:4 | 782.5 | 30 | 303.2 | 50 | 12.23 | ES- | 2 |
| 458 | PS 16:0-20:5 | 780.5 | 30 | 255.3 | 50 | 12.23 | ES- | 1 |
| 459 | PS 16:0-20:5 | 780.5 | 30 | 301.2 | 50 | 12.23 | ES- | 2 |
| 460 | PS 16:0-22:0 | 818.6 | 30 | 255.3 | 50 | 12.23 | ES- | 1 |
| 461 | PS 16:0-22:0 | 818.6 | 30 | 339.2 | 50 | 12.23 | ES- | 2 |
| 462 | PS 16:0-22:1 | 816.6 | 30 | 255.3 | 50 | 12.23 | ES- | 1 |
| 463 | PS 16:0-22:1 | 816.6 | 30 | 337.2 | 50 | 12.23 | ES- | 2 |
| 464 | PS 16:0-22:2 | 814.6 | 30 | 255.3 | 50 | 12.23 | ES- | 1 |
| 465 | PS 16:0-22:2 | 814.6 | 30 | 335.2 | 50 | 12.23 | ES- | 2 |
| 466 | PS 16:0-22:3 | 812.5 | 30 | 255.3 | 50 | 12.23 | ES- | 1 |
| 467 | PS 16:0-22:3 | 812.5 | 30 | 333.2 | 50 | 12.23 | ES- | 2 |
| 468 | PS 16:0-22:4 | 810.5 | 30 | 255.3 | 50 | 12.23 | ES- | 1 |

|     |              |       |    |       |    |       |     |   |
|-----|--------------|-------|----|-------|----|-------|-----|---|
| 469 | PS 16:0-22:4 | 810.5 | 30 | 331.2 | 50 | 12.23 | ES- | 2 |
| 470 | PS 16:0-22:5 | 808.5 | 30 | 255.3 | 50 | 12.23 | ES- | 1 |
| 471 | PS 16:0-22:5 | 808.5 | 30 | 329.2 | 50 | 12.23 | ES- | 2 |
| 472 | PS 16:0-22:6 | 806.5 | 30 | 255.3 | 50 | 12.23 | ES- | 1 |
| 473 | PS 16:0-22:6 | 806.5 | 30 | 327.2 | 50 | 12.23 | ES- | 2 |
| 474 | PS 16:1-16:1 | 730.5 | 30 | 253.3 | 50 | 12.23 | ES- | 1 |
| 475 | PS 16:1-18:0 | 760.5 | 30 | 253.3 | 50 | 12.23 | ES- | 1 |
| 476 | PS 16:1-18:0 | 760.5 | 30 | 283.3 | 50 | 12.23 | ES- | 2 |
| 477 | PS 16:1-18:1 | 758.5 | 30 | 253.3 | 50 | 12.23 | ES- | 1 |
| 478 | PS 16:1-18:1 | 758.5 | 30 | 281.3 | 50 | 12.23 | ES- | 2 |
| 479 | PS 16:1-18:2 | 756.5 | 30 | 253.3 | 50 | 12.23 | ES- | 1 |
| 480 | PS 16:1-18:2 | 756.5 | 30 | 279.3 | 50 | 12.23 | ES- | 2 |
| 481 | PS 16:1-18:3 | 754.5 | 30 | 253.3 | 50 | 12.23 | ES- | 1 |
| 482 | PS 16:1-18:3 | 754.5 | 30 | 277.3 | 50 | 12.23 | ES- | 2 |
| 483 | PS 16:1-18:4 | 752.5 | 30 | 253.3 | 50 | 12.23 | ES- | 1 |
| 484 | PS 16:1-18:4 | 752.5 | 30 | 275.3 | 50 | 12.23 | ES- | 2 |
| 485 | PS 16:1-20:0 | 788.5 | 30 | 253.3 | 50 | 12.23 | ES- | 1 |
| 486 | PS 16:1-20:0 | 788.5 | 30 | 311.2 | 50 | 12.23 | ES- | 2 |
| 487 | PS 16:1-20:1 | 786.5 | 30 | 253.3 | 50 | 12.23 | ES- | 1 |
| 488 | PS 16:1-20:1 | 786.5 | 30 | 309.2 | 50 | 12.23 | ES- | 2 |
| 489 | PS 16:1-20:2 | 784.5 | 30 | 253.3 | 50 | 12.23 | ES- | 1 |
| 490 | PS 16:1-20:2 | 784.5 | 30 | 307.2 | 50 | 12.23 | ES- | 2 |
| 491 | PS 16:1-20:3 | 782.5 | 30 | 253.3 | 50 | 12.23 | ES- | 1 |
| 492 | PS 16:1-20:3 | 782.5 | 30 | 305.2 | 50 | 12.23 | ES- | 2 |
| 493 | PS 16:1-20:4 | 780.5 | 30 | 253.3 | 50 | 12.23 | ES- | 1 |
| 494 | PS 16:1-20:4 | 780.5 | 30 | 303.2 | 50 | 12.23 | ES- | 2 |
| 495 | PS 16:1-20:5 | 778.5 | 30 | 253.3 | 50 | 12.23 | ES- | 1 |
| 496 | PS 16:1-20:5 | 778.5 | 30 | 301.2 | 50 | 12.23 | ES- | 2 |
| 497 | PS 16:1-22:0 | 816.6 | 30 | 253.3 | 50 | 12.23 | ES- | 1 |
| 498 | PS 16:1-22:0 | 816.6 | 30 | 339.2 | 50 | 12.23 | ES- | 2 |
| 499 | PS 16:1-22:1 | 814.6 | 30 | 253.3 | 50 | 12.23 | ES- | 1 |
| 500 | PS 16:1-22:1 | 814.6 | 30 | 337.2 | 50 | 12.23 | ES- | 2 |
| 501 | PS 16:1-22:2 | 812.5 | 30 | 253.3 | 50 | 12.23 | ES- | 1 |
| 502 | PS 16:1-22:2 | 812.5 | 30 | 335.2 | 50 | 12.23 | ES- | 2 |
| 503 | PS 16:1-22:3 | 810.5 | 30 | 253.3 | 50 | 12.23 | ES- | 1 |

|     |              |       |    |       |    |       |     |   |
|-----|--------------|-------|----|-------|----|-------|-----|---|
| 504 | PS 16:1-22:3 | 810.5 | 30 | 333.2 | 50 | 12.23 | ES- | 2 |
| 505 | PS 16:1-22:4 | 808.5 | 30 | 253.3 | 50 | 12.23 | ES- | 1 |
| 506 | PS 16:1-22:4 | 808.5 | 30 | 331.2 | 50 | 12.23 | ES- | 2 |
| 507 | PS 16:1-22:5 | 806.5 | 30 | 253.3 | 50 | 12.23 | ES- | 1 |
| 508 | PS 16:1-22:5 | 806.5 | 30 | 329.2 | 50 | 12.23 | ES- | 2 |
| 509 | PS 16:1-22:6 | 804.5 | 30 | 253.3 | 50 | 12.23 | ES- | 1 |
| 510 | PS 16:1-22:6 | 804.5 | 30 | 327.2 | 50 | 12.23 | ES- | 2 |
| 511 | PS 17:0-17:0 | 762.5 | 30 | 269.3 | 50 | 12.23 | ES- | 1 |
| 512 | PS 18:0-18:0 | 790.6 | 30 | 283.3 | 50 | 12.23 | ES- | 1 |
| 513 | PS 18:0-18:1 | 788.5 | 30 | 281.3 | 50 | 12.23 | ES- | 1 |
| 514 | PS 18:0-18:1 | 788.5 | 30 | 283.3 | 50 | 12.23 | ES- | 2 |
| 515 | PS 18:0-18:2 | 786.5 | 30 | 279.3 | 50 | 12.23 | ES- | 1 |
| 516 | PS 18:0-18:2 | 786.5 | 30 | 283.3 | 50 | 12.23 | ES- | 2 |
| 517 | PS 18:0-18:3 | 784.5 | 30 | 277.3 | 50 | 12.23 | ES- | 1 |
| 518 | PS 18:0-18:3 | 784.5 | 30 | 283.3 | 50 | 12.23 | ES- | 2 |
| 519 | PS 18:0-18:4 | 782.5 | 30 | 275.3 | 50 | 12.23 | ES- | 1 |
| 520 | PS 18:0-18:4 | 782.5 | 30 | 283.3 | 50 | 12.23 | ES- | 2 |
| 521 | PS 18:0-20:0 | 818.6 | 30 | 283.3 | 50 | 12.23 | ES- | 1 |
| 522 | PS 18:0-20:0 | 818.6 | 30 | 311.2 | 50 | 12.23 | ES- | 2 |
| 523 | PS 18:0-20:1 | 816.6 | 30 | 283.3 | 50 | 12.23 | ES- | 1 |
| 524 | PS 18:0-20:1 | 816.6 | 30 | 309.2 | 50 | 12.23 | ES- | 2 |
| 525 | PS 18:0-20:2 | 814.6 | 30 | 283.3 | 50 | 12.23 | ES- | 1 |
| 526 | PS 18:0-20:2 | 814.6 | 30 | 307.2 | 50 | 12.23 | ES- | 2 |
| 527 | PS 18:0-20:3 | 812.5 | 30 | 283.3 | 50 | 12.23 | ES- | 1 |
| 528 | PS 18:0-20:3 | 812.5 | 30 | 305.2 | 50 | 12.23 | ES- | 2 |
| 529 | PS 18:0-20:4 | 810.5 | 30 | 283.3 | 50 | 12.23 | ES- | 1 |
| 530 | PS 18:0-20:4 | 810.5 | 30 | 303.2 | 50 | 12.23 | ES- | 2 |
| 531 | PS 18:0-20:5 | 808.5 | 30 | 283.3 | 50 | 12.23 | ES- | 1 |
| 532 | PS 18:0-20:5 | 808.5 | 30 | 301.2 | 50 | 12.23 | ES- | 2 |
| 533 | PS 18:0-22:0 | 846.6 | 30 | 283.3 | 50 | 12.23 | ES- | 1 |
| 534 | PS 18:0-22:0 | 846.6 | 30 | 339.2 | 50 | 12.23 | ES- | 2 |
| 535 | PS 18:0-22:1 | 844.6 | 30 | 283.3 | 50 | 12.23 | ES- | 1 |
| 536 | PS 18:0-22:1 | 844.6 | 30 | 337.2 | 50 | 12.23 | ES- | 2 |
| 537 | PS 18:0-22:2 | 842.6 | 30 | 283.3 | 50 | 12.23 | ES- | 1 |
| 538 | PS 18:0-22:2 | 842.6 | 30 | 335.2 | 50 | 12.23 | ES- | 2 |

|     |              |       |    |       |    |       |     |   |
|-----|--------------|-------|----|-------|----|-------|-----|---|
| 539 | PS 18:0-22:3 | 840.6 | 30 | 283.3 | 50 | 12.23 | ES- | 1 |
| 540 | PS 18:0-22:3 | 840.6 | 30 | 333.2 | 50 | 12.23 | ES- | 2 |
| 541 | PS 18:0-22:4 | 838.6 | 30 | 283.3 | 50 | 12.23 | ES- | 1 |
| 542 | PS 18:0-22:4 | 838.6 | 30 | 331.2 | 50 | 12.23 | ES- | 2 |
| 543 | PS 18:0-22:5 | 836.5 | 30 | 283.3 | 50 | 12.23 | ES- | 1 |
| 544 | PS 18:0-22:5 | 836.5 | 30 | 329.2 | 50 | 12.23 | ES- | 2 |
| 545 | PS 18:0-22:6 | 834.5 | 30 | 283.3 | 50 | 12.23 | ES- | 1 |
| 546 | PS 18:0-22:6 | 834.5 | 30 | 327.2 | 50 | 12.23 | ES- | 2 |
| 547 | PS 18:1-18:1 | 786.5 | 30 | 281.3 | 50 | 12.23 | ES- | 1 |
| 548 | PS 18:1-18:2 | 784.5 | 30 | 279.3 | 50 | 12.23 | ES- | 1 |
| 549 | PS 18:1-18:2 | 784.5 | 30 | 281.3 | 50 | 12.23 | ES- | 2 |
| 550 | PS 18:1-18:3 | 782.5 | 30 | 277.3 | 50 | 12.23 | ES- | 1 |
| 551 | PS 18:1-18:3 | 782.5 | 30 | 281.3 | 50 | 12.23 | ES- | 2 |
| 552 | PS 18:1-18:4 | 780.5 | 30 | 275.3 | 50 | 12.23 | ES- | 1 |
| 553 | PS 18:1-18:4 | 780.5 | 30 | 281.3 | 50 | 12.23 | ES- | 2 |
| 554 | PS 18:1-20:0 | 816.6 | 30 | 281.3 | 50 | 12.23 | ES- | 1 |
| 555 | PS 18:1-20:0 | 816.6 | 30 | 311.2 | 50 | 12.23 | ES- | 2 |
| 556 | PS 18:1-20:1 | 814.6 | 30 | 281.3 | 50 | 12.23 | ES- | 1 |
| 557 | PS 18:1-20:1 | 814.6 | 30 | 309.2 | 50 | 12.23 | ES- | 2 |
| 558 | PS 18:1-20:2 | 812.5 | 30 | 281.3 | 50 | 12.23 | ES- | 1 |
| 559 | PS 18:1-20:2 | 812.5 | 30 | 307.2 | 50 | 12.23 | ES- | 2 |
| 560 | PS 18:1-20:3 | 810.5 | 30 | 281.3 | 50 | 12.23 | ES- | 1 |
| 561 | PS 18:1-20:3 | 810.5 | 30 | 305.2 | 50 | 12.23 | ES- | 2 |
| 562 | PS 18:1-20:4 | 808.5 | 30 | 281.3 | 50 | 12.23 | ES- | 1 |
| 563 | PS 18:1-20:4 | 808.5 | 30 | 303.2 | 50 | 12.23 | ES- | 2 |
| 564 | PS 18:1-20:5 | 806.5 | 30 | 281.3 | 50 | 12.23 | ES- | 1 |
| 565 | PS 18:1-20:5 | 806.5 | 30 | 301.2 | 50 | 12.23 | ES- | 2 |
| 566 | PS 18:1-22:0 | 844.6 | 30 | 281.3 | 50 | 12.23 | ES- | 1 |
| 567 | PS 18:1-22:0 | 844.6 | 30 | 339.2 | 50 | 12.23 | ES- | 2 |
| 568 | PS 18:1-22:1 | 842.6 | 30 | 281.3 | 50 | 12.23 | ES- | 1 |
| 569 | PS 18:1-22:1 | 842.6 | 30 | 337.2 | 50 | 12.23 | ES- | 2 |
| 570 | PS 18:1-22:2 | 840.6 | 30 | 281.3 | 50 | 12.23 | ES- | 1 |
| 571 | PS 18:1-22:2 | 840.6 | 30 | 335.2 | 50 | 12.23 | ES- | 2 |
| 572 | PS 18:1-22:3 | 838.6 | 30 | 281.3 | 50 | 12.23 | ES- | 1 |
| 573 | PS 18:1-22:3 | 838.6 | 30 | 333.2 | 50 | 12.23 | ES- | 2 |

|     |              |       |    |       |    |       |     |   |
|-----|--------------|-------|----|-------|----|-------|-----|---|
| 574 | PS 18:1-22:4 | 836.5 | 30 | 281.3 | 50 | 12.23 | ES- | 1 |
| 575 | PS 18:1-22:4 | 836.5 | 30 | 331.2 | 50 | 12.23 | ES- | 2 |
| 576 | PS 18:1-22:5 | 834.5 | 30 | 281.3 | 50 | 12.23 | ES- | 1 |
| 577 | PS 18:1-22:5 | 834.5 | 30 | 329.2 | 50 | 12.23 | ES- | 2 |
| 578 | PS 18:1-22:6 | 832.5 | 30 | 281.3 | 50 | 12.23 | ES- | 1 |
| 579 | PS 18:1-22:6 | 832.5 | 30 | 327.2 | 50 | 12.23 | ES- | 2 |
| 580 | PS 18:2-18:2 | 782.5 | 30 | 279.3 | 50 | 12.23 | ES- | 1 |
| 581 | PS 18:2-18:3 | 780.5 | 30 | 277.3 | 50 | 12.23 | ES- | 1 |
| 582 | PS 18:2-18:3 | 780.5 | 30 | 279.3 | 50 | 12.23 | ES- | 2 |
| 583 | PS 18:2-18:4 | 778.5 | 30 | 275.3 | 50 | 12.23 | ES- | 1 |
| 584 | PS 18:2-18:4 | 778.5 | 30 | 279.3 | 50 | 12.23 | ES- | 2 |
| 585 | PS 18:2-20:0 | 814.6 | 30 | 279.3 | 50 | 12.23 | ES- | 1 |
| 586 | PS 18:2-20:0 | 814.6 | 30 | 311.2 | 50 | 12.23 | ES- | 2 |
| 587 | PS 18:2-20:1 | 812.5 | 30 | 279.3 | 50 | 12.23 | ES- | 1 |
| 588 | PS 18:2-20:1 | 812.5 | 30 | 309.2 | 50 | 12.23 | ES- | 2 |
| 589 | PS 18:2-20:2 | 810.5 | 30 | 279.3 | 50 | 12.23 | ES- | 1 |
| 590 | PS 18:2-20:2 | 810.5 | 30 | 307.2 | 50 | 12.23 | ES- | 2 |
| 591 | PS 18:2-20:3 | 808.5 | 30 | 279.3 | 50 | 12.23 | ES- | 1 |
| 592 | PS 18:2-20:3 | 808.5 | 30 | 305.2 | 50 | 12.23 | ES- | 2 |
| 593 | PS 18:2-20:4 | 806.5 | 30 | 279.3 | 50 | 12.23 | ES- | 1 |
| 594 | PS 18:2-20:4 | 806.5 | 30 | 303.2 | 50 | 12.23 | ES- | 2 |
| 595 | PS 18:2-20:5 | 804.5 | 30 | 279.3 | 50 | 12.23 | ES- | 1 |
| 596 | PS 18:2-20:5 | 804.5 | 30 | 301.2 | 50 | 12.23 | ES- | 2 |

Method 11: PC, PE, PG, and PS (3)

| No | Name         | Precursor | CV (V) | Product | CE (V) | RT setting (min) | IonMode | Ion |
|----|--------------|-----------|--------|---------|--------|------------------|---------|-----|
| 1  | PC 18:2-22:0 | 900.7     | 15     | 279.3   | 40     | 5.46             | ES-     | 1   |
| 2  | PC 18:2-22:0 | 900.7     | 15     | 339.2   | 40     | 5.46             | ES-     | 2   |
| 3  | PC 18:2-22:1 | 898.7     | 15     | 279.3   | 40     | 5.46             | ES-     | 1   |
| 4  | PC 18:2-22:1 | 898.7     | 15     | 337.2   | 40     | 5.46             | ES-     | 2   |
| 5  | PC 18:2-22:2 | 896.6     | 15     | 279.3   | 40     | 5.46             | ES-     | 1   |
| 6  | PC 18:2-22:2 | 896.6     | 15     | 335.2   | 40     | 5.46             | ES-     | 2   |
| 7  | PC 18:2-22:3 | 894.6     | 15     | 279.3   | 40     | 5.46             | ES-     | 1   |
| 8  | PC 18:2-22:3 | 894.6     | 15     | 333.2   | 40     | 5.46             | ES-     | 2   |
| 9  | PC 18:2-22:4 | 892.6     | 15     | 279.3   | 40     | 5.46             | ES-     | 1   |
| 10 | PC 18:2-22:4 | 892.6     | 15     | 331.2   | 40     | 5.46             | ES-     | 2   |

|    |              |       |    |       |    |      |     |   |
|----|--------------|-------|----|-------|----|------|-----|---|
| 11 | PC 18:2-22:5 | 890.6 | 15 | 279.3 | 40 | 5.46 | ES- | 1 |
| 12 | PC 18:2-22:5 | 890.6 | 15 | 329.2 | 40 | 5.46 | ES- | 2 |
| 13 | PC 18:2-22:6 | 888.6 | 15 | 279.3 | 40 | 5.46 | ES- | 1 |
| 14 | PC 18:2-22:6 | 888.6 | 15 | 327.2 | 40 | 5.46 | ES- | 2 |
| 15 | PC 18:3-18:3 | 836.5 | 15 | 277.3 | 40 | 5.46 | ES- | 1 |
| 16 | PC 18:3-18:4 | 834.5 | 15 | 275.3 | 40 | 5.46 | ES- | 1 |
| 17 | PC 18:3-18:4 | 834.5 | 15 | 277.3 | 40 | 5.46 | ES- | 2 |
| 18 | PC 18:3-20:0 | 870.6 | 15 | 277.3 | 40 | 5.46 | ES- | 1 |
| 19 | PC 18:3-20:0 | 870.6 | 15 | 311.2 | 40 | 5.46 | ES- | 2 |
| 20 | PC 18:3-20:1 | 868.6 | 15 | 277.3 | 40 | 5.46 | ES- | 1 |
| 21 | PC 18:3-20:1 | 868.6 | 15 | 309.2 | 40 | 5.46 | ES- | 2 |
| 22 | PC 18:3-20:2 | 866.6 | 15 | 277.3 | 40 | 5.46 | ES- | 1 |
| 23 | PC 18:3-20:2 | 866.6 | 15 | 307.2 | 40 | 5.46 | ES- | 2 |
| 24 | PC 18:3-20:3 | 864.6 | 15 | 277.3 | 40 | 5.46 | ES- | 1 |
| 25 | PC 18:3-20:3 | 864.6 | 15 | 305.2 | 40 | 5.46 | ES- | 2 |
| 26 | PC 18:3-20:4 | 862.6 | 15 | 277.3 | 40 | 5.46 | ES- | 1 |
| 27 | PC 18:3-20:4 | 862.6 | 15 | 303.2 | 40 | 5.46 | ES- | 2 |
| 28 | PC 18:3-20:5 | 860.5 | 15 | 277.3 | 40 | 5.46 | ES- | 1 |
| 29 | PC 18:3-20:5 | 860.5 | 15 | 301.2 | 40 | 5.46 | ES- | 2 |
| 30 | PC 18:3-22:0 | 898.7 | 15 | 277.3 | 40 | 5.46 | ES- | 1 |
| 31 | PC 18:3-22:0 | 898.7 | 15 | 339.2 | 40 | 5.46 | ES- | 2 |
| 32 | PC 18:3-22:1 | 896.6 | 15 | 277.3 | 40 | 5.46 | ES- | 1 |
| 33 | PC 18:3-22:1 | 896.6 | 15 | 337.2 | 40 | 5.46 | ES- | 2 |
| 34 | PC 18:3-22:2 | 894.6 | 15 | 277.3 | 40 | 5.46 | ES- | 1 |
| 35 | PC 18:3-22:2 | 894.6 | 15 | 335.2 | 40 | 5.46 | ES- | 2 |
| 36 | PC 18:3-22:3 | 892.6 | 15 | 277.3 | 40 | 5.46 | ES- | 1 |
| 37 | PC 18:3-22:3 | 892.6 | 15 | 333.2 | 40 | 5.46 | ES- | 2 |
| 38 | PC 18:3-22:4 | 890.6 | 15 | 277.3 | 40 | 5.46 | ES- | 1 |
| 39 | PC 18:3-22:4 | 890.6 | 15 | 331.2 | 40 | 5.46 | ES- | 2 |
| 40 | PC 18:3-22:5 | 888.6 | 15 | 277.3 | 40 | 5.46 | ES- | 1 |
| 41 | PC 18:3-22:5 | 888.6 | 15 | 329.2 | 40 | 5.46 | ES- | 2 |
| 42 | PC 18:3-22:6 | 886.6 | 15 | 277.3 | 40 | 5.46 | ES- | 1 |
| 43 | PC 18:3-22:6 | 886.6 | 15 | 327.2 | 40 | 5.46 | ES- | 2 |
| 44 | PC 18:4-18:4 | 832.5 | 15 | 275.3 | 40 | 5.46 | ES- | 1 |
| 45 | PC 18:4-20:0 | 868.6 | 15 | 275.3 | 40 | 5.46 | ES- | 1 |



|    |              |       |    |       |    |      |     |   |
|----|--------------|-------|----|-------|----|------|-----|---|
| 46 | PC 18:4-20:0 | 868.6 | 15 | 311.2 | 40 | 5.46 | ES- | 2 |
| 47 | PC 18:4-20:1 | 866.6 | 15 | 275.3 | 40 | 5.46 | ES- | 1 |
| 48 | PC 18:4-20:1 | 866.6 | 15 | 309.2 | 40 | 5.46 | ES- | 2 |
| 49 | PC 18:4-20:2 | 864.6 | 15 | 275.3 | 40 | 5.46 | ES- | 1 |
| 50 | PC 18:4-20:2 | 864.6 | 15 | 307.2 | 40 | 5.46 | ES- | 2 |
| 51 | PC 18:4-20:3 | 862.6 | 15 | 275.3 | 40 | 5.46 | ES- | 1 |
| 52 | PC 18:4-20:3 | 862.6 | 15 | 305.2 | 40 | 5.46 | ES- | 2 |
| 53 | PC 18:4-20:4 | 860.5 | 15 | 275.3 | 40 | 5.46 | ES- | 1 |
| 54 | PC 18:4-20:4 | 860.5 | 15 | 303.2 | 40 | 5.46 | ES- | 2 |
| 55 | PC 18:4-20:5 | 858.5 | 15 | 275.3 | 40 | 5.46 | ES- | 1 |
| 56 | PC 18:4-20:5 | 858.5 | 15 | 301.2 | 40 | 5.46 | ES- | 2 |
| 57 | PC 18:4-22:0 | 896.6 | 15 | 275.3 | 40 | 5.46 | ES- | 1 |
| 58 | PC 18:4-22:0 | 896.6 | 15 | 339.2 | 40 | 5.46 | ES- | 2 |
| 59 | PC 18:4-22:1 | 894.6 | 15 | 275.3 | 40 | 5.46 | ES- | 1 |
| 60 | PC 18:4-22:1 | 894.6 | 15 | 337.2 | 40 | 5.46 | ES- | 2 |
| 61 | PC 18:4-22:2 | 892.6 | 15 | 275.3 | 40 | 5.46 | ES- | 1 |
| 62 | PC 18:4-22:2 | 892.6 | 15 | 335.2 | 40 | 5.46 | ES- | 2 |
| 63 | PC 18:4-22:3 | 890.6 | 15 | 275.3 | 40 | 5.46 | ES- | 1 |
| 64 | PC 18:4-22:3 | 890.6 | 15 | 333.2 | 40 | 5.46 | ES- | 2 |
| 65 | PC 18:4-22:4 | 888.6 | 15 | 275.3 | 40 | 5.46 | ES- | 1 |
| 66 | PC 18:4-22:4 | 888.6 | 15 | 331.2 | 40 | 5.46 | ES- | 2 |
| 67 | PC 18:4-22:5 | 886.6 | 15 | 275.3 | 40 | 5.46 | ES- | 1 |
| 68 | PC 18:4-22:5 | 886.6 | 15 | 329.2 | 40 | 5.46 | ES- | 2 |
| 69 | PC 18:4-22:6 | 884.5 | 15 | 275.3 | 40 | 5.46 | ES- | 1 |
| 70 | PC 18:4-22:6 | 884.5 | 15 | 327.2 | 40 | 5.46 | ES- | 2 |
| 71 | PC 20:0-20:0 | 904.7 | 15 | 311.2 | 40 | 5.46 | ES- | 1 |
| 72 | PC 20:0-20:1 | 902.7 | 15 | 309.2 | 40 | 5.46 | ES- | 1 |
| 73 | PC 20:0-20:1 | 902.7 | 15 | 311.2 | 40 | 5.46 | ES- | 2 |
| 74 | PC 20:0-20:2 | 900.7 | 15 | 307.2 | 40 | 5.46 | ES- | 1 |
| 75 | PC 20:0-20:2 | 900.7 | 15 | 311.2 | 40 | 5.46 | ES- | 2 |
| 76 | PC 20:0-20:3 | 898.7 | 15 | 305.2 | 40 | 5.46 | ES- | 1 |
| 77 | PC 20:0-20:3 | 898.7 | 15 | 311.2 | 40 | 5.46 | ES- | 2 |
| 78 | PC 20:0-20:4 | 896.6 | 15 | 303.2 | 40 | 5.46 | ES- | 1 |
| 79 | PC 20:0-20:4 | 896.6 | 15 | 311.2 | 40 | 5.46 | ES- | 2 |
| 80 | PC 20:0-20:5 | 894.6 | 15 | 301.2 | 40 | 5.46 | ES- | 1 |

|     |              |       |    |       |    |      |     |   |
|-----|--------------|-------|----|-------|----|------|-----|---|
| 81  | PC 20:0-20:5 | 894.6 | 15 | 311.2 | 40 | 5.46 | ES- | 2 |
| 82  | PC 20:0-22:0 | 932.7 | 15 | 311.2 | 40 | 5.46 | ES- | 1 |
| 83  | PC 20:0-22:0 | 932.7 | 15 | 339.2 | 40 | 5.46 | ES- | 2 |
| 84  | PC 20:0-22:1 | 930.7 | 15 | 311.2 | 40 | 5.46 | ES- | 1 |
| 85  | PC 20:0-22:1 | 930.7 | 15 | 337.2 | 40 | 5.46 | ES- | 2 |
| 86  | PC 20:0-22:2 | 928.7 | 15 | 311.2 | 40 | 5.46 | ES- | 1 |
| 87  | PC 20:0-22:2 | 928.7 | 15 | 335.2 | 40 | 5.46 | ES- | 2 |
| 88  | PC 20:0-22:3 | 926.7 | 15 | 311.2 | 40 | 5.46 | ES- | 1 |
| 89  | PC 20:0-22:3 | 926.7 | 15 | 333.2 | 40 | 5.46 | ES- | 2 |
| 90  | PC 20:0-22:4 | 924.7 | 15 | 311.2 | 40 | 5.46 | ES- | 1 |
| 91  | PC 20:0-22:4 | 924.7 | 15 | 331.2 | 40 | 5.46 | ES- | 2 |
| 92  | PC 20:0-22:5 | 922.7 | 15 | 311.2 | 40 | 5.46 | ES- | 1 |
| 93  | PC 20:0-22:5 | 922.7 | 15 | 329.2 | 40 | 5.46 | ES- | 2 |
| 94  | PC 20:0-22:6 | 920.6 | 15 | 311.2 | 40 | 5.46 | ES- | 1 |
| 95  | PC 20:0-22:6 | 920.6 | 15 | 327.2 | 40 | 5.46 | ES- | 2 |
| 96  | PC 20:1-20:1 | 900.7 | 15 | 309.2 | 40 | 5.46 | ES- | 1 |
| 97  | PC 20:1-20:2 | 898.7 | 15 | 307.2 | 40 | 5.46 | ES- | 1 |
| 98  | PC 20:1-20:2 | 898.7 | 15 | 309.2 | 40 | 5.46 | ES- | 2 |
| 99  | PC 20:1-20:3 | 896.6 | 15 | 305.2 | 40 | 5.46 | ES- | 1 |
| 100 | PC 20:1-20:3 | 896.6 | 15 | 309.2 | 40 | 5.46 | ES- | 2 |
| 101 | PC 20:1-20:4 | 894.6 | 15 | 303.2 | 40 | 5.46 | ES- | 1 |
| 102 | PC 20:1-20:4 | 894.6 | 15 | 309.2 | 40 | 5.46 | ES- | 2 |
| 103 | PC 20:1-20:5 | 892.6 | 15 | 301.2 | 40 | 5.46 | ES- | 1 |
| 104 | PC 20:1-20:5 | 892.6 | 15 | 309.2 | 40 | 5.46 | ES- | 2 |
| 105 | PC 20:1-22:0 | 930.7 | 15 | 309.2 | 40 | 5.46 | ES- | 1 |
| 106 | PC 20:1-22:0 | 930.7 | 15 | 339.2 | 40 | 5.46 | ES- | 2 |
| 107 | PC 20:1-22:1 | 928.7 | 15 | 309.2 | 40 | 5.46 | ES- | 1 |
| 108 | PC 20:1-22:1 | 928.7 | 15 | 337.2 | 40 | 5.46 | ES- | 2 |
| 109 | PC 20:1-22:2 | 926.7 | 15 | 309.2 | 40 | 5.46 | ES- | 1 |
| 110 | PC 20:1-22:2 | 926.7 | 15 | 335.2 | 40 | 5.46 | ES- | 2 |
| 111 | PC 20:1-22:3 | 924.7 | 15 | 309.2 | 40 | 5.46 | ES- | 1 |
| 112 | PC 20:1-22:3 | 924.7 | 15 | 333.2 | 40 | 5.46 | ES- | 2 |
| 113 | PC 20:1-22:4 | 922.7 | 15 | 309.2 | 40 | 5.46 | ES- | 1 |
| 114 | PC 20:1-22:4 | 922.7 | 15 | 331.2 | 40 | 5.46 | ES- | 2 |
| 115 | PC 20:1-22:5 | 920.6 | 15 | 309.2 | 40 | 5.46 | ES- | 1 |

|     |              |       |    |       |    |      |     |   |
|-----|--------------|-------|----|-------|----|------|-----|---|
| 116 | PC 20:1-22:5 | 920.6 | 15 | 329.2 | 40 | 5.46 | ES- | 2 |
| 117 | PC 20:1-22:6 | 918.6 | 15 | 309.2 | 40 | 5.46 | ES- | 1 |
| 118 | PC 20:1-22:6 | 918.6 | 15 | 327.2 | 40 | 5.46 | ES- | 2 |
| 119 | PC 20:2-20:2 | 896.6 | 15 | 307.2 | 40 | 5.46 | ES- | 1 |
| 120 | PC 20:2-20:3 | 894.6 | 15 | 305.2 | 40 | 5.46 | ES- | 1 |
| 121 | PC 20:2-20:3 | 894.6 | 15 | 307.2 | 40 | 5.46 | ES- | 2 |
| 122 | PC 20:2-20:4 | 892.6 | 15 | 303.2 | 40 | 5.46 | ES- | 1 |
| 123 | PC 20:2-20:4 | 892.6 | 15 | 307.2 | 40 | 5.46 | ES- | 2 |
| 124 | PC 20:2-20:5 | 890.6 | 15 | 301.2 | 40 | 5.46 | ES- | 1 |
| 125 | PC 20:2-20:5 | 890.6 | 15 | 307.2 | 40 | 5.46 | ES- | 2 |
| 126 | PC 20:2-22:0 | 928.7 | 15 | 307.2 | 40 | 5.46 | ES- | 1 |
| 127 | PC 20:2-22:0 | 928.7 | 15 | 339.2 | 40 | 5.46 | ES- | 2 |
| 128 | PC 20:2-22:1 | 926.7 | 15 | 307.2 | 40 | 5.46 | ES- | 1 |
| 129 | PC 20:2-22:1 | 926.7 | 15 | 337.2 | 40 | 5.46 | ES- | 2 |
| 130 | PC 20:2-22:2 | 924.7 | 15 | 307.2 | 40 | 5.46 | ES- | 1 |
| 131 | PC 20:2-22:2 | 924.7 | 15 | 335.2 | 40 | 5.46 | ES- | 2 |
| 132 | PC 20:2-22:3 | 922.7 | 15 | 307.2 | 40 | 5.46 | ES- | 1 |
| 133 | PC 20:2-22:3 | 922.7 | 15 | 333.2 | 40 | 5.46 | ES- | 2 |
| 134 | PC 20:2-22:4 | 920.6 | 15 | 307.2 | 40 | 5.46 | ES- | 1 |
| 135 | PC 20:2-22:4 | 920.6 | 15 | 331.2 | 40 | 5.46 | ES- | 2 |
| 136 | PC 20:2-22:5 | 918.6 | 15 | 307.2 | 40 | 5.46 | ES- | 1 |
| 137 | PC 20:2-22:5 | 918.6 | 15 | 329.2 | 40 | 5.46 | ES- | 2 |
| 138 | PC 20:2-22:6 | 916.6 | 15 | 307.2 | 40 | 5.46 | ES- | 1 |
| 139 | PC 20:2-22:6 | 916.6 | 15 | 327.2 | 40 | 5.46 | ES- | 2 |
| 140 | PC 20:3-20:3 | 892.6 | 15 | 305.2 | 40 | 5.46 | ES- | 1 |
| 141 | PC 20:3-20:4 | 890.6 | 15 | 303.2 | 40 | 5.46 | ES- | 1 |
| 142 | PC 20:3-20:4 | 890.6 | 15 | 305.2 | 40 | 5.46 | ES- | 2 |
| 143 | PC 20:3-20:5 | 888.6 | 15 | 301.2 | 40 | 5.46 | ES- | 1 |
| 144 | PC 20:3-20:5 | 888.6 | 15 | 305.2 | 40 | 5.46 | ES- | 2 |
| 145 | PE 18:2-22:0 | 798.6 | 50 | 279.3 | 25 | 6.32 | ES- | 1 |
| 146 | PE 18:2-22:0 | 798.6 | 50 | 339.2 | 25 | 6.32 | ES- | 2 |
| 147 | PE 18:2-22:1 | 796.6 | 50 | 279.3 | 25 | 6.32 | ES- | 1 |
| 148 | PE 18:2-22:1 | 796.6 | 50 | 337.2 | 25 | 6.32 | ES- | 2 |
| 149 | PE 18:2-22:2 | 794.6 | 50 | 279.3 | 25 | 6.32 | ES- | 1 |
| 150 | PE 18:2-22:2 | 794.6 | 50 | 335.2 | 25 | 6.32 | ES- | 2 |

|     |              |       |    |       |    |      |     |   |
|-----|--------------|-------|----|-------|----|------|-----|---|
| 151 | PE 18:2-22:3 | 792.6 | 50 | 279.3 | 25 | 6.32 | ES- | 1 |
| 152 | PE 18:2-22:3 | 792.6 | 50 | 333.2 | 25 | 6.32 | ES- | 2 |
| 153 | PE 18:2-22:4 | 790.5 | 50 | 279.3 | 25 | 6.32 | ES- | 1 |
| 154 | PE 18:2-22:4 | 790.5 | 50 | 331.2 | 25 | 6.32 | ES- | 2 |
| 155 | PE 18:2-22:5 | 788.5 | 50 | 279.3 | 25 | 6.32 | ES- | 1 |
| 156 | PE 18:2-22:5 | 788.5 | 50 | 329.2 | 25 | 6.32 | ES- | 2 |
| 157 | PE 18:2-22:6 | 786.5 | 50 | 279.3 | 25 | 6.32 | ES- | 1 |
| 158 | PE 18:2-22:6 | 786.5 | 50 | 327.2 | 25 | 6.32 | ES- | 2 |
| 159 | PE 18:3-18:3 | 734.5 | 50 | 277.3 | 25 | 6.32 | ES- | 1 |
| 160 | PE 18:3-18:4 | 732.5 | 50 | 275.3 | 25 | 6.32 | ES- | 1 |
| 161 | PE 18:3-18:4 | 732.5 | 50 | 277.3 | 25 | 6.32 | ES- | 2 |
| 162 | PE 18:3-20:0 | 768.6 | 50 | 277.3 | 25 | 6.32 | ES- | 1 |
| 163 | PE 18:3-20:0 | 768.6 | 50 | 311.2 | 25 | 6.32 | ES- | 2 |
| 164 | PE 18:3-20:1 | 766.5 | 50 | 277.3 | 25 | 6.32 | ES- | 1 |
| 165 | PE 18:3-20:1 | 766.5 | 50 | 309.2 | 25 | 6.32 | ES- | 2 |
| 166 | PE 18:3-20:2 | 764.5 | 50 | 277.3 | 25 | 6.32 | ES- | 1 |
| 167 | PE 18:3-20:2 | 764.5 | 50 | 307.2 | 25 | 6.32 | ES- | 2 |
| 168 | PE 18:3-20:3 | 762.5 | 50 | 277.3 | 25 | 6.32 | ES- | 1 |
| 169 | PE 18:3-20:3 | 762.5 | 50 | 305.2 | 25 | 6.32 | ES- | 2 |
| 170 | PE 18:3-20:4 | 760.5 | 50 | 277.3 | 25 | 6.32 | ES- | 1 |
| 171 | PE 18:3-20:4 | 760.5 | 50 | 303.2 | 25 | 6.32 | ES- | 2 |
| 172 | PE 18:3-20:5 | 758.5 | 50 | 277.3 | 25 | 6.32 | ES- | 1 |
| 173 | PE 18:3-20:5 | 758.5 | 50 | 301.2 | 25 | 6.32 | ES- | 2 |
| 174 | PE 18:3-22:0 | 796.6 | 50 | 277.3 | 25 | 6.32 | ES- | 1 |
| 175 | PE 18:3-22:0 | 796.6 | 50 | 339.2 | 25 | 6.32 | ES- | 2 |
| 176 | PE 18:3-22:1 | 794.6 | 50 | 277.3 | 25 | 6.32 | ES- | 1 |
| 177 | PE 18:3-22:1 | 794.6 | 50 | 337.2 | 25 | 6.32 | ES- | 2 |
| 178 | PE 18:3-22:2 | 792.6 | 50 | 277.3 | 25 | 6.32 | ES- | 1 |
| 179 | PE 18:3-22:2 | 792.6 | 50 | 335.2 | 25 | 6.32 | ES- | 2 |
| 180 | PE 18:3-22:3 | 790.5 | 50 | 277.3 | 25 | 6.32 | ES- | 1 |
| 181 | PE 18:3-22:3 | 790.5 | 50 | 333.2 | 25 | 6.32 | ES- | 2 |
| 182 | PE 18:3-22:4 | 788.5 | 50 | 277.3 | 25 | 6.32 | ES- | 1 |
| 183 | PE 18:3-22:4 | 788.5 | 50 | 331.2 | 25 | 6.32 | ES- | 2 |
| 184 | PE 18:3-22:5 | 786.5 | 50 | 277.3 | 25 | 6.32 | ES- | 1 |
| 185 | PE 18:3-22:5 | 786.5 | 50 | 329.2 | 25 | 6.32 | ES- | 2 |

|     |              |       |    |       |    |      |     |   |
|-----|--------------|-------|----|-------|----|------|-----|---|
| 186 | PE 18:3-22:6 | 784.5 | 50 | 277.3 | 25 | 6.32 | ES- | 1 |
| 187 | PE 18:3-22:6 | 784.5 | 50 | 327.2 | 25 | 6.32 | ES- | 2 |
| 188 | PE 18:4-18:4 | 730.4 | 50 | 275.3 | 25 | 6.32 | ES- | 1 |
| 189 | PE 18:4-20:0 | 766.5 | 50 | 275.3 | 25 | 6.32 | ES- | 1 |
| 190 | PE 18:4-20:0 | 766.5 | 50 | 311.2 | 25 | 6.32 | ES- | 2 |
| 191 | PE 18:4-20:1 | 764.5 | 50 | 275.3 | 25 | 6.32 | ES- | 1 |
| 192 | PE 18:4-20:1 | 764.5 | 50 | 309.2 | 25 | 6.32 | ES- | 2 |
| 193 | PE 18:4-20:2 | 762.5 | 50 | 275.3 | 25 | 6.32 | ES- | 1 |
| 194 | PE 18:4-20:2 | 762.5 | 50 | 307.2 | 25 | 6.32 | ES- | 2 |
| 195 | PE 18:4-20:3 | 760.5 | 50 | 275.3 | 25 | 6.32 | ES- | 1 |
| 196 | PE 18:4-20:3 | 760.5 | 50 | 305.2 | 25 | 6.32 | ES- | 2 |
| 197 | PE 18:4-20:4 | 758.5 | 50 | 275.3 | 25 | 6.32 | ES- | 1 |
| 198 | PE 18:4-20:4 | 758.5 | 50 | 303.2 | 25 | 6.32 | ES- | 2 |
| 199 | PE 18:4-20:5 | 756.5 | 50 | 275.3 | 25 | 6.32 | ES- | 1 |
| 200 | PE 18:4-20:5 | 756.5 | 50 | 301.2 | 25 | 6.32 | ES- | 2 |
| 201 | PE 18:4-22:0 | 794.6 | 50 | 275.3 | 25 | 6.32 | ES- | 1 |
| 202 | PE 18:4-22:0 | 794.6 | 50 | 339.2 | 25 | 6.32 | ES- | 2 |
| 203 | PE 18:4-22:1 | 792.6 | 50 | 275.3 | 25 | 6.32 | ES- | 1 |
| 204 | PE 18:4-22:1 | 792.6 | 50 | 337.2 | 25 | 6.32 | ES- | 2 |
| 205 | PE 18:4-22:2 | 790.5 | 50 | 275.3 | 25 | 6.32 | ES- | 1 |
| 206 | PE 18:4-22:2 | 790.5 | 50 | 335.2 | 25 | 6.32 | ES- | 2 |
| 207 | PE 18:4-22:3 | 788.5 | 50 | 275.3 | 25 | 6.32 | ES- | 1 |
| 208 | PE 18:4-22:3 | 788.5 | 50 | 333.2 | 25 | 6.32 | ES- | 2 |
| 209 | PE 18:4-22:4 | 786.5 | 50 | 275.3 | 25 | 6.32 | ES- | 1 |
| 210 | PE 18:4-22:4 | 786.5 | 50 | 331.2 | 25 | 6.32 | ES- | 2 |
| 211 | PE 18:4-22:5 | 784.5 | 50 | 275.3 | 25 | 6.32 | ES- | 1 |
| 212 | PE 18:4-22:5 | 784.5 | 50 | 329.2 | 25 | 6.32 | ES- | 2 |
| 213 | PE 18:4-22:6 | 782.5 | 50 | 275.3 | 25 | 6.32 | ES- | 1 |
| 214 | PE 18:4-22:6 | 782.5 | 50 | 327.2 | 25 | 6.32 | ES- | 2 |
| 215 | PE 20:0-20:0 | 802.6 | 50 | 311.2 | 25 | 6.32 | ES- | 1 |
| 216 | PE 20:0-20:1 | 800.6 | 50 | 309.2 | 25 | 6.32 | ES- | 1 |
| 217 | PE 20:0-20:1 | 800.6 | 50 | 311.2 | 25 | 6.32 | ES- | 2 |
| 218 | PE 20:0-20:2 | 798.6 | 50 | 307.2 | 25 | 6.32 | ES- | 1 |
| 219 | PE 20:0-20:2 | 798.6 | 50 | 311.2 | 25 | 6.32 | ES- | 2 |
| 220 | PE 20:0-20:3 | 796.6 | 50 | 305.2 | 25 | 6.32 | ES- | 1 |

|     |              |       |    |       |    |      |     |   |
|-----|--------------|-------|----|-------|----|------|-----|---|
| 221 | PE 20:0-20:3 | 796.6 | 50 | 311.2 | 25 | 6.32 | ES- | 2 |
| 222 | PE 20:0-20:4 | 794.6 | 50 | 303.2 | 25 | 6.32 | ES- | 1 |
| 223 | PE 20:0-20:4 | 794.6 | 50 | 311.2 | 25 | 6.32 | ES- | 2 |
| 224 | PE 20:0-20:5 | 792.6 | 50 | 301.2 | 25 | 6.32 | ES- | 1 |
| 225 | PE 20:0-20:5 | 792.6 | 50 | 311.2 | 25 | 6.32 | ES- | 2 |
| 226 | PE 20:0-22:0 | 830.7 | 50 | 311.2 | 25 | 6.32 | ES- | 1 |
| 227 | PE 20:0-22:0 | 830.7 | 50 | 339.2 | 25 | 6.32 | ES- | 2 |
| 228 | PE 20:0-22:1 | 828.6 | 50 | 311.2 | 25 | 6.32 | ES- | 1 |
| 229 | PE 20:0-22:1 | 828.6 | 50 | 337.2 | 25 | 6.32 | ES- | 2 |
| 230 | PE 20:0-22:2 | 826.6 | 50 | 311.2 | 25 | 6.32 | ES- | 1 |
| 231 | PE 20:0-22:2 | 826.6 | 50 | 335.2 | 25 | 6.32 | ES- | 2 |
| 232 | PE 20:0-22:3 | 824.6 | 50 | 311.2 | 25 | 6.32 | ES- | 1 |
| 233 | PE 20:0-22:3 | 824.6 | 50 | 333.2 | 25 | 6.32 | ES- | 2 |
| 234 | PE 20:0-22:4 | 822.6 | 50 | 311.2 | 25 | 6.32 | ES- | 1 |
| 235 | PE 20:0-22:4 | 822.6 | 50 | 331.2 | 25 | 6.32 | ES- | 2 |
| 236 | PE 20:0-22:5 | 820.6 | 50 | 311.2 | 25 | 6.32 | ES- | 1 |
| 237 | PE 20:0-22:5 | 820.6 | 50 | 329.2 | 25 | 6.32 | ES- | 2 |
| 238 | PE 20:0-22:6 | 818.6 | 50 | 311.2 | 25 | 6.32 | ES- | 1 |
| 239 | PE 20:0-22:6 | 818.6 | 50 | 327.2 | 25 | 6.32 | ES- | 2 |
| 240 | PE 20:1-20:1 | 798.6 | 50 | 309.2 | 25 | 6.32 | ES- | 1 |
| 241 | PE 20:1-20:2 | 796.6 | 50 | 307.2 | 25 | 6.32 | ES- | 1 |
| 242 | PE 20:1-20:2 | 796.6 | 50 | 309.2 | 25 | 6.32 | ES- | 2 |
| 243 | PE 20:1-20:3 | 794.6 | 50 | 305.2 | 25 | 6.32 | ES- | 1 |
| 244 | PE 20:1-20:3 | 794.6 | 50 | 309.2 | 25 | 6.32 | ES- | 2 |
| 245 | PE 20:1-20:4 | 792.6 | 50 | 303.2 | 25 | 6.32 | ES- | 1 |
| 246 | PE 20:1-20:4 | 792.6 | 50 | 309.2 | 25 | 6.32 | ES- | 2 |
| 247 | PE 20:1-20:5 | 790.5 | 50 | 301.2 | 25 | 6.32 | ES- | 1 |
| 248 | PE 20:1-20:5 | 790.5 | 50 | 309.2 | 25 | 6.32 | ES- | 2 |
| 249 | PE 20:1-22:0 | 828.6 | 50 | 309.2 | 25 | 6.32 | ES- | 1 |
| 250 | PE 20:1-22:0 | 828.6 | 50 | 339.2 | 25 | 6.32 | ES- | 2 |
| 251 | PE 20:1-22:1 | 826.6 | 50 | 309.2 | 25 | 6.32 | ES- | 1 |
| 252 | PE 20:1-22:1 | 826.6 | 50 | 337.2 | 25 | 6.32 | ES- | 2 |
| 253 | PE 20:1-22:2 | 824.6 | 50 | 309.2 | 25 | 6.32 | ES- | 1 |
| 254 | PE 20:1-22:2 | 824.6 | 50 | 335.2 | 25 | 6.32 | ES- | 2 |
| 255 | PE 20:1-22:3 | 822.6 | 50 | 309.2 | 25 | 6.32 | ES- | 1 |

|     |              |       |    |       |    |      |     |   |
|-----|--------------|-------|----|-------|----|------|-----|---|
| 256 | PE 20:1-22:3 | 822.6 | 50 | 333.2 | 25 | 6.32 | ES- | 2 |
| 257 | PE 20:1-22:4 | 820.6 | 50 | 309.2 | 25 | 6.32 | ES- | 1 |
| 258 | PE 20:1-22:4 | 820.6 | 50 | 331.2 | 25 | 6.32 | ES- | 2 |
| 259 | PE 20:1-22:5 | 818.6 | 50 | 309.2 | 25 | 6.32 | ES- | 1 |
| 260 | PE 20:1-22:5 | 818.6 | 50 | 329.2 | 25 | 6.32 | ES- | 2 |
| 261 | PE 20:1-22:6 | 816.6 | 50 | 309.2 | 25 | 6.32 | ES- | 1 |
| 262 | PE 20:1-22:6 | 816.6 | 50 | 327.2 | 25 | 6.32 | ES- | 2 |
| 263 | PE 20:2-20:2 | 794.6 | 50 | 307.2 | 25 | 6.32 | ES- | 1 |
| 264 | PE 20:2-20:3 | 792.6 | 50 | 305.2 | 25 | 6.32 | ES- | 1 |
| 265 | PE 20:2-20:3 | 792.6 | 50 | 307.2 | 25 | 6.32 | ES- | 2 |
| 266 | PE 20:2-20:4 | 790.5 | 50 | 303.2 | 25 | 6.32 | ES- | 1 |
| 267 | PE 20:2-20:4 | 790.5 | 50 | 307.2 | 25 | 6.32 | ES- | 2 |
| 268 | PE 20:2-20:5 | 788.5 | 50 | 301.2 | 25 | 6.32 | ES- | 1 |
| 269 | PE 20:2-20:5 | 788.5 | 50 | 307.2 | 25 | 6.32 | ES- | 2 |
| 270 | PE 20:2-22:0 | 826.6 | 50 | 307.2 | 25 | 6.32 | ES- | 1 |
| 271 | PE 20:2-22:0 | 826.6 | 50 | 339.2 | 25 | 6.32 | ES- | 2 |
| 272 | PE 20:2-22:1 | 824.6 | 50 | 307.2 | 25 | 6.32 | ES- | 1 |
| 273 | PE 20:2-22:1 | 824.6 | 50 | 337.2 | 25 | 6.32 | ES- | 2 |
| 274 | PE 20:2-22:2 | 822.6 | 50 | 307.2 | 25 | 6.32 | ES- | 1 |
| 275 | PE 20:2-22:2 | 822.6 | 50 | 335.2 | 25 | 6.32 | ES- | 2 |
| 276 | PE 20:2-22:3 | 820.6 | 50 | 307.2 | 25 | 6.32 | ES- | 1 |
| 277 | PE 20:2-22:3 | 820.6 | 50 | 333.2 | 25 | 6.32 | ES- | 2 |
| 278 | PE 20:2-22:4 | 818.6 | 50 | 307.2 | 25 | 6.32 | ES- | 1 |
| 279 | PE 20:2-22:4 | 818.6 | 50 | 331.2 | 25 | 6.32 | ES- | 2 |
| 280 | PE 20:2-22:5 | 816.6 | 50 | 307.2 | 25 | 6.32 | ES- | 1 |
| 281 | PE 20:2-22:5 | 816.6 | 50 | 329.2 | 25 | 6.32 | ES- | 2 |
| 282 | PE 20:2-22:6 | 814.5 | 50 | 307.2 | 25 | 6.32 | ES- | 1 |
| 283 | PE 20:2-22:6 | 814.5 | 50 | 327.2 | 25 | 6.32 | ES- | 2 |
| 284 | PE 20:3-20:3 | 790.5 | 50 | 305.2 | 25 | 6.32 | ES- | 1 |
| 285 | PE 20:3-20:4 | 788.5 | 50 | 303.2 | 25 | 6.32 | ES- | 1 |
| 286 | PE 20:3-20:4 | 788.5 | 50 | 305.2 | 25 | 6.32 | ES- | 2 |
| 287 | PE 20:3-20:5 | 786.5 | 50 | 301.2 | 25 | 6.32 | ES- | 1 |
| 288 | PE 20:3-20:5 | 786.5 | 50 | 305.2 | 25 | 6.32 | ES- | 2 |
| 289 | PG 18:2-22:0 | 829.6 | 30 | 279.3 | 40 | 8.99 | ES- | 1 |
| 290 | PG 18:2-22:0 | 829.6 | 30 | 339.2 | 40 | 8.99 | ES- | 2 |

|     |              |       |    |       |    |      |     |   |
|-----|--------------|-------|----|-------|----|------|-----|---|
| 291 | PG 18:2-22:1 | 827.6 | 30 | 279.3 | 40 | 8.99 | ES- | 1 |
| 292 | PG 18:2-22:1 | 827.6 | 30 | 337.2 | 40 | 8.99 | ES- | 2 |
| 293 | PG 18:2-22:2 | 825.6 | 30 | 279.3 | 40 | 8.99 | ES- | 1 |
| 294 | PG 18:2-22:2 | 825.6 | 30 | 335.2 | 40 | 8.99 | ES- | 2 |
| 295 | PG 18:2-22:3 | 823.5 | 30 | 279.3 | 40 | 8.99 | ES- | 1 |
| 296 | PG 18:2-22:3 | 823.5 | 30 | 333.2 | 40 | 8.99 | ES- | 2 |
| 297 | PG 18:2-22:4 | 821.5 | 30 | 279.3 | 40 | 8.99 | ES- | 1 |
| 298 | PG 18:2-22:4 | 821.5 | 30 | 331.2 | 40 | 8.99 | ES- | 2 |
| 299 | PG 18:2-22:5 | 819.5 | 30 | 279.3 | 40 | 8.99 | ES- | 1 |
| 300 | PG 18:2-22:5 | 819.5 | 30 | 329.2 | 40 | 8.99 | ES- | 2 |
| 301 | PG 18:2-22:6 | 817.5 | 30 | 279.3 | 40 | 8.99 | ES- | 1 |
| 302 | PG 18:2-22:6 | 817.5 | 30 | 327.2 | 40 | 8.99 | ES- | 2 |
| 303 | PG 18:3-18:3 | 765.5 | 30 | 277.3 | 40 | 8.99 | ES- | 1 |
| 304 | PG 18:3-18:4 | 763.5 | 30 | 275.3 | 40 | 8.99 | ES- | 1 |
| 305 | PG 18:3-18:4 | 763.5 | 30 | 277.3 | 40 | 8.99 | ES- | 2 |
| 306 | PG 18:3-20:0 | 799.5 | 30 | 277.3 | 40 | 8.99 | ES- | 1 |
| 307 | PG 18:3-20:0 | 799.5 | 30 | 311.2 | 40 | 8.99 | ES- | 2 |
| 308 | PG 18:3-20:1 | 797.5 | 30 | 277.3 | 40 | 8.99 | ES- | 1 |
| 309 | PG 18:3-20:1 | 797.5 | 30 | 309.2 | 40 | 8.99 | ES- | 2 |
| 310 | PG 18:3-20:2 | 795.5 | 30 | 277.3 | 40 | 8.99 | ES- | 1 |
| 311 | PG 18:3-20:2 | 795.5 | 30 | 307.2 | 40 | 8.99 | ES- | 2 |
| 312 | PG 18:3-20:3 | 793.5 | 30 | 277.3 | 40 | 8.99 | ES- | 1 |
| 313 | PG 18:3-20:3 | 793.5 | 30 | 305.2 | 40 | 8.99 | ES- | 2 |
| 314 | PG 18:3-20:4 | 791.5 | 30 | 277.3 | 40 | 8.99 | ES- | 1 |
| 315 | PG 18:3-20:4 | 791.5 | 30 | 303.2 | 40 | 8.99 | ES- | 2 |
| 316 | PG 18:3-20:5 | 789.5 | 30 | 277.3 | 40 | 8.99 | ES- | 1 |
| 317 | PG 18:3-20:5 | 789.5 | 30 | 301.2 | 40 | 8.99 | ES- | 2 |
| 318 | PG 18:3-22:0 | 827.6 | 30 | 277.3 | 40 | 8.99 | ES- | 1 |
| 319 | PG 18:3-22:0 | 827.6 | 30 | 339.2 | 40 | 8.99 | ES- | 2 |
| 320 | PG 18:3-22:1 | 825.6 | 30 | 277.3 | 40 | 8.99 | ES- | 1 |
| 321 | PG 18:3-22:1 | 825.6 | 30 | 337.2 | 40 | 8.99 | ES- | 2 |
| 322 | PG 18:3-22:2 | 823.5 | 30 | 277.3 | 40 | 8.99 | ES- | 1 |
| 323 | PG 18:3-22:2 | 823.5 | 30 | 335.2 | 40 | 8.99 | ES- | 2 |
| 324 | PG 18:3-22:3 | 821.5 | 30 | 277.3 | 40 | 8.99 | ES- | 1 |
| 325 | PG 18:3-22:3 | 821.5 | 30 | 333.2 | 40 | 8.99 | ES- | 2 |



|     |              |       |    |       |    |      |     |   |
|-----|--------------|-------|----|-------|----|------|-----|---|
| 326 | PG 18:3-22:4 | 819.5 | 30 | 277.3 | 40 | 8.99 | ES- | 1 |
| 327 | PG 18:3-22:4 | 819.5 | 30 | 331.2 | 40 | 8.99 | ES- | 2 |
| 328 | PG 18:3-22:5 | 817.5 | 30 | 277.3 | 40 | 8.99 | ES- | 1 |
| 329 | PG 18:3-22:5 | 817.5 | 30 | 329.2 | 40 | 8.99 | ES- | 2 |
| 330 | PG 18:3-22:6 | 815.5 | 30 | 277.3 | 40 | 8.99 | ES- | 1 |
| 331 | PG 18:3-22:6 | 815.5 | 30 | 327.2 | 40 | 8.99 | ES- | 2 |
| 332 | PG 18:4-18:4 | 761.4 | 30 | 275.3 | 40 | 8.99 | ES- | 1 |
| 333 | PG 18:4-20:0 | 797.5 | 30 | 275.3 | 40 | 8.99 | ES- | 1 |
| 334 | PG 18:4-20:0 | 797.5 | 30 | 311.2 | 40 | 8.99 | ES- | 2 |
| 335 | PG 18:4-20:1 | 795.5 | 30 | 275.3 | 40 | 8.99 | ES- | 1 |
| 336 | PG 18:4-20:1 | 795.5 | 30 | 309.2 | 40 | 8.99 | ES- | 2 |
| 337 | PG 18:4-20:2 | 793.5 | 30 | 275.3 | 40 | 8.99 | ES- | 1 |
| 338 | PG 18:4-20:2 | 793.5 | 30 | 307.2 | 40 | 8.99 | ES- | 2 |
| 339 | PG 18:4-20:3 | 791.5 | 30 | 275.3 | 40 | 8.99 | ES- | 1 |
| 340 | PG 18:4-20:3 | 791.5 | 30 | 305.2 | 40 | 8.99 | ES- | 2 |
| 341 | PG 18:4-20:4 | 789.5 | 30 | 275.3 | 40 | 8.99 | ES- | 1 |
| 342 | PG 18:4-20:4 | 789.5 | 30 | 303.2 | 40 | 8.99 | ES- | 2 |
| 343 | PG 18:4-20:5 | 787.5 | 30 | 275.3 | 40 | 8.99 | ES- | 1 |
| 344 | PG 18:4-20:5 | 787.5 | 30 | 301.2 | 40 | 8.99 | ES- | 2 |
| 345 | PG 18:4-22:0 | 825.6 | 30 | 275.3 | 40 | 8.99 | ES- | 1 |
| 346 | PG 18:4-22:0 | 825.6 | 30 | 339.2 | 40 | 8.99 | ES- | 2 |
| 347 | PG 18:4-22:1 | 823.5 | 30 | 275.3 | 40 | 8.99 | ES- | 1 |
| 348 | PG 18:4-22:1 | 823.5 | 30 | 337.2 | 40 | 8.99 | ES- | 2 |
| 349 | PG 18:4-22:2 | 821.5 | 30 | 275.3 | 40 | 8.99 | ES- | 1 |
| 350 | PG 18:4-22:2 | 821.5 | 30 | 335.2 | 40 | 8.99 | ES- | 2 |
| 351 | PG 18:4-22:3 | 819.5 | 30 | 275.3 | 40 | 8.99 | ES- | 1 |
| 352 | PG 18:4-22:3 | 819.5 | 30 | 333.2 | 40 | 8.99 | ES- | 2 |
| 353 | PG 18:4-22:4 | 817.5 | 30 | 275.3 | 40 | 8.99 | ES- | 1 |
| 354 | PG 18:4-22:4 | 817.5 | 30 | 331.2 | 40 | 8.99 | ES- | 2 |
| 355 | PG 18:4-22:5 | 815.5 | 30 | 275.3 | 40 | 8.99 | ES- | 1 |
| 356 | PG 18:4-22:5 | 815.5 | 30 | 329.2 | 40 | 8.99 | ES- | 2 |
| 357 | PG 18:4-22:6 | 813.5 | 30 | 275.3 | 40 | 8.99 | ES- | 1 |
| 358 | PG 18:4-22:6 | 813.5 | 30 | 327.2 | 40 | 8.99 | ES- | 2 |
| 359 | PG 20:0-20:0 | 833.6 | 30 | 311.2 | 40 | 8.99 | ES- | 1 |
| 360 | PG 20:0-20:1 | 831.6 | 30 | 309.2 | 40 | 8.99 | ES- | 1 |

|     |              |       |    |       |    |      |     |   |
|-----|--------------|-------|----|-------|----|------|-----|---|
| 361 | PG 20:0-20:1 | 831.6 | 30 | 311.2 | 40 | 8.99 | ES- | 2 |
| 362 | PG 20:0-20:2 | 829.6 | 30 | 307.2 | 40 | 8.99 | ES- | 1 |
| 363 | PG 20:0-20:2 | 829.6 | 30 | 311.2 | 40 | 8.99 | ES- | 2 |
| 364 | PG 20:0-20:3 | 827.6 | 30 | 305.2 | 40 | 8.99 | ES- | 1 |
| 365 | PG 20:0-20:3 | 827.6 | 30 | 311.2 | 40 | 8.99 | ES- | 2 |
| 366 | PG 20:0-20:4 | 825.6 | 30 | 303.2 | 40 | 8.99 | ES- | 1 |
| 367 | PG 20:0-20:4 | 825.6 | 30 | 311.2 | 40 | 8.99 | ES- | 2 |
| 368 | PG 20:0-20:5 | 823.5 | 30 | 301.2 | 40 | 8.99 | ES- | 1 |
| 369 | PG 20:0-20:5 | 823.5 | 30 | 311.2 | 40 | 8.99 | ES- | 2 |
| 370 | PG 20:0-22:0 | 861.7 | 30 | 311.2 | 40 | 8.99 | ES- | 1 |
| 371 | PG 20:0-22:0 | 861.7 | 30 | 339.2 | 40 | 8.99 | ES- | 2 |
| 372 | PG 20:0-22:1 | 859.6 | 30 | 311.2 | 40 | 8.99 | ES- | 1 |
| 373 | PG 20:0-22:1 | 859.6 | 30 | 337.2 | 40 | 8.99 | ES- | 2 |
| 374 | PG 20:0-22:2 | 857.6 | 30 | 311.2 | 40 | 8.99 | ES- | 1 |
| 375 | PG 20:0-22:2 | 857.6 | 30 | 335.2 | 40 | 8.99 | ES- | 2 |
| 376 | PG 20:0-22:3 | 855.6 | 30 | 311.2 | 40 | 8.99 | ES- | 1 |
| 377 | PG 20:0-22:3 | 855.6 | 30 | 333.2 | 40 | 8.99 | ES- | 2 |
| 378 | PG 20:0-22:4 | 853.6 | 30 | 311.2 | 40 | 8.99 | ES- | 1 |
| 379 | PG 20:0-22:4 | 853.6 | 30 | 331.2 | 40 | 8.99 | ES- | 2 |
| 380 | PG 20:0-22:5 | 851.6 | 30 | 311.2 | 40 | 8.99 | ES- | 1 |
| 381 | PG 20:0-22:5 | 851.6 | 30 | 329.2 | 40 | 8.99 | ES- | 2 |
| 382 | PG 20:0-22:6 | 849.6 | 30 | 311.2 | 40 | 8.99 | ES- | 1 |
| 383 | PG 20:0-22:6 | 849.6 | 30 | 327.2 | 40 | 8.99 | ES- | 2 |
| 384 | PG 20:1-20:1 | 829.6 | 30 | 309.2 | 40 | 8.99 | ES- | 1 |
| 385 | PG 20:1-20:2 | 827.6 | 30 | 307.2 | 40 | 8.99 | ES- | 1 |
| 386 | PG 20:1-20:2 | 827.6 | 30 | 309.2 | 40 | 8.99 | ES- | 2 |
| 387 | PG 20:1-20:3 | 825.6 | 30 | 305.2 | 40 | 8.99 | ES- | 1 |
| 388 | PG 20:1-20:3 | 825.6 | 30 | 309.2 | 40 | 8.99 | ES- | 2 |
| 389 | PG 20:1-20:4 | 823.5 | 30 | 303.2 | 40 | 8.99 | ES- | 1 |
| 390 | PG 20:1-20:4 | 823.5 | 30 | 309.2 | 40 | 8.99 | ES- | 2 |
| 391 | PG 20:1-20:5 | 821.5 | 30 | 301.2 | 40 | 8.99 | ES- | 1 |
| 392 | PG 20:1-20:5 | 821.5 | 30 | 309.2 | 40 | 8.99 | ES- | 2 |
| 393 | PG 20:1-22:0 | 859.6 | 30 | 309.2 | 40 | 8.99 | ES- | 1 |
| 394 | PG 20:1-22:0 | 859.6 | 30 | 339.2 | 40 | 8.99 | ES- | 2 |
| 395 | PG 20:1-22:1 | 857.6 | 30 | 309.2 | 40 | 8.99 | ES- | 1 |

|     |              |       |    |       |    |      |     |   |
|-----|--------------|-------|----|-------|----|------|-----|---|
| 396 | PG 20:1-22:1 | 857.6 | 30 | 337.2 | 40 | 8.99 | ES- | 2 |
| 397 | PG 20:1-22:2 | 855.6 | 30 | 309.2 | 40 | 8.99 | ES- | 1 |
| 398 | PG 20:1-22:2 | 855.6 | 30 | 335.2 | 40 | 8.99 | ES- | 2 |
| 399 | PG 20:1-22:3 | 853.6 | 30 | 309.2 | 40 | 8.99 | ES- | 1 |
| 400 | PG 20:1-22:3 | 853.6 | 30 | 333.2 | 40 | 8.99 | ES- | 2 |
| 401 | PG 20:1-22:4 | 851.6 | 30 | 309.2 | 40 | 8.99 | ES- | 1 |
| 402 | PG 20:1-22:4 | 851.6 | 30 | 331.2 | 40 | 8.99 | ES- | 2 |
| 403 | PG 20:1-22:5 | 849.6 | 30 | 309.2 | 40 | 8.99 | ES- | 1 |
| 404 | PG 20:1-22:5 | 849.6 | 30 | 329.2 | 40 | 8.99 | ES- | 2 |
| 405 | PG 20:1-22:6 | 847.5 | 30 | 309.2 | 40 | 8.99 | ES- | 1 |
| 406 | PG 20:1-22:6 | 847.5 | 30 | 327.2 | 40 | 8.99 | ES- | 2 |
| 407 | PG 20:2-20:2 | 825.6 | 30 | 307.2 | 40 | 8.99 | ES- | 1 |
| 408 | PG 20:2-20:3 | 823.5 | 30 | 305.2 | 40 | 8.99 | ES- | 1 |
| 409 | PG 20:2-20:3 | 823.5 | 30 | 307.2 | 40 | 8.99 | ES- | 2 |
| 410 | PG 20:2-20:4 | 821.5 | 30 | 303.2 | 40 | 8.99 | ES- | 1 |
| 411 | PG 20:2-20:4 | 821.5 | 30 | 307.2 | 40 | 8.99 | ES- | 2 |
| 412 | PG 20:2-20:5 | 819.5 | 30 | 301.2 | 40 | 8.99 | ES- | 1 |
| 413 | PG 20:2-20:5 | 819.5 | 30 | 307.2 | 40 | 8.99 | ES- | 2 |
| 414 | PG 20:2-22:0 | 857.6 | 30 | 307.2 | 40 | 8.99 | ES- | 1 |
| 415 | PG 20:2-22:0 | 857.6 | 30 | 339.2 | 40 | 8.99 | ES- | 2 |
| 416 | PG 20:2-22:1 | 855.6 | 30 | 307.2 | 40 | 8.99 | ES- | 1 |
| 417 | PG 20:2-22:1 | 855.6 | 30 | 337.2 | 40 | 8.99 | ES- | 2 |
| 418 | PG 20:2-22:2 | 853.6 | 30 | 307.2 | 40 | 8.99 | ES- | 1 |
| 419 | PG 20:2-22:2 | 853.6 | 30 | 335.2 | 40 | 8.99 | ES- | 2 |
| 420 | PG 20:2-22:3 | 851.6 | 30 | 307.2 | 40 | 8.99 | ES- | 1 |
| 421 | PG 20:2-22:3 | 851.6 | 30 | 333.2 | 40 | 8.99 | ES- | 2 |
| 422 | PG 20:2-22:4 | 849.6 | 30 | 307.2 | 40 | 8.99 | ES- | 1 |
| 423 | PG 20:2-22:4 | 849.6 | 30 | 331.2 | 40 | 8.99 | ES- | 2 |
| 424 | PG 20:2-22:5 | 847.5 | 30 | 307.2 | 40 | 8.99 | ES- | 1 |
| 425 | PG 20:2-22:5 | 847.5 | 30 | 329.2 | 40 | 8.99 | ES- | 2 |
| 426 | PG 20:2-22:6 | 845.5 | 30 | 307.2 | 40 | 8.99 | ES- | 1 |
| 427 | PG 20:2-22:6 | 845.5 | 30 | 327.2 | 40 | 8.99 | ES- | 2 |
| 428 | PG 20:3-20:3 | 821.5 | 30 | 305.2 | 40 | 8.99 | ES- | 1 |
| 429 | PG 20:3-20:4 | 819.5 | 30 | 303.2 | 40 | 8.99 | ES- | 1 |
| 430 | PG 20:3-20:4 | 819.5 | 30 | 305.2 | 40 | 8.99 | ES- | 2 |

|     |              |       |    |       |    |       |     |   |
|-----|--------------|-------|----|-------|----|-------|-----|---|
| 431 | PG 20:3-20:5 | 817.5 | 30 | 301.2 | 40 | 8.99  | ES- | 1 |
| 432 | PG 20:3-20:5 | 817.5 | 30 | 305.2 | 40 | 8.99  | ES- | 2 |
| 433 | PS 18:2-22:0 | 842.6 | 30 | 279.3 | 50 | 12.23 | ES- | 1 |
| 434 | PS 18:2-22:0 | 842.6 | 30 | 339.2 | 50 | 12.23 | ES- | 2 |
| 435 | PS 18:2-22:1 | 840.6 | 30 | 279.3 | 50 | 12.23 | ES- | 1 |
| 436 | PS 18:2-22:1 | 840.6 | 30 | 337.2 | 50 | 12.23 | ES- | 2 |
| 437 | PS 18:2-22:2 | 838.6 | 30 | 279.3 | 50 | 12.23 | ES- | 1 |
| 438 | PS 18:2-22:2 | 838.6 | 30 | 335.2 | 50 | 12.23 | ES- | 2 |
| 439 | PS 18:2-22:3 | 836.5 | 30 | 279.3 | 50 | 12.23 | ES- | 1 |
| 440 | PS 18:2-22:3 | 836.5 | 30 | 333.2 | 50 | 12.23 | ES- | 2 |
| 441 | PS 18:2-22:4 | 834.5 | 30 | 279.3 | 50 | 12.23 | ES- | 1 |
| 442 | PS 18:2-22:4 | 834.5 | 30 | 331.2 | 50 | 12.23 | ES- | 2 |
| 443 | PS 18:2-22:5 | 832.5 | 30 | 279.3 | 50 | 12.23 | ES- | 1 |
| 444 | PS 18:2-22:5 | 832.5 | 30 | 329.2 | 50 | 12.23 | ES- | 2 |
| 445 | PS 18:2-22:6 | 830.5 | 30 | 279.3 | 50 | 12.23 | ES- | 1 |
| 446 | PS 18:2-22:6 | 830.5 | 30 | 327.2 | 50 | 12.23 | ES- | 2 |
| 447 | PS 18:3-18:3 | 778.5 | 30 | 277.3 | 50 | 12.23 | ES- | 1 |
| 448 | PS 18:3-18:4 | 776.5 | 30 | 275.3 | 50 | 12.23 | ES- | 1 |
| 449 | PS 18:3-18:4 | 776.5 | 30 | 277.3 | 50 | 12.23 | ES- | 2 |
| 450 | PS 18:3-20:0 | 812.5 | 30 | 277.3 | 50 | 12.23 | ES- | 1 |
| 451 | PS 18:3-20:0 | 812.5 | 30 | 311.2 | 50 | 12.23 | ES- | 2 |
| 452 | PS 18:3-20:1 | 810.5 | 30 | 277.3 | 50 | 12.23 | ES- | 1 |
| 453 | PS 18:3-20:1 | 810.5 | 30 | 309.2 | 50 | 12.23 | ES- | 2 |
| 454 | PS 18:3-20:2 | 808.5 | 30 | 277.3 | 50 | 12.23 | ES- | 1 |
| 455 | PS 18:3-20:2 | 808.5 | 30 | 307.2 | 50 | 12.23 | ES- | 2 |
| 456 | PS 18:3-20:3 | 806.5 | 30 | 277.3 | 50 | 12.23 | ES- | 1 |
| 457 | PS 18:3-20:3 | 806.5 | 30 | 305.2 | 50 | 12.23 | ES- | 2 |
| 458 | PS 18:3-20:4 | 804.5 | 30 | 277.3 | 50 | 12.23 | ES- | 1 |
| 459 | PS 18:3-20:4 | 804.5 | 30 | 303.2 | 50 | 12.23 | ES- | 2 |
| 460 | PS 18:3-20:5 | 802.5 | 30 | 277.3 | 50 | 12.23 | ES- | 1 |
| 461 | PS 18:3-20:5 | 802.5 | 30 | 301.2 | 50 | 12.23 | ES- | 2 |
| 462 | PS 18:3-22:0 | 840.6 | 30 | 277.3 | 50 | 12.23 | ES- | 1 |
| 463 | PS 18:3-22:0 | 840.6 | 30 | 339.2 | 50 | 12.23 | ES- | 2 |
| 464 | PS 18:3-22:1 | 838.6 | 30 | 277.3 | 50 | 12.23 | ES- | 1 |
| 465 | PS 18:3-22:1 | 838.6 | 30 | 337.2 | 50 | 12.23 | ES- | 2 |

|     |              |       |    |       |    |       |     |   |
|-----|--------------|-------|----|-------|----|-------|-----|---|
| 466 | PS 18:3-22:2 | 836.5 | 30 | 277.3 | 50 | 12.23 | ES- | 1 |
| 467 | PS 18:3-22:2 | 836.5 | 30 | 335.2 | 50 | 12.23 | ES- | 2 |
| 468 | PS 18:3-22:3 | 834.5 | 30 | 277.3 | 50 | 12.23 | ES- | 1 |
| 469 | PS 18:3-22:3 | 834.5 | 30 | 333.2 | 50 | 12.23 | ES- | 2 |
| 470 | PS 18:3-22:4 | 832.5 | 30 | 277.3 | 50 | 12.23 | ES- | 1 |
| 471 | PS 18:3-22:4 | 832.5 | 30 | 331.2 | 50 | 12.23 | ES- | 2 |
| 472 | PS 18:3-22:5 | 830.5 | 30 | 277.3 | 50 | 12.23 | ES- | 1 |
| 473 | PS 18:3-22:5 | 830.5 | 30 | 329.2 | 50 | 12.23 | ES- | 2 |
| 474 | PS 18:3-22:6 | 828.5 | 30 | 277.3 | 50 | 12.23 | ES- | 1 |
| 475 | PS 18:3-22:6 | 828.5 | 30 | 327.2 | 50 | 12.23 | ES- | 2 |
| 476 | PS 18:4-18:4 | 774.4 | 30 | 275.3 | 50 | 12.23 | ES- | 1 |
| 477 | PS 18:4-20:0 | 810.5 | 30 | 275.3 | 50 | 12.23 | ES- | 1 |
| 478 | PS 18:4-20:0 | 810.5 | 30 | 311.2 | 50 | 12.23 | ES- | 2 |
| 479 | PS 18:4-20:1 | 808.5 | 30 | 275.3 | 50 | 12.23 | ES- | 1 |
| 480 | PS 18:4-20:1 | 808.5 | 30 | 309.2 | 50 | 12.23 | ES- | 2 |
| 481 | PS 18:4-20:2 | 806.5 | 30 | 275.3 | 50 | 12.23 | ES- | 1 |
| 482 | PS 18:4-20:2 | 806.5 | 30 | 307.2 | 50 | 12.23 | ES- | 2 |
| 483 | PS 18:4-20:3 | 804.5 | 30 | 275.3 | 50 | 12.23 | ES- | 1 |
| 484 | PS 18:4-20:3 | 804.5 | 30 | 305.2 | 50 | 12.23 | ES- | 2 |
| 485 | PS 18:4-20:4 | 802.5 | 30 | 275.3 | 50 | 12.23 | ES- | 1 |
| 486 | PS 18:4-20:4 | 802.5 | 30 | 303.2 | 50 | 12.23 | ES- | 2 |
| 487 | PS 18:4-20:5 | 800.5 | 30 | 275.3 | 50 | 12.23 | ES- | 1 |
| 488 | PS 18:4-20:5 | 800.5 | 30 | 301.2 | 50 | 12.23 | ES- | 2 |
| 489 | PS 18:4-22:0 | 838.6 | 30 | 275.3 | 50 | 12.23 | ES- | 1 |
| 490 | PS 18:4-22:0 | 838.6 | 30 | 339.2 | 50 | 12.23 | ES- | 2 |
| 491 | PS 18:4-22:1 | 836.5 | 30 | 275.3 | 50 | 12.23 | ES- | 1 |
| 492 | PS 18:4-22:1 | 836.5 | 30 | 337.2 | 50 | 12.23 | ES- | 2 |
| 493 | PS 18:4-22:2 | 834.5 | 30 | 275.3 | 50 | 12.23 | ES- | 1 |
| 494 | PS 18:4-22:2 | 834.5 | 30 | 335.2 | 50 | 12.23 | ES- | 2 |
| 495 | PS 18:4-22:3 | 832.5 | 30 | 275.3 | 50 | 12.23 | ES- | 1 |
| 496 | PS 18:4-22:3 | 832.5 | 30 | 333.2 | 50 | 12.23 | ES- | 2 |
| 497 | PS 18:4-22:4 | 830.5 | 30 | 275.3 | 50 | 12.23 | ES- | 1 |
| 498 | PS 18:4-22:4 | 830.5 | 30 | 331.2 | 50 | 12.23 | ES- | 2 |
| 499 | PS 18:4-22:5 | 828.5 | 30 | 275.3 | 50 | 12.23 | ES- | 1 |
| 500 | PS 18:4-22:5 | 828.5 | 30 | 329.2 | 50 | 12.23 | ES- | 2 |

|     |              |       |    |       |    |       |     |   |
|-----|--------------|-------|----|-------|----|-------|-----|---|
| 501 | PS 18:4-22:6 | 826.5 | 30 | 275.3 | 50 | 12.23 | ES- | 1 |
| 502 | PS 18:4-22:6 | 826.5 | 30 | 327.2 | 50 | 12.23 | ES- | 2 |
| 503 | PS 20:0-20:0 | 846.6 | 30 | 311.2 | 50 | 12.23 | ES- | 1 |
| 504 | PS 20:0-20:1 | 844.6 | 30 | 309.2 | 50 | 12.23 | ES- | 1 |
| 505 | PS 20:0-20:1 | 844.6 | 30 | 311.2 | 50 | 12.23 | ES- | 2 |
| 506 | PS 20:0-20:2 | 842.6 | 30 | 307.2 | 50 | 12.23 | ES- | 1 |
| 507 | PS 20:0-20:2 | 842.6 | 30 | 311.2 | 50 | 12.23 | ES- | 2 |
| 508 | PS 20:0-20:3 | 840.6 | 30 | 305.2 | 50 | 12.23 | ES- | 1 |
| 509 | PS 20:0-20:3 | 840.6 | 30 | 311.2 | 50 | 12.23 | ES- | 2 |
| 510 | PS 20:0-20:4 | 838.6 | 30 | 303.2 | 50 | 12.23 | ES- | 1 |
| 511 | PS 20:0-20:4 | 838.6 | 30 | 311.2 | 50 | 12.23 | ES- | 2 |
| 512 | PS 20:0-20:5 | 836.5 | 30 | 301.2 | 50 | 12.23 | ES- | 1 |
| 513 | PS 20:0-20:5 | 836.5 | 30 | 311.2 | 50 | 12.23 | ES- | 2 |
| 514 | PS 20:0-22:0 | 874.7 | 30 | 311.2 | 50 | 12.23 | ES- | 1 |
| 515 | PS 20:0-22:0 | 874.7 | 30 | 339.2 | 50 | 12.23 | ES- | 2 |
| 516 | PS 20:0-22:1 | 872.6 | 30 | 311.2 | 50 | 12.23 | ES- | 1 |
| 517 | PS 20:0-22:1 | 872.6 | 30 | 337.2 | 50 | 12.23 | ES- | 2 |
| 518 | PS 20:0-22:2 | 870.6 | 30 | 311.2 | 50 | 12.23 | ES- | 1 |
| 519 | PS 20:0-22:2 | 870.6 | 30 | 335.2 | 50 | 12.23 | ES- | 2 |
| 520 | PS 20:0-22:3 | 868.6 | 30 | 311.2 | 50 | 12.23 | ES- | 1 |
| 521 | PS 20:0-22:3 | 868.6 | 30 | 333.2 | 50 | 12.23 | ES- | 2 |
| 522 | PS 20:0-22:4 | 866.6 | 30 | 311.2 | 50 | 12.23 | ES- | 1 |
| 523 | PS 20:0-22:4 | 866.6 | 30 | 331.2 | 50 | 12.23 | ES- | 2 |
| 524 | PS 20:0-22:5 | 864.6 | 30 | 311.2 | 50 | 12.23 | ES- | 1 |
| 525 | PS 20:0-22:5 | 864.6 | 30 | 329.2 | 50 | 12.23 | ES- | 2 |
| 526 | PS 20:0-22:6 | 862.6 | 30 | 311.2 | 50 | 12.23 | ES- | 1 |
| 527 | PS 20:0-22:6 | 862.6 | 30 | 327.2 | 50 | 12.23 | ES- | 2 |
| 528 | PS 20:1-20:1 | 842.6 | 30 | 309.2 | 50 | 12.23 | ES- | 1 |
| 529 | PS 20:1-20:2 | 840.6 | 30 | 307.2 | 50 | 12.23 | ES- | 1 |
| 530 | PS 20:1-20:2 | 840.6 | 30 | 309.2 | 50 | 12.23 | ES- | 2 |
| 531 | PS 20:1-20:3 | 838.6 | 30 | 305.2 | 50 | 12.23 | ES- | 1 |
| 532 | PS 20:1-20:3 | 838.6 | 30 | 309.2 | 50 | 12.23 | ES- | 2 |
| 533 | PS 20:1-20:4 | 836.5 | 30 | 303.2 | 50 | 12.23 | ES- | 1 |
| 534 | PS 20:1-20:4 | 836.5 | 30 | 309.2 | 50 | 12.23 | ES- | 2 |
| 535 | PS 20:1-20:5 | 834.5 | 30 | 301.2 | 50 | 12.23 | ES- | 1 |

|     |              |       |    |       |    |       |     |   |
|-----|--------------|-------|----|-------|----|-------|-----|---|
| 536 | PS 20:1-20:5 | 834.5 | 30 | 309.2 | 50 | 12.23 | ES- | 2 |
| 537 | PS 20:1-22:0 | 872.6 | 30 | 309.2 | 50 | 12.23 | ES- | 1 |
| 538 | PS 20:1-22:0 | 872.6 | 30 | 339.2 | 50 | 12.23 | ES- | 2 |
| 539 | PS 20:1-22:1 | 870.6 | 30 | 309.2 | 50 | 12.23 | ES- | 1 |
| 540 | PS 20:1-22:1 | 870.6 | 30 | 337.2 | 50 | 12.23 | ES- | 2 |
| 541 | PS 20:1-22:2 | 868.6 | 30 | 309.2 | 50 | 12.23 | ES- | 1 |
| 542 | PS 20:1-22:2 | 868.6 | 30 | 335.2 | 50 | 12.23 | ES- | 2 |
| 543 | PS 20:1-22:3 | 866.6 | 30 | 309.2 | 50 | 12.23 | ES- | 1 |
| 544 | PS 20:1-22:3 | 866.6 | 30 | 333.2 | 50 | 12.23 | ES- | 2 |
| 545 | PS 20:1-22:4 | 864.6 | 30 | 309.2 | 50 | 12.23 | ES- | 1 |
| 546 | PS 20:1-22:4 | 864.6 | 30 | 331.2 | 50 | 12.23 | ES- | 2 |
| 547 | PS 20:1-22:5 | 862.6 | 30 | 309.2 | 50 | 12.23 | ES- | 1 |
| 548 | PS 20:1-22:5 | 862.6 | 30 | 329.2 | 50 | 12.23 | ES- | 2 |
| 549 | PS 20:1-22:6 | 860.5 | 30 | 309.2 | 50 | 12.23 | ES- | 1 |
| 550 | PS 20:1-22:6 | 860.5 | 30 | 327.2 | 50 | 12.23 | ES- | 2 |
| 551 | PS 20:2-20:2 | 838.6 | 30 | 307.2 | 50 | 12.23 | ES- | 1 |
| 552 | PS 20:2-20:3 | 836.5 | 30 | 305.2 | 50 | 12.23 | ES- | 1 |
| 553 | PS 20:2-20:3 | 836.5 | 30 | 307.2 | 50 | 12.23 | ES- | 2 |
| 554 | PS 20:2-20:4 | 834.5 | 30 | 303.2 | 50 | 12.23 | ES- | 1 |
| 555 | PS 20:2-20:4 | 834.5 | 30 | 307.2 | 50 | 12.23 | ES- | 2 |
| 556 | PS 20:2-20:5 | 832.5 | 30 | 301.2 | 50 | 12.23 | ES- | 1 |
| 557 | PS 20:2-20:5 | 832.5 | 30 | 307.2 | 50 | 12.23 | ES- | 2 |
| 558 | PS 20:2-22:0 | 870.6 | 30 | 307.2 | 50 | 12.23 | ES- | 1 |
| 559 | PS 20:2-22:0 | 870.6 | 30 | 339.2 | 50 | 12.23 | ES- | 2 |
| 560 | PS 20:2-22:1 | 868.6 | 30 | 307.2 | 50 | 12.23 | ES- | 1 |
| 561 | PS 20:2-22:1 | 868.6 | 30 | 337.2 | 50 | 12.23 | ES- | 2 |
| 562 | PS 20:2-22:2 | 866.6 | 30 | 307.2 | 50 | 12.23 | ES- | 1 |
| 563 | PS 20:2-22:2 | 866.6 | 30 | 335.2 | 50 | 12.23 | ES- | 2 |
| 564 | PS 20:2-22:3 | 864.6 | 30 | 307.2 | 50 | 12.23 | ES- | 1 |
| 565 | PS 20:2-22:3 | 864.6 | 30 | 333.2 | 50 | 12.23 | ES- | 2 |
| 566 | PS 20:2-22:4 | 862.6 | 30 | 307.2 | 50 | 12.23 | ES- | 1 |
| 567 | PS 20:2-22:4 | 862.6 | 30 | 331.2 | 50 | 12.23 | ES- | 2 |
| 568 | PS 20:2-22:5 | 860.5 | 30 | 307.2 | 50 | 12.23 | ES- | 1 |
| 569 | PS 20:2-22:5 | 860.5 | 30 | 329.2 | 50 | 12.23 | ES- | 2 |
| 570 | PS 20:2-22:6 | 858.5 | 30 | 307.2 | 50 | 12.23 | ES- | 1 |

|     |              |       |    |       |    |       |     |   |
|-----|--------------|-------|----|-------|----|-------|-----|---|
| 571 | PS 20:2-22:6 | 858.5 | 30 | 327.2 | 50 | 12.23 | ES- | 2 |
| 572 | PS 20:3-20:3 | 834.5 | 30 | 305.2 | 50 | 12.23 | ES- | 1 |
| 573 | PS 20:3-20:4 | 832.5 | 30 | 303.2 | 50 | 12.23 | ES- | 1 |
| 574 | PS 20:3-20:4 | 832.5 | 30 | 305.2 | 50 | 12.23 | ES- | 2 |
| 575 | PS 20:3-20:5 | 830.5 | 30 | 301.2 | 50 | 12.23 | ES- | 1 |
| 576 | PS 20:3-20:5 | 830.5 | 30 | 305.2 | 50 | 12.23 | ES- | 2 |

Method 12: PC, PE, PG, and PS (4)

| No | Name         | Precursor | CV (V) | Product | CE (V) | RT setting (min) | IonMode | Ion |
|----|--------------|-----------|--------|---------|--------|------------------|---------|-----|
| 1  | PC 20:3-22:0 | 926.7     | 15     | 305.2   | 40     | 5.46             | ES-     | 1   |
| 2  | PC 20:3-22:0 | 926.7     | 15     | 339.2   | 40     | 5.46             | ES-     | 2   |
| 3  | PC 20:3-22:1 | 924.7     | 15     | 305.2   | 40     | 5.46             | ES-     | 1   |
| 4  | PC 20:3-22:1 | 924.7     | 15     | 337.2   | 40     | 5.46             | ES-     | 2   |
| 5  | PC 20:3-22:2 | 922.7     | 15     | 305.2   | 40     | 5.46             | ES-     | 1   |
| 6  | PC 20:3-22:2 | 922.7     | 15     | 335.2   | 40     | 5.46             | ES-     | 2   |
| 7  | PC 20:3-22:3 | 920.6     | 15     | 305.2   | 40     | 5.46             | ES-     | 1   |
| 8  | PC 20:3-22:3 | 920.6     | 15     | 333.2   | 40     | 5.46             | ES-     | 2   |
| 9  | PC 20:3-22:4 | 918.6     | 15     | 305.2   | 40     | 5.46             | ES-     | 1   |
| 10 | PC 20:3-22:4 | 918.6     | 15     | 331.2   | 40     | 5.46             | ES-     | 2   |
| 11 | PC 20:3-22:5 | 916.6     | 15     | 305.2   | 40     | 5.46             | ES-     | 1   |
| 12 | PC 20:3-22:5 | 916.6     | 15     | 329.2   | 40     | 5.46             | ES-     | 2   |
| 13 | PC 20:3-22:6 | 914.6     | 15     | 305.2   | 40     | 5.46             | ES-     | 1   |
| 14 | PC 20:3-22:6 | 914.6     | 15     | 327.2   | 40     | 5.46             | ES-     | 2   |
| 15 | PC 20:4-20:4 | 888.6     | 15     | 303.2   | 40     | 5.46             | ES-     | 1   |
| 16 | PC 20:4-20:5 | 886.6     | 15     | 301.2   | 40     | 5.46             | ES-     | 1   |
| 17 | PC 20:4-20:5 | 886.6     | 15     | 303.2   | 40     | 5.46             | ES-     | 2   |
| 18 | PC 20:4-22:0 | 924.7     | 15     | 303.2   | 40     | 5.46             | ES-     | 1   |
| 19 | PC 20:4-22:0 | 924.7     | 15     | 339.2   | 40     | 5.46             | ES-     | 2   |
| 20 | PC 20:4-22:1 | 922.7     | 15     | 303.2   | 40     | 5.46             | ES-     | 1   |
| 21 | PC 20:4-22:1 | 922.7     | 15     | 337.2   | 40     | 5.46             | ES-     | 2   |
| 22 | PC 20:4-22:2 | 920.6     | 15     | 303.2   | 40     | 5.46             | ES-     | 1   |
| 23 | PC 20:4-22:2 | 920.6     | 15     | 335.2   | 40     | 5.46             | ES-     | 2   |
| 24 | PC 20:4-22:3 | 918.6     | 15     | 303.2   | 40     | 5.46             | ES-     | 1   |
| 25 | PC 20:4-22:3 | 918.6     | 15     | 333.2   | 40     | 5.46             | ES-     | 2   |
| 26 | PC 20:4-22:4 | 916.6     | 15     | 303.2   | 40     | 5.46             | ES-     | 1   |
| 27 | PC 20:4-22:4 | 916.6     | 15     | 331.2   | 40     | 5.46             | ES-     | 2   |



|    |              |       |    |       |    |      |     |   |
|----|--------------|-------|----|-------|----|------|-----|---|
| 28 | PC 20:4-22:5 | 914.6 | 15 | 303.2 | 40 | 5.46 | ES- | 1 |
| 29 | PC 20:4-22:5 | 914.6 | 15 | 329.2 | 40 | 5.46 | ES- | 2 |
| 30 | PC 20:4-22:6 | 912.6 | 15 | 303.2 | 40 | 5.46 | ES- | 1 |
| 31 | PC 20:4-22:6 | 912.6 | 15 | 327.2 | 40 | 5.46 | ES- | 2 |
| 32 | PC 20:5-20:5 | 884.5 | 15 | 301.2 | 40 | 5.46 | ES- | 1 |
| 33 | PC 20:5-22:0 | 922.7 | 15 | 301.2 | 40 | 5.46 | ES- | 1 |
| 34 | PC 20:5-22:0 | 922.7 | 15 | 339.2 | 40 | 5.46 | ES- | 2 |
| 35 | PC 20:5-22:1 | 920.6 | 15 | 301.2 | 40 | 5.46 | ES- | 1 |
| 36 | PC 20:5-22:1 | 920.6 | 15 | 337.2 | 40 | 5.46 | ES- | 2 |
| 37 | PC 20:5-22:2 | 918.6 | 15 | 301.2 | 40 | 5.46 | ES- | 1 |
| 38 | PC 20:5-22:2 | 918.6 | 15 | 335.2 | 40 | 5.46 | ES- | 2 |
| 39 | PC 20:5-22:3 | 916.6 | 15 | 301.2 | 40 | 5.46 | ES- | 1 |
| 40 | PC 20:5-22:3 | 916.6 | 15 | 333.2 | 40 | 5.46 | ES- | 2 |
| 41 | PC 20:5-22:4 | 914.6 | 15 | 301.2 | 40 | 5.46 | ES- | 1 |
| 42 | PC 20:5-22:4 | 914.6 | 15 | 331.2 | 40 | 5.46 | ES- | 2 |
| 43 | PC 20:5-22:5 | 912.6 | 15 | 301.2 | 40 | 5.46 | ES- | 1 |
| 44 | PC 20:5-22:5 | 912.6 | 15 | 329.2 | 40 | 5.46 | ES- | 2 |
| 45 | PC 20:5-22:6 | 910.6 | 15 | 301.2 | 40 | 5.46 | ES- | 1 |
| 46 | PC 20:5-22:6 | 910.6 | 15 | 327.2 | 40 | 5.46 | ES- | 2 |
| 47 | PC 22:0-22:0 | 960.8 | 15 | 339.2 | 40 | 5.46 | ES- | 1 |
| 48 | PC 22:0-22:1 | 958.7 | 15 | 337.2 | 40 | 5.46 | ES- | 1 |
| 49 | PC 22:0-22:1 | 958.7 | 15 | 339.2 | 40 | 5.46 | ES- | 2 |
| 50 | PC 22:0-22:2 | 956.7 | 15 | 335.2 | 40 | 5.46 | ES- | 1 |
| 51 | PC 22:0-22:2 | 956.7 | 15 | 339.2 | 40 | 5.46 | ES- | 2 |
| 52 | PC 22:0-22:3 | 954.7 | 15 | 333.2 | 40 | 5.46 | ES- | 1 |
| 53 | PC 22:0-22:3 | 954.7 | 15 | 339.2 | 40 | 5.46 | ES- | 2 |
| 54 | PC 22:0-22:4 | 952.7 | 15 | 331.2 | 40 | 5.46 | ES- | 1 |
| 55 | PC 22:0-22:4 | 952.7 | 15 | 339.2 | 40 | 5.46 | ES- | 2 |
| 56 | PC 22:0-22:5 | 950.7 | 15 | 329.2 | 40 | 5.46 | ES- | 1 |
| 57 | PC 22:0-22:5 | 950.7 | 15 | 339.2 | 40 | 5.46 | ES- | 2 |
| 58 | PC 22:0-22:6 | 948.7 | 15 | 327.2 | 40 | 5.46 | ES- | 1 |
| 59 | PC 22:0-22:6 | 948.7 | 15 | 339.2 | 40 | 5.46 | ES- | 2 |
| 60 | PC 22:1-22:1 | 956.7 | 15 | 337.2 | 40 | 5.46 | ES- | 1 |
| 61 | PC 22:1-22:2 | 954.7 | 15 | 335.2 | 40 | 5.46 | ES- | 1 |
| 62 | PC 22:1-22:2 | 954.7 | 15 | 337.2 | 40 | 5.46 | ES- | 2 |

|    |              |       |    |       |    |      |     |   |
|----|--------------|-------|----|-------|----|------|-----|---|
| 63 | PC 22:1-22:3 | 952.7 | 15 | 333.2 | 40 | 5.46 | ES- | 1 |
| 64 | PC 22:1-22:3 | 952.7 | 15 | 337.2 | 40 | 5.46 | ES- | 2 |
| 65 | PC 22:1-22:4 | 950.7 | 15 | 331.2 | 40 | 5.46 | ES- | 1 |
| 66 | PC 22:1-22:4 | 950.7 | 15 | 337.2 | 40 | 5.46 | ES- | 2 |
| 67 | PC 22:1-22:5 | 948.7 | 15 | 329.2 | 40 | 5.46 | ES- | 1 |
| 68 | PC 22:1-22:5 | 948.7 | 15 | 337.2 | 40 | 5.46 | ES- | 2 |
| 69 | PC 22:1-22:6 | 946.7 | 15 | 327.2 | 40 | 5.46 | ES- | 1 |
| 70 | PC 22:1-22:6 | 946.7 | 15 | 337.2 | 40 | 5.46 | ES- | 2 |
| 71 | PC 22:2-22:2 | 952.7 | 15 | 335.2 | 40 | 5.46 | ES- | 1 |
| 72 | PC 22:2-22:3 | 950.7 | 15 | 333.2 | 40 | 5.46 | ES- | 1 |
| 73 | PC 22:2-22:3 | 950.7 | 15 | 335.2 | 40 | 5.46 | ES- | 2 |
| 74 | PC 22:2-22:4 | 948.7 | 15 | 331.2 | 40 | 5.46 | ES- | 1 |
| 75 | PC 22:2-22:4 | 948.7 | 15 | 335.2 | 40 | 5.46 | ES- | 2 |
| 76 | PC 22:2-22:5 | 946.7 | 15 | 329.2 | 40 | 5.46 | ES- | 1 |
| 77 | PC 22:2-22:5 | 946.7 | 15 | 335.2 | 40 | 5.46 | ES- | 2 |
| 78 | PC 22:2-22:6 | 944.6 | 15 | 327.2 | 40 | 5.46 | ES- | 1 |
| 79 | PC 22:2-22:6 | 944.6 | 15 | 335.2 | 40 | 5.46 | ES- | 2 |
| 80 | PC 22:3-22:3 | 948.7 | 15 | 333.2 | 40 | 5.46 | ES- | 1 |
| 81 | PC 22:3-22:4 | 946.7 | 15 | 331.2 | 40 | 5.46 | ES- | 1 |
| 82 | PC 22:3-22:4 | 946.7 | 15 | 333.2 | 40 | 5.46 | ES- | 2 |
| 83 | PC 22:3-22:5 | 944.6 | 15 | 329.2 | 40 | 5.46 | ES- | 1 |
| 84 | PC 22:3-22:5 | 944.6 | 15 | 333.2 | 40 | 5.46 | ES- | 2 |
| 85 | PC 22:3-22:6 | 942.6 | 15 | 327.2 | 40 | 5.46 | ES- | 1 |
| 86 | PC 22:3-22:6 | 942.6 | 15 | 333.2 | 40 | 5.46 | ES- | 2 |
| 87 | PC 22:4-22:4 | 944.6 | 15 | 331.2 | 40 | 5.46 | ES- | 1 |
| 88 | PC 22:4-22:5 | 942.6 | 15 | 329.2 | 40 | 5.46 | ES- | 1 |
| 89 | PC 22:4-22:5 | 942.6 | 15 | 331.2 | 40 | 5.46 | ES- | 2 |
| 90 | PC 22:4-22:6 | 940.6 | 15 | 327.2 | 40 | 5.46 | ES- | 1 |
| 91 | PC 22:4-22:6 | 940.6 | 15 | 331.2 | 40 | 5.46 | ES- | 2 |
| 92 | PC 22:5-22:5 | 940.6 | 15 | 329.2 | 40 | 5.46 | ES- | 1 |
| 93 | PC 22:5-22:6 | 938.6 | 15 | 327.2 | 40 | 5.46 | ES- | 1 |
| 94 | PC 22:5-22:6 | 938.6 | 15 | 329.2 | 40 | 5.46 | ES- | 2 |
| 95 | PC 22:6-22:6 | 936.6 | 15 | 327.2 | 40 | 5.46 | ES- | 1 |
| 96 | PE 20:3-22:0 | 824.6 | 50 | 305.2 | 25 | 6.32 | ES- | 1 |
| 97 | PE 20:3-22:0 | 824.6 | 50 | 339.2 | 25 | 6.32 | ES- | 2 |

|     |              |       |    |       |    |      |     |   |
|-----|--------------|-------|----|-------|----|------|-----|---|
| 98  | PE 20:3-22:1 | 822.6 | 50 | 305.2 | 25 | 6.32 | ES- | 1 |
| 99  | PE 20:3-22:1 | 822.6 | 50 | 337.2 | 25 | 6.32 | ES- | 2 |
| 100 | PE 20:3-22:2 | 820.6 | 50 | 305.2 | 25 | 6.32 | ES- | 1 |
| 101 | PE 20:3-22:2 | 820.6 | 50 | 335.2 | 25 | 6.32 | ES- | 2 |
| 102 | PE 20:3-22:3 | 818.6 | 50 | 305.2 | 25 | 6.32 | ES- | 1 |
| 103 | PE 20:3-22:3 | 818.6 | 50 | 333.2 | 25 | 6.32 | ES- | 2 |
| 104 | PE 20:3-22:4 | 816.6 | 50 | 305.2 | 25 | 6.32 | ES- | 1 |
| 105 | PE 20:3-22:4 | 816.6 | 50 | 331.2 | 25 | 6.32 | ES- | 2 |
| 106 | PE 20:3-22:5 | 814.5 | 50 | 305.2 | 25 | 6.32 | ES- | 1 |
| 107 | PE 20:3-22:5 | 814.5 | 50 | 329.2 | 25 | 6.32 | ES- | 2 |
| 108 | PE 20:3-22:6 | 812.5 | 50 | 305.2 | 25 | 6.32 | ES- | 1 |
| 109 | PE 20:3-22:6 | 812.5 | 50 | 327.2 | 25 | 6.32 | ES- | 2 |
| 110 | PE 20:4-20:4 | 786.5 | 50 | 303.2 | 25 | 6.32 | ES- | 1 |
| 111 | PE 20:4-20:5 | 784.5 | 50 | 301.2 | 25 | 6.32 | ES- | 1 |
| 112 | PE 20:4-20:5 | 784.5 | 50 | 303.2 | 25 | 6.32 | ES- | 2 |
| 113 | PE 20:4-22:0 | 822.6 | 50 | 303.2 | 25 | 6.32 | ES- | 1 |
| 114 | PE 20:4-22:0 | 822.6 | 50 | 339.2 | 25 | 6.32 | ES- | 2 |
| 115 | PE 20:4-22:1 | 820.6 | 50 | 303.2 | 25 | 6.32 | ES- | 1 |
| 116 | PE 20:4-22:1 | 820.6 | 50 | 337.2 | 25 | 6.32 | ES- | 2 |
| 117 | PE 20:4-22:2 | 818.6 | 50 | 303.2 | 25 | 6.32 | ES- | 1 |
| 118 | PE 20:4-22:2 | 818.6 | 50 | 335.2 | 25 | 6.32 | ES- | 2 |
| 119 | PE 20:4-22:3 | 816.6 | 50 | 303.2 | 25 | 6.32 | ES- | 1 |
| 120 | PE 20:4-22:3 | 816.6 | 50 | 333.2 | 25 | 6.32 | ES- | 2 |
| 121 | PE 20:4-22:4 | 814.5 | 50 | 303.2 | 25 | 6.32 | ES- | 1 |
| 122 | PE 20:4-22:4 | 814.5 | 50 | 331.2 | 25 | 6.32 | ES- | 2 |
| 123 | PE 20:4-22:5 | 812.5 | 50 | 303.2 | 25 | 6.32 | ES- | 1 |
| 124 | PE 20:4-22:5 | 812.5 | 50 | 329.2 | 25 | 6.32 | ES- | 2 |
| 125 | PE 20:4-22:6 | 810.5 | 50 | 303.2 | 25 | 6.32 | ES- | 1 |
| 126 | PE 20:4-22:6 | 810.5 | 50 | 327.2 | 25 | 6.32 | ES- | 2 |
| 127 | PE 20:5-20:5 | 782.5 | 50 | 301.2 | 25 | 6.32 | ES- | 1 |
| 128 | PE 20:5-22:0 | 820.6 | 50 | 301.2 | 25 | 6.32 | ES- | 1 |
| 129 | PE 20:5-22:0 | 820.6 | 50 | 339.2 | 25 | 6.32 | ES- | 2 |
| 130 | PE 20:5-22:1 | 818.6 | 50 | 301.2 | 25 | 6.32 | ES- | 1 |
| 131 | PE 20:5-22:1 | 818.6 | 50 | 337.2 | 25 | 6.32 | ES- | 2 |
| 132 | PE 20:5-22:2 | 816.6 | 50 | 301.2 | 25 | 6.32 | ES- | 1 |

|     |              |       |    |       |    |      |     |   |
|-----|--------------|-------|----|-------|----|------|-----|---|
| 133 | PE 20:5-22:2 | 816.6 | 50 | 335.2 | 25 | 6.32 | ES- | 2 |
| 134 | PE 20:5-22:3 | 814.5 | 50 | 301.2 | 25 | 6.32 | ES- | 1 |
| 135 | PE 20:5-22:3 | 814.5 | 50 | 333.2 | 25 | 6.32 | ES- | 2 |
| 136 | PE 20:5-22:4 | 812.5 | 50 | 301.2 | 25 | 6.32 | ES- | 1 |
| 137 | PE 20:5-22:4 | 812.5 | 50 | 331.2 | 25 | 6.32 | ES- | 2 |
| 138 | PE 20:5-22:5 | 810.5 | 50 | 301.2 | 25 | 6.32 | ES- | 1 |
| 139 | PE 20:5-22:5 | 810.5 | 50 | 329.2 | 25 | 6.32 | ES- | 2 |
| 140 | PE 20:5-22:6 | 808.5 | 50 | 301.2 | 25 | 6.32 | ES- | 1 |
| 141 | PE 20:5-22:6 | 808.5 | 50 | 327.2 | 25 | 6.32 | ES- | 2 |
| 142 | PE 22:0-22:0 | 858.7 | 50 | 339.2 | 25 | 6.32 | ES- | 1 |
| 143 | PE 22:0-22:1 | 856.7 | 50 | 337.2 | 25 | 6.32 | ES- | 1 |
| 144 | PE 22:0-22:1 | 856.7 | 50 | 339.2 | 25 | 6.32 | ES- | 2 |
| 145 | PE 22:0-22:2 | 854.7 | 50 | 335.2 | 25 | 6.32 | ES- | 1 |
| 146 | PE 22:0-22:2 | 854.7 | 50 | 339.2 | 25 | 6.32 | ES- | 2 |
| 147 | PE 22:0-22:3 | 852.6 | 50 | 333.2 | 25 | 6.32 | ES- | 1 |
| 148 | PE 22:0-22:3 | 852.6 | 50 | 339.2 | 25 | 6.32 | ES- | 2 |
| 149 | PE 22:0-22:4 | 850.6 | 50 | 331.2 | 25 | 6.32 | ES- | 1 |
| 150 | PE 22:0-22:4 | 850.6 | 50 | 339.2 | 25 | 6.32 | ES- | 2 |
| 151 | PE 22:0-22:5 | 848.6 | 50 | 329.2 | 25 | 6.32 | ES- | 1 |
| 152 | PE 22:0-22:5 | 848.6 | 50 | 339.2 | 25 | 6.32 | ES- | 2 |
| 153 | PE 22:0-22:6 | 846.6 | 50 | 327.2 | 25 | 6.32 | ES- | 1 |
| 154 | PE 22:0-22:6 | 846.6 | 50 | 339.2 | 25 | 6.32 | ES- | 2 |
| 155 | PE 22:1-22:1 | 854.7 | 50 | 337.2 | 25 | 6.32 | ES- | 1 |
| 156 | PE 22:1-22:2 | 852.6 | 50 | 335.2 | 25 | 6.32 | ES- | 1 |
| 157 | PE 22:1-22:2 | 852.6 | 50 | 337.2 | 25 | 6.32 | ES- | 2 |
| 158 | PE 22:1-22:3 | 850.6 | 50 | 333.2 | 25 | 6.32 | ES- | 1 |
| 159 | PE 22:1-22:3 | 850.6 | 50 | 337.2 | 25 | 6.32 | ES- | 2 |
| 160 | PE 22:1-22:4 | 848.6 | 50 | 331.2 | 25 | 6.32 | ES- | 1 |
| 161 | PE 22:1-22:4 | 848.6 | 50 | 337.2 | 25 | 6.32 | ES- | 2 |
| 162 | PE 22:1-22:5 | 846.6 | 50 | 329.2 | 25 | 6.32 | ES- | 1 |
| 163 | PE 22:1-22:5 | 846.6 | 50 | 337.2 | 25 | 6.32 | ES- | 2 |
| 164 | PE 22:1-22:6 | 844.6 | 50 | 327.2 | 25 | 6.32 | ES- | 1 |
| 165 | PE 22:1-22:6 | 844.6 | 50 | 337.2 | 25 | 6.32 | ES- | 2 |
| 166 | PE 22:2-22:2 | 850.6 | 50 | 335.2 | 25 | 6.32 | ES- | 1 |
| 167 | PE 22:2-22:3 | 848.6 | 50 | 333.2 | 25 | 6.32 | ES- | 1 |

|     |              |       |    |       |    |      |     |   |
|-----|--------------|-------|----|-------|----|------|-----|---|
| 168 | PE 22:2-22:3 | 848.6 | 50 | 335.2 | 25 | 6.32 | ES- | 2 |
| 169 | PE 22:2-22:4 | 846.6 | 50 | 331.2 | 25 | 6.32 | ES- | 1 |
| 170 | PE 22:2-22:4 | 846.6 | 50 | 335.2 | 25 | 6.32 | ES- | 2 |
| 171 | PE 22:2-22:5 | 844.6 | 50 | 329.2 | 25 | 6.32 | ES- | 1 |
| 172 | PE 22:2-22:5 | 844.6 | 50 | 335.2 | 25 | 6.32 | ES- | 2 |
| 173 | PE 22:2-22:6 | 842.6 | 50 | 327.2 | 25 | 6.32 | ES- | 1 |
| 174 | PE 22:2-22:6 | 842.6 | 50 | 335.2 | 25 | 6.32 | ES- | 2 |
| 175 | PE 22:3-22:3 | 846.6 | 50 | 333.2 | 25 | 6.32 | ES- | 1 |
| 176 | PE 22:3-22:4 | 844.6 | 50 | 331.2 | 25 | 6.32 | ES- | 1 |
| 177 | PE 22:3-22:4 | 844.6 | 50 | 333.2 | 25 | 6.32 | ES- | 2 |
| 178 | PE 22:3-22:5 | 842.6 | 50 | 329.2 | 25 | 6.32 | ES- | 1 |
| 179 | PE 22:3-22:5 | 842.6 | 50 | 333.2 | 25 | 6.32 | ES- | 2 |
| 180 | PE 22:3-22:6 | 840.6 | 50 | 327.2 | 25 | 6.32 | ES- | 1 |
| 181 | PE 22:3-22:6 | 840.6 | 50 | 333.2 | 25 | 6.32 | ES- | 2 |
| 182 | PE 22:4-22:4 | 842.6 | 50 | 331.2 | 25 | 6.32 | ES- | 1 |
| 183 | PE 22:4-22:5 | 840.6 | 50 | 329.2 | 25 | 6.32 | ES- | 1 |
| 184 | PE 22:4-22:5 | 840.6 | 50 | 331.2 | 25 | 6.32 | ES- | 2 |
| 185 | PE 22:4-22:6 | 838.5 | 50 | 327.2 | 25 | 6.32 | ES- | 1 |
| 186 | PE 22:4-22:6 | 838.5 | 50 | 331.2 | 25 | 6.32 | ES- | 2 |
| 187 | PE 22:5-22:5 | 838.5 | 50 | 329.2 | 25 | 6.32 | ES- | 1 |
| 188 | PE 22:5-22:6 | 836.5 | 50 | 327.2 | 25 | 6.32 | ES- | 1 |
| 189 | PE 22:5-22:6 | 836.5 | 50 | 329.2 | 25 | 6.32 | ES- | 2 |
| 190 | PE 22:6-22:6 | 834.5 | 50 | 327.2 | 25 | 6.32 | ES- | 1 |
| 191 | PG 20:3-22:0 | 855.6 | 30 | 305.2 | 40 | 8.99 | ES- | 1 |
| 192 | PG 20:3-22:0 | 855.6 | 30 | 339.2 | 40 | 8.99 | ES- | 2 |
| 193 | PG 20:3-22:1 | 853.6 | 30 | 305.2 | 40 | 8.99 | ES- | 1 |
| 194 | PG 20:3-22:1 | 853.6 | 30 | 337.2 | 40 | 8.99 | ES- | 2 |
| 195 | PG 20:3-22:2 | 851.6 | 30 | 305.2 | 40 | 8.99 | ES- | 1 |
| 196 | PG 20:3-22:2 | 851.6 | 30 | 335.2 | 40 | 8.99 | ES- | 2 |
| 197 | PG 20:3-22:3 | 849.6 | 30 | 305.2 | 40 | 8.99 | ES- | 1 |
| 198 | PG 20:3-22:3 | 849.6 | 30 | 333.2 | 40 | 8.99 | ES- | 2 |
| 199 | PG 20:3-22:4 | 847.5 | 30 | 305.2 | 40 | 8.99 | ES- | 1 |
| 200 | PG 20:3-22:4 | 847.5 | 30 | 331.2 | 40 | 8.99 | ES- | 2 |
| 201 | PG 20:3-22:5 | 845.5 | 30 | 305.2 | 40 | 8.99 | ES- | 1 |
| 202 | PG 20:3-22:5 | 845.5 | 30 | 329.2 | 40 | 8.99 | ES- | 2 |

|     |              |       |    |       |    |      |     |   |
|-----|--------------|-------|----|-------|----|------|-----|---|
| 203 | PG 20:3-22:6 | 843.5 | 30 | 305.2 | 40 | 8.99 | ES- | 1 |
| 204 | PG 20:3-22:6 | 843.5 | 30 | 327.2 | 40 | 8.99 | ES- | 2 |
| 205 | PG 20:4-20:4 | 817.5 | 30 | 303.2 | 40 | 8.99 | ES- | 1 |
| 206 | PG 20:4-20:5 | 815.5 | 30 | 301.2 | 40 | 8.99 | ES- | 1 |
| 207 | PG 20:4-20:5 | 815.5 | 30 | 303.2 | 40 | 8.99 | ES- | 2 |
| 208 | PG 20:4-22:0 | 853.6 | 30 | 303.2 | 40 | 8.99 | ES- | 1 |
| 209 | PG 20:4-22:0 | 853.6 | 30 | 339.2 | 40 | 8.99 | ES- | 2 |
| 210 | PG 20:4-22:1 | 851.6 | 30 | 303.2 | 40 | 8.99 | ES- | 1 |
| 211 | PG 20:4-22:1 | 851.6 | 30 | 337.2 | 40 | 8.99 | ES- | 2 |
| 212 | PG 20:4-22:2 | 849.6 | 30 | 303.2 | 40 | 8.99 | ES- | 1 |
| 213 | PG 20:4-22:2 | 849.6 | 30 | 335.2 | 40 | 8.99 | ES- | 2 |
| 214 | PG 20:4-22:3 | 847.5 | 30 | 303.2 | 40 | 8.99 | ES- | 1 |
| 215 | PG 20:4-22:3 | 847.5 | 30 | 333.2 | 40 | 8.99 | ES- | 2 |
| 216 | PG 20:4-22:4 | 845.5 | 30 | 303.2 | 40 | 8.99 | ES- | 1 |
| 217 | PG 20:4-22:4 | 845.5 | 30 | 331.2 | 40 | 8.99 | ES- | 2 |
| 218 | PG 20:4-22:5 | 843.5 | 30 | 303.2 | 40 | 8.99 | ES- | 1 |
| 219 | PG 20:4-22:5 | 843.5 | 30 | 329.2 | 40 | 8.99 | ES- | 2 |
| 220 | PG 20:4-22:6 | 841.5 | 30 | 303.2 | 40 | 8.99 | ES- | 1 |
| 221 | PG 20:4-22:6 | 841.5 | 30 | 327.2 | 40 | 8.99 | ES- | 2 |
| 222 | PG 20:5-20:5 | 813.5 | 30 | 301.2 | 40 | 8.99 | ES- | 1 |
| 223 | PG 20:5-22:0 | 851.6 | 30 | 301.2 | 40 | 8.99 | ES- | 1 |
| 224 | PG 20:5-22:0 | 851.6 | 30 | 339.2 | 40 | 8.99 | ES- | 2 |
| 225 | PG 20:5-22:1 | 849.6 | 30 | 301.2 | 40 | 8.99 | ES- | 1 |
| 226 | PG 20:5-22:1 | 849.6 | 30 | 337.2 | 40 | 8.99 | ES- | 2 |
| 227 | PG 20:5-22:2 | 847.5 | 30 | 301.2 | 40 | 8.99 | ES- | 1 |
| 228 | PG 20:5-22:2 | 847.5 | 30 | 335.2 | 40 | 8.99 | ES- | 2 |
| 229 | PG 20:5-22:3 | 845.5 | 30 | 301.2 | 40 | 8.99 | ES- | 1 |
| 230 | PG 20:5-22:3 | 845.5 | 30 | 333.2 | 40 | 8.99 | ES- | 2 |
| 231 | PG 20:5-22:4 | 843.5 | 30 | 301.2 | 40 | 8.99 | ES- | 1 |
| 232 | PG 20:5-22:4 | 843.5 | 30 | 331.2 | 40 | 8.99 | ES- | 2 |
| 233 | PG 20:5-22:5 | 841.5 | 30 | 301.2 | 40 | 8.99 | ES- | 1 |
| 234 | PG 20:5-22:5 | 841.5 | 30 | 329.2 | 40 | 8.99 | ES- | 2 |
| 235 | PG 20:5-22:6 | 839.5 | 30 | 301.2 | 40 | 8.99 | ES- | 1 |
| 236 | PG 20:5-22:6 | 839.5 | 30 | 327.2 | 40 | 8.99 | ES- | 2 |
| 237 | PG 22:0-22:0 | 889.7 | 30 | 339.2 | 40 | 8.99 | ES- | 1 |

|     |              |       |    |       |    |      |     |   |
|-----|--------------|-------|----|-------|----|------|-----|---|
| 238 | PG 22:0-22:1 | 887.7 | 30 | 337.2 | 40 | 8.99 | ES- | 1 |
| 239 | PG 22:0-22:1 | 887.7 | 30 | 339.2 | 40 | 8.99 | ES- | 2 |
| 240 | PG 22:0-22:2 | 885.7 | 30 | 335.2 | 40 | 8.99 | ES- | 1 |
| 241 | PG 22:0-22:2 | 885.7 | 30 | 339.2 | 40 | 8.99 | ES- | 2 |
| 242 | PG 22:0-22:3 | 883.6 | 30 | 333.2 | 40 | 8.99 | ES- | 1 |
| 243 | PG 22:0-22:3 | 883.6 | 30 | 339.2 | 40 | 8.99 | ES- | 2 |
| 244 | PG 22:0-22:4 | 881.6 | 30 | 331.2 | 40 | 8.99 | ES- | 1 |
| 245 | PG 22:0-22:4 | 881.6 | 30 | 339.2 | 40 | 8.99 | ES- | 2 |
| 246 | PG 22:0-22:5 | 879.6 | 30 | 329.2 | 40 | 8.99 | ES- | 1 |
| 247 | PG 22:0-22:5 | 879.6 | 30 | 339.2 | 40 | 8.99 | ES- | 2 |
| 248 | PG 22:0-22:6 | 877.6 | 30 | 327.2 | 40 | 8.99 | ES- | 1 |
| 249 | PG 22:0-22:6 | 877.6 | 30 | 339.2 | 40 | 8.99 | ES- | 2 |
| 250 | PG 22:1-22:1 | 885.7 | 30 | 337.2 | 40 | 8.99 | ES- | 1 |
| 251 | PG 22:1-22:2 | 883.6 | 30 | 335.2 | 40 | 8.99 | ES- | 1 |
| 252 | PG 22:1-22:2 | 883.6 | 30 | 337.2 | 40 | 8.99 | ES- | 2 |
| 253 | PG 22:1-22:3 | 881.6 | 30 | 333.2 | 40 | 8.99 | ES- | 1 |
| 254 | PG 22:1-22:3 | 881.6 | 30 | 337.2 | 40 | 8.99 | ES- | 2 |
| 255 | PG 22:1-22:4 | 879.6 | 30 | 331.2 | 40 | 8.99 | ES- | 1 |
| 256 | PG 22:1-22:4 | 879.6 | 30 | 337.2 | 40 | 8.99 | ES- | 2 |
| 257 | PG 22:1-22:5 | 877.6 | 30 | 329.2 | 40 | 8.99 | ES- | 1 |
| 258 | PG 22:1-22:5 | 877.6 | 30 | 337.2 | 40 | 8.99 | ES- | 2 |
| 259 | PG 22:1-22:6 | 875.6 | 30 | 327.2 | 40 | 8.99 | ES- | 1 |
| 260 | PG 22:1-22:6 | 875.6 | 30 | 337.2 | 40 | 8.99 | ES- | 2 |
| 261 | PG 22:2-22:2 | 881.6 | 30 | 335.2 | 40 | 8.99 | ES- | 1 |
| 262 | PG 22:2-22:3 | 879.6 | 30 | 333.2 | 40 | 8.99 | ES- | 1 |
| 263 | PG 22:2-22:3 | 879.6 | 30 | 335.2 | 40 | 8.99 | ES- | 2 |
| 264 | PG 22:2-22:4 | 877.6 | 30 | 331.2 | 40 | 8.99 | ES- | 1 |
| 265 | PG 22:2-22:4 | 877.6 | 30 | 335.2 | 40 | 8.99 | ES- | 2 |
| 266 | PG 22:2-22:5 | 875.6 | 30 | 329.2 | 40 | 8.99 | ES- | 1 |
| 267 | PG 22:2-22:5 | 875.6 | 30 | 335.2 | 40 | 8.99 | ES- | 2 |
| 268 | PG 22:2-22:6 | 873.6 | 30 | 327.2 | 40 | 8.99 | ES- | 1 |
| 269 | PG 22:2-22:6 | 873.6 | 30 | 335.2 | 40 | 8.99 | ES- | 2 |
| 270 | PG 22:3-22:3 | 877.6 | 30 | 333.2 | 40 | 8.99 | ES- | 1 |
| 271 | PG 22:3-22:4 | 875.6 | 30 | 331.2 | 40 | 8.99 | ES- | 1 |
| 272 | PG 22:3-22:4 | 875.6 | 30 | 333.2 | 40 | 8.99 | ES- | 2 |

|     |              |       |    |       |    |       |     |   |
|-----|--------------|-------|----|-------|----|-------|-----|---|
| 273 | PG 22:3-22:5 | 873.6 | 30 | 329.2 | 40 | 8.99  | ES- | 1 |
| 274 | PG 22:3-22:5 | 873.6 | 30 | 333.2 | 40 | 8.99  | ES- | 2 |
| 275 | PG 22:3-22:6 | 871.5 | 30 | 327.2 | 40 | 8.99  | ES- | 1 |
| 276 | PG 22:3-22:6 | 871.5 | 30 | 333.2 | 40 | 8.99  | ES- | 2 |
| 277 | PG 22:4-22:4 | 873.6 | 30 | 331.2 | 40 | 8.99  | ES- | 1 |
| 278 | PG 22:4-22:5 | 871.5 | 30 | 329.2 | 40 | 8.99  | ES- | 1 |
| 279 | PG 22:4-22:5 | 871.5 | 30 | 331.2 | 40 | 8.99  | ES- | 2 |
| 280 | PG 22:4-22:6 | 869.5 | 30 | 327.2 | 40 | 8.99  | ES- | 1 |
| 281 | PG 22:4-22:6 | 869.5 | 30 | 331.2 | 40 | 8.99  | ES- | 2 |
| 282 | PG 22:5-22:5 | 869.5 | 30 | 329.2 | 40 | 8.99  | ES- | 1 |
| 283 | PG 22:5-22:6 | 867.5 | 30 | 327.2 | 40 | 8.99  | ES- | 1 |
| 284 | PG 22:5-22:6 | 867.5 | 30 | 329.2 | 40 | 8.99  | ES- | 2 |
| 285 | PG 22:6-22:6 | 865.5 | 30 | 327.2 | 40 | 8.99  | ES- | 1 |
| 286 | PS 20:3-22:0 | 868.6 | 30 | 305.2 | 50 | 12.23 | ES- | 1 |
| 287 | PS 20:3-22:0 | 868.6 | 30 | 339.2 | 50 | 12.23 | ES- | 2 |
| 288 | PS 20:3-22:1 | 866.6 | 30 | 305.2 | 50 | 12.23 | ES- | 1 |
| 289 | PS 20:3-22:1 | 866.6 | 30 | 337.2 | 50 | 12.23 | ES- | 2 |
| 290 | PS 20:3-22:2 | 864.6 | 30 | 305.2 | 50 | 12.23 | ES- | 1 |
| 291 | PS 20:3-22:2 | 864.6 | 30 | 335.2 | 50 | 12.23 | ES- | 2 |
| 292 | PS 20:3-22:3 | 862.6 | 30 | 305.2 | 50 | 12.23 | ES- | 1 |
| 293 | PS 20:3-22:3 | 862.6 | 30 | 333.2 | 50 | 12.23 | ES- | 2 |
| 294 | PS 20:3-22:4 | 860.5 | 30 | 305.2 | 50 | 12.23 | ES- | 1 |
| 295 | PS 20:3-22:4 | 860.5 | 30 | 331.2 | 50 | 12.23 | ES- | 2 |
| 296 | PS 20:3-22:5 | 858.5 | 30 | 305.2 | 50 | 12.23 | ES- | 1 |
| 297 | PS 20:3-22:5 | 858.5 | 30 | 329.2 | 50 | 12.23 | ES- | 2 |
| 298 | PS 20:3-22:6 | 856.5 | 30 | 305.2 | 50 | 12.23 | ES- | 1 |
| 299 | PS 20:3-22:6 | 856.5 | 30 | 327.2 | 50 | 12.23 | ES- | 2 |
| 300 | PS 20:4-20:4 | 830.5 | 30 | 303.2 | 50 | 12.23 | ES- | 1 |
| 301 | PS 20:4-20:5 | 828.5 | 30 | 301.2 | 50 | 12.23 | ES- | 1 |
| 302 | PS 20:4-20:5 | 828.5 | 30 | 303.2 | 50 | 12.23 | ES- | 2 |
| 303 | PS 20:4-22:0 | 866.6 | 30 | 303.2 | 50 | 12.23 | ES- | 1 |
| 304 | PS 20:4-22:0 | 866.6 | 30 | 339.2 | 50 | 12.23 | ES- | 2 |
| 305 | PS 20:4-22:1 | 864.6 | 30 | 303.2 | 50 | 12.23 | ES- | 1 |
| 306 | PS 20:4-22:1 | 864.6 | 30 | 337.2 | 50 | 12.23 | ES- | 2 |
| 307 | PS 20:4-22:2 | 862.6 | 30 | 303.2 | 50 | 12.23 | ES- | 1 |



|     |              |       |    |       |    |       |     |   |
|-----|--------------|-------|----|-------|----|-------|-----|---|
| 308 | PS 20:4-22:2 | 862.6 | 30 | 335.2 | 50 | 12.23 | ES- | 2 |
| 309 | PS 20:4-22:3 | 860.5 | 30 | 303.2 | 50 | 12.23 | ES- | 1 |
| 310 | PS 20:4-22:3 | 860.5 | 30 | 333.2 | 50 | 12.23 | ES- | 2 |
| 311 | PS 20:4-22:4 | 858.5 | 30 | 303.2 | 50 | 12.23 | ES- | 1 |
| 312 | PS 20:4-22:4 | 858.5 | 30 | 331.2 | 50 | 12.23 | ES- | 2 |
| 313 | PS 20:4-22:5 | 856.5 | 30 | 303.2 | 50 | 12.23 | ES- | 1 |
| 314 | PS 20:4-22:5 | 856.5 | 30 | 329.2 | 50 | 12.23 | ES- | 2 |
| 315 | PS 20:4-22:6 | 854.5 | 30 | 303.2 | 50 | 12.23 | ES- | 1 |
| 316 | PS 20:4-22:6 | 854.5 | 30 | 327.2 | 50 | 12.23 | ES- | 2 |
| 317 | PS 20:5-20:5 | 826.5 | 30 | 301.2 | 50 | 12.23 | ES- | 1 |
| 318 | PS 20:5-22:0 | 864.6 | 30 | 301.2 | 50 | 12.23 | ES- | 1 |
| 319 | PS 20:5-22:0 | 864.6 | 30 | 339.2 | 50 | 12.23 | ES- | 2 |
| 320 | PS 20:5-22:1 | 862.6 | 30 | 301.2 | 50 | 12.23 | ES- | 1 |
| 321 | PS 20:5-22:1 | 862.6 | 30 | 337.2 | 50 | 12.23 | ES- | 2 |
| 322 | PS 20:5-22:2 | 860.5 | 30 | 301.2 | 50 | 12.23 | ES- | 1 |
| 323 | PS 20:5-22:2 | 860.5 | 30 | 335.2 | 50 | 12.23 | ES- | 2 |
| 324 | PS 20:5-22:3 | 858.5 | 30 | 301.2 | 50 | 12.23 | ES- | 1 |
| 325 | PS 20:5-22:3 | 858.5 | 30 | 333.2 | 50 | 12.23 | ES- | 2 |
| 326 | PS 20:5-22:4 | 856.5 | 30 | 301.2 | 50 | 12.23 | ES- | 1 |
| 327 | PS 20:5-22:4 | 856.5 | 30 | 331.2 | 50 | 12.23 | ES- | 2 |
| 328 | PS 20:5-22:5 | 854.5 | 30 | 301.2 | 50 | 12.23 | ES- | 1 |
| 329 | PS 20:5-22:5 | 854.5 | 30 | 329.2 | 50 | 12.23 | ES- | 2 |
| 330 | PS 20:5-22:6 | 852.5 | 30 | 301.2 | 50 | 12.23 | ES- | 1 |
| 331 | PS 20:5-22:6 | 852.5 | 30 | 327.2 | 50 | 12.23 | ES- | 2 |
| 332 | PS 22:0-22:0 | 902.7 | 30 | 339.2 | 50 | 12.23 | ES- | 1 |
| 333 | PS 22:0-22:1 | 900.7 | 30 | 337.2 | 50 | 12.23 | ES- | 1 |
| 334 | PS 22:0-22:1 | 900.7 | 30 | 339.2 | 50 | 12.23 | ES- | 2 |
| 335 | PS 22:0-22:2 | 898.7 | 30 | 335.2 | 50 | 12.23 | ES- | 1 |
| 336 | PS 22:0-22:2 | 898.7 | 30 | 339.2 | 50 | 12.23 | ES- | 2 |
| 337 | PS 22:0-22:3 | 896.6 | 30 | 333.2 | 50 | 12.23 | ES- | 1 |
| 338 | PS 22:0-22:3 | 896.6 | 30 | 339.2 | 50 | 12.23 | ES- | 2 |
| 339 | PS 22:0-22:4 | 894.6 | 30 | 331.2 | 50 | 12.23 | ES- | 1 |
| 340 | PS 22:0-22:4 | 894.6 | 30 | 339.2 | 50 | 12.23 | ES- | 2 |
| 341 | PS 22:0-22:5 | 892.6 | 30 | 329.2 | 50 | 12.23 | ES- | 1 |
| 342 | PS 22:0-22:5 | 892.6 | 30 | 339.2 | 50 | 12.23 | ES- | 2 |

|     |              |       |    |       |    |       |     |   |
|-----|--------------|-------|----|-------|----|-------|-----|---|
| 343 | PS 22:0-22:6 | 890.6 | 30 | 327.2 | 50 | 12.23 | ES- | 1 |
| 344 | PS 22:0-22:6 | 890.6 | 30 | 339.2 | 50 | 12.23 | ES- | 2 |
| 345 | PS 22:1-22:1 | 898.7 | 30 | 337.2 | 50 | 12.23 | ES- | 1 |
| 346 | PS 22:1-22:2 | 896.6 | 30 | 335.2 | 50 | 12.23 | ES- | 1 |
| 347 | PS 22:1-22:2 | 896.6 | 30 | 337.2 | 50 | 12.23 | ES- | 2 |
| 348 | PS 22:1-22:3 | 894.6 | 30 | 333.2 | 50 | 12.23 | ES- | 1 |
| 349 | PS 22:1-22:3 | 894.6 | 30 | 337.2 | 50 | 12.23 | ES- | 2 |
| 350 | PS 22:1-22:4 | 892.6 | 30 | 331.2 | 50 | 12.23 | ES- | 1 |
| 351 | PS 22:1-22:4 | 892.6 | 30 | 337.2 | 50 | 12.23 | ES- | 2 |
| 352 | PS 22:1-22:5 | 890.6 | 30 | 329.2 | 50 | 12.23 | ES- | 1 |
| 353 | PS 22:1-22:5 | 890.6 | 30 | 337.2 | 50 | 12.23 | ES- | 2 |
| 354 | PS 22:1-22:6 | 888.6 | 30 | 327.2 | 50 | 12.23 | ES- | 1 |
| 355 | PS 22:1-22:6 | 888.6 | 30 | 337.2 | 50 | 12.23 | ES- | 2 |
| 356 | PS 22:2-22:2 | 894.6 | 30 | 335.2 | 50 | 12.23 | ES- | 1 |
| 357 | PS 22:2-22:3 | 892.6 | 30 | 333.2 | 50 | 12.23 | ES- | 1 |
| 358 | PS 22:2-22:3 | 892.6 | 30 | 335.2 | 50 | 12.23 | ES- | 2 |
| 359 | PS 22:2-22:4 | 890.6 | 30 | 331.2 | 50 | 12.23 | ES- | 1 |
| 360 | PS 22:2-22:4 | 890.6 | 30 | 335.2 | 50 | 12.23 | ES- | 2 |
| 361 | PS 22:2-22:5 | 888.6 | 30 | 329.2 | 50 | 12.23 | ES- | 1 |
| 362 | PS 22:2-22:5 | 888.6 | 30 | 335.2 | 50 | 12.23 | ES- | 2 |
| 363 | PS 22:2-22:6 | 886.6 | 30 | 327.2 | 50 | 12.23 | ES- | 1 |
| 364 | PS 22:2-22:6 | 886.6 | 30 | 335.2 | 50 | 12.23 | ES- | 2 |
| 365 | PS 22:3-22:3 | 890.6 | 30 | 333.2 | 50 | 12.23 | ES- | 1 |
| 366 | PS 22:3-22:4 | 888.6 | 30 | 331.2 | 50 | 12.23 | ES- | 1 |
| 367 | PS 22:3-22:4 | 888.6 | 30 | 333.2 | 50 | 12.23 | ES- | 2 |
| 368 | PS 22:3-22:5 | 886.6 | 30 | 329.2 | 50 | 12.23 | ES- | 1 |
| 369 | PS 22:3-22:5 | 886.6 | 30 | 333.2 | 50 | 12.23 | ES- | 2 |
| 370 | PS 22:3-22:6 | 884.5 | 30 | 327.2 | 50 | 12.23 | ES- | 1 |
| 371 | PS 22:3-22:6 | 884.5 | 30 | 333.2 | 50 | 12.23 | ES- | 2 |
| 372 | PS 22:4-22:4 | 886.6 | 30 | 331.2 | 50 | 12.23 | ES- | 1 |
| 373 | PS 22:4-22:5 | 884.5 | 30 | 329.2 | 50 | 12.23 | ES- | 1 |
| 374 | PS 22:4-22:5 | 884.5 | 30 | 331.2 | 50 | 12.23 | ES- | 2 |
| 375 | PS 22:4-22:6 | 882.5 | 30 | 327.2 | 50 | 12.23 | ES- | 1 |
| 376 | PS 22:4-22:6 | 882.5 | 30 | 331.2 | 50 | 12.23 | ES- | 2 |
| 377 | PS 22:5-22:5 | 882.5 | 30 | 329.2 | 50 | 12.23 | ES- | 1 |

|     |              |       |    |       |    |       |     |   |
|-----|--------------|-------|----|-------|----|-------|-----|---|
| 378 | PS 22:5-22:6 | 880.5 | 30 | 327.2 | 50 | 12.23 | ES- | 1 |
| 379 | PS 22:5-22:6 | 880.5 | 30 | 329.2 | 50 | 12.23 | ES- | 2 |
| 380 | PS 22:6-22:6 | 878.5 | 30 | 327.2 | 50 | 12.23 | ES- | 1 |

Method 13: PCp and PEp (1)

| No | Name          | Precursor | CV (V) | Product | CE (V) | RT setting (min) | IonMode | Ion |
|----|---------------|-----------|--------|---------|--------|------------------|---------|-----|
| 1  | PC 16:0p-12:0 | 662.5     | 20     | 422.3   | 30     | 5.45             | ES+     | 1   |
| 2  | PC 16:0p-12:0 | 662.5     | 20     | 480.4   | 30     | 5.45             | ES+     | 2   |
| 3  | PC 16:0p-14:0 | 690.5     | 20     | 450.3   | 30     | 5.45             | ES+     | 1   |
| 4  | PC 16:0p-14:0 | 690.5     | 20     | 480.4   | 30     | 5.45             | ES+     | 2   |
| 5  | PC 16:0p-14:1 | 688.5     | 20     | 448.3   | 30     | 5.45             | ES+     | 1   |
| 6  | PC 16:0p-14:1 | 688.5     | 20     | 480.4   | 30     | 5.45             | ES+     | 2   |
| 7  | PC 16:0p-16:0 | 718.6     | 20     | 478.3   | 30     | 5.45             | ES+     | 1   |
| 8  | PC 16:0p-16:0 | 718.6     | 20     | 480.4   | 30     | 5.45             | ES+     | 2   |
| 9  | PC 16:0p-16:1 | 716.6     | 20     | 476.3   | 30     | 5.45             | ES+     | 1   |
| 10 | PC 16:0p-16:1 | 716.6     | 20     | 480.4   | 30     | 5.45             | ES+     | 2   |
| 11 | PC 16:0p-18:0 | 746.6     | 20     | 480.4   | 30     | 5.45             | ES+     | 1   |
| 12 | PC 16:0p-18:0 | 746.6     | 20     | 506.3   | 30     | 5.45             | ES+     | 2   |
| 13 | PC 16:0p-18:1 | 744.6     | 20     | 480.4   | 30     | 5.45             | ES+     | 1   |
| 14 | PC 16:0p-18:1 | 744.6     | 20     | 504.3   | 30     | 5.45             | ES+     | 2   |
| 15 | PC 16:0p-18:2 | 742.6     | 20     | 480.4   | 30     | 5.45             | ES+     | 1   |
| 16 | PC 16:0p-18:2 | 742.6     | 20     | 502.3   | 30     | 5.45             | ES+     | 2   |
| 17 | PC 16:0p-18:3 | 740.6     | 20     | 480.4   | 30     | 5.45             | ES+     | 1   |
| 18 | PC 16:0p-18:3 | 740.6     | 20     | 500.3   | 30     | 5.45             | ES+     | 2   |
| 19 | PC 16:0p-18:4 | 738.5     | 20     | 480.4   | 30     | 5.45             | ES+     | 1   |
| 20 | PC 16:0p-18:4 | 738.5     | 20     | 498.3   | 30     | 5.45             | ES+     | 2   |
| 21 | PC 16:0p-20:0 | 774.6     | 20     | 480.4   | 30     | 5.45             | ES+     | 1   |
| 22 | PC 16:0p-20:0 | 774.6     | 20     | 534.3   | 30     | 5.45             | ES+     | 2   |
| 23 | PC 16:0p-20:1 | 772.6     | 20     | 480.4   | 30     | 5.45             | ES+     | 1   |
| 24 | PC 16:0p-20:1 | 772.6     | 20     | 532.3   | 30     | 5.45             | ES+     | 2   |
| 25 | PC 16:0p-20:2 | 770.6     | 20     | 480.4   | 30     | 5.45             | ES+     | 1   |
| 26 | PC 16:0p-20:2 | 770.6     | 20     | 530.3   | 30     | 5.45             | ES+     | 2   |
| 27 | PC 16:0p-20:3 | 768.6     | 20     | 480.4   | 30     | 5.45             | ES+     | 1   |
| 28 | PC 16:0p-20:3 | 768.6     | 20     | 528.3   | 30     | 5.45             | ES+     | 2   |
| 29 | PC 16:0p-20:4 | 766.6     | 20     | 480.4   | 30     | 5.45             | ES+     | 1   |
| 30 | PC 16:0p-20:4 | 766.6     | 20     | 526.3   | 30     | 5.45             | ES+     | 2   |

|    |               |       |    |       |    |      |     |   |
|----|---------------|-------|----|-------|----|------|-----|---|
| 31 | PC 16:0p-20:5 | 764.6 | 20 | 480.4 | 30 | 5.45 | ES+ | 1 |
| 32 | PC 16:0p-20:5 | 764.6 | 20 | 524.3 | 30 | 5.45 | ES+ | 2 |
| 33 | PC 16:0p-22:0 | 802.7 | 20 | 480.4 | 30 | 5.45 | ES+ | 1 |
| 34 | PC 16:0p-22:0 | 802.7 | 20 | 562.3 | 30 | 5.45 | ES+ | 2 |
| 35 | PC 16:0p-22:1 | 800.7 | 20 | 480.4 | 30 | 5.45 | ES+ | 1 |
| 36 | PC 16:0p-22:1 | 800.7 | 20 | 560.3 | 30 | 5.45 | ES+ | 2 |
| 37 | PC 16:0p-22:2 | 798.6 | 20 | 480.4 | 30 | 5.45 | ES+ | 1 |
| 38 | PC 16:0p-22:2 | 798.6 | 20 | 558.3 | 30 | 5.45 | ES+ | 2 |
| 39 | PC 16:0p-22:3 | 796.6 | 20 | 480.4 | 30 | 5.45 | ES+ | 1 |
| 40 | PC 16:0p-22:3 | 796.6 | 20 | 556.3 | 30 | 5.45 | ES+ | 2 |
| 41 | PC 16:0p-22:4 | 794.6 | 20 | 480.4 | 30 | 5.45 | ES+ | 1 |
| 42 | PC 16:0p-22:4 | 794.6 | 20 | 554.3 | 30 | 5.45 | ES+ | 2 |
| 43 | PC 16:0p-22:5 | 792.6 | 20 | 480.4 | 30 | 5.45 | ES+ | 1 |
| 44 | PC 16:0p-22:5 | 792.6 | 20 | 552.3 | 30 | 5.45 | ES+ | 2 |
| 45 | PC 16:0p-22:6 | 790.6 | 20 | 480.4 | 30 | 5.45 | ES+ | 1 |
| 46 | PC 16:0p-22:6 | 790.6 | 20 | 550.3 | 30 | 5.45 | ES+ | 2 |
| 47 | PC 16:1p-12:0 | 660.5 | 20 | 422.3 | 30 | 5.45 | ES+ | 1 |
| 48 | PC 16:1p-12:0 | 660.5 | 20 | 478.4 | 30 | 5.45 | ES+ | 2 |
| 49 | PC 16:1p-14:0 | 688.5 | 20 | 450.3 | 30 | 5.45 | ES+ | 1 |
| 50 | PC 16:1p-14:0 | 688.5 | 20 | 478.4 | 30 | 5.45 | ES+ | 2 |
| 51 | PC 16:1p-14:1 | 686.5 | 20 | 448.3 | 30 | 5.45 | ES+ | 1 |
| 52 | PC 16:1p-14:1 | 686.5 | 20 | 478.4 | 30 | 5.45 | ES+ | 2 |
| 53 | PC 16:1p-16:0 | 716.6 | 20 | 478.3 | 30 | 5.45 | ES+ | 1 |
| 54 | PC 16:1p-16:1 | 714.5 | 20 | 476.3 | 30 | 5.45 | ES+ | 1 |
| 55 | PC 16:1p-16:1 | 714.5 | 20 | 478.4 | 30 | 5.45 | ES+ | 2 |
| 56 | PC 16:1p-18:0 | 744.6 | 20 | 478.4 | 30 | 5.45 | ES+ | 1 |
| 57 | PC 16:1p-18:0 | 744.6 | 20 | 506.3 | 30 | 5.45 | ES+ | 2 |
| 58 | PC 16:1p-18:1 | 742.6 | 20 | 478.4 | 30 | 5.45 | ES+ | 1 |
| 59 | PC 16:1p-18:1 | 742.6 | 20 | 504.3 | 30 | 5.45 | ES+ | 2 |
| 60 | PC 16:1p-18:2 | 740.6 | 20 | 478.4 | 30 | 5.45 | ES+ | 1 |
| 61 | PC 16:1p-18:2 | 740.6 | 20 | 502.3 | 30 | 5.45 | ES+ | 2 |
| 62 | PC 16:1p-18:3 | 738.5 | 20 | 478.4 | 30 | 5.45 | ES+ | 1 |
| 63 | PC 16:1p-18:3 | 738.5 | 20 | 500.3 | 30 | 5.45 | ES+ | 2 |
| 64 | PC 16:1p-18:4 | 736.5 | 20 | 478.4 | 30 | 5.45 | ES+ | 1 |
| 65 | PC 16:1p-18:4 | 736.5 | 20 | 498.3 | 30 | 5.45 | ES+ | 2 |

|     |               |       |    |       |    |      |     |   |
|-----|---------------|-------|----|-------|----|------|-----|---|
| 66  | PC 16:1p-20:0 | 772.6 | 20 | 478.4 | 30 | 5.45 | ES+ | 1 |
| 67  | PC 16:1p-20:0 | 772.6 | 20 | 534.3 | 30 | 5.45 | ES+ | 2 |
| 68  | PC 16:1p-20:1 | 770.6 | 20 | 478.4 | 30 | 5.45 | ES+ | 1 |
| 69  | PC 16:1p-20:1 | 770.6 | 20 | 532.3 | 30 | 5.45 | ES+ | 2 |
| 70  | PC 16:1p-20:2 | 768.6 | 20 | 478.4 | 30 | 5.45 | ES+ | 1 |
| 71  | PC 16:1p-20:2 | 768.6 | 20 | 530.3 | 30 | 5.45 | ES+ | 2 |
| 72  | PC 16:1p-20:3 | 766.6 | 20 | 478.4 | 30 | 5.45 | ES+ | 1 |
| 73  | PC 16:1p-20:3 | 766.6 | 20 | 528.3 | 30 | 5.45 | ES+ | 2 |
| 74  | PC 16:1p-20:4 | 764.6 | 20 | 478.4 | 30 | 5.45 | ES+ | 1 |
| 75  | PC 16:1p-20:4 | 764.6 | 20 | 526.3 | 30 | 5.45 | ES+ | 2 |
| 76  | PC 16:1p-20:5 | 762.5 | 20 | 478.4 | 30 | 5.45 | ES+ | 1 |
| 77  | PC 16:1p-20:5 | 762.5 | 20 | 524.3 | 30 | 5.45 | ES+ | 2 |
| 78  | PE 16:0p-12:0 | 620.5 | 55 | 257.3 | 20 | 6.22 | ES+ | 1 |
| 79  | PE 16:0p-12:0 | 620.5 | 55 | 364.2 | 20 | 6.22 | ES+ | 2 |
| 80  | PE 16:0p-14:0 | 648.5 | 55 | 285.3 | 20 | 6.22 | ES+ | 1 |
| 81  | PE 16:0p-14:0 | 648.5 | 55 | 364.2 | 20 | 6.22 | ES+ | 2 |
| 82  | PE 16:0p-14:1 | 646.5 | 55 | 283.3 | 20 | 6.22 | ES+ | 1 |
| 83  | PE 16:0p-14:1 | 646.5 | 55 | 364.2 | 20 | 6.22 | ES+ | 2 |
| 84  | PE 16:0p-16:0 | 676.5 | 55 | 313.3 | 20 | 6.22 | ES+ | 1 |
| 85  | PE 16:0p-16:0 | 676.5 | 55 | 364.2 | 20 | 6.22 | ES+ | 2 |
| 86  | PE 16:0p-16:1 | 674.5 | 55 | 311.3 | 20 | 6.22 | ES+ | 1 |
| 87  | PE 16:0p-16:1 | 674.5 | 55 | 364.2 | 20 | 6.22 | ES+ | 2 |
| 88  | PE 16:0p-18:0 | 704.6 | 55 | 341.3 | 20 | 6.22 | ES+ | 1 |
| 89  | PE 16:0p-18:0 | 704.6 | 55 | 364.2 | 20 | 6.22 | ES+ | 2 |
| 90  | PE 16:0p-18:1 | 702.5 | 55 | 339.3 | 20 | 6.22 | ES+ | 1 |
| 91  | PE 16:0p-18:1 | 702.5 | 55 | 364.2 | 20 | 6.22 | ES+ | 2 |
| 92  | PE 16:0p-18:2 | 700.5 | 55 | 337.3 | 20 | 6.22 | ES+ | 1 |
| 93  | PE 16:0p-18:2 | 700.5 | 55 | 364.2 | 20 | 6.22 | ES+ | 2 |
| 94  | PE 16:0p-18:3 | 698.5 | 55 | 335.3 | 20 | 6.22 | ES+ | 1 |
| 95  | PE 16:0p-18:3 | 698.5 | 55 | 364.2 | 20 | 6.22 | ES+ | 2 |
| 96  | PE 16:0p-18:4 | 696.5 | 55 | 333.3 | 20 | 6.22 | ES+ | 1 |
| 97  | PE 16:0p-18:4 | 696.5 | 55 | 364.2 | 20 | 6.22 | ES+ | 2 |
| 98  | PE 16:0p-20:0 | 732.6 | 55 | 364.2 | 20 | 6.22 | ES+ | 1 |
| 99  | PE 16:0p-20:0 | 732.6 | 55 | 369.3 | 20 | 6.22 | ES+ | 2 |
| 100 | PE 16:0p-20:1 | 730.6 | 55 | 364.2 | 20 | 6.22 | ES+ | 1 |

|     |               |       |    |       |    |      |     |   |
|-----|---------------|-------|----|-------|----|------|-----|---|
| 101 | PE 16:0p-20:1 | 730.6 | 55 | 367.3 | 20 | 6.22 | ES+ | 2 |
| 102 | PE 16:0p-20:2 | 728.6 | 55 | 364.2 | 20 | 6.22 | ES+ | 1 |
| 103 | PE 16:0p-20:2 | 728.6 | 55 | 365.3 | 20 | 6.22 | ES+ | 2 |
| 104 | PE 16:0p-20:3 | 726.5 | 55 | 363.3 | 20 | 6.22 | ES+ | 1 |
| 105 | PE 16:0p-20:3 | 726.5 | 55 | 364.2 | 20 | 6.22 | ES+ | 2 |
| 106 | PE 16:0p-20:4 | 724.5 | 55 | 361.3 | 20 | 6.22 | ES+ | 1 |
| 107 | PE 16:0p-20:4 | 724.5 | 55 | 364.2 | 20 | 6.22 | ES+ | 2 |
| 108 | PE 16:0p-20:5 | 722.5 | 55 | 359.3 | 20 | 6.22 | ES+ | 1 |
| 109 | PE 16:0p-20:5 | 722.5 | 55 | 364.2 | 20 | 6.22 | ES+ | 2 |
| 110 | PE 16:0p-22:0 | 760.6 | 55 | 364.2 | 20 | 6.22 | ES+ | 1 |
| 111 | PE 16:0p-22:0 | 760.6 | 55 | 397.3 | 20 | 6.22 | ES+ | 2 |
| 112 | PE 16:0p-22:1 | 758.6 | 55 | 364.2 | 20 | 6.22 | ES+ | 1 |
| 113 | PE 16:0p-22:1 | 758.6 | 55 | 395.3 | 20 | 6.22 | ES+ | 2 |
| 114 | PE 16:0p-22:2 | 756.6 | 55 | 364.2 | 20 | 6.22 | ES+ | 1 |
| 115 | PE 16:0p-22:2 | 756.6 | 55 | 393.3 | 20 | 6.22 | ES+ | 2 |
| 116 | PE 16:0p-22:3 | 754.6 | 55 | 364.2 | 20 | 6.22 | ES+ | 1 |
| 117 | PE 16:0p-22:3 | 754.6 | 55 | 391.3 | 20 | 6.22 | ES+ | 2 |
| 118 | PE 16:0p-22:4 | 752.6 | 55 | 364.2 | 20 | 6.22 | ES+ | 1 |
| 119 | PE 16:0p-22:4 | 752.6 | 55 | 389.3 | 20 | 6.22 | ES+ | 2 |
| 120 | PE 16:0p-22:5 | 750.5 | 55 | 364.2 | 20 | 6.22 | ES+ | 1 |
| 121 | PE 16:0p-22:5 | 750.5 | 55 | 387.3 | 20 | 6.22 | ES+ | 2 |
| 122 | PE 16:0p-22:6 | 748.5 | 55 | 364.2 | 20 | 6.22 | ES+ | 1 |
| 123 | PE 16:0p-22:6 | 748.5 | 55 | 385.3 | 20 | 6.22 | ES+ | 2 |
| 124 | PE 16:1p-12:0 | 618.4 | 55 | 257.3 | 20 | 6.22 | ES+ | 1 |
| 125 | PE 16:1p-12:0 | 618.4 | 55 | 362.2 | 20 | 6.22 | ES+ | 2 |
| 126 | PE 16:1p-14:0 | 646.5 | 55 | 285.3 | 20 | 6.22 | ES+ | 1 |
| 127 | PE 16:1p-14:0 | 646.5 | 55 | 362.2 | 20 | 6.22 | ES+ | 2 |
| 128 | PE 16:1p-14:1 | 644.5 | 55 | 283.3 | 20 | 6.22 | ES+ | 1 |
| 129 | PE 16:1p-14:1 | 644.5 | 55 | 362.2 | 20 | 6.22 | ES+ | 2 |
| 130 | PE 16:1p-16:0 | 674.5 | 55 | 313.3 | 20 | 6.22 | ES+ | 1 |
| 131 | PE 16:1p-16:0 | 674.5 | 55 | 362.2 | 20 | 6.22 | ES+ | 2 |
| 132 | PE 16:1p-16:1 | 672.5 | 55 | 311.3 | 20 | 6.22 | ES+ | 1 |
| 133 | PE 16:1p-16:1 | 672.5 | 55 | 362.2 | 20 | 6.22 | ES+ | 2 |
| 134 | PE 16:1p-18:0 | 702.5 | 55 | 341.3 | 20 | 6.22 | ES+ | 1 |
| 135 | PE 16:1p-18:0 | 702.5 | 55 | 362.2 | 20 | 6.22 | ES+ | 2 |

|     |               |       |    |       |    |      |     |   |
|-----|---------------|-------|----|-------|----|------|-----|---|
| 136 | PE 16:1p-18:1 | 698.5 | 55 | 339.3 | 20 | 6.22 | ES+ | 1 |
| 137 | PE 16:1p-18:1 | 698.5 | 55 | 362.2 | 20 | 6.22 | ES+ | 2 |
| 138 | PE 16:1p-18:2 | 698.5 | 55 | 337.3 | 20 | 6.22 | ES+ | 1 |
| 139 | PE 16:1p-18:2 | 698.5 | 55 | 362.2 | 20 | 6.22 | ES+ | 2 |
| 140 | PE 16:1p-18:3 | 696.5 | 55 | 335.3 | 20 | 6.22 | ES+ | 1 |
| 141 | PE 16:1p-18:3 | 696.5 | 55 | 362.2 | 20 | 6.22 | ES+ | 2 |
| 142 | PE 16:1p-18:4 | 694.5 | 55 | 333.3 | 20 | 6.22 | ES+ | 1 |
| 143 | PE 16:1p-18:4 | 694.5 | 55 | 362.2 | 20 | 6.22 | ES+ | 2 |
| 144 | PE 16:1p-20:0 | 730.6 | 55 | 362.2 | 20 | 6.22 | ES+ | 1 |
| 145 | PE 16:1p-20:0 | 730.6 | 55 | 369.3 | 20 | 6.22 | ES+ | 2 |
| 146 | PE 16:1p-20:1 | 728.6 | 55 | 362.2 | 20 | 6.22 | ES+ | 1 |
| 147 | PE 16:1p-20:1 | 728.6 | 55 | 367.3 | 20 | 6.22 | ES+ | 2 |
| 148 | PE 16:1p-20:2 | 726.5 | 55 | 362.2 | 20 | 6.22 | ES+ | 1 |
| 149 | PE 16:1p-20:2 | 726.5 | 55 | 365.3 | 20 | 6.22 | ES+ | 2 |
| 150 | PE 16:1p-20:3 | 724.5 | 55 | 362.2 | 20 | 6.22 | ES+ | 1 |
| 151 | PE 16:1p-20:3 | 724.5 | 55 | 363.3 | 20 | 6.22 | ES+ | 2 |
| 152 | PE 16:1p-20:4 | 722.5 | 55 | 361.3 | 20 | 6.22 | ES+ | 1 |
| 153 | PE 16:1p-20:4 | 722.5 | 55 | 362.2 | 20 | 6.22 | ES+ | 2 |
| 154 | PE 16:1p-20:5 | 720.5 | 55 | 359.3 | 20 | 6.22 | ES+ | 1 |
| 155 | PE 16:1p-20:5 | 720.5 | 55 | 362.2 | 20 | 6.22 | ES+ | 2 |

Method 14: PCp and PEp (2)

| No | Name          | Precursor | CV (V) | Product | CE (V) | RT setting (min) | IonMode | Ion |
|----|---------------|-----------|--------|---------|--------|------------------|---------|-----|
| 1  | PC 16:1p-22:0 | 800.7     | 20     | 478.4   | 30     | 5.45             | ES+     | 1   |
| 2  | PC 16:1p-22:0 | 800.7     | 20     | 562.3   | 30     | 5.45             | ES+     | 2   |
| 3  | PC 16:1p-22:1 | 798.6     | 20     | 478.4   | 30     | 5.45             | ES+     | 1   |
| 4  | PC 16:1p-22:1 | 798.6     | 20     | 560.3   | 30     | 5.45             | ES+     | 2   |
| 5  | PC 16:1p-22:2 | 796.6     | 20     | 478.4   | 30     | 5.45             | ES+     | 1   |
| 6  | PC 16:1p-22:2 | 796.6     | 20     | 558.3   | 30     | 5.45             | ES+     | 2   |
| 7  | PC 16:1p-22:3 | 794.6     | 20     | 478.4   | 30     | 5.45             | ES+     | 1   |
| 8  | PC 16:1p-22:3 | 794.6     | 20     | 556.3   | 30     | 5.45             | ES+     | 2   |
| 9  | PC 16:1p-22:4 | 792.6     | 20     | 478.4   | 30     | 5.45             | ES+     | 1   |
| 10 | PC 16:1p-22:4 | 792.6     | 20     | 554.3   | 30     | 5.45             | ES+     | 2   |
| 11 | PC 16:1p-22:5 | 790.6     | 20     | 478.4   | 30     | 5.45             | ES+     | 1   |
| 12 | PC 16:1p-22:5 | 790.6     | 20     | 552.3   | 30     | 5.45             | ES+     | 2   |
| 13 | PC 16:1p-22:6 | 788.6     | 20     | 478.4   | 30     | 5.45             | ES+     | 1   |

|    |               |       |    |       |    |      |     |   |
|----|---------------|-------|----|-------|----|------|-----|---|
| 14 | PC 16:1p-22:6 | 788.6 | 20 | 550.3 | 30 | 5.45 | ES+ | 2 |
| 15 | PC 18:0p-12:0 | 690.5 | 20 | 422.3 | 30 | 5.45 | ES+ | 1 |
| 16 | PC 18:0p-12:0 | 690.5 | 20 | 508.4 | 30 | 5.45 | ES+ | 2 |
| 17 | PC 18:0p-14:0 | 718.6 | 20 | 450.3 | 30 | 5.45 | ES+ | 1 |
| 18 | PC 18:0p-14:0 | 718.6 | 20 | 508.4 | 30 | 5.45 | ES+ | 2 |
| 19 | PC 18:0p-14:1 | 716.6 | 20 | 448.3 | 30 | 5.45 | ES+ | 1 |
| 20 | PC 18:0p-14:1 | 716.6 | 20 | 508.4 | 30 | 5.45 | ES+ | 2 |
| 21 | PC 18:0p-16:0 | 746.6 | 20 | 478.3 | 30 | 5.45 | ES+ | 1 |
| 22 | PC 18:0p-16:0 | 746.6 | 20 | 508.4 | 30 | 5.45 | ES+ | 2 |
| 23 | PC 18:0p-16:1 | 744.6 | 20 | 476.3 | 30 | 5.45 | ES+ | 1 |
| 24 | PC 18:0p-16:1 | 744.6 | 20 | 508.4 | 30 | 5.45 | ES+ | 2 |
| 25 | PC 18:0p-18:0 | 774.6 | 20 | 506.3 | 30 | 5.45 | ES+ | 1 |
| 26 | PC 18:0p-18:0 | 774.6 | 20 | 508.4 | 30 | 5.45 | ES+ | 2 |
| 27 | PC 18:0p-18:1 | 772.6 | 20 | 504.3 | 30 | 5.45 | ES+ | 1 |
| 28 | PC 18:0p-18:1 | 772.6 | 20 | 508.4 | 30 | 5.45 | ES+ | 2 |
| 29 | PC 18:0p-18:2 | 770.6 | 20 | 502.3 | 30 | 5.45 | ES+ | 1 |
| 30 | PC 18:0p-18:2 | 770.6 | 20 | 508.4 | 30 | 5.45 | ES+ | 2 |
| 31 | PC 18:0p-18:3 | 768.6 | 20 | 500.3 | 30 | 5.45 | ES+ | 1 |
| 32 | PC 18:0p-18:3 | 768.6 | 20 | 508.4 | 30 | 5.45 | ES+ | 2 |
| 33 | PC 18:0p-18:4 | 766.6 | 20 | 498.3 | 30 | 5.45 | ES+ | 1 |
| 34 | PC 18:0p-18:4 | 766.6 | 20 | 508.4 | 30 | 5.45 | ES+ | 2 |
| 35 | PC 18:0p-20:0 | 802.7 | 20 | 508.4 | 30 | 5.45 | ES+ | 1 |
| 36 | PC 18:0p-20:0 | 802.7 | 20 | 534.3 | 30 | 5.45 | ES+ | 2 |
| 37 | PC 18:0p-20:1 | 800.7 | 20 | 508.4 | 30 | 5.45 | ES+ | 1 |
| 38 | PC 18:0p-20:1 | 800.7 | 20 | 532.3 | 30 | 5.45 | ES+ | 2 |
| 39 | PC 18:0p-20:2 | 798.6 | 20 | 508.4 | 30 | 5.45 | ES+ | 1 |
| 40 | PC 18:0p-20:2 | 798.6 | 20 | 530.3 | 30 | 5.45 | ES+ | 2 |
| 41 | PC 18:0p-20:3 | 796.6 | 20 | 508.4 | 30 | 5.45 | ES+ | 1 |
| 42 | PC 18:0p-20:3 | 796.6 | 20 | 528.3 | 30 | 5.45 | ES+ | 2 |
| 43 | PC 18:0p-20:4 | 794.6 | 20 | 508.4 | 30 | 5.45 | ES+ | 1 |
| 44 | PC 18:0p-20:4 | 794.6 | 20 | 526.3 | 30 | 5.45 | ES+ | 2 |
| 45 | PC 18:0p-20:5 | 792.6 | 20 | 508.4 | 30 | 5.45 | ES+ | 1 |
| 46 | PC 18:0p-20:5 | 792.6 | 20 | 524.3 | 30 | 5.45 | ES+ | 2 |
| 47 | PC 18:0p-22:0 | 830.7 | 20 | 508.4 | 30 | 5.45 | ES+ | 1 |
| 48 | PC 18:0p-22:0 | 830.7 | 20 | 562.3 | 30 | 5.45 | ES+ | 2 |



|    |               |       |    |       |    |      |     |   |
|----|---------------|-------|----|-------|----|------|-----|---|
| 49 | PC 18:0p-22:1 | 828.7 | 20 | 508.4 | 30 | 5.45 | ES+ | 1 |
| 50 | PC 18:0p-22:1 | 828.7 | 20 | 560.3 | 30 | 5.45 | ES+ | 2 |
| 51 | PC 18:0p-22:2 | 826.7 | 20 | 508.4 | 30 | 5.45 | ES+ | 1 |
| 52 | PC 18:0p-22:2 | 826.7 | 20 | 558.3 | 30 | 5.45 | ES+ | 2 |
| 53 | PC 18:0p-22:3 | 824.7 | 20 | 508.4 | 30 | 5.45 | ES+ | 1 |
| 54 | PC 18:0p-22:3 | 824.7 | 20 | 556.3 | 30 | 5.45 | ES+ | 2 |
| 55 | PC 18:0p-22:4 | 822.6 | 20 | 508.4 | 30 | 5.45 | ES+ | 1 |
| 56 | PC 18:0p-22:4 | 822.6 | 20 | 554.3 | 30 | 5.45 | ES+ | 2 |
| 57 | PC 18:0p-22:5 | 820.6 | 20 | 508.4 | 30 | 5.45 | ES+ | 1 |
| 58 | PC 18:0p-22:5 | 820.6 | 20 | 552.3 | 30 | 5.45 | ES+ | 2 |
| 59 | PC 18:0p-22:6 | 818.6 | 20 | 508.4 | 30 | 5.45 | ES+ | 1 |
| 60 | PC 18:0p-22:6 | 818.6 | 20 | 550.3 | 30 | 5.45 | ES+ | 2 |
| 61 | PC 18:1p-12:0 | 688.5 | 20 | 422.3 | 30 | 5.45 | ES+ | 1 |
| 62 | PC 18:1p-12:0 | 688.5 | 20 | 506.4 | 30 | 5.45 | ES+ | 2 |
| 63 | PC 18:1p-14:0 | 716.6 | 20 | 450.3 | 30 | 5.45 | ES+ | 1 |
| 64 | PC 18:1p-14:0 | 716.6 | 20 | 506.4 | 30 | 5.45 | ES+ | 2 |
| 65 | PC 18:1p-14:1 | 714.5 | 20 | 448.3 | 30 | 5.45 | ES+ | 1 |
| 66 | PC 18:1p-14:1 | 714.5 | 20 | 506.4 | 30 | 5.45 | ES+ | 2 |
| 67 | PC 18:1p-16:0 | 744.6 | 20 | 478.3 | 30 | 5.45 | ES+ | 1 |
| 68 | PC 18:1p-16:0 | 744.6 | 20 | 506.4 | 30 | 5.45 | ES+ | 2 |
| 69 | PC 18:1p-16:1 | 740.6 | 20 | 476.3 | 30 | 5.45 | ES+ | 1 |
| 70 | PC 18:1p-16:1 | 740.6 | 20 | 506.4 | 30 | 5.45 | ES+ | 2 |
| 71 | PC 18:1p-18:0 | 772.6 | 20 | 506.3 | 30 | 5.45 | ES+ | 1 |
| 72 | PC 18:1p-18:1 | 770.6 | 20 | 504.3 | 30 | 5.45 | ES+ | 1 |
| 73 | PC 18:1p-18:1 | 770.6 | 20 | 506.4 | 30 | 5.45 | ES+ | 2 |
| 74 | PC 18:1p-18:2 | 768.6 | 20 | 502.3 | 30 | 5.45 | ES+ | 1 |
| 75 | PC 18:1p-18:2 | 768.6 | 20 | 506.4 | 30 | 5.45 | ES+ | 2 |
| 76 | PC 18:1p-18:3 | 766.6 | 20 | 500.3 | 30 | 5.45 | ES+ | 1 |
| 77 | PC 18:1p-18:3 | 766.6 | 20 | 506.4 | 30 | 5.45 | ES+ | 2 |
| 78 | PC 18:1p-18:4 | 764.6 | 20 | 498.3 | 30 | 5.45 | ES+ | 1 |
| 79 | PC 18:1p-18:4 | 764.6 | 20 | 506.4 | 30 | 5.45 | ES+ | 2 |
| 80 | PE 16:1p-22:0 | 758.6 | 55 | 362.2 | 20 | 6.22 | ES+ | 1 |
| 81 | PE 16:1p-22:0 | 758.6 | 55 | 397.3 | 20 | 6.22 | ES+ | 2 |
| 82 | PE 16:1p-22:1 | 756.6 | 55 | 362.2 | 20 | 6.22 | ES+ | 1 |
| 83 | PE 16:1p-22:1 | 756.6 | 55 | 395.3 | 20 | 6.22 | ES+ | 2 |

|     |               |       |    |       |    |      |     |   |
|-----|---------------|-------|----|-------|----|------|-----|---|
| 84  | PE 16:1p-22:2 | 754.6 | 55 | 362.2 | 20 | 6.22 | ES+ | 1 |
| 85  | PE 16:1p-22:2 | 754.6 | 55 | 393.3 | 20 | 6.22 | ES+ | 2 |
| 86  | PE 16:1p-22:3 | 752.6 | 55 | 362.2 | 20 | 6.22 | ES+ | 1 |
| 87  | PE 16:1p-22:3 | 752.6 | 55 | 391.3 | 20 | 6.22 | ES+ | 2 |
| 88  | PE 16:1p-22:4 | 750.5 | 55 | 362.2 | 20 | 6.22 | ES+ | 1 |
| 89  | PE 16:1p-22:4 | 750.5 | 55 | 389.3 | 20 | 6.22 | ES+ | 2 |
| 90  | PE 16:1p-22:5 | 748.5 | 55 | 362.2 | 20 | 6.22 | ES+ | 1 |
| 91  | PE 16:1p-22:5 | 748.5 | 55 | 387.3 | 20 | 6.22 | ES+ | 2 |
| 92  | PE 16:1p-22:6 | 746.5 | 55 | 362.2 | 20 | 6.22 | ES+ | 1 |
| 93  | PE 16:1p-22:6 | 746.5 | 55 | 385.3 | 20 | 6.22 | ES+ | 2 |
| 94  | PE 18:0p-12:0 | 648.5 | 55 | 257.3 | 20 | 6.22 | ES+ | 1 |
| 95  | PE 18:0p-12:0 | 648.5 | 55 | 392.3 | 20 | 6.22 | ES+ | 2 |
| 96  | PE 18:0p-14:0 | 676.5 | 55 | 285.3 | 20 | 6.22 | ES+ | 1 |
| 97  | PE 18:0p-14:0 | 676.5 | 55 | 392.3 | 20 | 6.22 | ES+ | 2 |
| 98  | PE 18:0p-14:1 | 674.5 | 55 | 283.3 | 20 | 6.22 | ES+ | 1 |
| 99  | PE 18:0p-14:1 | 674.5 | 55 | 392.3 | 20 | 6.22 | ES+ | 2 |
| 100 | PE 18:0p-16:0 | 704.6 | 55 | 313.3 | 20 | 6.22 | ES+ | 1 |
| 101 | PE 18:0p-16:0 | 704.6 | 55 | 392.3 | 20 | 6.22 | ES+ | 2 |
| 102 | PE 18:0p-16:1 | 702.5 | 55 | 311.3 | 20 | 6.22 | ES+ | 1 |
| 103 | PE 18:0p-16:1 | 702.5 | 55 | 392.3 | 20 | 6.22 | ES+ | 2 |
| 104 | PE 18:0p-18:0 | 732.6 | 55 | 341.3 | 20 | 6.22 | ES+ | 1 |
| 105 | PE 18:0p-18:0 | 732.6 | 55 | 392.3 | 20 | 6.22 | ES+ | 2 |
| 106 | PE 18:0p-18:1 | 730.6 | 55 | 339.3 | 20 | 6.22 | ES+ | 1 |
| 107 | PE 18:0p-18:1 | 730.6 | 55 | 392.3 | 20 | 6.22 | ES+ | 2 |
| 108 | PE 18:0p-18:2 | 728.6 | 55 | 337.3 | 20 | 6.22 | ES+ | 1 |
| 109 | PE 18:0p-18:2 | 728.6 | 55 | 392.3 | 20 | 6.22 | ES+ | 2 |
| 110 | PE 18:0p-18:3 | 726.5 | 55 | 335.3 | 20 | 6.22 | ES+ | 1 |
| 111 | PE 18:0p-18:3 | 726.5 | 55 | 392.3 | 20 | 6.22 | ES+ | 2 |
| 112 | PE 18:0p-18:4 | 724.5 | 55 | 333.3 | 20 | 6.22 | ES+ | 1 |
| 113 | PE 18:0p-18:4 | 724.5 | 55 | 392.3 | 20 | 6.22 | ES+ | 2 |
| 114 | PE 18:0p-20:0 | 760.6 | 55 | 369.3 | 20 | 6.22 | ES+ | 1 |
| 115 | PE 18:0p-20:0 | 760.6 | 55 | 392.3 | 20 | 6.22 | ES+ | 2 |
| 116 | PE 18:0p-20:1 | 758.6 | 55 | 367.3 | 20 | 6.22 | ES+ | 1 |
| 117 | PE 18:0p-20:1 | 758.6 | 55 | 392.3 | 20 | 6.22 | ES+ | 2 |
| 118 | PE 18:0p-20:2 | 756.6 | 55 | 365.3 | 20 | 6.22 | ES+ | 1 |

|     |               |       |    |       |    |      |     |   |
|-----|---------------|-------|----|-------|----|------|-----|---|
| 119 | PE 18:0p-20:2 | 756.6 | 55 | 392.3 | 20 | 6.22 | ES+ | 2 |
| 120 | PE 18:0p-20:3 | 754.6 | 55 | 363.3 | 20 | 6.22 | ES+ | 1 |
| 121 | PE 18:0p-20:3 | 754.6 | 55 | 392.3 | 20 | 6.22 | ES+ | 2 |
| 122 | PE 18:0p-20:4 | 752.6 | 55 | 361.3 | 20 | 6.22 | ES+ | 1 |
| 123 | PE 18:0p-20:4 | 752.6 | 55 | 392.3 | 20 | 6.22 | ES+ | 2 |
| 124 | PE 18:0p-20:5 | 750.5 | 55 | 359.3 | 20 | 6.22 | ES+ | 1 |
| 125 | PE 18:0p-20:5 | 750.5 | 55 | 392.3 | 20 | 6.22 | ES+ | 2 |
| 126 | PE 18:0p-22:0 | 788.7 | 55 | 392.3 | 20 | 6.22 | ES+ | 1 |
| 127 | PE 18:0p-22:0 | 788.7 | 55 | 397.3 | 20 | 6.22 | ES+ | 2 |
| 128 | PE 18:0p-22:1 | 786.6 | 55 | 392.3 | 20 | 6.22 | ES+ | 1 |
| 129 | PE 18:0p-22:1 | 786.6 | 55 | 395.3 | 20 | 6.22 | ES+ | 2 |
| 130 | PE 18:0p-22:2 | 784.6 | 55 | 392.3 | 20 | 6.22 | ES+ | 1 |
| 131 | PE 18:0p-22:2 | 784.6 | 55 | 393.3 | 20 | 6.22 | ES+ | 2 |
| 132 | PE 18:0p-22:3 | 782.6 | 55 | 391.3 | 20 | 6.22 | ES+ | 1 |
| 133 | PE 18:0p-22:3 | 782.6 | 55 | 392.3 | 20 | 6.22 | ES+ | 2 |
| 134 | PE 18:0p-22:4 | 780.6 | 55 | 389.3 | 20 | 6.22 | ES+ | 1 |
| 135 | PE 18:0p-22:4 | 780.6 | 55 | 392.3 | 20 | 6.22 | ES+ | 2 |
| 136 | PE 18:0p-22:5 | 778.6 | 55 | 387.3 | 20 | 6.22 | ES+ | 1 |
| 137 | PE 18:0p-22:5 | 778.6 | 55 | 392.3 | 20 | 6.22 | ES+ | 2 |
| 138 | PE 18:0p-22:6 | 776.6 | 55 | 385.3 | 20 | 6.22 | ES+ | 1 |
| 139 | PE 18:0p-22:6 | 776.6 | 55 | 392.3 | 20 | 6.22 | ES+ | 2 |
| 140 | PE 18:1p-12:0 | 646.5 | 55 | 257.3 | 20 | 6.22 | ES+ | 1 |
| 141 | PE 18:1p-12:0 | 646.5 | 55 | 390.3 | 20 | 6.22 | ES+ | 2 |
| 142 | PE 18:1p-14:0 | 674.5 | 55 | 285.3 | 20 | 6.22 | ES+ | 1 |
| 143 | PE 18:1p-14:0 | 674.5 | 55 | 390.3 | 20 | 6.22 | ES+ | 2 |
| 144 | PE 18:1p-14:1 | 672.5 | 55 | 283.3 | 20 | 6.22 | ES+ | 1 |
| 145 | PE 18:1p-14:1 | 672.5 | 55 | 390.3 | 20 | 6.22 | ES+ | 2 |
| 146 | PE 18:1p-16:0 | 702.5 | 55 | 313.3 | 20 | 6.22 | ES+ | 1 |
| 147 | PE 18:1p-16:0 | 702.5 | 55 | 390.3 | 20 | 6.22 | ES+ | 2 |
| 148 | PE 18:1p-16:1 | 698.5 | 55 | 311.3 | 20 | 6.22 | ES+ | 1 |
| 149 | PE 18:1p-16:1 | 698.5 | 55 | 390.3 | 20 | 6.22 | ES+ | 2 |
| 150 | PE 18:1p-18:0 | 730.6 | 55 | 341.3 | 20 | 6.22 | ES+ | 1 |
| 151 | PE 18:1p-18:0 | 730.6 | 55 | 390.3 | 20 | 6.22 | ES+ | 2 |
| 152 | PE 18:1p-18:1 | 728.6 | 55 | 339.3 | 20 | 6.22 | ES+ | 1 |
| 153 | PE 18:1p-18:1 | 728.6 | 55 | 390.3 | 20 | 6.22 | ES+ | 2 |

|     |               |       |    |       |    |      |     |   |
|-----|---------------|-------|----|-------|----|------|-----|---|
| 154 | PE 18:1p-18:2 | 726.5 | 55 | 337.3 | 20 | 6.22 | ES+ | 1 |
| 155 | PE 18:1p-18:2 | 726.5 | 55 | 390.3 | 20 | 6.22 | ES+ | 2 |
| 156 | PE 18:1p-18:3 | 724.5 | 55 | 335.3 | 20 | 6.22 | ES+ | 1 |
| 157 | PE 18:1p-18:3 | 724.5 | 55 | 390.3 | 20 | 6.22 | ES+ | 2 |
| 158 | PE 18:1p-18:4 | 722.5 | 55 | 333.3 | 20 | 6.22 | ES+ | 1 |
| 159 | PE 18:1p-18:4 | 722.5 | 55 | 390.3 | 20 | 6.22 | ES+ | 2 |

Method 15: PCp and PEp (3)

| No | Name          | Precursor | CV (V) | Product | CE (V) | RT setting (min) | IonMode | Ion |
|----|---------------|-----------|--------|---------|--------|------------------|---------|-----|
| 1  | PC 18:1p-20:0 | 800.7     | 20     | 506.4   | 30     | 5.45             | ES+     | 1   |
| 2  | PC 18:1p-20:0 | 800.7     | 20     | 534.3   | 30     | 5.45             | ES+     | 2   |
| 3  | PC 18:1p-20:1 | 798.6     | 20     | 506.4   | 30     | 5.45             | ES+     | 1   |
| 4  | PC 18:1p-20:1 | 798.6     | 20     | 532.3   | 30     | 5.45             | ES+     | 2   |
| 5  | PC 18:1p-20:2 | 796.6     | 20     | 506.4   | 30     | 5.45             | ES+     | 1   |
| 6  | PC 18:1p-20:2 | 796.6     | 20     | 530.3   | 30     | 5.45             | ES+     | 2   |
| 7  | PC 18:1p-20:3 | 794.6     | 20     | 506.4   | 30     | 5.45             | ES+     | 1   |
| 8  | PC 18:1p-20:3 | 794.6     | 20     | 528.3   | 30     | 5.45             | ES+     | 2   |
| 9  | PC 18:1p-20:4 | 792.6     | 20     | 506.4   | 30     | 5.45             | ES+     | 1   |
| 10 | PC 18:1p-20:4 | 792.6     | 20     | 526.3   | 30     | 5.45             | ES+     | 2   |
| 11 | PC 18:1p-20:5 | 790.6     | 20     | 506.4   | 30     | 5.45             | ES+     | 1   |
| 12 | PC 18:1p-20:5 | 790.6     | 20     | 524.3   | 30     | 5.45             | ES+     | 2   |
| 13 | PC 18:1p-22:0 | 828.7     | 20     | 506.4   | 30     | 5.45             | ES+     | 1   |
| 14 | PC 18:1p-22:0 | 828.7     | 20     | 562.3   | 30     | 5.45             | ES+     | 2   |
| 15 | PC 18:1p-22:1 | 826.7     | 20     | 506.4   | 30     | 5.45             | ES+     | 1   |
| 16 | PC 18:1p-22:1 | 826.7     | 20     | 560.3   | 30     | 5.45             | ES+     | 2   |
| 17 | PC 18:1p-22:2 | 824.7     | 20     | 506.4   | 30     | 5.45             | ES+     | 1   |
| 18 | PC 18:1p-22:2 | 824.7     | 20     | 558.3   | 30     | 5.45             | ES+     | 2   |
| 19 | PC 18:1p-22:3 | 822.6     | 20     | 506.4   | 30     | 5.45             | ES+     | 1   |
| 20 | PC 18:1p-22:3 | 822.6     | 20     | 556.3   | 30     | 5.45             | ES+     | 2   |
| 21 | PC 18:1p-22:4 | 820.6     | 20     | 506.4   | 30     | 5.45             | ES+     | 1   |
| 22 | PC 18:1p-22:4 | 820.6     | 20     | 554.3   | 30     | 5.45             | ES+     | 2   |
| 23 | PC 18:1p-22:5 | 818.6     | 20     | 506.4   | 30     | 5.45             | ES+     | 1   |
| 24 | PC 18:1p-22:5 | 818.6     | 20     | 552.3   | 30     | 5.45             | ES+     | 2   |
| 25 | PC 18:1p-22:6 | 816.6     | 20     | 506.4   | 30     | 5.45             | ES+     | 1   |
| 26 | PC 18:1p-22:6 | 816.6     | 20     | 550.3   | 30     | 5.45             | ES+     | 2   |
| 27 | PC 18:2p-12:0 | 684.5     | 20     | 422.3   | 30     | 5.45             | ES+     | 1   |

|    |               |       |    |       |    |      |     |   |
|----|---------------|-------|----|-------|----|------|-----|---|
| 28 | PC 18:2p-12:0 | 684.5 | 20 | 504.4 | 30 | 5.45 | ES+ | 2 |
| 29 | PC 18:2p-14:0 | 712.5 | 20 | 450.3 | 30 | 5.45 | ES+ | 1 |
| 30 | PC 18:2p-14:0 | 712.5 | 20 | 504.4 | 30 | 5.45 | ES+ | 2 |
| 31 | PC 18:2p-14:1 | 710.5 | 20 | 448.3 | 30 | 5.45 | ES+ | 1 |
| 32 | PC 18:2p-14:1 | 710.5 | 20 | 504.4 | 30 | 5.45 | ES+ | 2 |
| 33 | PC 18:2p-16:0 | 740.6 | 20 | 478.3 | 30 | 5.45 | ES+ | 1 |
| 34 | PC 18:2p-16:0 | 740.6 | 20 | 504.4 | 30 | 5.45 | ES+ | 2 |
| 35 | PC 18:2p-16:1 | 740.6 | 20 | 476.3 | 30 | 5.45 | ES+ | 1 |
| 36 | PC 18:2p-16:1 | 740.6 | 20 | 504.4 | 30 | 5.45 | ES+ | 2 |
| 37 | PC 18:2p-18:0 | 770.6 | 20 | 504.4 | 30 | 5.45 | ES+ | 1 |
| 38 | PC 18:2p-18:0 | 770.6 | 20 | 506.3 | 30 | 5.45 | ES+ | 2 |
| 39 | PC 18:2p-18:1 | 768.6 | 20 | 504.3 | 30 | 5.45 | ES+ | 1 |
| 40 | PC 18:2p-18:2 | 766.6 | 20 | 502.3 | 30 | 5.45 | ES+ | 1 |
| 41 | PC 18:2p-18:2 | 766.6 | 20 | 504.4 | 30 | 5.45 | ES+ | 2 |
| 42 | PC 18:2p-18:3 | 764.6 | 20 | 500.3 | 30 | 5.45 | ES+ | 1 |
| 43 | PC 18:2p-18:3 | 764.6 | 20 | 504.4 | 30 | 5.45 | ES+ | 2 |
| 44 | PC 18:2p-18:4 | 762.5 | 20 | 498.3 | 30 | 5.45 | ES+ | 1 |
| 45 | PC 18:2p-18:4 | 762.5 | 20 | 504.4 | 30 | 5.45 | ES+ | 2 |
| 46 | PC 18:2p-20:0 | 798.6 | 20 | 504.4 | 30 | 5.45 | ES+ | 1 |
| 47 | PC 18:2p-20:0 | 798.6 | 20 | 534.3 | 30 | 5.45 | ES+ | 2 |
| 48 | PC 18:2p-20:1 | 796.6 | 20 | 504.4 | 30 | 5.45 | ES+ | 1 |
| 49 | PC 18:2p-20:1 | 796.6 | 20 | 532.3 | 30 | 5.45 | ES+ | 2 |
| 50 | PC 18:2p-20:2 | 794.6 | 20 | 504.4 | 30 | 5.45 | ES+ | 1 |
| 51 | PC 18:2p-20:2 | 794.6 | 20 | 530.3 | 30 | 5.45 | ES+ | 2 |
| 52 | PC 18:2p-20:3 | 792.6 | 20 | 504.4 | 30 | 5.45 | ES+ | 1 |
| 53 | PC 18:2p-20:3 | 792.6 | 20 | 528.3 | 30 | 5.45 | ES+ | 2 |
| 54 | PC 18:2p-20:4 | 790.6 | 20 | 504.4 | 30 | 5.45 | ES+ | 1 |
| 55 | PC 18:2p-20:4 | 790.6 | 20 | 526.3 | 30 | 5.45 | ES+ | 2 |
| 56 | PC 18:2p-20:5 | 788.6 | 20 | 504.4 | 30 | 5.45 | ES+ | 1 |
| 57 | PC 18:2p-20:5 | 788.6 | 20 | 524.3 | 30 | 5.45 | ES+ | 2 |
| 58 | PC 18:2p-22:0 | 826.7 | 20 | 504.4 | 30 | 5.45 | ES+ | 1 |
| 59 | PC 18:2p-22:0 | 826.7 | 20 | 562.3 | 30 | 5.45 | ES+ | 2 |
| 60 | PC 18:2p-22:1 | 824.7 | 20 | 504.4 | 30 | 5.45 | ES+ | 1 |
| 61 | PC 18:2p-22:1 | 824.7 | 20 | 560.3 | 30 | 5.45 | ES+ | 2 |
| 62 | PC 18:2p-22:2 | 822.6 | 20 | 504.4 | 30 | 5.45 | ES+ | 1 |

|    |               |       |    |       |    |      |     |   |
|----|---------------|-------|----|-------|----|------|-----|---|
| 63 | PC 18:2p-22:2 | 822.6 | 20 | 558.3 | 30 | 5.45 | ES+ | 2 |
| 64 | PC 18:2p-22:3 | 820.6 | 20 | 504.4 | 30 | 5.45 | ES+ | 1 |
| 65 | PC 18:2p-22:3 | 820.6 | 20 | 556.3 | 30 | 5.45 | ES+ | 2 |
| 66 | PC 18:2p-22:4 | 818.6 | 20 | 504.4 | 30 | 5.45 | ES+ | 1 |
| 67 | PC 18:2p-22:4 | 818.6 | 20 | 554.3 | 30 | 5.45 | ES+ | 2 |
| 68 | PC 18:2p-22:5 | 816.6 | 20 | 504.4 | 30 | 5.45 | ES+ | 1 |
| 69 | PC 18:2p-22:5 | 816.6 | 20 | 552.3 | 30 | 5.45 | ES+ | 2 |
| 70 | PC 18:2p-22:6 | 814.6 | 20 | 504.4 | 30 | 5.45 | ES+ | 1 |
| 71 | PC 18:2p-22:6 | 814.6 | 20 | 550.3 | 30 | 5.45 | ES+ | 2 |
| 72 | PE 18:1p-20:0 | 758.6 | 55 | 369.3 | 20 | 6.22 | ES+ | 1 |
| 73 | PE 18:1p-20:0 | 758.6 | 55 | 390.3 | 20 | 6.22 | ES+ | 2 |
| 74 | PE 18:1p-20:1 | 756.6 | 55 | 367.3 | 20 | 6.22 | ES+ | 1 |
| 75 | PE 18:1p-20:1 | 756.6 | 55 | 390.3 | 20 | 6.22 | ES+ | 2 |
| 76 | PE 18:1p-20:2 | 754.6 | 55 | 365.3 | 20 | 6.22 | ES+ | 1 |
| 77 | PE 18:1p-20:2 | 754.6 | 55 | 390.3 | 20 | 6.22 | ES+ | 2 |
| 78 | PE 18:1p-20:3 | 752.6 | 55 | 363.3 | 20 | 6.22 | ES+ | 1 |
| 79 | PE 18:1p-20:3 | 752.6 | 55 | 390.3 | 20 | 6.22 | ES+ | 2 |
| 80 | PE 18:1p-20:4 | 750.5 | 55 | 361.3 | 20 | 6.22 | ES+ | 1 |
| 81 | PE 18:1p-20:4 | 750.5 | 55 | 390.3 | 20 | 6.22 | ES+ | 2 |
| 82 | PE 18:1p-20:5 | 748.5 | 55 | 359.3 | 20 | 6.22 | ES+ | 1 |
| 83 | PE 18:1p-20:5 | 748.5 | 55 | 390.3 | 20 | 6.22 | ES+ | 2 |
| 84 | PE 18:1p-22:0 | 786.6 | 55 | 390.3 | 20 | 6.22 | ES+ | 1 |
| 85 | PE 18:1p-22:0 | 786.6 | 55 | 397.3 | 20 | 6.22 | ES+ | 2 |
| 86 | PE 18:1p-22:1 | 784.6 | 55 | 390.3 | 20 | 6.22 | ES+ | 1 |
| 87 | PE 18:1p-22:1 | 784.6 | 55 | 395.3 | 20 | 6.22 | ES+ | 2 |
| 88 | PE 18:1p-22:2 | 782.6 | 55 | 390.3 | 20 | 6.22 | ES+ | 1 |
| 89 | PE 18:1p-22:2 | 782.6 | 55 | 393.3 | 20 | 6.22 | ES+ | 2 |
| 90 | PE 18:1p-22:3 | 780.6 | 55 | 390.3 | 20 | 6.22 | ES+ | 1 |
| 91 | PE 18:1p-22:3 | 780.6 | 55 | 391.3 | 20 | 6.22 | ES+ | 2 |
| 92 | PE 18:1p-22:4 | 778.6 | 55 | 389.3 | 20 | 6.22 | ES+ | 1 |
| 93 | PE 18:1p-22:4 | 778.6 | 55 | 390.3 | 20 | 6.22 | ES+ | 2 |
| 94 | PE 18:1p-22:5 | 776.6 | 55 | 387.3 | 20 | 6.22 | ES+ | 1 |
| 95 | PE 18:1p-22:5 | 776.6 | 55 | 390.3 | 20 | 6.22 | ES+ | 2 |
| 96 | PE 18:1p-22:6 | 774.5 | 55 | 385.3 | 20 | 6.22 | ES+ | 1 |
| 97 | PE 18:1p-22:6 | 774.5 | 55 | 390.3 | 20 | 6.22 | ES+ | 2 |

|     |               |       |    |       |    |      |     |   |
|-----|---------------|-------|----|-------|----|------|-----|---|
| 98  | PE 18:2p-12:0 | 642.4 | 55 | 257.3 | 20 | 6.22 | ES+ | 1 |
| 99  | PE 18:2p-12:0 | 642.4 | 55 | 388.3 | 20 | 6.22 | ES+ | 2 |
| 100 | PE 18:2p-14:0 | 670.5 | 55 | 285.3 | 20 | 6.22 | ES+ | 1 |
| 101 | PE 18:2p-14:0 | 670.5 | 55 | 388.3 | 20 | 6.22 | ES+ | 2 |
| 102 | PE 18:2p-14:1 | 668.5 | 55 | 283.3 | 20 | 6.22 | ES+ | 1 |
| 103 | PE 18:2p-14:1 | 668.5 | 55 | 388.3 | 20 | 6.22 | ES+ | 2 |
| 104 | PE 18:2p-16:0 | 698.5 | 55 | 313.3 | 20 | 6.22 | ES+ | 1 |
| 105 | PE 18:2p-16:0 | 698.5 | 55 | 388.3 | 20 | 6.22 | ES+ | 2 |
| 106 | PE 18:2p-16:1 | 698.5 | 55 | 311.3 | 20 | 6.22 | ES+ | 1 |
| 107 | PE 18:2p-16:1 | 698.5 | 55 | 388.3 | 20 | 6.22 | ES+ | 2 |
| 108 | PE 18:2p-18:0 | 728.6 | 55 | 341.3 | 20 | 6.22 | ES+ | 1 |
| 109 | PE 18:2p-18:0 | 728.6 | 55 | 388.3 | 20 | 6.22 | ES+ | 2 |
| 110 | PE 18:2p-18:1 | 726.5 | 55 | 339.3 | 20 | 6.22 | ES+ | 1 |
| 111 | PE 18:2p-18:1 | 726.5 | 55 | 388.3 | 20 | 6.22 | ES+ | 2 |
| 112 | PE 18:2p-18:2 | 724.5 | 55 | 337.3 | 20 | 6.22 | ES+ | 1 |
| 113 | PE 18:2p-18:2 | 724.5 | 55 | 388.3 | 20 | 6.22 | ES+ | 2 |
| 114 | PE 18:2p-18:3 | 722.5 | 55 | 335.3 | 20 | 6.22 | ES+ | 1 |
| 115 | PE 18:2p-18:3 | 722.5 | 55 | 388.3 | 20 | 6.22 | ES+ | 2 |
| 116 | PE 18:2p-18:4 | 720.5 | 55 | 333.3 | 20 | 6.22 | ES+ | 1 |
| 117 | PE 18:2p-18:4 | 720.5 | 55 | 388.3 | 20 | 6.22 | ES+ | 2 |
| 118 | PE 18:2p-20:0 | 756.6 | 55 | 369.3 | 20 | 6.22 | ES+ | 1 |
| 119 | PE 18:2p-20:0 | 756.6 | 55 | 388.3 | 20 | 6.22 | ES+ | 2 |
| 120 | PE 18:2p-20:1 | 754.6 | 55 | 367.3 | 20 | 6.22 | ES+ | 1 |
| 121 | PE 18:2p-20:1 | 754.6 | 55 | 388.3 | 20 | 6.22 | ES+ | 2 |
| 122 | PE 18:2p-20:2 | 752.6 | 55 | 365.3 | 20 | 6.22 | ES+ | 1 |
| 123 | PE 18:2p-20:2 | 752.6 | 55 | 388.3 | 20 | 6.22 | ES+ | 2 |
| 124 | PE 18:2p-20:3 | 750.5 | 55 | 363.3 | 20 | 6.22 | ES+ | 1 |
| 125 | PE 18:2p-20:3 | 750.5 | 55 | 388.3 | 20 | 6.22 | ES+ | 2 |
| 126 | PE 18:2p-20:4 | 748.5 | 55 | 361.3 | 20 | 6.22 | ES+ | 1 |
| 127 | PE 18:2p-20:4 | 748.5 | 55 | 388.3 | 20 | 6.22 | ES+ | 2 |
| 128 | PE 18:2p-20:5 | 746.5 | 55 | 359.3 | 20 | 6.22 | ES+ | 1 |
| 129 | PE 18:2p-20:5 | 746.5 | 55 | 388.3 | 20 | 6.22 | ES+ | 2 |
| 130 | PE 18:2p-22:0 | 784.6 | 55 | 388.3 | 20 | 6.22 | ES+ | 1 |
| 131 | PE 18:2p-22:0 | 784.6 | 55 | 397.3 | 20 | 6.22 | ES+ | 2 |
| 132 | PE 18:2p-22:1 | 782.6 | 55 | 388.3 | 20 | 6.22 | ES+ | 1 |

|     |               |       |    |       |    |      |     |   |
|-----|---------------|-------|----|-------|----|------|-----|---|
| 133 | PE 18:2p-22:1 | 782.6 | 55 | 395.3 | 20 | 6.22 | ES+ | 2 |
| 134 | PE 18:2p-22:2 | 780.6 | 55 | 388.3 | 20 | 6.22 | ES+ | 1 |
| 135 | PE 18:2p-22:2 | 780.6 | 55 | 393.3 | 20 | 6.22 | ES+ | 2 |
| 136 | PE 18:2p-22:3 | 778.6 | 55 | 388.3 | 20 | 6.22 | ES+ | 1 |
| 137 | PE 18:2p-22:3 | 778.6 | 55 | 391.3 | 20 | 6.22 | ES+ | 2 |
| 138 | PE 18:2p-22:4 | 776.6 | 55 | 388.3 | 20 | 6.22 | ES+ | 1 |
| 139 | PE 18:2p-22:4 | 776.6 | 55 | 389.3 | 20 | 6.22 | ES+ | 2 |
| 140 | PE 18:2p-22:5 | 774.5 | 55 | 387.3 | 20 | 6.22 | ES+ | 1 |
| 141 | PE 18:2p-22:5 | 774.5 | 55 | 388.3 | 20 | 6.22 | ES+ | 2 |
| 142 | PE 18:2p-22:6 | 772.5 | 55 | 385.3 | 20 | 6.22 | ES+ | 1 |
| 143 | PE 18:2p-22:6 | 772.5 | 55 | 388.3 | 20 | 6.22 | ES+ | 2 |

Method 16: TAG and PI

| No | Name     | Precursor | CV (V) | Product | CE (V) | RT setting (min) | IonMode | Ion |
|----|----------|-----------|--------|---------|--------|------------------|---------|-----|
| 1  | TAG 36:0 | 656.6     | 10     | 656.6   | 10     | 1.61             | ES+     | 1   |
| 2  | TAG 38:1 | 682.6     | 10     | 682.6   | 10     | 1.61             | ES+     | 1   |
| 3  | TAG 38:0 | 684.6     | 10     | 684.6   | 10     | 1.61             | ES+     | 1   |
| 4  | TAG 40:2 | 708.6     | 10     | 708.6   | 10     | 1.61             | ES+     | 1   |
| 5  | TAG 40:1 | 710.6     | 10     | 710.6   | 10     | 1.61             | ES+     | 1   |
| 6  | TAG 40:0 | 712.6     | 10     | 712.6   | 10     | 1.61             | ES+     | 1   |
| 7  | TAG 42:4 | 732.6     | 10     | 732.6   | 10     | 1.61             | ES+     | 1   |
| 8  | TAG 42:3 | 734.6     | 10     | 734.6   | 10     | 1.61             | ES+     | 1   |
| 9  | TAG 42:2 | 736.6     | 10     | 736.6   | 10     | 1.61             | ES+     | 1   |
| 10 | TAG 42:1 | 738.7     | 10     | 738.7   | 10     | 1.61             | ES+     | 1   |
| 11 | TAG 42:0 | 740.7     | 10     | 740.7   | 10     | 1.61             | ES+     | 1   |
| 12 | TAG 44:5 | 758.6     | 10     | 758.6   | 10     | 1.61             | ES+     | 1   |
| 13 | TAG 44:4 | 760.6     | 10     | 760.6   | 10     | 1.61             | ES+     | 1   |
| 14 | TAG 44:3 | 762.7     | 10     | 762.7   | 10     | 1.61             | ES+     | 1   |
| 15 | TAG 44:2 | 764.7     | 10     | 764.7   | 10     | 1.61             | ES+     | 1   |
| 16 | TAG 44:1 | 766.7     | 10     | 766.7   | 10     | 1.61             | ES+     | 1   |
| 17 | TAG 44:0 | 768.7     | 10     | 768.7   | 10     | 1.61             | ES+     | 1   |
| 18 | TAG 46:6 | 784.6     | 10     | 784.6   | 10     | 1.61             | ES+     | 1   |
| 19 | TAG 46:5 | 786.7     | 10     | 786.7   | 10     | 1.61             | ES+     | 1   |
| 20 | TAG 46:4 | 788.7     | 10     | 788.7   | 10     | 1.61             | ES+     | 1   |
| 21 | TAG 46:3 | 790.7     | 10     | 790.7   | 10     | 1.61             | ES+     | 1   |
| 22 | TAG 46:2 | 792.7     | 10     | 792.7   | 10     | 1.61             | ES+     | 1   |



|    |           |       |    |       |    |      |     |   |
|----|-----------|-------|----|-------|----|------|-----|---|
| 23 | TAG 46:1  | 794.7 | 10 | 794.7 | 10 | 1.61 | ES+ | 1 |
| 24 | TAG 46:0  | 796.7 | 10 | 796.7 | 10 | 1.61 | ES+ | 1 |
| 25 | TAG 48:8  | 808.6 | 10 | 808.6 | 10 | 1.61 | ES+ | 1 |
| 26 | TAG 48:7  | 810.7 | 10 | 810.7 | 10 | 1.61 | ES+ | 1 |
| 27 | TAG 48:6  | 812.7 | 10 | 812.7 | 10 | 1.61 | ES+ | 1 |
| 28 | TAG 48:5  | 814.7 | 10 | 814.7 | 10 | 1.61 | ES+ | 1 |
| 29 | TAG 48:4  | 816.7 | 10 | 816.7 | 10 | 1.61 | ES+ | 1 |
| 30 | TAG 48:3  | 818.7 | 10 | 818.7 | 10 | 1.61 | ES+ | 1 |
| 31 | TAG 48:2  | 820.7 | 10 | 820.7 | 10 | 1.61 | ES+ | 1 |
| 32 | TAG 48:1  | 822.8 | 10 | 822.8 | 10 | 1.61 | ES+ | 1 |
| 33 | TAG 48:0  | 824.8 | 10 | 824.8 | 10 | 1.61 | ES+ | 1 |
| 34 | TAG 50:9  | 834.7 | 10 | 834.7 | 10 | 1.61 | ES+ | 1 |
| 35 | TAG 50:8  | 836.7 | 10 | 836.7 | 10 | 1.61 | ES+ | 1 |
| 36 | TAG 50:7  | 838.7 | 10 | 838.7 | 10 | 1.61 | ES+ | 1 |
| 37 | TAG 50:6  | 840.7 | 10 | 840.7 | 10 | 1.61 | ES+ | 1 |
| 38 | TAG 50:5  | 842.7 | 10 | 842.7 | 10 | 1.61 | ES+ | 1 |
| 39 | TAG 50:4  | 844.7 | 10 | 844.7 | 10 | 1.61 | ES+ | 1 |
| 40 | TAG 50:3  | 846.8 | 10 | 846.8 | 10 | 1.61 | ES+ | 1 |
| 41 | TAG 50:2  | 848.8 | 10 | 848.8 | 10 | 1.61 | ES+ | 1 |
| 42 | TAG 50:1  | 850.8 | 10 | 850.8 | 10 | 1.61 | ES+ | 1 |
| 43 | TAG 50:0  | 852.8 | 10 | 852.8 | 10 | 1.61 | ES+ | 1 |
| 44 | TAG 51:0  | 866.8 | 10 | 866.8 | 10 | 1.61 | ES+ | 1 |
| 45 | TAG 52:10 | 860.7 | 10 | 860.7 | 10 | 1.61 | ES+ | 1 |
| 46 | TAG 52:9  | 862.7 | 10 | 862.7 | 10 | 1.61 | ES+ | 1 |
| 47 | TAG 52:8  | 864.7 | 10 | 864.7 | 10 | 1.61 | ES+ | 1 |
| 48 | TAG 52:7  | 866.7 | 10 | 866.7 | 10 | 1.61 | ES+ | 1 |
| 49 | TAG 52:6  | 868.7 | 10 | 868.7 | 10 | 1.61 | ES+ | 1 |
| 50 | TAG 52:5  | 870.8 | 10 | 870.8 | 10 | 1.61 | ES+ | 1 |
| 51 | TAG 52:4  | 872.8 | 10 | 872.8 | 10 | 1.61 | ES+ | 1 |
| 52 | TAG 52:3  | 874.8 | 10 | 874.8 | 10 | 1.61 | ES+ | 1 |
| 53 | TAG 52:2  | 876.8 | 10 | 876.8 | 10 | 1.61 | ES+ | 1 |
| 54 | TAG 52:1  | 878.8 | 10 | 878.8 | 10 | 1.61 | ES+ | 1 |
| 55 | TAG 52:0  | 880.8 | 10 | 880.8 | 10 | 1.61 | ES+ | 1 |
| 56 | TAG 54:12 | 884.7 | 10 | 884.7 | 10 | 1.61 | ES+ | 1 |
| 57 | TAG 54:11 | 886.7 | 10 | 886.7 | 10 | 1.61 | ES+ | 1 |

|    |           |       |    |       |    |      |     |   |
|----|-----------|-------|----|-------|----|------|-----|---|
| 58 | TAG 54:10 | 888.7 | 10 | 888.7 | 10 | 1.61 | ES+ | 1 |
| 59 | TAG 54:9  | 890.7 | 10 | 890.7 | 10 | 1.61 | ES+ | 1 |
| 60 | TAG 54:8  | 892.7 | 10 | 892.7 | 10 | 1.61 | ES+ | 1 |
| 61 | TAG 54:7  | 894.8 | 10 | 894.8 | 10 | 1.61 | ES+ | 1 |
| 62 | TAG 54:6  | 896.8 | 10 | 896.8 | 10 | 1.61 | ES+ | 1 |
| 63 | TAG 54:5  | 898.8 | 10 | 898.8 | 10 | 1.61 | ES+ | 1 |
| 64 | TAG 54:4  | 900.8 | 10 | 900.8 | 10 | 1.61 | ES+ | 1 |
| 65 | TAG 54:3  | 902.8 | 10 | 902.8 | 10 | 1.61 | ES+ | 1 |
| 66 | TAG 54:2  | 904.8 | 10 | 904.8 | 10 | 1.61 | ES+ | 1 |
| 67 | TAG 54:1  | 906.8 | 10 | 906.8 | 10 | 1.61 | ES+ | 1 |
| 68 | TAG 54:0  | 908.9 | 10 | 908.9 | 10 | 1.61 | ES+ | 1 |
| 69 | TAG 56:13 | 910.7 | 10 | 910.7 | 10 | 1.61 | ES+ | 1 |
| 70 | TAG 56:12 | 912.7 | 10 | 912.7 | 10 | 1.61 | ES+ | 1 |
| 71 | TAG 56:11 | 914.7 | 10 | 914.7 | 10 | 1.61 | ES+ | 1 |
| 72 | TAG 56:10 | 916.7 | 10 | 916.7 | 10 | 1.61 | ES+ | 1 |
| 73 | TAG 56:9  | 918.8 | 10 | 918.8 | 10 | 1.61 | ES+ | 1 |
| 74 | TAG 56:8  | 920.8 | 10 | 920.8 | 10 | 1.61 | ES+ | 1 |
| 75 | TAG 56:7  | 922.8 | 10 | 922.8 | 10 | 1.61 | ES+ | 1 |
| 76 | TAG 56:6  | 924.8 | 10 | 924.8 | 10 | 1.61 | ES+ | 1 |
| 77 | TAG 56:5  | 926.8 | 10 | 926.8 | 10 | 1.61 | ES+ | 1 |
| 78 | TAG 56:4  | 928.8 | 10 | 928.8 | 10 | 1.61 | ES+ | 1 |
| 79 | TAG 56:3  | 930.8 | 10 | 930.8 | 10 | 1.61 | ES+ | 1 |
| 80 | TAG 56:2  | 932.9 | 10 | 932.9 | 10 | 1.61 | ES+ | 1 |
| 81 | TAG 56:1  | 934.9 | 10 | 934.9 | 10 | 1.61 | ES+ | 1 |
| 82 | TAG 58:14 | 936.7 | 10 | 936.7 | 10 | 1.61 | ES+ | 1 |
| 83 | TAG 56:0  | 936.9 | 10 | 936.9 | 10 | 1.61 | ES+ | 1 |
| 84 | TAG 58:13 | 938.7 | 10 | 938.7 | 10 | 1.61 | ES+ | 1 |
| 85 | TAG 58:12 | 940.7 | 10 | 940.7 | 10 | 1.61 | ES+ | 1 |
| 86 | TAG 58:11 | 942.8 | 10 | 942.8 | 10 | 1.61 | ES+ | 1 |
| 87 | TAG 58:10 | 944.8 | 10 | 944.8 | 10 | 1.61 | ES+ | 1 |
| 88 | TAG 58:9  | 946.8 | 10 | 946.8 | 10 | 1.61 | ES+ | 1 |
| 89 | TAG 58:8  | 948.8 | 10 | 948.8 | 10 | 1.61 | ES+ | 1 |
| 90 | TAG 58:7  | 950.8 | 10 | 950.8 | 10 | 1.61 | ES+ | 1 |
| 91 | TAG 58:6  | 952.8 | 10 | 952.8 | 10 | 1.61 | ES+ | 1 |
| 92 | TAG 58:5  | 954.8 | 10 | 954.8 | 10 | 1.61 | ES+ | 1 |

|     |           |        |    |        |    |      |     |   |
|-----|-----------|--------|----|--------|----|------|-----|---|
| 93  | TAG 58:4  | 956.9  | 10 | 956.9  | 10 | 1.61 | ES+ | 1 |
| 94  | TAG 58:3  | 958.9  | 10 | 958.9  | 10 | 1.61 | ES+ | 1 |
| 95  | TAG 58:2  | 960.9  | 10 | 960.9  | 10 | 1.61 | ES+ | 1 |
| 96  | TAG 60:15 | 962.7  | 10 | 962.7  | 10 | 1.61 | ES+ | 1 |
| 97  | TAG 58:1  | 962.9  | 10 | 962.9  | 10 | 1.61 | ES+ | 1 |
| 98  | TAG 60:14 | 964.7  | 10 | 964.7  | 10 | 1.61 | ES+ | 1 |
| 99  | TAG 58:0  | 964.9  | 10 | 964.9  | 10 | 1.61 | ES+ | 1 |
| 100 | TAG 60:13 | 966.8  | 10 | 966.8  | 10 | 1.61 | ES+ | 1 |
| 101 | TAG 60:12 | 968.8  | 10 | 968.8  | 10 | 1.61 | ES+ | 1 |
| 102 | TAG 60:11 | 970.8  | 10 | 970.8  | 10 | 1.61 | ES+ | 1 |
| 103 | TAG 60:10 | 972.8  | 10 | 972.8  | 10 | 1.61 | ES+ | 1 |
| 104 | TAG 60:9  | 974.8  | 10 | 974.8  | 10 | 1.61 | ES+ | 1 |
| 105 | TAG 60:8  | 976.8  | 10 | 976.8  | 10 | 1.61 | ES+ | 1 |
| 106 | TAG 60:7  | 978.8  | 10 | 978.8  | 10 | 1.61 | ES+ | 1 |
| 107 | TAG 60:6  | 980.9  | 10 | 980.9  | 10 | 1.61 | ES+ | 1 |
| 108 | TAG 60:5  | 982.9  | 10 | 982.9  | 10 | 1.61 | ES+ | 1 |
| 109 | TAG 60:4  | 984.9  | 10 | 984.9  | 10 | 1.61 | ES+ | 1 |
| 110 | TAG 60:3  | 986.9  | 10 | 986.9  | 10 | 1.61 | ES+ | 1 |
| 111 | TAG 62:16 | 988.7  | 10 | 988.7  | 10 | 1.61 | ES+ | 1 |
| 112 | TAG 60:2  | 988.9  | 10 | 988.9  | 10 | 1.61 | ES+ | 1 |
| 113 | TAG 62:15 | 990.8  | 10 | 990.8  | 10 | 1.61 | ES+ | 1 |
| 114 | TAG 60:1  | 990.9  | 10 | 990.9  | 10 | 1.61 | ES+ | 1 |
| 115 | TAG 62:14 | 992.8  | 10 | 992.8  | 10 | 1.61 | ES+ | 1 |
| 116 | TAG 60:0  | 993.0  | 10 | 993.0  | 10 | 1.61 | ES+ | 1 |
| 117 | TAG 62:13 | 994.8  | 10 | 994.8  | 10 | 1.61 | ES+ | 1 |
| 118 | TAG 62:12 | 996.8  | 10 | 996.8  | 10 | 1.61 | ES+ | 1 |
| 119 | TAG 62:11 | 998.8  | 10 | 998.8  | 10 | 1.61 | ES+ | 1 |
| 120 | TAG 62:10 | 1000.8 | 10 | 1000.8 | 10 | 1.61 | ES+ | 1 |
| 121 | TAG 62:9  | 1002.8 | 10 | 1002.8 | 10 | 1.61 | ES+ | 1 |
| 122 | TAG 62:8  | 1004.9 | 10 | 1004.9 | 10 | 1.61 | ES+ | 1 |
| 123 | TAG 62:7  | 1006.9 | 10 | 1006.9 | 10 | 1.61 | ES+ | 1 |
| 124 | TAG 62:6  | 1008.9 | 10 | 1008.9 | 10 | 1.61 | ES+ | 1 |
| 125 | TAG 62:5  | 1010.9 | 10 | 1010.9 | 10 | 1.61 | ES+ | 1 |
| 126 | TAG 62:4  | 1012.9 | 10 | 1012.9 | 10 | 1.61 | ES+ | 1 |
| 127 | TAG 64:17 | 1014.8 | 10 | 1014.8 | 10 | 1.61 | ES+ | 1 |

|     |           |        |    |        |    |      |     |   |
|-----|-----------|--------|----|--------|----|------|-----|---|
| 128 | TAG 62:3  | 1014.9 | 10 | 1014.9 | 10 | 1.61 | ES+ | 1 |
| 129 | TAG 64:16 | 1016.8 | 10 | 1016.8 | 10 | 1.61 | ES+ | 1 |
| 130 | TAG 62:2  | 1017.0 | 10 | 1017.0 | 10 | 1.61 | ES+ | 1 |
| 131 | TAG 64:15 | 1018.8 | 10 | 1018.8 | 10 | 1.61 | ES+ | 1 |
| 132 | TAG 62:1  | 1019.0 | 10 | 1019.0 | 10 | 1.61 | ES+ | 1 |
| 133 | TAG 64:14 | 1020.8 | 10 | 1020.8 | 10 | 1.61 | ES+ | 1 |
| 134 | TAG 62:0  | 1021.0 | 10 | 1021.0 | 10 | 1.61 | ES+ | 1 |
| 135 | TAG 64:13 | 1022.8 | 10 | 1022.8 | 10 | 1.61 | ES+ | 1 |
| 136 | TAG 64:12 | 1024.8 | 10 | 1024.8 | 10 | 1.61 | ES+ | 1 |
| 137 | TAG 64:11 | 1026.8 | 10 | 1026.8 | 10 | 1.61 | ES+ | 1 |
| 138 | TAG 64:10 | 1028.9 | 10 | 1028.9 | 10 | 1.61 | ES+ | 1 |
| 139 | TAG 64:9  | 1030.9 | 10 | 1030.9 | 10 | 1.61 | ES+ | 1 |
| 140 | TAG 64:8  | 1032.9 | 10 | 1032.9 | 10 | 1.61 | ES+ | 1 |
| 141 | TAG 64:7  | 1034.9 | 10 | 1034.9 | 10 | 1.61 | ES+ | 1 |
| 142 | TAG 64:6  | 1036.9 | 10 | 1036.9 | 10 | 1.61 | ES+ | 1 |
| 143 | TAG 64:5  | 1038.9 | 10 | 1038.9 | 10 | 1.61 | ES+ | 1 |
| 144 | TAG 66:18 | 1040.8 | 10 | 1040.8 | 10 | 1.61 | ES+ | 1 |
| 145 | TAG 64:4  | 1041.0 | 10 | 1041.0 | 10 | 1.61 | ES+ | 1 |
| 146 | TAG 66:17 | 1042.8 | 10 | 1042.8 | 10 | 1.61 | ES+ | 1 |
| 147 | TAG 64:3  | 1043.0 | 10 | 1043.0 | 10 | 1.61 | ES+ | 1 |
| 148 | TAG 66:16 | 1044.8 | 10 | 1044.8 | 10 | 1.61 | ES+ | 1 |
| 149 | TAG 64:2  | 1045.0 | 10 | 1045.0 | 10 | 1.61 | ES+ | 1 |
| 150 | TAG 66:15 | 1046.8 | 10 | 1046.8 | 10 | 1.61 | ES+ | 1 |
| 151 | TAG 64:1  | 1047.0 | 10 | 1047.0 | 10 | 1.61 | ES+ | 1 |
| 152 | TAG 66:14 | 1048.8 | 10 | 1048.8 | 10 | 1.61 | ES+ | 1 |
| 153 | TAG 64:0  | 1049.0 | 10 | 1049.0 | 10 | 1.61 | ES+ | 1 |
| 154 | TAG 66:13 | 1050.8 | 10 | 1050.8 | 10 | 1.61 | ES+ | 1 |
| 155 | TAG 66:12 | 1052.9 | 10 | 1052.9 | 10 | 1.61 | ES+ | 1 |
| 156 | TAG 66:11 | 1054.9 | 10 | 1054.9 | 10 | 1.61 | ES+ | 1 |
| 157 | TAG 66:10 | 1056.9 | 10 | 1056.9 | 10 | 1.61 | ES+ | 1 |
| 158 | TAG 66:9  | 1058.9 | 10 | 1058.9 | 10 | 1.61 | ES+ | 1 |
| 159 | TAG 66:8  | 1060.9 | 10 | 1060.9 | 10 | 1.61 | ES+ | 1 |
| 160 | TAG 66:7  | 1062.9 | 10 | 1062.9 | 10 | 1.61 | ES+ | 1 |
| 161 | TAG 66:6  | 1065.0 | 10 | 1065.0 | 10 | 1.61 | ES+ | 1 |
| 162 | TAG 66:5  | 1067.0 | 10 | 1067.0 | 10 | 1.61 | ES+ | 1 |

|     |              |        |    |        |    |       |     |   |
|-----|--------------|--------|----|--------|----|-------|-----|---|
| 163 | TAG 66:4     | 1069.0 | 10 | 1069.0 | 10 | 1.61  | ES+ | 1 |
| 164 | TAG 66:3     | 1071.0 | 10 | 1071.0 | 10 | 1.61  | ES+ | 1 |
| 165 | TAG 66:2     | 1073.0 | 10 | 1073.0 | 10 | 1.61  | ES+ | 1 |
| 166 | TAG 66:1     | 1075.0 | 10 | 1075.0 | 10 | 1.61  | ES+ | 1 |
| 167 | TAG 66:0     | 1077.1 | 10 | 1077.1 | 10 | 1.61  | ES+ | 1 |
| 168 | PI 20:3-22:0 | 943.6  | 50 | 305.2  | 50 | 12.06 | ES- | 1 |
| 169 | PI 20:3-22:0 | 943.6  | 50 | 339.2  | 50 | 12.06 | ES- | 2 |
| 170 | PI 20:3-22:1 | 941.6  | 50 | 305.2  | 50 | 12.06 | ES- | 1 |
| 171 | PI 20:3-22:1 | 941.6  | 50 | 337.2  | 50 | 12.06 | ES- | 2 |
| 172 | PI 20:3-22:2 | 939.6  | 50 | 305.2  | 50 | 12.06 | ES- | 1 |
| 173 | PI 20:3-22:2 | 939.6  | 50 | 335.2  | 50 | 12.06 | ES- | 2 |
| 174 | PI 20:3-22:3 | 937.6  | 50 | 305.2  | 50 | 12.06 | ES- | 1 |
| 175 | PI 20:3-22:3 | 937.6  | 50 | 333.2  | 50 | 12.06 | ES- | 2 |
| 176 | PI 20:3-22:4 | 935.6  | 50 | 305.2  | 50 | 12.06 | ES- | 1 |
| 177 | PI 20:3-22:4 | 935.6  | 50 | 331.2  | 50 | 12.06 | ES- | 2 |
| 178 | PI 20:3-22:5 | 933.5  | 50 | 305.2  | 50 | 12.06 | ES- | 1 |
| 179 | PI 20:3-22:5 | 933.5  | 50 | 329.2  | 50 | 12.06 | ES- | 2 |
| 180 | PI 20:3-22:6 | 931.5  | 50 | 305.2  | 50 | 12.06 | ES- | 1 |
| 181 | PI 20:3-22:6 | 931.5  | 50 | 327.2  | 50 | 12.06 | ES- | 2 |
| 182 | PI 20:4-20:4 | 905.5  | 50 | 303.2  | 50 | 12.06 | ES- | 1 |
| 183 | PI 20:4-20:5 | 903.5  | 50 | 301.2  | 50 | 12.06 | ES- | 1 |
| 184 | PI 20:4-20:5 | 903.5  | 50 | 303.2  | 50 | 12.06 | ES- | 2 |
| 185 | PI 20:4-22:0 | 941.6  | 50 | 303.2  | 50 | 12.06 | ES- | 1 |
| 186 | PI 20:4-22:0 | 941.6  | 50 | 339.2  | 50 | 12.06 | ES- | 2 |
| 187 | PI 20:4-22:1 | 939.6  | 50 | 303.2  | 50 | 12.06 | ES- | 1 |
| 188 | PI 20:4-22:1 | 939.6  | 50 | 337.2  | 50 | 12.06 | ES- | 2 |
| 189 | PI 20:4-22:2 | 937.6  | 50 | 303.2  | 50 | 12.06 | ES- | 1 |
| 190 | PI 20:4-22:2 | 937.6  | 50 | 335.2  | 50 | 12.06 | ES- | 2 |
| 191 | PI 20:4-22:3 | 935.6  | 50 | 303.2  | 50 | 12.06 | ES- | 1 |
| 192 | PI 20:4-22:3 | 935.6  | 50 | 333.2  | 50 | 12.06 | ES- | 2 |
| 193 | PI 20:4-22:4 | 933.5  | 50 | 303.2  | 50 | 12.06 | ES- | 1 |
| 194 | PI 20:4-22:4 | 933.5  | 50 | 331.2  | 50 | 12.06 | ES- | 2 |
| 195 | PI 20:4-22:5 | 931.5  | 50 | 303.2  | 50 | 12.06 | ES- | 1 |
| 196 | PI 20:4-22:5 | 931.5  | 50 | 329.2  | 50 | 12.06 | ES- | 2 |
| 197 | PI 20:4-22:6 | 929.5  | 50 | 303.2  | 50 | 12.06 | ES- | 1 |

|     |              |       |    |       |    |       |     |   |
|-----|--------------|-------|----|-------|----|-------|-----|---|
| 198 | PI 20:4-22:6 | 929.5 | 50 | 327.2 | 50 | 12.06 | ES- | 2 |
| 199 | PI 20:5-20:5 | 901.5 | 50 | 301.2 | 50 | 12.06 | ES- | 1 |
| 200 | PI 20:5-22:0 | 939.6 | 50 | 301.2 | 50 | 12.06 | ES- | 1 |
| 201 | PI 20:5-22:0 | 939.6 | 50 | 339.2 | 50 | 12.06 | ES- | 2 |
| 202 | PI 20:5-22:1 | 937.6 | 50 | 301.2 | 50 | 12.06 | ES- | 1 |
| 203 | PI 20:5-22:1 | 937.6 | 50 | 337.2 | 50 | 12.06 | ES- | 2 |
| 204 | PI 20:5-22:2 | 935.6 | 50 | 301.2 | 50 | 12.06 | ES- | 1 |
| 205 | PI 20:5-22:2 | 935.6 | 50 | 335.2 | 50 | 12.06 | ES- | 2 |
| 206 | PI 20:5-22:3 | 933.5 | 50 | 301.2 | 50 | 12.06 | ES- | 1 |
| 207 | PI 20:5-22:3 | 933.5 | 50 | 333.2 | 50 | 12.06 | ES- | 2 |
| 208 | PI 20:5-22:4 | 931.5 | 50 | 301.2 | 50 | 12.06 | ES- | 1 |
| 209 | PI 20:5-22:4 | 931.5 | 50 | 331.2 | 50 | 12.06 | ES- | 2 |
| 210 | PI 20:5-22:5 | 929.5 | 50 | 301.2 | 50 | 12.06 | ES- | 1 |
| 211 | PI 20:5-22:5 | 929.5 | 50 | 329.2 | 50 | 12.06 | ES- | 2 |
| 212 | PI 20:5-22:6 | 927.5 | 50 | 301.2 | 50 | 12.06 | ES- | 1 |
| 213 | PI 20:5-22:6 | 927.5 | 50 | 327.2 | 50 | 12.06 | ES- | 2 |
| 214 | PI 22:0-22:0 | 977.7 | 50 | 339.2 | 50 | 12.06 | ES- | 1 |
| 215 | PI 22:0-22:1 | 975.7 | 50 | 337.2 | 50 | 12.06 | ES- | 1 |
| 216 | PI 22:0-22:1 | 975.7 | 50 | 339.2 | 50 | 12.06 | ES- | 2 |
| 217 | PI 22:0-22:2 | 973.7 | 50 | 335.2 | 50 | 12.06 | ES- | 1 |
| 218 | PI 22:0-22:2 | 973.7 | 50 | 339.2 | 50 | 12.06 | ES- | 2 |
| 219 | PI 22:0-22:3 | 971.7 | 50 | 333.2 | 50 | 12.06 | ES- | 1 |
| 220 | PI 22:0-22:3 | 971.7 | 50 | 339.2 | 50 | 12.06 | ES- | 2 |
| 221 | PI 22:0-22:4 | 969.6 | 50 | 331.2 | 50 | 12.06 | ES- | 1 |
| 222 | PI 22:0-22:4 | 969.6 | 50 | 339.2 | 50 | 12.06 | ES- | 2 |
| 223 | PI 22:0-22:5 | 967.6 | 50 | 329.2 | 50 | 12.06 | ES- | 1 |
| 224 | PI 22:0-22:5 | 967.6 | 50 | 339.2 | 50 | 12.06 | ES- | 2 |
| 225 | PI 22:0-22:6 | 965.6 | 50 | 327.2 | 50 | 12.06 | ES- | 1 |
| 226 | PI 22:0-22:6 | 965.6 | 50 | 339.2 | 50 | 12.06 | ES- | 2 |
| 227 | PI 22:1-22:1 | 973.7 | 50 | 337.2 | 50 | 12.06 | ES- | 1 |
| 228 | PI 22:1-22:2 | 971.7 | 50 | 335.2 | 50 | 12.06 | ES- | 1 |
| 229 | PI 22:1-22:2 | 971.7 | 50 | 337.2 | 50 | 12.06 | ES- | 2 |
| 230 | PI 22:1-22:3 | 969.6 | 50 | 333.2 | 50 | 12.06 | ES- | 1 |
| 231 | PI 22:1-22:3 | 969.6 | 50 | 337.2 | 50 | 12.06 | ES- | 2 |
| 232 | PI 22:1-22:4 | 967.6 | 50 | 331.2 | 50 | 12.06 | ES- | 1 |

|     |              |       |    |       |    |       |     |   |
|-----|--------------|-------|----|-------|----|-------|-----|---|
| 233 | PI 22:1-22:4 | 967.6 | 50 | 337.2 | 50 | 12.06 | ES- | 2 |
| 234 | PI 22:1-22:5 | 965.6 | 50 | 329.2 | 50 | 12.06 | ES- | 1 |
| 235 | PI 22:1-22:5 | 965.6 | 50 | 337.2 | 50 | 12.06 | ES- | 2 |
| 236 | PI 22:1-22:6 | 963.6 | 50 | 327.2 | 50 | 12.06 | ES- | 1 |
| 237 | PI 22:1-22:6 | 963.6 | 50 | 337.2 | 50 | 12.06 | ES- | 2 |
| 238 | PI 22:2-22:2 | 969.6 | 50 | 335.2 | 50 | 12.06 | ES- | 1 |
| 239 | PI 22:2-22:3 | 967.6 | 50 | 333.2 | 50 | 12.06 | ES- | 1 |
| 240 | PI 22:2-22:3 | 967.6 | 50 | 335.2 | 50 | 12.06 | ES- | 2 |
| 241 | PI 22:2-22:4 | 965.6 | 50 | 331.2 | 50 | 12.06 | ES- | 1 |
| 242 | PI 22:2-22:4 | 965.6 | 50 | 335.2 | 50 | 12.06 | ES- | 2 |
| 243 | PI 22:2-22:5 | 963.6 | 50 | 329.2 | 50 | 12.06 | ES- | 1 |
| 244 | PI 22:2-22:5 | 963.6 | 50 | 335.2 | 50 | 12.06 | ES- | 2 |
| 245 | PI 22:2-22:6 | 961.6 | 50 | 327.2 | 50 | 12.06 | ES- | 1 |
| 246 | PI 22:2-22:6 | 961.6 | 50 | 335.2 | 50 | 12.06 | ES- | 2 |
| 247 | PI 22:3-22:3 | 965.6 | 50 | 333.2 | 50 | 12.06 | ES- | 1 |
| 248 | PI 22:3-22:4 | 963.6 | 50 | 331.2 | 50 | 12.06 | ES- | 1 |
| 249 | PI 22:3-22:4 | 963.6 | 50 | 333.2 | 50 | 12.06 | ES- | 2 |
| 250 | PI 22:3-22:5 | 961.6 | 50 | 329.2 | 50 | 12.06 | ES- | 1 |
| 251 | PI 22:3-22:5 | 961.6 | 50 | 333.2 | 50 | 12.06 | ES- | 2 |
| 252 | PI 22:3-22:6 | 959.6 | 50 | 327.2 | 50 | 12.06 | ES- | 1 |
| 253 | PI 22:3-22:6 | 959.6 | 50 | 333.2 | 50 | 12.06 | ES- | 2 |
| 254 | PI 22:4-22:4 | 961.6 | 50 | 331.2 | 50 | 12.06 | ES- | 1 |
| 255 | PI 22:4-22:5 | 959.6 | 50 | 329.2 | 50 | 12.06 | ES- | 1 |
| 256 | PI 22:4-22:5 | 959.6 | 50 | 331.2 | 50 | 12.06 | ES- | 2 |
| 257 | PI 22:4-22:6 | 957.5 | 50 | 327.2 | 50 | 12.06 | ES- | 1 |
| 258 | PI 22:4-22:6 | 957.5 | 50 | 331.2 | 50 | 12.06 | ES- | 2 |
| 259 | PI 22:5-22:5 | 957.5 | 50 | 329.2 | 50 | 12.06 | ES- | 1 |
| 260 | PI 22:5-22:6 | 955.5 | 50 | 327.2 | 50 | 12.06 | ES- | 1 |
| 261 | PI 22:5-22:6 | 955.5 | 50 | 329.2 | 50 | 12.06 | ES- | 2 |
| 262 | PI 22:6-22:6 | 953.5 | 50 | 327.2 | 50 | 12.06 | ES- | 1 |

**Supplemental Table S6:** Repeatability of retention time on five different days.

| Lipid class        | RT (min)     |              |              |              |              | RSD (%) <sup>a</sup> |
|--------------------|--------------|--------------|--------------|--------------|--------------|----------------------|
|                    | Day 1        | Day 2        | Day 3        | Day 4        | Day 5        |                      |
| LPC 17:0           | 6.22 ± 0.01  | 6.21 ± 0.01  | 6.17 ± 0.01  | 6.19 ± 0.00  | 6.21 ± 0.00  | 0.3                  |
| LPE 17:1           | 7.66 ± 0.01  | 7.64 ± 0.01  | 7.58 ± 0.02  | 7.62 ± 0.01  | 7.63 ± 0.00  | 0.4                  |
| PC 17:0-17:0       | 5.53 ± 0.01  | 5.52 ± 0.01  | 5.46 ± 0.01  | 5.49 ± 0.01  | 5.51 ± 0.00  | 0.5                  |
| PE 17:0-17:0       | 6.41 ± 0.01  | 6.38 ± 0.00  | 6.31 ± 0.02  | 6.37 ± 0.00  | 6.37 ± 0.00  | 0.6                  |
| PS 17:0-17:0       | 12.44 ± 0.01 | 12.39 ± 0.01 | 12.36 ± 0.02 | 12.40 ± 0.01 | 12.38 ± 0.01 | 0.2                  |
| SM d18:1-17:0      | 5.93 ± 0.01  | 5.92 ± 0.00  | 5.88 ± 0.01  | 5.90 ± 0.01  | 5.92 ± 0.00  | 0.3                  |
| Cer d18:1-17:0     | 4.40 ± 0.02  | 4.40 ± 0.01  | 4.47 ± 0.02  | 4.44 ± 0.02  | 4.42 ± 0.00  | 0.7                  |
| CE 17:0            | 1.17 ± 0.05  | 1.13 ± 0.05  | 1.02 ± 0.03  | 1.06 ± 0.02  | 1.09 ± 0.01  | 5.4                  |
| MAG 17:0           | 3.92 ± 0.01  | 3.93 ± 0.01  | 3.98 ± 0.02  | 3.95 ± 0.01  | 3.94 ± 0.01  | 0.6                  |
| DAG 12:0-12:0      | 3.07 ± 0.01  | 3.08 ± 0.01  | 3.08 ± 0.00  | 3.09 ± 0.01  | 3.09 ± 0.01  | 0.3                  |
| TAG 17:0-17:0-17:0 | 1.56 ± 0.01  | 1.58 ± 0.01  | 1.44 ± 0.13  | 1.56 ± 0.09  | 1.61 ± 0.02  | 4.2                  |
| FFA 17:0           | 4.04 ± 0.01  | 4.05 ± 0.01  | 4.09 ± 0.02  | 4.07 ± 0.01  | 4.06 ± 0.01  | 0.5                  |

<sup>a</sup> Relative standard deviation (RSD) observed by the analysis of internal standards in rabbit plasma samples on five different measurement days.



**Supplemental Table S7:** Sensitivity of SFC/QTOFMS system.

| Lipid class           | Ion mode | Adduct ion                             | MS <sup>1</sup> ( <i>m/z</i> ) | LOD <sup>a</sup><br>( $\mu$ M) |
|-----------------------|----------|----------------------------------------|--------------------------------|--------------------------------|
| LPC 17:0              | ESI+     | [M + H] <sup>+</sup>                   | 510.3554                       | 0.1                            |
| LPE 17:1              | ESI+     | [M + H] <sup>+</sup>                   | 466.2928                       | 0.1                            |
| LPG 17:1              | ESI+     | [M + H] <sup>+</sup>                   | 497.2874                       | 50                             |
| LPA 17:0              | ESI-     | [M - H] <sup>-</sup>                   | 423.2517                       | 1                              |
| LPI 17:1              | ESI-     | [M - H] <sup>-</sup>                   | 583.2889                       | 1                              |
| LPS 17:1              | ESI+     | [M + H] <sup>+</sup>                   | 498.3874                       | n.d.                           |
| PC 17:0-17:0          | ESI-     | [M + CH <sub>3</sub> COO] <sup>-</sup> | 820.6073                       | 1                              |
| PE 17:0-17:0          | ESI-     | [M - H] <sup>-</sup>                   | 718.5392                       | 1                              |
| PG 17:0-17:0          | ESI-     | [M - H] <sup>-</sup>                   | 749.5338                       | 0.1                            |
| PA 17:0-17:0          | ESI-     | [M - H] <sup>-</sup>                   | 675.497                        | 1                              |
| PS 17:0-17:0          | ESI-     | [M - H] <sup>-</sup>                   | 762.5291                       | 1                              |
| SM d18:1-17:0         | ESI+     | [M + H] <sup>+</sup>                   | 717.5905                       | 0.1                            |
| Cer d18:1-17:0        | ESI+     | [M + H] <sup>+</sup>                   | 552.535                        | 0.1                            |
| CE 17:0               | ESI+     | [M + NH <sub>4</sub> ] <sup>+</sup>    | 656.634                        | n.d.                           |
| MAG 17:0              | ESI+     | [M + H] <sup>+</sup>                   | 245.2999                       | 1                              |
| DAG 12:0-12:0         | ESI+     | [M + NH <sub>4</sub> ] <sup>+</sup>    | 474.4153                       | 1                              |
| TAG<br>17:0-17:0-17:0 | ESI+     | [M + NH <sub>4</sub> ] <sup>+</sup>    | 866.8171                       | 0.1                            |
| FFA 17:0              | ESI-     | [M - H] <sup>-</sup>                   | 269.2486                       | 0.1                            |

<sup>a</sup> Limit of detection (*S/N* = 3).

Xevo G2-XS QToF MS analytical conditions were as follows: ion source mode, ESI mode; capillary voltage, 3.0 kV; sampling cone, 40; source offset, 80; source temperature, 150 °C; desolvation temperature, 500 °C; cone gas flow rate, 50 L h<sup>-1</sup>; desolvation gas flow rate, 1000 L h<sup>-1</sup>. Mass range of MSe acquisition was set to 50–1200 Da, and scan time was set to 0.1 sec. Low-energy of collision energy was off, and its high-energy was set to 10–30 V.

**Supplemental Table S8:** Characteristics of WHHLMI rabbits by EPA administration.

|                                  | Placebo group ( $n = 6$ ) |                              | EPA group ( $n = 6$ ) |                              |
|----------------------------------|---------------------------|------------------------------|-----------------------|------------------------------|
|                                  | Before administration     | 5 weeks after administration | Before administration | 5 weeks after administration |
| Age (month)                      | 14 $\pm$ 1                |                              | 14 $\pm$ 1            |                              |
| Sex (% female)                   | 100                       |                              | 100                   |                              |
| Body weight (kg)                 | 3.5 $\pm$ 0.4             | 3.5 $\pm$ 0.4                | 3.5 $\pm$ 0.2         | 3.5 $\pm$ 0.2                |
| Total Cho (mg dL <sup>-1</sup> ) | 1196 $\pm$ 118            | 1110 $\pm$ 135               | 1171 $\pm$ 68         | 840 $\pm$ 113*               |

Values are mean  $\pm$  standard deviation. Statistical significance was determined using Paired  $t$ -test (\* $P < 0.001$ ).

**Supplemental Table S9:** Concentration of each lipid molecule in the WHLMI rabbit plasma.

| Lipid                                     | Ion mode | MS <sup>1</sup> | RT          | Lipid concentration (nmol mL <sup>-1</sup> in plasma) |                          |            |                               |                                       |            |
|-------------------------------------------|----------|-----------------|-------------|-------------------------------------------------------|--------------------------|------------|-------------------------------|---------------------------------------|------------|
|                                           |          |                 |             | Placebo group (n = 6)                                 |                          |            | EPA group (n = 6)             |                                       |            |
|                                           |          |                 |             | Administration period (weeks)                         |                          | p-value    | Administration period (weeks) |                                       | p-value    |
|                                           |          |                 |             | (m/z)                                                 | (min)                    | 0          | 5                             | 0 week (placebo) vs. 5 week (placebo) | 0          |
| LPC 14:0 ( <i>sn</i> -1 and <i>sn</i> -2) | Positive | 468.3           | 6.15 ± 0.01 | 0.54 ± 0.12                                           | 0.63 ± 0.11              | 0.22148808 | 0.45 ± 0.13                   | 0.39 ± 0.10                           | 0.33877507 |
| LPC 16:0 ( <i>sn</i> -1)                  | Positive | 496.3           | 6.10 ± 0.01 | 188 ± 18                                              | 200 ± 16                 | 0.23905348 | 189 ± 13                      | 185 ± 14                              | 0.57573889 |
| LPC 16:0 ( <i>sn</i> -2)                  | Positive | 496.3           | 6.17 ± 0.01 | 24.3 ± 2.4                                            | 26.5 ± 2.6               | 0.14970214 | 23.6 ± 2.0                    | 23.9 ± 1.8                            | 0.79923921 |
| LPC 16:1 ( <i>sn</i> -1)                  | Positive | 494.3           | 6.15 ± 0.01 | 4.6 ± 0.6                                             | 4.6 ± 0.8                | 0.91760713 | 5.1 ± 0.4                     | 3.6 ± 0.5 <sup>***</sup>              | 0.00016648 |
| LPC 16:1 ( <i>sn</i> -2)                  | Positive | 494.3           | 6.22 ± 0.01 | 0.62 ± 0.07                                           | 0.63 ± 0.17              | 0.88980424 | 0.59 ± 0.10                   | 0.43 ± 0.02 <sup>*</sup>              | 0.00451377 |
| LPC 18:0 ( <i>sn</i> -1)                  | Positive | 524.4           | 6.06 ± 0.01 | 258 ± 24                                              | 271 ± 15                 | 0.29437566 | 267 ± 33                      | 253 ± 29                              | 0.42671344 |
| LPC 18:0 ( <i>sn</i> -2)                  | Positive | 524.4           | 6.12 ± 0.01 | 43.9 ± 4.3                                            | 45.8 ± 3.7               | 0.41606963 | 43.3 ± 4.4                    | 42.3 ± 2.8                            | 0.63502556 |
| LPC 18:1 ( <i>sn</i> -1)                  | Positive | 522.4           | 6.10 ± 0.01 | 67.9 ± 4.2                                            | 76.4 ± 5.1 <sup>*</sup>  | 0.01053796 | 69.4 ± 7.8                    | 49.2 ± 2.3 <sup>***</sup>             | 0.00011010 |
| LPC 18:1 ( <i>sn</i> -2)                  | Positive | 522.4           | 6.17 ± 0.01 | 15.8 ± 1.6                                            | 18.5 ± 1.1 <sup>**</sup> | 0.00708809 | 16.0 ± 1.2                    | 11.3 ± 0.4 <sup>***</sup>             | 0.00000388 |
| LPC 18:2 ( <i>sn</i> -1)                  | Positive | 520.3           | 6.16 ± 0.01 | 142 ± 14                                              | 150 ± 8                  | 0.24644059 | 145 ± 7                       | 88.5 ± 5.5 <sup>***</sup>             | 0.00000002 |
| LPC 18:2 ( <i>sn</i> -2)                  | Positive | 520.3           | 6.23 ± 0.01 | 25.6 ± 2.2                                            | 27.3 ± 2.0               | 0.19420385 | 26.9 ± 1.9                    | 17.0 ± 1.0 <sup>***</sup>             | 0.00000063 |
| LPC 18:3 ( <i>sn</i> -1)                  | Positive | 518.3           | 6.22 ± 0.01 | 5.6 ± 0.6                                             | 6.4 ± 1.1                | 0.18936881 | 6.1 ± 0.9                     | 3.3 ± 0.7 <sup>***</sup>              | 0.00018714 |
| LPC 18:3 ( <i>sn</i> -2)                  | Positive | 518.3           | 6.28 ± 0.01 | 1.1 ± 0.2                                             | 1.3 ± 0.3                | 0.16672866 | 1.1 ± 0.2                     | 0.66 ± 0.18 <sup>**</sup>             | 0.00127981 |
| LPC 20:0 ( <i>sn</i> -1)                  | Positive | 552.4           | 6.03 ± 0.01 | 1.6 ± 0.4                                             | 1.3 ± 0.2                | 0.19577715 | 1.5 ± 0.2                     | 1.3 ± 0.3                             | 0.11637590 |
| LPC 20:0 ( <i>sn</i> -2)                  | Positive | 552.4           | 6.07 ± 0.01 | 0.33 ± 0.08                                           | 0.28 ± 0.06              | 0.24779310 | 0.33 ± 0.12                   | 0.19 ± 0.11                           | 0.06873377 |
| LPC 20:1 ( <i>sn</i> -1)                  | Positive | 550.4           | 6.07 ± 0.01 | 1.4 ± 0.1                                             | 1.2 ± 0.3                | 0.15983041 | 1.4 ± 0.2                     | 0.87 ± 0.20 <sup>**</sup>             | 0.00115289 |
| LPC 20:1 ( <i>sn</i> -2)                  | Positive | 550.4           | 6.12 ± 0.01 | 0.29 ± 0.05                                           | 0.24 ± 0.05              | 0.12458244 | 0.22 ± 0.06                   | 0.12 ± 0.04 <sup>*</sup>              | 0.01160282 |

|                                           |          |       |             |                                |                                |            |                                |                                |            |
|-------------------------------------------|----------|-------|-------------|--------------------------------|--------------------------------|------------|--------------------------------|--------------------------------|------------|
| LPC 20:2 ( <i>sn</i> -1)                  | Positive | 548.4 | 6.12 ± 0.01 | 1.8 ± 0.4                      | 2.1 ± 0.4                      | 0.14499747 | 1.7 ± 0.3                      | 1.1 ± 0.2 <sup>***</sup>       | 0.00091420 |
| LPC 20:2 ( <i>sn</i> -2)                  | Positive | 548.4 | 6.18 ± 0.02 | 0.27 ± 0.08                    | 0.32 ± 0.09                    | 0.34059388 | 0.19 ± 0.06                    | 0.17 ± 0.05                    | 0.52889817 |
| LPC 20:3 ( <i>sn</i> -1)                  | Positive | 546.4 | 6.15 ± 0.01 | 2.6 ± 0.5                      | 2.9 ± 0.4                      | 0.24152064 | 2.5 ± 0.5                      | 1.8 ± 0.2 <sup>**</sup>        | 0.00926394 |
| LPC 20:3 ( <i>sn</i> -2)                  | Positive | 546.4 | 6.22 ± 0.02 | 0.41 ± 0.09                    | 0.48 ± 0.11                    | 0.27679075 | 0.37 ± 0.10                    | 0.28 ± 0.13                    | 0.19549735 |
| LPC 20:4 ( <i>sn</i> -1)                  | Positive | 544.3 | 6.18 ± 0.01 | 7.8 ± 0.9                      | 8.5 ± 0.9                      | 0.28097577 | 8.3 ± 0.7                      | 8.0 ± 0.8                      | 0.47120068 |
| LPC 20:4 ( <i>sn</i> -2)                  | Positive | 544.3 | 6.24 ± 0.01 | 1.8 ± 0.3                      | 1.9 ± 0.5                      | 0.76103297 | 1.9 ± 0.1                      | 2.7 ± 0.2 <sup>***</sup>       | 0.00000654 |
| LPC 20:5 ( <i>sn</i> -1)                  | Positive | 542.3 | 6.24 ± 0.01 | 0.21 ± 0.09                    | 0.25 ± 0.06                    | 0.48549756 | 0.18 ± 0.07                    | 12.3 ± 2.8 <sup>***</sup>      | 0.00000103 |
| LPC 20:5 ( <i>sn</i> -2)                  | Positive | 542.3 | 6.30 ± 0.02 | (3.9 ± 2.3) × 10 <sup>-2</sup> | (3.2 ± 1.7) × 10 <sup>-2</sup> | 0.58734440 | (3.7 ± 2.4) × 10 <sup>-2</sup> | 3.0 ± 0.6 <sup>***</sup>       | 0.00000012 |
| LPC 22:0 ( <i>sn</i> -1)                  | Positive | 580.4 | 6.00 ± 0.01 | 0.44 ± 0.15                    | 0.34 ± 0.06                    | 0.16518053 | 0.48 ± 0.08                    | 0.31 ± 0.06 <sup>**</sup>      | 0.00262235 |
| LPC 22:0 ( <i>sn</i> -2)                  | Positive | 580.4 | 6.05 ± 0.01 | (8.7 ± 6.1) × 10 <sup>-2</sup> | (8.9 ± 5.2) × 10 <sup>-2</sup> | 0.96308750 | 0.16 ± 0.07                    | 0.10 ± 0.03                    | 0.08467982 |
| LPC 22:1 ( <i>sn</i> -1 and <i>sn</i> -2) | Positive | 578.4 | 6.04 ± 0.02 | 0.14 ± 0.06                    | 0.12 ± 0.03                    | 0.36450327 | 0.10 ± 0.06                    | (8.8 ± 3.7) × 10 <sup>-2</sup> | 0.74824637 |
| LPC 22:4 ( <i>sn</i> -1)                  | Positive | 572.4 | 6.15 ± 0.01 | 0.76 ± 0.12                    | 0.84 ± 0.21                    | 0.40600317 | 0.76 ± 0.15                    | 0.21 ± 0.08 <sup>***</sup>     | 0.00001235 |
| LPC 22:4 ( <i>sn</i> -2)                  | Positive | 572.4 | 6.21 ± 0.02 | 0.18 ± 0.09                    | 0.18 ± 0.04                    | 0.97806787 | 0.13 ± 0.02                    | 0.38 ± 0.13 <sup>**</sup>      | 0.00081991 |
| LPC 22:5 ( <i>sn</i> -1)                  | Positive | 570.4 | 6.20 ± 0.01 | 1.1 ± 0.2                      | 1.1 ± 0.2                      | 0.48229559 | 1.2 ± 0.2                      | 7.1 ± 1.5 <sup>***</sup>       | 0.00000224 |
| LPC 22:5 ( <i>sn</i> -2)                  | Positive | 570.4 | 6.26 ± 0.01 | 0.20 ± 0.06                    | 0.23 ± 0.05                    | 0.31246450 | 0.21 ± 0.02                    | 1.4 ± 0.2 <sup>***</sup>       | 0.00000009 |
| LPC 22:6 ( <i>sn</i> -1)                  | Positive | 568.3 | 6.23 ± 0.01 | 0.46 ± 0.09                    | 0.43 ± 0.12                    | 0.61821187 | 0.48 ± 0.12                    | 0.66 ± 0.12 <sup>*</sup>       | 0.02561064 |
| LPC 22:6 ( <i>sn</i> -2)                  | Positive | 568.3 | 6.29 ± 0.02 | 0.10 ± 0.02                    | (9.3 ± 3.0) × 10 <sup>-2</sup> | 0.54877074 | 0.10 ± 0.03                    | 0.16 ± 0.03 <sup>**</sup>      | 0.00576482 |
| LPC total                                 |          |       |             | 799 ± 64                       | 852 ± 47                       | 0.13648069 | 816 ± 66                       | 720 ± 52 <sup>*</sup>          | 0.01811988 |
| LPE 16:0 ( <i>sn</i> -1 and <i>sn</i> -2) | Positive | 454.3 | 7.39 ± 0.02 | 2.2 ± 0.5                      | 2.0 ± 0.4                      | 0.32685007 | 2.0 ± 0.9                      | 2.0 ± 0.5                      | 0.96212421 |
| LPE 18:0 ( <i>sn</i> -1)                  | Positive | 482.3 | 7.32 ± 0.02 | 7.5 ± 1.6                      | 6.5 ± 0.8                      | 0.19495173 | 7.6 ± 1.2                      | 6.6 ± 1.7                      | 0.24268167 |
| LPE 18:0 ( <i>sn</i> -2)                  | Positive | 482.3 | 7.42 ± 0.02 | 1.6 ± 0.3                      | 1.3 ± 0.3                      | 0.14916369 | 1.6 ± 0.5                      | 1.3 ± 0.4                      | 0.20804767 |
| LPE 18:1 ( <i>sn</i> -1)                  | Positive | 480.3 | 7.39 ± 0.02 | 2.5 ± 0.6                      | 2.2 ± 0.4                      | 0.40533490 | 2.2 ± 0.6                      | 0.55 ± 0.25 <sup>***</sup>     | 0.00008198 |

|                          |          |       |             |             |             |            |             |                 |            |
|--------------------------|----------|-------|-------------|-------------|-------------|------------|-------------|-----------------|------------|
| LPE 18:1 ( <i>sn</i> -2) | Positive | 480.3 | 7.48 ± 0.02 | 0.66 ± 0.33 | 1.1 ± 0.6   | 0.13859435 | 0.63 ± 0.38 | 0.16 ± 0.12 *   | 0.02669492 |
| LPE 18:2 ( <i>sn</i> -1) | Positive | 478.3 | 7.46 ± 0.02 | 7.4 ± 0.4   | 7.9 ± 0.6   | 0.20697592 | 7.3 ± 1.1   | 2.6 ± 0.6 ***   | 0.00000276 |
| LPE 18:2 ( <i>sn</i> -2) | Positive | 478.3 | 7.56 ± 0.02 | 3.1 ± 1.0   | 4.1 ± 2.6   | 0.38546636 | 2.9 ± 0.8   | 1.5 ± 0.5 **    | 0.00492525 |
| LPE total                |          |       |             | 24.9 ± 3.8  | 25.0 ± 4.5  | 0.98994330 | 24.3 ± 3.2  | 14.6 ± 3.1      | 0.00030335 |
| PC 14:0-18:2             | Negative | 788.5 | 5.44 ± 0.04 | 8.2 ± 3.7   | 5.8 ± 3.4   | 0.27174462 | 9.4 ± 3.3   | 1.3 ± 1.3 ***   | 0.00022528 |
| PC 14:1-18:0             | Negative | 790.6 | 5.41 ± 0.02 | 11.4 ± 4.1  | 12.2 ± 3.9  | 0.75674876 | 10.8 ± 2.7  | 6.2 ± 2.9 *     | 0.01651469 |
| PC 14:1-18:2             | Negative | 786.5 | 5.41 ± 0.02 | 20.0 ± 1.7  | 21.4 ± 3.7  | 0.44053005 | 19.9 ± 6.8  | 8.0 ± 2.6 **    | 0.00246465 |
| PC 16:0-16:0             | Negative | 792.6 | 5.39 ± 0.02 | 92.4 ± 13.4 | 79.2 ± 8.4  | 0.06751446 | 100 ± 15    | 73.6 ± 15.2 *   | 0.01230531 |
| PC 16:0-16:1             | Negative | 790.6 | 5.43 ± 0.03 | 18.7 ± 6.2  | 15.7 ± 4.9  | 0.36557151 | 14.7 ± 5.5  | 7.4 ± 2.0 *     | 0.01227847 |
| PC 16:0-18:0             | Negative | 820.6 | 5.39 ± 0.02 | 232 ± 19    | 235 ± 26    | 0.81861941 | 206 ± 38    | 153 ± 12 *      | 0.00830681 |
| PC 16:0-18:1             | Negative | 818.6 | 5.39 ± 0.02 | 979 ± 126   | 1072 ± 105  | 0.19315254 | 969 ± 125   | 572 ± 44 ***    | 0.00002534 |
| PC 16:0-18:2             | Negative | 816.6 | 5.43 ± 0.02 | 1655 ± 124  | 1633 ± 126  | 0.77270848 | 1743 ± 113  | 877 ± 48 ***    | 0.00000001 |
| PC 16:0-18:3             | Negative | 814.6 | 5.46 ± 0.01 | 113 ± 21    | 131 ± 23    | 0.17287984 | 124 ± 21    | 51.4 ± 9.3 ***  | 0.00001302 |
| PC 16:0-20:2             | Negative | 844.6 | 5.43 ± 0.02 | 16.9 ± 6.4  | 15.7 ± 4.6  | 0.71545429 | 11.9 ± 5.1  | 10.7 ± 3.6      | 0.65944274 |
| PC 16:0-20:3             | Negative | 842.6 | 5.43 ± 0.02 | 60.8 ± 10.3 | 67.3 ± 11.0 | 0.31434810 | 55.6 ± 8.2  | 50.5 ± 6.8      | 0.26714577 |
| PC 16:0-20:4             | Negative | 840.6 | 5.43 ± 0.02 | 86.3 ± 9.5  | 94.6 ± 5.5  | 0.09487941 | 86.3 ± 9.8  | 169 ± 35 **     | 0.00025413 |
| PC 16:0-20:5             | Negative | 838.6 | 5.47 ± 0.02 | 2.8 ± 1.5   | 2.4 ± 0.9   | 0.60833019 | 2.8 ± 0.7   | 168 ± 43 ***    | 0.00000274 |
| PC 16:0-22:3             | Negative | 870.6 | 5.44 ± 0.02 | 2.0 ± 1.1   | 2.7 ± 1.6   | 0.37295445 | 2.8 ± 1.4   | 4.6 ± 2.9       | 0.22292745 |
| PC 16:0-22:4             | Negative | 868.6 | 5.45 ± 0.01 | 11.9 ± 5.0  | 17.3 ± 4.8  | 0.08570088 | 11.8 ± 4.7  | 48.5 ± 12.2 *** | 0.00004411 |
| PC 16:0-22:5             | Negative | 866.6 | 5.46 ± 0.02 | 18.3 ± 6.4  | 21.1 ± 6.9  | 0.48601220 | 20.6 ± 4.8  | 126 ± 18 ***    | 0.00000008 |
| PC 16:0-22:6             | Negative | 864.6 | 5.47 ± 0.02 | 4.2 ± 3.3   | 3.6 ± 1.9   | 0.71757771 | 3.3 ± 1.5   | 4.2 ± 3.1       | 0.50744920 |
| PC 16:1-18:0             | Negative | 818.6 | 5.41 ± 0.02 | 7.7 ± 3.0   | 8.7 ± 2.8   | 0.56395417 | 8.3 ± 2.0   | 5.9 ± 2.9       | 0.12990525 |

|              |          |       |             |             |             |            |             |                            |            |
|--------------|----------|-------|-------------|-------------|-------------|------------|-------------|----------------------------|------------|
| PC 16:1-18:1 | Negative | 816.6 | 5.42 ± 0.02 | 23.7 ± 4.4  | 23.7 ± 5.3  | 0.98884101 | 25.4 ± 3.8  | 10.3 ± 2.7 <sup>***</sup>  | 0.00001155 |
| PC 16:1-18:2 | Negative | 814.6 | 5.46 ± 0.02 | 56.9 ± 7.5  | 48.9 ± 10.4 | 0.15867805 | 61.1 ± 9.3  | 21.9 ± 4.1 <sup>***</sup>  | 0.00000263 |
| PC 16:1-18:3 | Negative | 812.5 | 5.49 ± 0.02 | 2.0 ± 1.4   | 2.0 ± 1.4   | 0.99853909 | 2.5 ± 1.9   | 1.3 ± 0.8                  | 0.27002098 |
| PC 16:1-20:4 | Negative | 838.6 | 5.43 ± 0.04 | 2.7 ± 2.5   | 1.2 ± 0.9   | 0.23850895 | 1.9 ± 1.3   | 0.79 ± 0.44                | 0.08732020 |
| PC 18:0-18:0 | Negative | 848.6 | 5.38 ± 0.02 | 103 ± 9     | 108 ± 13    | 0.40112188 | 89.7 ± 14.2 | 55.7 ± 5.8 <sup>***</sup>  | 0.00028450 |
| PC 18:0-18:1 | Negative | 846.6 | 5.41 ± 0.02 | 829 ± 63    | 848 ± 54    | 0.59408985 | 755 ± 100   | 429 ± 17 <sup>***</sup>    | 0.00001320 |
| PC 18:0-18:2 | Negative | 844.6 | 5.41 ± 0.02 | 1847 ± 127  | 1758 ± 104  | 0.21521337 | 1822 ± 111  | 1044 ± 53 <sup>***</sup>   | 0.00000003 |
| PC 18:0-18:3 | Negative | 842.6 | 5.44 ± 0.02 | 77.3 ± 13.5 | 96.2 ± 19.7 | 0.08232542 | 87.8 ± 20.9 | 32.1 ± 3.3 <sup>**</sup>   | 0.00007224 |
| PC 18:0-18:4 | Negative | 840.6 | 5.42 ± 0.02 | 5.9 ± 4.0   | 5.4 ± 3.0   | 0.80156875 | 4.3 ± 3.3   | 6.7 ± 2.4                  | 0.17462174 |
| PC 18:0-20:0 | Negative | 876.7 | 5.41 ± 0.02 | 2.4 ± 2.1   | 2.0 ± 1.2   | 0.65058929 | 2.2 ± 1.0   | 2.0 ± 1.6                  | 0.79443415 |
| PC 18:0-20:2 | Negative | 872.6 | 5.41 ± 0.02 | 15.4 ± 6.3  | 25.1 ± 8.9  | 0.05519947 | 12.9 ± 5.7  | 8.3 ± 2.8                  | 0.10676947 |
| PC 18:0-20:3 | Negative | 870.6 | 5.41 ± 0.02 | 77.4 ± 17.1 | 79.1 ± 13.7 | 0.85501946 | 68.1 ± 9.0  | 68.5 ± 16.4                | 0.95444824 |
| PC 18:0-20:4 | Negative | 868.6 | 5.41 ± 0.02 | 121 ± 18    | 127 ± 25    | 0.66643549 | 123 ± 25    | 217 ± 41 <sup>***</sup>    | 0.00066549 |
| PC 18:0-20:5 | Negative | 866.6 | 5.44 ± 0.02 | 3.4 ± 1.6   | 3.2 ± 0.9   | 0.87533855 | 3.7 ± 1.3   | 183 ± 39 <sup>***</sup>    | 0.00000057 |
| PC 18:0-22:3 | Negative | 898.7 | 5.41 ± 0.02 | 2.0 ± 1.6   | 2.6 ± 1.6   | 0.59676237 | 0.63 ± 0.19 | 4.5 ± 1.6 <sup>**</sup>    | 0.00044667 |
| PC 18:0-22:4 | Negative | 896.6 | 5.43 ± 0.03 | 11.4 ± 3.2  | 13.3 ± 2.0  | 0.24750042 | 8.4 ± 4.0   | 34.6 ± 5.3 <sup>***</sup>  | 0.00000222 |
| PC 18:0-22:5 | Negative | 894.6 | 5.44 ± 0.02 | 14.1 ± 4.3  | 12.5 ± 4.7  | 0.55079901 | 12.6 ± 3.5  | 83.5 ± 15.0 <sup>***</sup> | 0.00000053 |
| PC 18:0-22:6 | Negative | 892.6 | 5.44 ± 0.02 | 2.9 ± 2.8   | 3.5 ± 2.7   | 0.72522735 | 2.1 ± 1.1   | 4.9 ± 3.2                  | 0.06488521 |
| PC 18:1-18:1 | Negative | 844.6 | 5.44 ± 0.02 | 117 ± 17    | 123 ± 19    | 0.59299950 | 105 ± 15    | 45.5 ± 4.9 <sup>***</sup>  | 0.00000369 |
| PC 18:1-18:2 | Negative | 842.6 | 5.46 ± 0.02 | 529 ± 20    | 538 ± 49    | 0.71093423 | 514 ± 59    | 162 ± 9 <sup>***</sup>     | 0.00000005 |
| PC 18:1-18:3 | Negative | 840.6 | 5.48 ± 0.02 | 36.3 ± 11.2 | 45.4 ± 4.2  | 0.08813838 | 40.1 ± 12.8 | 9.1 ± 3.4 <sup>**</sup>    | 0.00018610 |
| PC 18:1-20:4 | Negative | 866.6 | 5.46 ± 0.02 | 19.8 ± 7.9  | 19.9 ± 5.2  | 0.97783133 | 15.8 ± 6.2  | 20.5 ± 6.3                 | 0.21847039 |

|                                  |          |       |             |             |                           |                      |             |                           |            |
|----------------------------------|----------|-------|-------------|-------------|---------------------------|----------------------|-------------|---------------------------|------------|
| PC 18:1-20:5                     | Negative | 864.6 | 5.48 ± 0.01 | n.d.        | n.d.                      |                      | n.d.        | 21.6 ± 7.8                |            |
| PC 18:2-18:2                     | Negative | 840.6 | 5.47 ± 0.02 | 399 ± 16    | 376 ± 30                  | 0.12655587           | 394 ± 47    | 102 ± 14 <sup>***</sup>   | 0.00000005 |
| PC 18:2-18:3                     | Negative | 838.6 | 5.50 ± 0.01 | 74.1 ± 9.6  | 69.9 ± 14.5               | 0.57205125           | 71.3 ± 9.0  | 23.6 ± 7.8 <sup>***</sup> | 0.00000188 |
| PC 18:2-20:0                     | Negative | 872.6 | 5.33 ± 0.02 | 44.4 ± 5.3  | 24.3 ± 7.0 <sup>***</sup> | 2.3×10 <sup>-4</sup> | 37.2 ± 11.2 | 8.6 ± 4.1 <sup>***</sup>  | 0.00015270 |
| PC 18:2-20:1                     | Negative | 870.6 | 5.45 ± 0.02 | 7.4 ± 1.8   | 8.2 ± 2.8                 | 0.53998873           | 4.8 ± 3.8   | 2.4 ± 0.8                 | 0.15951241 |
| PC 18:2-20:2                     | Negative | 868.6 | 5.45 ± 0.02 | 14.0 ± 3.7  | 15.7 ± 5.6                | 0.53830320           | 9.2 ± 1.7   | 2.9 ± 1.7 <sup>***</sup>  | 0.00008349 |
| PC 18:2-20:3                     | Negative | 866.6 | 5.48 ± 0.02 | 22.3 ± 5.4  | 22.7 ± 3.1                | 0.87188556           | 21.4 ± 5.3  | 6.7 ± 3.2 <sup>***</sup>  | 0.00017362 |
| PC 18:2-20:4                     | Negative | 864.6 | 5.49 ± 0.02 | 33.9 ± 9.3  | 33.7 ± 7.8                | 0.96567153           | 35.1 ± 8.4  | 22.8 ± 3.6 <sup>**</sup>  | 0.00778687 |
| PC 18:2-20:5                     | Negative | 862.6 | 5.51 ± 0.01 | n.d.        | n.d.                      |                      | n.d.        | 25.7 ± 4.1                |            |
| PC total                         |          |       |             | 7834 ± 400  | 7874 ± 510                | 0.88187082           | 7730 ± 697  | 4998 ± 315 <sup>***</sup> | 0.00000531 |
| PC 16:0e-16:0                    | Positive | 720.6 | 5.33 ± 0.01 | 6.8 ± 1.3   | 3.3 ± 2.3 <sup>*</sup>    | 0.01232171           | 3.5 ± 2.9   | 2.4 ± 1.6                 | 0.57511892 |
| PC 16:0e-18:2                    | Positive | 744.6 | 5.37 ± 0.02 | 37.9 ± 4.7  | 25.9 ± 3.6 <sup>***</sup> | 0.00059851           | 33.8 ± 7.5  | 14.1 ± 4.0 <sup>***</sup> | 0.00020513 |
| PC 16:0e-20:4                    | Positive | 768.6 | 5.38 ± 0.01 | 14.3 ± 3.4  | 11.1 ± 2.1                | 0.08045555           | 11.2 ± 4.3  | 5.4 ± 2.6 <sup>*</sup>    | 0.01707430 |
| PC 16:1e-16:0 / PC<br>16:0p-16:0 | Positive | 718.6 | 5.38 ± 0.02 | 30.6 ± 3.9  | 25.4 ± 6.2                | 0.11330472           | 25.0 ± 4.3  | 17.2 ± 2.4 <sup>**</sup>  | 0.00319235 |
| PC 16:1e-18:1 / PC<br>16:0p-18:1 | Positive | 744.6 | 5.38 ± 0.01 | 122 ± 20    | 103 ± 14                  | 0.07738251           | 113 ± 11    | 103 ± 13                  | 0.16954039 |
| PC 16:1e-18:2 / PC<br>16:0p-18:2 | Positive | 742.6 | 5.41 ± 0.01 | 66.3 ± 14.1 | 56.9 ± 12.1               | 0.24309863           | 76.2 ± 9.9  | 60.5 ± 8.9 <sup>*</sup>   | 0.01604548 |
| PC 16:1e-20:4 / PC<br>16:0p-20:4 | Positive | 766.6 | 5.42 ± 0.01 | 64.7 ± 7.3  | 52.5 ± 6.1 <sup>*</sup>   | 0.01067697           | 71.6 ± 11.9 | 51.1 ± 10.8 <sup>*</sup>  | 0.01066177 |
| PC 16:1e-20:5 / PC               | Positive | 764.6 | 5.45 ± 0.02 | 1.0 ± 0.8   | 1.2 ± 0.5                 | 0.80510977           | n.d.        | 26.4 ± 4.6                |            |

|                    |          |       |             |             |                          |            |             |                           |            |  |
|--------------------|----------|-------|-------------|-------------|--------------------------|------------|-------------|---------------------------|------------|--|
| 16:0p-20:5         |          |       |             |             |                          |            |             |                           |            |  |
| PC 16:1e-22:5 / PC | Positive | 792.6 | 5.44 ± 0.01 | 10.4 ± 1.2  | 9.1 ± 4.0                | 0.47727123 | 8.8 ± 3.4   | 28.9 ± 8.6 <sup>***</sup> | 0.00034153 |  |
| 16:0p-22:5         |          |       |             |             |                          |            |             |                           |            |  |
| PC 16:1p-20:5      | Positive | 762.5 | 5.38 ± 0.01 | 16.2 ± 2.6  | 18.2 ± 7.0               | 0.53326057 | 16.0 ± 5.8  | 13.9 ± 4.2                | 0.47684892 |  |
| PC 18:0e-18:1      | Positive | 774.6 | 5.39 ± 0.02 | 7.0 ± 3.6   | 7.1 ± 1.1                | 0.94775622 | 10.1 ± 4.3  | 3.8 ± 2.2 <sup>**</sup>   | 0.00932371 |  |
| PC 18:0e-18:2      | Positive | 772.6 | 5.42 ± 0.02 | 38.3 ± 6.8  | 26.6 ± 6.0 <sup>**</sup> | 0.00953999 | 44.7 ± 8.0  | 20.3 ± 4.5 <sup>***</sup> | 0.00006795 |  |
| PC 18:0e-20:4      | Positive | 796.6 | 5.38 ± 0.04 | 7.6 ± 1.8   | 6.9 ± 2.5                | 0.61074487 | 7.4 ± 4.8   | 3.7 ± 2.0                 | 0.11067120 |  |
| PC 18:1e-18:2 / PC |          |       |             |             |                          |            |             |                           |            |  |
| 18:0p-18:2         | Positive | 770.6 | 5.38 ± 0.01 | 24.8 ± 4.7  | 24.7 ± 6.1               | 0.96196844 | 25.2 ± 5.3  | 13.3 ± 4.1 <sup>**</sup>  | 0.00134970 |  |
| PC 18:1e-20:4 / PC |          |       |             |             |                          |            |             |                           |            |  |
| 18:0p-20:4         | Positive | 794.6 | 5.39 ± 0.02 | 32.9 ± 5.6  | 28.0 ± 5.4               | 0.15468492 | 31.8 ± 10.4 | 17.2 ± 4.8 <sup>*</sup>   | 0.01033804 |  |
| PC 18:1e-20:5 / PC |          |       |             |             |                          |            |             |                           |            |  |
| 18:0p-20:5         | Positive | 792.6 | 5.41 ± 0.01 | 2.3 ± 0.3   | 1.9 ± 1.3                | 0.63049349 | 1.9 ± 1.2   | 13.5 ± 3.6 <sup>***</sup> | 0.00001719 |  |
| PC 18:2p-20:5      | Positive | 788.6 | 5.38 ± 0.01 | 192 ± 10    | 206 ± 20                 | 0.17474175 | 178 ± 31    | 107 ± 17 <sup>***</sup>   | 0.00057831 |  |
| PC 18:2p-20:4      | Positive | 790.6 | 5.39 ± 0.03 | 5.6 ± 0.9   | 5.3 ± 2.0                | 0.76060697 | 5.9 ± 2.3   | 1.6 ± 1.4 <sup>**</sup>   | 0.00279858 |  |
| Ether PC total     |          |       |             | 679 ± 50    | 612 ± 61                 | 0.06317305 | 664 ± 57    | 501 ± 28 <sup>***</sup>   | 0.00009909 |  |
| PE 16:0-18:1       | Negative | 716.5 | 6.10 ± 0.02 | 8.1 ± 4.3   | 11.4 ± 4.8               | 0.23758867 | 7.1 ± 4.1   | 1.7 ± 1.2 <sup>*</sup>    | 0.01001288 |  |
| PE 16:0-18:2       | Negative | 714.5 | 6.21 ± 0.06 | 47.6 ± 14.4 | 43.1 ± 10.2              | 0.54305981 | 37.6 ± 9.6  | 11.2 ± 3.8 <sup>***</sup> | 0.00009157 |  |
| PE 16:0-20:4       | Negative | 738.5 | 6.22 ± 0.06 | 11.1 ± 3.3  | 8.4 ± 1.8                | 0.10564726 | 9.0 ± 2.7   | 3.0 ± 1.1 <sup>***</sup>  | 0.00041539 |  |
| PE 16:0-22:5       | Negative | 764.5 | 6.27 ± 0.07 | 1.7 ± 0.8   | 1.5 ± 0.4                | 0.48216659 | 1.7 ± 1.8   | 13.0 ± 3.4 <sup>***</sup> | 0.00002970 |  |
| PE 16:1-18:1       | Negative | 714.5 | 6.07 ± 0.01 | 4.7 ± 2.0   | 5.1 ± 0.5                | 0.58099482 | 4.0 ± 1.2   | 2.0 ± 0.8 <sup>**</sup>   | 0.00635496 |  |
| PE 16:1-18:2       | Negative | 712.5 | 6.09 ± 0.01 | 32.9 ± 11.2 | 31.4 ± 9.0               | 0.80610791 | 24.7 ± 5.6  | 13.5 ± 6.0 <sup>**</sup>  | 0.00727000 |  |



|               |          |       |             |             |             |            |             |                            |            |
|---------------|----------|-------|-------------|-------------|-------------|------------|-------------|----------------------------|------------|
| PE 16:1-20:4  | Negative | 736.5 | 6.10 ± 0.02 | 6.4 ± 1.5   | 6.1 ± 1.7   | 0.75448708 | 5.6 ± 1.8   | 2.6 ± 1.3 <sup>**</sup>    | 0.00796482 |
| PE 16:1-20:5  | Negative | 734.5 | 5.80 ± 0.00 | n.d.        | n.d.        |            | n.d.        | 5.2 ± 2.9                  |            |
| PE 18:0-18:1  | Negative | 744.6 | 6.08 ± 0.01 | 18.4 ± 7.0  | 17.7 ± 4.7  | 0.83952450 | 16.3 ± 4.7  | 5.1 ± 1.1 <sup>**</sup>    | 0.00019928 |
| PE 18:0-18:2  | Negative | 742.5 | 6.13 ± 0.04 | 180 ± 39    | 159 ± 22    | 0.27429388 | 164 ± 38    | 49 ± 14 <sup>***</sup>     | 0.00004052 |
| PE 18:0-18:3  | Negative | 740.5 | 6.23 ± 0.05 | 9.3 ± 3.7   | 6.1 ± 1.5   | 0.07573067 | 8.2 ± 2.0   | 2.2 ± 0.7 <sup>***</sup>   | 0.00003597 |
| PE 18:0-20:4  | Negative | 766.5 | 6.14 ± 0.05 | 61.3 ± 11.0 | 63.3 ± 6.6  | 0.70810785 | 54.2 ± 12.5 | 23.4 ± 2.7 <sup>**</sup>   | 0.00015010 |
| PE 18:0-20:5  | Negative | 764.5 | 6.08 ± 0.23 | n.d.        | n.d.        |            | n.d.        | 26.8 ± 5.6                 |            |
| PE 18:0-22:5  | Negative | 792.6 | 6.20 ± 0.07 | 1.5 ± 0.5   | 1.8 ± 0.9   | 0.47449296 | 0.74 ± 0.40 | 15.6 ± 6.8 <sup>**</sup>   | 0.00034741 |
| PE 18:1-18:1  | Negative | 742.5 | 6.11 ± 0.04 | 5.5 ± 1.9   | 7.3 ± 1.1   | 0.06629617 | 4.4 ± 3.1   | 0.60 ± 0.43 <sup>*</sup>   | 0.01420862 |
| PE 18:1-18:2  | Negative | 740.5 | 6.21 ± 0.08 | 26.7 ± 6.6  | 32.3 ± 6.9  | 0.17962900 | 21.3 ± 7.5  | 3.9 ± 1.2 <sup>**</sup>    | 0.00022113 |
| PE 18:1-20:4  | Negative | 764.5 | 6.21 ± 0.08 | 3.6 ± 0.8   | 4.4 ± 1.3   | 0.21025078 | 3.2 ± 1.6   | 0.8 ± 0.3 <sup>*</sup>     | 0.00853859 |
| PE 18:1-20:5  | Negative | 762.5 | 6.32 ± 0.03 | n.d.        | n.d.        |            | n.d.        | 1.2 ± 0.7                  |            |
| PE 18:2-18:2  | Negative | 738.5 | 6.30 ± 0.03 | 10.3 ± 2.4  | 8.2 ± 2.3   | 0.15045940 | 10.4 ± 2.6  | 1.2 ± 0.8 <sup>***</sup>   | 0.00000900 |
| PE total      |          |       |             | 429 ± 97    | 407 ± 64    | 0.65082500 | 372 ± 82    | 182 ± 28 <sup>**</sup>     | 0.00031262 |
| PE 16:0p-16:0 | Positive | 676.5 | 6.07 ± 0.01 | 3.9 ± 3.1   | 4.4 ± 3.2   | 0.79721858 | 3.1 ± 2.1   | 3.5 ± 2.3                  | 0.74549000 |
| PE 16:0p-16:1 | Positive | 674.5 | 6.10 ± 0.02 | 0.86 ± 0.67 | 1.5 ± 1.0   | 0.23066412 | 0.61 ± 0.34 | 0.48 ± 0.29                | 0.51270055 |
| PE 16:0p-18:1 | Positive | 702.5 | 6.08 ± 0.01 | 40.2 ± 13.8 | 38.0 ± 8.1  | 0.74046184 | 37.9 ± 10.8 | 29.4 ± 8.3                 | 0.15540169 |
| PE 16:0p-18:2 | Positive | 700.5 | 6.10 ± 0.01 | 229 ± 110   | 219 ± 75    | 0.84813862 | 197 ± 71    | 143 ± 65                   | 0.20120678 |
| PE 16:0p-18:3 | Positive | 698.5 | 6.21 ± 0.05 | 13.2 ± 7.1  | 12.3 ± 5.1  | 0.80333280 | 12.2 ± 5.6  | 7.6 ± 4.1                  | 0.13027391 |
| PE 16:0p-20:3 | Positive | 726.5 | 6.10 ± 0.01 | 2.6 ± 0.7   | 3.3 ± 0.8   | 0.10210550 | 2.7 ± 1.2   | 1.9 ± 1.2                  | 0.23276333 |
| PE 16:0p-20:4 | Positive | 724.5 | 6.11 ± 0.01 | 40.4 ± 8.3  | 41.6 ± 2.7  | 0.74359460 | 42.6 ± 7.9  | 32.8 ± 5.6 <sup>*</sup>    | 0.03164516 |
| PE 16:0p-20:5 | Positive | 722.5 | 6.23 ± 0.04 | 1.5 ± 1.0   | 0.64 ± 0.31 | 0.11137937 | 1.3 ± 0.9   | 91.6 ± 31.2 <sup>***</sup> | 0.00003348 |

|               |          |       |             |             |                         |            |             |                           |            |
|---------------|----------|-------|-------------|-------------|-------------------------|------------|-------------|---------------------------|------------|
| PE 16:0p-22:4 | Positive | 752.6 | 6.12 ± 0.05 | 8.4 ± 2.1   | 8.2 ± 1.6               | 0.87365841 | 8.3 ± 1.3   | 1.4 ± 0.8 <sup>***</sup>  | 0.00000063 |
| PE 16:0p-22:5 | Positive | 750.5 | 6.17 ± 0.07 | 22.1 ± 2.4  | 21.7 ± 2.1              | 0.72972907 | 20.4 ± 3.6  | 31.0 ± 6.5 <sup>**</sup>  | 0.00574274 |
| PE 16:0p-22:6 | Positive | 748.5 | 6.22 ± 0.05 | 10.4 ± 1.4  | 8.0 ± 0.8 <sup>**</sup> | 0.00403605 | 10.0 ± 2.4  | 13.3 ± 3.0                | 0.05790982 |
| PE 16:1p-20:2 | Positive | 726.5 | 6.11 ± 0.03 | 1.2 ± 0.7   | 1.4 ± 0.5               | 0.49438540 | 1.4 ± 0.6   | 0.68 ± 0.54               | 0.07058813 |
| PE 16:1p-22:2 | Positive | 754.6 | 6.08 ± 0.01 | 3.6 ± 1.2   | 2.7 ± 1.0               | 0.20742569 | 2.9 ± 1.2   | 1.2 ± 0.5 <sup>*</sup>    | 0.01103157 |
| PE 16:1p-22:3 | Positive | 752.6 | 6.14 ± 0.04 | 0.84 ± 0.36 | 1.0 ± 0.4               | 0.37347474 | 0.82 ± 0.33 | 0.37 ± 0.24               | 0.05010158 |
| PE 18:0p-16:0 | Positive | 704.6 | 6.05 ± 0.01 | 3.8 ± 2.6   | 4.7 ± 1.7               | 0.50065082 | 3.3 ± 1.2   | 3.7 ± 1.3                 | 0.56717442 |
| PE 18:0p-16:1 | Positive | 702.5 | 6.08 ± 0.01 | 2.4 ± 0.8   | 2.5 ± 0.9               | 0.91640323 | 1.9 ± 0.4   | 1.1 ± 0.9                 | 0.10516347 |
| PE 18:0p-18:1 | Positive | 730.6 | 6.07 ± 0.01 | 59.7 ± 14.2 | 63.7 ± 9.7              | 0.57632563 | 52.9 ± 9.0  | 33.4 ± 7.0 <sup>**</sup>  | 0.00182286 |
| PE 18:0p-18:2 | Positive | 728.6 | 6.08 ± 0.01 | 502 ± 103   | 513 ± 67                | 0.82824433 | 417 ± 43    | 236 ± 38 <sup>***</sup>   | 0.00001646 |
| PE 18:0p-18:3 | Positive | 726.5 | 6.12 ± 0.02 | 31.4 ± 6.2  | 34.7 ± 3.9              | 0.29841190 | 27.6 ± 5.3  | 14.6 ± 3.8 <sup>***</sup> | 0.00065315 |
| PE 18:0p-20:3 | Positive | 754.6 | 6.08 ± 0.01 | 5.9 ± 1.1   | 7.3 ± 0.5 <sup>*</sup>  | 0.02251702 | 4.6 ± 1.0   | 3.2 ± 1.1 <sup>*</sup>    | 0.04227053 |
| PE 18:0p-20:4 | Positive | 752.6 | 6.08 ± 0.01 | 71.5 ± 7.3  | 67.8 ± 6.6              | 0.38423331 | 62.9 ± 5.2  | 53.9 ± 11.4               | 0.10793482 |
| PE 18:0p-20:5 | Positive | 750.5 | 6.14 ± 0.04 | 2.9 ± 1.2   | 2.9 ± 0.7               | 0.96264458 | 2.6 ± 1.1   | 162 ± 41 <sup>***</sup>   | 0.00000221 |
| PE 18:0p-22:4 | Positive | 780.6 | 6.08 ± 0.01 | 6.3 ± 1.5   | 5.4 ± 0.7               | 0.20807198 | 5.0 ± 1.3   | 1.4 ± 0.7 <sup>***</sup>  | 0.00011897 |
| PE 18:0p-22:5 | Positive | 778.6 | 6.10 ± 0.01 | 19.0 ± 1.6  | 17.6 ± 1.8              | 0.19229091 | 17.4 ± 1.4  | 32.2 ± 4.7 <sup>***</sup> | 0.00002183 |
| PE 18:0p-22:6 | Positive | 776.6 | 6.12 ± 0.03 | 10.0 ± 1.7  | 10.4 ± 0.7              | 0.66494360 | 8.3 ± 2.2   | 12.9 ± 2.7 <sup>**</sup>  | 0.00818941 |
| PE 18:1p-16:0 | Positive | 702.5 | 6.08 ± 0.01 | 11.4 ± 7.5  | 12.6 ± 3.4              | 0.72308601 | 7.7 ± 2.9   | 7.0 ± 2.8                 | 0.64998373 |
| PE 18:1p-18:1 | Positive | 728.6 | 6.08 ± 0.01 | 36.7 ± 12.8 | 45.0 ± 7.1              | 0.19266056 | 30.2 ± 8.9  | 22.6 ± 4.0                | 0.08396482 |
| PE 18:1p-18:2 | Positive | 726.5 | 6.11 ± 0.02 | 203 ± 85    | 220 ± 43                | 0.67869194 | 151 ± 26    | 92.5 ± 17.8 <sup>**</sup> | 0.00109398 |
| PE 18:1p-18:3 | Positive | 724.5 | 6.25 ± 0.03 | 12.5 ± 6.9  | 11.5 ± 2.9              | 0.73696610 | 8.2 ± 3.3   | 4.7 ± 1.9 <sup>*</sup>    | 0.04781206 |
| PE 18:1p-20:3 | Positive | 752.6 | 6.13 ± 0.05 | 2.2 ± 1.2   | 2.9 ± 0.5               | 0.23217977 | 1.5 ± 0.9   | 0.88 ± 0.33               | 0.17863784 |

|               |          |       |              |                                |                                |            |                                |                                |            |
|---------------|----------|-------|--------------|--------------------------------|--------------------------------|------------|--------------------------------|--------------------------------|------------|
| PE 18:1p-20:4 | Positive | 750.5 | 6.14 ± 0.04  | 32.8 ± 4.6                     | 36.9 ± 6.0                     | 0.20708319 | 29.6 ± 3.8                     | 21.9 ± 5.0 *                   | 0.01381148 |
| PE 18:1p-20:5 | Positive | 748.5 | 6.26 ± 0.03  | 1.0 ± 0.4                      | 0.63 ± 0.38                    | 0.14225214 | 0.69 ± 0.45                    | 82.1 ± 17.0 ***                | 0.00000036 |
| PE 18:1p-22:4 | Positive | 778.6 | 6.13 ± 0.05  | 1.9 ± 0.4                      | 2.5 ± 0.7                      | 0.09598330 | 2.2 ± 0.6                      | 0.32 ± 0.26 ***                | 0.00048165 |
| PE 18:1p-22:5 | Positive | 776.6 | 6.20 ± 0.07  | 7.6 ± 1.7                      | 7.5 ± 1.9                      | 0.89524307 | 6.5 ± 2.3                      | 14.7 ± 1.6 ***                 | 0.00002480 |
| PE 18:1p-22:6 | Positive | 774.5 | 6.26 ± 0.04  | 5.4 ± 1.0                      | 4.1 ± 0.5 *                    | 0.01734112 | 3.9 ± 1.3                      | 6.9 ± 2.2 *                    | 0.01529133 |
| PE 18:2p-18:1 | Positive | 726.5 | 6.12 ± 0.04  | 1.5 ± 0.7                      | 2.0 ± 0.4                      | 0.19202386 | 1.3 ± 0.8                      | 0.46 ± 0.28 *                  | 0.03441169 |
| PE 18:2p-18:2 | Positive | 724.5 | 6.24 ± 0.04  | 13.9 ± 3.2                     | 11.4 ± 3.2                     | 0.22096573 | 10.4 ± 2.6                     | 3.9 ± 1.0 ***                  | 0.00023135 |
| PE 18:2p-20:4 | Positive | 748.5 | 6.25 ± 0.02  | 2.7 ± 1.4                      | 1.7 ± 0.4                      | 0.13324558 | 2.1 ± 0.8                      | 1.1 ± 0.6 *                    | 0.02750428 |
| PE 18:2p-20:5 | Positive | 746.5 | 6.33 ± 0.02  | n.d.                           | n.d.                           |            | n.d.                           | 2.5 ± 0.7                      |            |
| PE 18:2p-22:2 | Positive | 780.6 | 6.10 ± 0.02  | 0.31 ± 0.30                    | 0.66 ± 0.39                    | 0.11193746 | 0.57 ± 0.39                    | 0.75 ± 0.39                    | 0.49730270 |
| PEpln total   |          |       |              | 1426 ± 378                     | 1452 ± 212                     | 0.88393090 | 1200 ± 163                     | 1175 ± 179                     | 0.80717449 |
| PI 16:0-18:2  | Negative | 833.5 | 11.98 ± 0.02 | 5011 ± 1263                    | 3444 ± 726 *                   | 0.02495163 | 2501 ± 549                     | 1125 ± 259 ***                 | 0.00024328 |
| PI 18:0-18:1  | Negative | 863.6 | 11.84 ± 0.03 | 7588 ± 1783                    | 7083 ± 1809                    | 0.63675600 | 3434 ± 681                     | 1448 ± 242 ***                 | 0.00005160 |
| PI 18:0-18:2  | Negative | 861.5 | 11.89 ± 0.02 | 27810 ± 4795                   | 21272 ± 4290 *                 | 0.03204158 | 14029 ± 1504                   | 7267 ± 595 ***                 | 0.00000128 |
| PI 18:0-20:2  | Negative | 889.6 | 11.84 ± 0.02 | 1133 ± 371                     | 1262 ± 434                     | 0.59063144 | 367 ± 54                       | 78.5 ± 36.1 ***                | 0.00000077 |
| PI 18:0-20:3  | Negative | 887.6 | 11.88 ± 0.03 | 1902 ± 315                     | 1642 ± 534                     | 0.32747006 | 789 ± 148                      | 394 ± 66 ***                   | 0.00013996 |
| PI 18:0-20:4  | Negative | 885.5 | 11.90 ± 0.02 | 8710 ± 1324                    | 6973 ± 1506                    | 0.05997466 | 4624 ± 509                     | 3527 ± 511 **                  | 0.00395214 |
| PI 18:0-20:5  | Negative | 883.5 | 11.94 ± 0.04 | 66.2 ± 46.0                    | 54.0 ± 23.0                    | 0.57352684 | 16.0 ± 16.4                    | 1754 ± 541 ***                 | 0.00001361 |
| PI 18:1-18:1  | Negative | 861.5 | 11.89 ± 0.02 | 581 ± 173                      | 492 ± 164                      | 0.37978571 | 260 ± 88                       | 45.8 ± 14.7 **                 | 0.00015221 |
| PI total      |          |       |              | 52800 ± 8755                   | 42221 ± 9044                   | 0.06652109 | 26019 ± 3072                   | 15639 ± 1745 ***               | 0.00002939 |
| SM d18:1-14:0 | Positive | 675.5 | 5.84 ± 0.01  | 0.68 ± 0.05                    | 0.59 ± 0.04 **                 | 0.00537244 | 0.60 ± 0.10                    | 0.66 ± 0.09                    | 0.28374626 |
| SM d18:1-14:1 | Positive | 673.5 | 5.88 ± 0.01  | (3.2 ± 0.9) × 10 <sup>-2</sup> | (3.5 ± 0.6) × 10 <sup>-2</sup> | 0.46658906 | (3.3 ± 0.9) × 10 <sup>-2</sup> | (3.7 ± 0.7) × 10 <sup>-2</sup> | 0.45387791 |

|                |          |       |             |                                |                                |            |                                |                                   |            |
|----------------|----------|-------|-------------|--------------------------------|--------------------------------|------------|--------------------------------|-----------------------------------|------------|
| SM d18:1-16:0  | Positive | 703.6 | 5.81 ± 0.01 | 58.1 ± 4.9                     | 59.3 ± 1.7                     | 0.57836898 | 54.8 ± 4.0                     | 64.0 ± 5.6 **                     | 0.00854087 |
| SM d18:1-16:1  | Positive | 701.6 | 5.85 ± 0.01 | 3.7 ± 0.3                      | 3.1 ± 0.2 **                   | 0.00395563 | 3.1 ± 0.6                      | 3.9 ± 0.4 *                       | 0.02112991 |
| SM d18:1-18:0  | Positive | 731.6 | 5.78 ± 0.01 | 14.2 ± 0.5                     | 16.2 ± 1.2 **                  | 0.00435569 | 13.4 ± 1.6                     | 15.5 ± 0.9 *                      | 0.01565729 |
| SM d18:1-18:1  | Positive | 729.6 | 5.82 ± 0.01 | 3.8 ± 0.4                      | 3.9 ± 0.3                      | 0.81579107 | 3.4 ± 0.6                      | 4.1 ± 0.3 *                       | 0.01606589 |
| SM d18:1-18:2  | Positive | 727.6 | 5.84 ± 0.01 | (7.3 ± 1.3) × 10 <sup>-2</sup> | (6.0 ± 1.1) × 10 <sup>-2</sup> | 0.08513545 | (6.2 ± 1.5) × 10 <sup>-2</sup> | (8.1 ± 1.5) × 10 <sup>-2</sup>    | 0.05414837 |
| SM d18:1-18:3  | Positive | 725.6 | 5.87 ± 0.01 | (6.1 ± 1.9) × 10 <sup>-3</sup> | (5.0 ± 1.3) × 10 <sup>-3</sup> | 0.26272716 | (6.1 ± 2.4) × 10 <sup>-3</sup> | (7.2 ± 5.2) × 10 <sup>-3</sup>    | 0.64618746 |
| SM d18:1-20:0  | Positive | 759.6 | 5.76 ± 0.01 | 5.8 ± 0.3                      | 5.5 ± 0.5                      | 0.11270202 | 5.3 ± 0.6                      | 6.4 ± 0.3 **                      | 0.00309547 |
| SM d18:1-20:1  | Positive | 757.6 | 5.79 ± 0.01 | 2.9 ± 0.2                      | 3.4 ± 0.4 *                    | 0.02409410 | 2.9 ± 0.3                      | 3.4 ± 0.2 *                       | 0.01123738 |
| SM d18:1-20:2  | Positive | 755.6 | 5.82 ± 0.01 | 0.11 ± 0.02                    | 0.11 ± 0.01                    | 0.86857156 | (8.7 ± 2.0) × 10 <sup>-2</sup> | 0.14 ± 0.02 **                    | 0.00249765 |
| SM d18:1-20:3  | Positive | 753.6 | 5.86 ± 0.02 | (9.8 ± 2.4) × 10 <sup>-3</sup> | (1.4 ± 0.4) × 10 <sup>-2</sup> | 0.06180254 | (7.2 ± 4.4) × 10 <sup>-3</sup> | (3.5 ± 1.1) × 10 <sup>-2***</sup> | 0.00015977 |
| SM d18:1-20:5  | Positive | 749.6 | 5.92 ± 0.01 | 0.14 ± 0.02                    | 0.11 ± 0.01 **                 | 0.00975825 | 0.13 ± 0.02                    | 0.13 ± 0.01                       | 0.94669517 |
| SM d18:1-22:0  | Positive | 787.7 | 5.74 ± 0.01 | 7.2 ± 0.4                      | 6.6 ± 0.5                      | 0.05859460 | 6.4 ± 0.7                      | 8.2 ± 0.6 **                      | 0.00107512 |
| SM d18:1-22:1  | Positive | 785.7 | 5.77 ± 0.01 | 4.8 ± 0.2                      | 4.7 ± 0.4                      | 0.70009811 | 4.4 ± 0.6                      | 5.4 ± 0.1 **                      | 0.00285852 |
| SM d18:1-22:2  | Positive | 783.6 | 5.81 ± 0.01 | 0.83 ± 0.08                    | 0.87 ± 0.07                    | 0.40769600 | 0.76 ± 0.06                    | 0.80 ± 0.05                       | 0.23881982 |
| SM d18:1-22:3  | Positive | 781.6 | 5.84 ± 0.01 | 0.18 ± 0.01                    | 0.16 ± 0.01                    | 0.13136862 | 0.15 ± 0.03                    | 0.19 ± 0.01 **                    | 0.00776457 |
| SM total       |          |       |             | 103 ± 7                        | 105 ± 4                        | 0.55430453 | 95.5 ± 8.3                     | 113 ± 7 **                        | 0.00262727 |
| Cer d18:1-16:0 | Positive | 538.5 | 4.48 ± 0.01 | 3.9 ± 1.0                      | 4.1 ± 0.7                      | 0.71621552 | 4.6 ± 0.7                      | 4.1 ± 0.8                         | 0.35565524 |
| Cer d18:1-16:1 | Positive | 536.5 | 4.48 ± 0.01 | 1.1 ± 0.1                      | 0.96 ± 0.05                    | 0.07948242 | 1.1 ± 0.1                      | 1.1 ± 0.1                         | 0.72846614 |
| Cer d18:1-18:0 | Positive | 566.6 | 4.48 ± 0.01 | 3.4 ± 1.1                      | 4.2 ± 1.2                      | 0.24417604 | 3.5 ± 0.7                      | 3.4 ± 0.9                         | 0.77891585 |
| Cer d18:1-18:1 | Positive | 564.5 | 4.49 ± 0.01 | (2.7 ± 1.4) × 10 <sup>-2</sup> | (4.3 ± 2.3) × 10 <sup>-2</sup> | 0.17654222 | (2.5 ± 0.7) × 10 <sup>-2</sup> | (2.5 ± 1.1) × 10 <sup>-2</sup>    | 0.93010042 |
| Cer d18:1-18:2 | Positive | 562.5 | 4.48 ± 0.01 | 0.65 ± 0.18                    | 0.62 ± 0.10                    | 0.76428123 | 0.70 ± 0.08                    | 0.62 ± 0.09                       | 0.15508199 |
| Cer d18:1-18:4 | Positive | 558.5 | 4.49 ± 0.01 | (5.6 ± 2.4) × 10 <sup>-2</sup> | (4.5 ± 1.2) × 10 <sup>-2</sup> | 0.31610197 | (4.9 ± 2.0) × 10 <sup>-2</sup> | (4.8 ± 1.6) × 10 <sup>-2</sup>    | 0.93347253 |

|                |          |       |             |                                |                                |            |                                |                                  |            |
|----------------|----------|-------|-------------|--------------------------------|--------------------------------|------------|--------------------------------|----------------------------------|------------|
| Cer d18:1-20:0 | Positive | 594.6 | 4.49 ± 0.01 | 3.4 ± 0.8                      | 4.1 ± 1.2                      | 0.28732697 | 4.0 ± 0.6                      | 4.1 ± 0.6                        | 0.82780066 |
| Cer d18:1-20:1 | Positive | 592.6 | 4.49 ± 0.01 | (4.4 ± 1.4) × 10 <sup>-2</sup> | (5.2 ± 1.6) × 10 <sup>-2</sup> | 0.37094215 | (4.5 ± 2.0) × 10 <sup>-2</sup> | (7.7 ± 2.2) × 10 <sup>-2</sup> * | 0.02436778 |
| Cer d18:1-20:2 | Positive | 590.6 | 4.49 ± 0.01 | 1.3 ± 0.3                      | 1.3 ± 0.2                      | 0.96100796 | 1.6 ± 0.2                      | 1.5 ± 0.2                        | 0.52084745 |
| Cer d18:1-20:4 | Positive | 586.5 | 4.49 ± 0.01 | 0.17 ± 0.04                    | 0.19 ± 0.06                    | 0.41760884 | 0.20 ± 0.05                    | 0.19 ± 0.04                      | 0.74765773 |
| Cer d18:1-22:0 | Positive | 622.6 | 4.49 ± 0.01 | 16.0 ± 4.1                     | 19.5 ± 4.6                     | 0.20151153 | 18.0 ± 2.3                     | 18.4 ± 3.1                       | 0.78878230 |
| Cer d18:1-22:1 | Positive | 620.6 | 4.49 ± 0.01 | 0.77 ± 0.19                    | 0.75 ± 0.17                    | 0.84585287 | 0.83 ± 0.09                    | 0.81 ± 0.17                      | 0.81526479 |
| Cer d18:1-22:2 | Positive | 618.6 | 4.49 ± 0.01 | 17.3 ± 3.7                     | 17.3 ± 3.0                     | 0.99849283 | 20.6 ± 2.7                     | 19.1 ± 2.6                       | 0.34112238 |
| Cer d18:1-22:3 | Positive | 616.6 | 4.51 ± 0.01 | 0.16 ± 0.04                    | 0.19 ± 0.04                    | 0.25992105 | 0.15 ± 0.05                    | 0.19 ± 0.05                      | 0.14657820 |
| Cer d18:1-22:4 | Positive | 614.6 | 4.49 ± 0.01 | 0.20 ± 0.03                    | 0.20 ± 0.02                    | 0.89009714 | 0.22 ± 0.06                    | 0.20 ± 0.03                      | 0.43188454 |
| Cer d18:1-22:5 | Positive | 612.5 | 4.51 ± 0.01 | (7.0 ± 3.1) × 10 <sup>-2</sup> | (9.7 ± 3.1) × 10 <sup>-2</sup> | 0.16594838 | (8.6 ± 3.1) × 10 <sup>-2</sup> | (7.0 ± 1.8) × 10 <sup>-2</sup>   | 0.30618184 |
| Cer total      |          |       |             | 48.6 ± 11.1                    | 53.7 ± 10.6                    | 0.43730987 | 55.6 ± 6.4                     | 53.9 ± 7.6                       | 0.68453246 |
| CE 16:0        | Positive | 642.6 | 1.12 ± 0.03 | 4962 ± 1780                    | 4018 ± 889                     | 0.27230393 | 2918 ± 477                     | 3983 ± 896 *                     | 0.02797415 |
| CE 16:1        | Positive | 640.6 | 1.14 ± 0.03 | 3401 ± 1347                    | 5105 ± 1347                    | 0.05325902 | 4469 ± 946                     | 3470 ± 520 *                     | 0.04685439 |
| CE 18:0        | Positive | 670.6 | 1.15 ± 0.03 | 750 ± 321                      | 1796 ± 608 **                  | 0.00393517 | 932 ± 230                      | 734 ± 344                        | 0.26822021 |
| CE 18:1        | Positive | 668.6 | 1.16 ± 0.03 | 8480 ± 3084                    | 14896 ± 7618                   | 0.08490389 | 12525 ± 7407                   | 12700 ± 3337                     | 0.95886372 |
| CE 18:2        | Positive | 666.6 | 1.22 ± 0.02 | 144420 ± 42213                 | 88095 ± 32425 *                | 0.02685993 | 141666 ± 46886                 | 147395 ± 68857                   | 0.86957658 |
| CE 18:3        | Positive | 664.6 | 1.23 ± 0.02 | 76925 ± 29235                  | 57531 ± 21453                  | 0.21948448 | 66024 ± 19954                  | 50780 ± 27404                    | 0.29647685 |
| CE 18:4        | Positive | 662.6 | 1.24 ± 0.03 | 605 ± 217                      | 451 ± 217                      | 0.24690662 | 407 ± 145                      | 728 ± 456                        | 0.13145019 |
| CE 20:0        | Positive | 698.7 | 1.21 ± 0.07 | 20.5 ± 21.4                    | 12.0 ± 11.3                    | 0.40798744 | n.d.                           | 4.6 ± 3.3                        |            |
| CE 20:1        | Positive | 696.7 | 1.23 ± 0.03 | 57.6 ± 24.6                    | 31.6 ± 15.0                    | 0.05209412 | 37.2 ± 18.1                    | 25.4 ± 7.0                       | 0.16678409 |
| CE 20:2        | Positive | 694.6 | 1.24 ± 0.02 | 473 ± 168                      | 372 ± 155                      | 0.30582783 | 301 ± 115                      | 218 ± 75                         | 0.16734244 |
| CE 20:3        | Positive | 692.6 | 1.24 ± 0.02 | 4071 ± 1600                    | 3634 ± 1697                    | 0.65549931 | 2624 ± 1181                    | 2547 ± 1199                      | 0.91216733 |

|               |          |       |             |                                |                                |            |                                |                                   |            |
|---------------|----------|-------|-------------|--------------------------------|--------------------------------|------------|--------------------------------|-----------------------------------|------------|
| CE 20:4       | Positive | 690.6 | 1.24 ± 0.03 | 58081 ± 23440                  | 45887 ± 18565                  | 0.34140786 | 38878 ± 25507                  | 42460 ± 19887.86                  | 0.79167655 |
| CE 20:5       | Positive | 688.6 | 1.25 ± 0.03 | 5520 ± 2637                    | 5096 ± 2239                    | 0.77030501 | 2890 ± 1470                    | 179812 ± 96689**                  | 0.00117616 |
| CE 22:0       | Positive | 726.7 | 1.25 ± 0.03 | 33.0 ± 19.9                    | 28.2 ± 17.8                    | 0.66829809 | 20.8 ± 14.7                    | 11.3 ± 5.7                        | 0.16706474 |
| CE 22:1       | Positive | 724.7 | 1.24 ± 0.03 | 25.8 ± 12.9                    | 18.3 ± 10.0                    | 0.28264121 | 15.9 ± 7.9                     | 10.2 ± 4.6                        | 0.16135876 |
| CE 22:2       | Positive | 722.7 | 1.24 ± 0.02 | 51.3 ± 28.0                    | 31.5 ± 13.1                    | 0.14959675 | 27.5 ± 15.6                    | 13.5 ± 6.7                        | 0.07268283 |
| CE 22:3       | Positive | 720.7 | 1.24 ± 0.03 | 81.7 ± 33.9                    | 61.7 ± 26.2                    | 0.28063154 | 44.3 ± 33.9                    | 20.5 ± 8.3                        | 0.12534406 |
| CE 22:4       | Positive | 718.6 | 1.26 ± 0.03 | 669 ± 274                      | 511 ± 227                      | 0.30168430 | 341 ± 268                      | 245 ± 126                         | 0.44319203 |
| CE 22:5       | Positive | 716.6 | 1.27 ± 0.04 | 1359 ± 649                     | 1158 ± 538                     | 0.57246231 | 728 ± 536                      | 3283 ± 1854*                      | 0.00883452 |
| CE 22:6       | Positive | 714.6 | 1.30 ± 0.04 | 1495 ± 743                     | 1375 ± 607                     | 0.76654771 | 806 ± 578                      | 1353 ± 700                        | 0.17066330 |
| CE total      |          |       |             | 311478 ± 103097                | 230108 ± 78259                 | 0.15460699 | 275654 ± 82839                 | 449791 ± 205639                   | 0.08325502 |
| MAG 14:0      | Positive | 303.3 | 4.02 ± 0.03 | 2.3 ± 1.0                      | 1.8 ± 0.6                      | 0.29348623 | 2.8 ± 0.8                      | 1.4 ± 0.4**                       | 0.00183486 |
| MAG 16:0      | Positive | 331.3 | 4.04 ± 0.02 | 57.2 ± 17.2                    | 45.8 ± 10.9                    | 0.19822634 | 63.5 ± 17.5                    | 45.7 ± 6.6                        | 0.04178279 |
| MAG 16:1      | Positive | 329.3 | 4.09 ± 0.02 | 1.0 ± 0.5                      | 0.58 ± 0.31                    | 0.09833084 | 1.4 ± 0.6                      | 0.54 ± 0.30*                      | 0.01445036 |
| MAG 18:0      | Positive | 359.3 | 4.06 ± 0.02 | 29.0 ± 2.8                     | 34.1 ± 12.5                    | 0.34783936 | 37.0 ± 10.7                    | 41.2 ± 26.2                       | 0.72505312 |
| MAG 18:1      | Positive | 357.3 | 4.10 ± 0.02 | 15.0 ± 6.3                     | 11.1 ± 3.8                     | 0.22405664 | 16.9 ± 5.5                     | 6.9 ± 1.8**                       | 0.00169292 |
| MAG 18:2      | Positive | 355.3 | 4.15 ± 0.02 | 5.4 ± 2.2                      | 2.9 ± 0.8*                     | 0.02636887 | 6.9 ± 2.4                      | 3.1 ± 0.9**                       | 0.00417467 |
| MAG total     |          |       |             | 110 ± 29                       | 96.2 ± 23.0                    | 0.39130388 | 128 ± 31                       | 98.8 ± 24.9                       | 0.09781030 |
| DAG 14:0-16:0 | Positive | 558.5 | 3.14 ± 0.01 | 0.14 ± 0.05                    | 0.18 ± 0.06                    | 0.20702950 | 0.13 ± 0.03                    | (6.6 ± 3.5) × 10 <sup>-2</sup> *  | 0.01212783 |
| DAG 14:0-16:1 | Positive | 556.5 | 3.16 ± 0.02 | (3.1 ± 1.1) × 10 <sup>-2</sup> | (3.5 ± 1.9) × 10 <sup>-2</sup> | 0.68951346 | (2.5 ± 1.4) × 10 <sup>-2</sup> | (1.5 ± 1.2) × 10 <sup>-2</sup>    | 0.20772814 |
| DAG 14:0-18:1 | Positive | 584.5 | 3.17 ± 0.01 | 0.25 ± 0.08                    | 0.34 ± 0.13                    | 0.19154994 | 0.30 ± 0.16                    | 0.10 ± 0.05*                      | 0.01397408 |
| DAG 14:0-18:2 | Positive | 582.5 | 3.19 ± 0.01 | 0.26 ± 0.11                    | 0.31 ± 0.12                    | 0.51715991 | 0.34 ± 0.15                    | 0.12 ± 0.07*                      | 0.01061967 |
| DAG 14:0-18:3 | Positive | 580.5 | 3.23 ± 0.01 | (3.7 ± 1.7) × 10 <sup>-2</sup> | (3.1 ± 1.6) × 10 <sup>-2</sup> | 0.57950489 | (4.8 ± 1.9) × 10 <sup>-2</sup> | (1.4 ± 1.4) × 10 <sup>-2</sup> ** | 0.00501591 |

|               |          |       |             |                                |                                |            |                                |                                   |            |
|---------------|----------|-------|-------------|--------------------------------|--------------------------------|------------|--------------------------------|-----------------------------------|------------|
| DAG 14:0-20:5 | Positive | 604.5 | 3.26 ± 0.01 | n.d.                           | n.d.                           |            | n.d.                           | (2.9 ± 0.9) × 10 <sup>-2</sup>    |            |
| DAG 14:0-22:5 | Positive | 632.5 | 3.28 ± 0.02 | (2.4 ± 3.1) × 10 <sup>-3</sup> | (1.6 ± 0.7) × 10 <sup>-3</sup> | 0.64488739 | (1.8 ± 1.8) × 10 <sup>-3</sup> | (4.3 ± 1.1) × 10 <sup>-2***</sup> | 0.00051769 |
| DAG 14:1-18:2 | Positive | 580.5 | 3.22 ± 0.01 | (2.0 ± 0.7) × 10 <sup>-2</sup> | (1.8 ± 1.2) × 10 <sup>-2</sup> | 0.77552917 | (2.6 ± 1.5) × 10 <sup>-2</sup> | (1.3 ± 1.2) × 10 <sup>-2</sup>    | 0.13916559 |
| DAG 14:1-22:2 | Positive | 636.6 | 3.25 ± 0.02 | (1.3 ± 0.6) × 10 <sup>-2</sup> | (8.9 ± 5.1) × 10 <sup>-3</sup> | 0.18815580 | (1.6 ± 0.6) × 10 <sup>-2</sup> | (3.8 ± 2.1) × 10 <sup>-3**</sup>  | 0.00106726 |
| DAG 16:0-16:0 | Positive | 586.5 | 3.16 ± 0.01 | 0.86 ± 0.24                    | 0.87 ± 0.28                    | 0.92221028 | 0.72 ± 0.14                    | 0.34 ± 0.11***                    | 0.00031598 |
| DAG 16:0-16:1 | Positive | 584.5 | 3.18 ± 0.01 | 0.49 ± 0.13                    | 0.45 ± 0.23                    | 0.71447544 | 0.53 ± 0.18                    | 0.22 ± 0.14**                     | 0.00743974 |
| DAG 16:0-18:0 | Positive | 614.6 | 3.18 ± 0.01 | 0.44 ± 0.10                    | 0.45 ± 0.12                    | 0.90194702 | 0.36 ± 0.09                    | 0.13 ± 0.05***                    | 0.00027325 |
| DAG 16:0-18:1 | Positive | 612.6 | 3.20 ± 0.01 | 3.1 ± 0.7                      | 3.0 ± 1.0                      | 0.89798438 | 2.7 ± 1.0                      | 1.2 ± 0.5**                       | 0.00533238 |
| DAG 16:0-18:2 | Positive | 610.5 | 3.22 ± 0.01 | 4.0 ± 0.9                      | 3.7 ± 1.3                      | 0.67382038 | 3.9 ± 1.0                      | 1.7 ± 0.7**                       | 0.00149741 |
| DAG 16:0-18:3 | Positive | 608.5 | 3.24 ± 0.01 | 0.62 ± 0.20                    | 0.56 ± 0.19                    | 0.56068908 | 0.66 ± 0.14                    | 0.27 ± 0.13***                    | 0.00050278 |
| DAG 16:0-20:2 | Positive | 638.6 | 3.24 ± 0.02 | (2.2 ± 1.4) × 10 <sup>-2</sup> | (2.1 ± 1.8) × 10 <sup>-2</sup> | 0.87148124 | (1.9 ± 2.3) × 10 <sup>-2</sup> | (7.5 ± 5.4) × 10 <sup>-3</sup>    | 0.24075785 |
| DAG 16:0-20:3 | Positive | 636.6 | 3.25 ± 0.01 | (3.3 ± 1.4) × 10 <sup>-2</sup> | (2.8 ± 1.4) × 10 <sup>-2</sup> | 0.52435497 | (2.6 ± 1.2) × 10 <sup>-2</sup> | (2.0 ± 0.8) × 10 <sup>-2</sup>    | 0.37191297 |
| DAG 16:0-20:4 | Positive | 634.5 | 3.25 ± 0.02 | (4.2 ± 1.1) × 10 <sup>-2</sup> | (3.7 ± 0.9) × 10 <sup>-2</sup> | 0.45048744 | (4.9 ± 2.6) × 10 <sup>-2</sup> | (6.6 ± 1.9) × 10 <sup>-2</sup>    | 0.24466220 |
| DAG 16:0-20:5 | Positive | 632.5 | 3.28 ± 0.01 | (3.7 ± 3.6) × 10 <sup>-3</sup> | (3.0 ± 3.2) × 10 <sup>-3</sup> | 0.70955164 | (4.1 ± 2.0) × 10 <sup>-3</sup> | 0.39 ± 0.12***                    | 0.00005910 |
| DAG 16:1-16:1 | Positive | 582.5 | 3.19 ± 0.01 | (4.7 ± 1.2) × 10 <sup>-2</sup> | (5.3 ± 2.6) × 10 <sup>-2</sup> | 0.63098731 | (5.2 ± 1.0) × 10 <sup>-2</sup> | (2.6 ± 1.6) × 10 <sup>-2**</sup>  | 0.00627238 |
| DAG 16:1-18:0 | Positive | 612.6 | 3.20 ± 0.01 | (7.3 ± 2.0) × 10 <sup>-2</sup> | (6.6 ± 2.7) × 10 <sup>-2</sup> | 0.62095644 | (6.8 ± 3.0) × 10 <sup>-2</sup> | (2.5 ± 1.5) × 10 <sup>-2**</sup>  | 0.00971542 |
| DAG 16:1-18:1 | Positive | 610.5 | 3.21 ± 0.01 | 0.66 ± 0.21                    | 0.75 ± 0.37                    | 0.59377620 | 0.79 ± 0.23                    | 0.34 ± 0.17**                     | 0.00352561 |
| DAG 16:1-18:2 | Positive | 608.5 | 3.24 ± 0.01 | 0.82 ± 0.22                    | 0.75 ± 0.31                    | 0.67275486 | 0.96 ± 0.25                    | 0.57 ± 0.28*                      | 0.03015742 |
| DAG 16:1-18:3 | Positive | 606.5 | 3.26 ± 0.01 | 0.12 ± 0.04                    | (8.7 ± 5.3) × 10 <sup>-2</sup> | 0.24187825 | 0.17 ± 0.07                    | (7.7 ± 5.7) × 10 <sup>-2*</sup>   | 0.02748192 |
| DAG 16:1-20:2 | Positive | 636.6 | 3.25 ± 0.02 | (2.1 ± 0.8) × 10 <sup>-2</sup> | (1.5 ± 0.5) × 10 <sup>-2</sup> | 0.14049913 | (2.5 ± 1.5) × 10 <sup>-2</sup> | (6.0 ± 3.4) × 10 <sup>-3*</sup>   | 0.01414243 |
| DAG 16:1-20:3 | Positive | 634.5 | 3.27 ± 0.01 | (2.0 ± 1.0) × 10 <sup>-2</sup> | (1.5 ± 0.6) × 10 <sup>-2</sup> | 0.28448612 | (2.1 ± 1.1) × 10 <sup>-2</sup> | (1.0 ± 0.5) × 10 <sup>-2</sup>    | 0.05034798 |
| DAG 16:1-20:4 | Positive | 632.5 | 3.27 ± 0.02 | (1.2 ± 0.5) × 10 <sup>-2</sup> | (1.0 ± 0.5) × 10 <sup>-2</sup> | 0.41976876 | (1.6 ± 1.0) × 10 <sup>-2</sup> | (2.2 ± 1.0) × 10 <sup>-2</sup>    | 0.38317153 |

|               |          |       |             |                                |                                  |            |                                |                                   |            |
|---------------|----------|-------|-------------|--------------------------------|----------------------------------|------------|--------------------------------|-----------------------------------|------------|
| DAG 16:1-20:5 | Positive | 630.5 | 3.29 ± 0.02 | n.d.                           | n.d.                             |            | n.d.                           | (8.1 ± 2.4) × 10 <sup>-2</sup>    |            |
| DAG 18:0-18:0 | Positive | 642.6 | 3.21 ± 0.01 | (6.1 ± 2.5) × 10 <sup>-2</sup> | (6.4 ± 2.6) × 10 <sup>-2</sup>   | 0.86235379 | (5.0 ± 2.2) × 10 <sup>-2</sup> | (2.3 ± 1.6) × 10 <sup>-2</sup> *  | 0.03075030 |
| DAG 18:0-18:1 | Positive | 640.6 | 3.22 ± 0.01 | 0.63 ± 0.13                    | 0.66 ± 0.21                      | 0.80028306 | 0.58 ± 0.18                    | 0.17 ± 0.09***                    | 0.00051060 |
| DAG 18:0-18:2 | Positive | 638.6 | 3.24 ± 0.01 | 1.3 ± 0.3                      | 1.1 ± 0.2                        | 0.16705264 | 1.3 ± 0.3                      | 0.39 ± 0.17***                    | 0.00014791 |
| DAG 18:0-18:3 | Positive | 636.6 | 3.26 ± 0.02 | 0.15 ± 0.04                    | 0.12 ± 0.05                      | 0.19755193 | 0.16 ± 0.06                    | (5.2 ± 3.3) × 10 <sup>-2</sup> ** | 0.00181955 |
| DAG 18:0-18:4 | Positive | 634.5 | 3.26 ± 0.01 | (4.1 ± 2.6) × 10 <sup>-3</sup> | (2.4 ± 1.4) × 10 <sup>-3</sup>   | 0.27827884 | (3.4 ± 2.8) × 10 <sup>-3</sup> | (1.6 ± 1.4) × 10 <sup>-3</sup>    | 0.27314492 |
| DAG 18:0-20:4 | Positive | 662.6 | 3.28 ± 0.02 | (2.3 ± 0.4) × 10 <sup>-2</sup> | (1.6 ± 0.5) × 10 <sup>-2</sup> * | 0.01835844 | (1.9 ± 0.5) × 10 <sup>-2</sup> | (1.2 ± 0.7) × 10 <sup>-2</sup> *  | 0.10224676 |
| DAG 18:0-20:5 | Positive | 660.6 | 3.31 ± 0.02 | n.d.                           | n.d.                             |            | n.d.                           | (3.7 ± 1.5) × 10 <sup>-2</sup>    |            |
| DAG 18:1-18:1 | Positive | 638.6 | 3.23 ± 0.01 | 2.7 ± 0.7                      | 2.8 ± 0.9                        | 0.81719753 | 2.8 ± 0.8                      | 1.1 ± 0.5***                      | 0.00082304 |
| DAG 18:1-18:2 | Positive | 636.6 | 3.25 ± 0.02 | 6.7 ± 1.6                      | 6.1 ± 1.8                        | 0.55614795 | 7.9 ± 2.5                      | 3.5 ± 1.4**                       | 0.00401720 |
| DAG 18:1-18:3 | Positive | 634.5 | 3.27 ± 0.02 | 1.0 ± 0.3                      | 0.82 ± 0.24                      | 0.26410352 | 1.4 ± 0.4                      | 0.54 ± 0.21**                     | 0.00107849 |
| DAG 18:1-18:4 | Positive | 632.5 | 3.30 ± 0.02 | (2.0 ± 1.0) × 10 <sup>-2</sup> | (1.3 ± 0.8) × 10 <sup>-2</sup>   | 0.24377871 | (2.6 ± 1.8) × 10 <sup>-2</sup> | (1.6 ± 0.3) × 10 <sup>-2</sup>    | 0.28427552 |
| DAG 18:1-20:1 | Positive | 666.6 | 3.24 ± 0.03 | (3.1 ± 0.9) × 10 <sup>-2</sup> | (4.1 ± 2.0) × 10 <sup>-2</sup>   | 0.26860246 | (3.3 ± 2.1) × 10 <sup>-2</sup> | (2.5 ± 1.3) × 10 <sup>-3</sup> *  | 0.00519172 |
| DAG 18:1-20:2 | Positive | 664.6 | 3.27 ± 0.02 | (3.2 ± 1.2) × 10 <sup>-2</sup> | (3.0 ± 1.4) × 10 <sup>-2</sup>   | 0.78038666 | (3.6 ± 1.7) × 10 <sup>-2</sup> | (9.2 ± 6.3) × 10 <sup>-3</sup> ** | 0.00997239 |
| DAG 18:1-20:4 | Positive | 660.6 | 3.29 ± 0.02 | (9.4 ± 1.8) × 10 <sup>-2</sup> | (8.3 ± 3.1) × 10 <sup>-2</sup>   | 0.46832426 | 0.12 ± 0.05                    | 0.10 ± 0.03                       | 0.35562919 |
| DAG 18:1-20:5 | Positive | 658.5 | 3.32 ± 0.02 | (5.0 ± 4.4) × 10 <sup>-3</sup> | (2.3 ± 2.5) × 10 <sup>-3</sup>   | 0.22369677 | (8.3 ± 5.6) × 10 <sup>-3</sup> | 0.48 ± 0.15***                    | 0.00001397 |
| DAG 18:1-22:4 | Positive | 688.6 | 3.31 ± 0.02 | (7.2 ± 3.6) × 10 <sup>-3</sup> | (4.4 ± 2.8) × 10 <sup>-3</sup>   | 0.17505181 | (7.6 ± 4.9) × 10 <sup>-3</sup> | (2.9 ± 4.4) × 10 <sup>-3</sup>    | 0.17421491 |
| DAG 18:1-22:5 | Positive | 686.6 | 3.34 ± 0.03 | (7.5 ± 4.1) × 10 <sup>-3</sup> | (5.5 ± 3.6) × 10 <sup>-3</sup>   | 0.38385246 | (9.4 ± 7.5) × 10 <sup>-3</sup> | (7.0 ± 4.0) × 10 <sup>-2</sup> *  | 0.00467176 |
| DAG 18:2-18:2 | Positive | 634.5 | 3.27 ± 0.02 | 2.7 ± 0.8                      | 1.9 ± 0.7                        | 0.11494759 | 3.3 ± 0.7                      | 1.5 ± 0.6***                      | 0.00050715 |
| DAG 18:2-18:3 | Positive | 632.5 | 3.30 ± 0.02 | 0.53 ± 0.19                    | 0.41 ± 0.16                      | 0.23423457 | 0.74 ± 0.28                    | 0.26 ± 0.11**                     | 0.00275656 |
| DAG 18:2-20:4 | Positive | 658.5 | 3.32 ± 0.02 | (5.6 ± 1.2) × 10 <sup>-2</sup> | (4.1 ± 1.2) × 10 <sup>-2</sup>   | 0.05039565 | (7.3 ± 4.1) × 10 <sup>-2</sup> | 0.10 ± 0.03                       | 0.17654246 |
| DAG 18:2-20:5 | Positive | 656.5 | 3.35 ± 0.02 | (3.5 ± 2.1) × 10 <sup>-3</sup> | (1.3 ± 1.1) × 10 <sup>-3</sup> * | 0.04155523 | (2.6 ± 1.5) × 10 <sup>-3</sup> | 0.60 ± 0.14***                    | 0.00000072 |



|               |          |       |             |                                |                                |            |                                |                                  |            |
|---------------|----------|-------|-------------|--------------------------------|--------------------------------|------------|--------------------------------|----------------------------------|------------|
| DAG 18:2-22:4 | Positive | 686.6 | 3.34 ± 0.03 | (2.3 ± 1.8) × 10 <sup>-3</sup> | (2.6 ± 1.5) × 10 <sup>-3</sup> | 0.77147079 | (4.8 ± 3.1) × 10 <sup>-3</sup> | (1.4 ± 1.7) × 10 <sup>-3</sup>   | 0.06810799 |
| DAG 18:2-22:5 | Positive | 684.6 | 3.36 ± 0.03 | (5.0 ± 3.0) × 10 <sup>-3</sup> | (3.8 ± 2.0) × 10 <sup>-3</sup> | 0.48927801 | (6.2 ± 6.1) × 10 <sup>-3</sup> | (5.3 ± 2.9) × 10 <sup>-2</sup> * | 0.00706365 |
| DAG 18:3-20:4 | Positive | 656.5 | 3.35 ± 0.02 | (2.0 ± 2.0) × 10 <sup>-3</sup> | (2.6 ± 3.5) × 10 <sup>-3</sup> | 0.78318074 | (3.7 ± 2.7) × 10 <sup>-3</sup> | (5.8 ± 2.5) × 10 <sup>-3</sup>   | 0.22489440 |
| DAG 18:3-20:5 | Positive | 654.5 | 3.40 ± 0.01 | n.d.                           | n.d.                           |            | n.d.                           | (4.1 ± 2.0) × 10 <sup>-2</sup>   |            |
| DAG total     |          |       |             | 28.1 ± 6.8                     | 26.0 ± 8.1                     | 0.63055436 | 30.4 ± 8.1                     | 14.8 ± 5.5**                     | 0.00290913 |
| TAG 40:0      | Positive | 712.6 | 1.19 ± 0.04 | 51.6 ± 12.8                    | 44.7 ± 7.2                     | 0.27245601 | 69.9 ± 14.8                    | 94.7 ± 28.7                      | 0.08910160 |
| TAG 40:1      | Positive | 710.6 | 1.09 ± 0.13 | 45.0 ± 13.2                    | 39.4 ± 7.8                     | 0.39112738 | 59.6 ± 10.8                    | 211 ± 71**                       | 0.00040821 |
| TAG 40:2      | Positive | 708.6 | 1.06 ± 0.02 | 168 ± 55                       | 162 ± 26                       | 0.80157852 | 275 ± 96                       | 254 ± 38                         | 0.62491177 |
| TAG 42:0      | Positive | 740.7 | 1.02 ± 0.04 | 34.5 ± 11.0                    | 35.2 ± 8.0                     | 0.90042043 | 36.6 ± 8.7                     | 27.4 ± 4.1*                      | 0.04082777 |
| TAG 42:1      | Positive | 738.7 | 1.01 ± 0.04 | 106 ± 18                       | 95.8 ± 8.9                     | 0.23307827 | 111 ± 10                       | 83.0 ± 8.0***                    | 0.00036976 |
| TAG 42:2      | Positive | 736.6 | 1.12 ± 0.03 | 215 ± 75                       | 216 ± 46                       | 0.98289714 | 361 ± 131                      | 324 ± 55                         | 0.52957929 |
| TAG 42:3      | Positive | 734.6 | 0.97 ± 0.02 | 31.4 ± 3.9                     | 32.9 ± 10.5                    | 0.75044870 | 41.4 ± 4.7                     | 38.4 ± 3.0                       | 0.21058542 |
| TAG 42:4      | Positive | 732.6 | 0.99 ± 0.02 | 118 ± 26                       | 103 ± 24                       | 0.34066073 | 150 ± 26                       | 117 ± 11*                        | 0.01655077 |
| TAG 44:0      | Positive | 768.7 | 1.07 ± 0.05 | 116 ± 55                       | 188 ± 65                       | 0.06377608 | 169 ± 72                       | 89.8 ± 31.1*                     | 0.03295966 |
| TAG 44:1      | Positive | 766.7 | 1.10 ± 0.04 | 74.3 ± 36.2                    | 103 ± 41                       | 0.21965904 | 121 ± 46                       | 66.4 ± 23.3*                     | 0.02601978 |
| TAG 44:2      | Positive | 764.7 | 1.17 ± 0.04 | 137 ± 47                       | 146 ± 28                       | 0.69592282 | 216 ± 75                       | 174 ± 23                         | 0.22732924 |
| TAG 44:3      | Positive | 762.7 | 1.01 ± 0.02 | 39.0 ± 9.0                     | 33.6 ± 6.5                     | 0.26798354 | 52.6 ± 5.6                     | 41.5 ± 3.9**                     | 0.00260638 |
| TAG 44:4      | Positive | 760.6 | 1.02 ± 0.02 | 467 ± 70                       | 411 ± 67                       | 0.18931512 | 607 ± 81                       | 487 ± 81*                        | 0.02833085 |
| TAG 44:5      | Positive | 758.6 | 1.08 ± 0.04 | 2594 ± 520                     | 2198 ± 332                     | 0.14753318 | 3595 ± 626                     | 3100 ± 632                       | 0.20335209 |
| TAG 46:0      | Positive | 796.7 | 1.11 ± 0.03 | 624 ± 329                      | 1177 ± 412*                    | 0.02789043 | 849 ± 419                      | 379 ± 217*                       | 0.03473659 |
| TAG 46:1      | Positive | 794.7 | 1.15 ± 0.05 | 603 ± 303                      | 1001 ± 426                     | 0.09214586 | 960 ± 444                      | 425 ± 246*                       | 0.02721232 |
| TAG 46:2      | Positive | 792.7 | 1.20 ± 0.04 | 361 ± 168                      | 484 ± 176                      | 0.24281001 | 583 ± 202                      | 357 ± 106*                       | 0.03632193 |

|          |          |       |             |              |                |            |              |                |            |
|----------|----------|-------|-------------|--------------|----------------|------------|--------------|----------------|------------|
| TAG 46:3 | Positive | 790.7 | 1.22 ± 0.03 | 76.5 ± 36.5  | 104 ± 42       | 0.26064935 | 131 ± 59     | 69.6 ± 36.9    | 0.05702088 |
| TAG 46:4 | Positive | 788.7 | 1.23 ± 0.03 | 22.5 ± 8.7   | 23.5 ± 9.1     | 0.84878670 | 31.1 ± 10.6  | 23.8 ± 9.1     | 0.22728593 |
| TAG 46:5 | Positive | 786.7 | 1.17 ± 0.03 | 21.7 ± 6.3   | 19.3 ± 2.8     | 0.41203251 | 28.0 ± 4.4   | 23.4 ± 5.1     | 0.12169241 |
| TAG 46:6 | Positive | 784.6 | 1.19 ± 0.03 | 144 ± 24     | 135 ± 19       | 0.48745084 | 177 ± 21     | 137 ± 25 *     | 0.01229923 |
| TAG 48:0 | Positive | 824.8 | 1.18 ± 0.05 | 2192 ± 939   | 3533 ± 1078 *  | 0.04442981 | 2689 ± 965   | 1233 ± 690 *   | 0.01325689 |
| TAG 48:1 | Positive | 822.8 | 1.20 ± 0.03 | 4138 ± 1706  | 6288 ± 1933    | 0.06837398 | 5669 ± 2191  | 2411 ± 1401 *  | 0.01187460 |
| TAG 48:2 | Positive | 820.7 | 1.22 ± 0.03 | 3119 ± 1281  | 4119 ± 1323    | 0.21328643 | 4478 ± 1753  | 2058 ± 1114 *  | 0.01714136 |
| TAG 48:3 | Positive | 818.7 | 1.23 ± 0.03 | 932 ± 395    | 1175 ± 427     | 0.33090144 | 1461 ± 589   | 728 ± 432 *    | 0.03379169 |
| TAG 48:4 | Positive | 816.7 | 1.25 ± 0.03 | 219 ± 93     | 260 ± 105      | 0.49630047 | 365 ± 132    | 197 ± 113 *    | 0.04013274 |
| TAG 48:5 | Positive | 814.7 | 1.28 ± 0.04 | 55.8 ± 19.8  | 64.6 ± 20.8    | 0.47014797 | 82.9 ± 28.3  | 64.0 ± 27.2    | 0.26417671 |
| TAG 48:6 | Positive | 812.7 | 1.17 ± 0.04 | 87.8 ± 46.2  | 120 ± 34       | 0.20599444 | 106 ± 38     | 44.4 ± 16.4 ** | 0.00438595 |
| TAG 48:7 | Positive | 810.7 | 1.15 ± 0.05 | 463 ± 228    | 638 ± 220      | 0.20549543 | 585 ± 227    | 218 ± 85 **    | 0.00407282 |
| TAG 48:8 | Positive | 808.6 | 1.19 ± 0.09 | 409 ± 164    | 505 ± 155      | 0.32119178 | 511 ± 162    | 324 ± 63 *     | 0.02503009 |
| TAG 50:0 | Positive | 852.8 | 1.22 ± 0.03 | 2796 ± 938   | 3902 ± 840     | 0.05703776 | 3228 ± 982   | 1361 ± 570 **  | 0.00240699 |
| TAG 50:1 | Positive | 850.8 | 1.22 ± 0.03 | 11993 ± 3635 | 16824 ± 3496 * | 0.04089984 | 14523 ± 4724 | 6676 ± 3081 ** | 0.00667753 |
| TAG 50:2 | Positive | 848.8 | 1.24 ± 0.03 | 15469 ± 4569 | 17937 ± 4108   | 0.34842507 | 20387 ± 6247 | 10425 ± 5349 * | 0.01411310 |
| TAG 50:3 | Positive | 846.8 | 1.26 ± 0.03 | 6857 ± 2115  | 7755 ± 2209    | 0.48852259 | 10376 ± 3691 | 5513 ± 3207 *  | 0.03507881 |
| TAG 50:4 | Positive | 844.7 | 1.29 ± 0.04 | 2173 ± 737   | 2486 ± 795     | 0.49535073 | 3445 ± 1371  | 1779 ± 1040 *  | 0.03910477 |
| TAG 50:5 | Positive | 842.7 | 1.35 ± 0.09 | 533 ± 193    | 588 ± 189      | 0.63028039 | 864 ± 345    | 553 ± 265      | 0.11015620 |
| TAG 50:6 | Positive | 840.7 | 1.25 ± 0.11 | 210 ± 79     | 248 ± 65       | 0.38749588 | 284 ± 96     | 206 ± 80       | 0.15846787 |
| TAG 50:7 | Positive | 838.7 | 1.21 ± 0.03 | 688 ± 297    | 908 ± 256      | 0.19999501 | 792 ± 269    | 278 ± 95 **    | 0.00132625 |
| TAG 50:8 | Positive | 836.7 | 1.22 ± 0.03 | 1617 ± 587   | 1995 ± 497     | 0.25711466 | 1979 ± 664   | 730 ± 276 **   | 0.00167835 |

|           |          |       |             |              |              |            |               |                |            |
|-----------|----------|-------|-------------|--------------|--------------|------------|---------------|----------------|------------|
| TAG 50:9  | Positive | 834.7 | 1.22 ± 0.03 | 1750 ± 619   | 1800 ± 404   | 0.87317461 | 2209 ± 713    | 895 ± 353**    | 0.00234792 |
| TAG 52:0  | Positive | 880.8 | 1.22 ± 0.06 | 1856 ± 414   | 1694 ± 287   | 0.45106897 | 2045 ± 353    | 904 ± 212***   | 0.00004820 |
| TAG 52:1  | Positive | 878.8 | 1.26 ± 0.03 | 5251 ± 1168  | 6686 ± 1253  | 0.06722400 | 6549 ± 1935   | 2617 ± 1027**  | 0.00134348 |
| TAG 52:2  | Positive | 876.8 | 1.27 ± 0.03 | 17633 ± 3692 | 21365 ± 4258 | 0.13585276 | 23749 ± 7446  | 10592 ± 4386** | 0.00391422 |
| TAG 52:3  | Positive | 874.8 | 1.31 ± 0.08 | 25914 ± 5856 | 27323 ± 5818 | 0.68465582 | 36275 ± 11590 | 17911 ± 8159** | 0.00992771 |
| TAG 52:4  | Positive | 872.8 | 1.38 ± 0.11 | 18246 ± 4955 | 17793 ± 4048 | 0.86573012 | 26282 ± 9137  | 13337 ± 6589*  | 0.01832237 |
| TAG 52:5  | Positive | 870.8 | 1.49 ± 0.13 | 5678 ± 1690  | 5500 ± 1317  | 0.84275059 | 8737 ± 3267   | 4890 ± 2499*   | 0.04492959 |
| TAG 52:6  | Positive | 868.7 | 1.53 ± 0.15 | 1253 ± 307   | 1226 ± 245   | 0.87364824 | 1810 ± 600    | 1570 ± 646     | 0.52025167 |
| TAG 52:8  | Positive | 864.7 | 1.24 ± 0.03 | 1397 ± 380   | 1651 ± 304   | 0.23007336 | 1594 ± 450    | 661 ± 212**    | 0.00100095 |
| TAG 52:9  | Positive | 862.7 | 1.25 ± 0.03 | 2241 ± 656   | 2445 ± 473   | 0.54986044 | 2819 ± 901    | 1065 ± 384**   | 0.00136902 |
| TAG 52:10 | Positive | 860.7 | 1.28 ± 0.04 | 1844 ± 523   | 1839 ± 376   | 0.98707446 | 2487 ± 815    | 1018 ± 426**   | 0.00288529 |
| TAG 54:0  | Positive | 908.9 | 1.22 ± 0.10 | 567 ± 121    | 397 ± 77*    | 0.01567108 | 602 ± 73      | 305 ± 54***    | 0.00001149 |
| TAG 54:1  | Positive | 906.8 | 1.22 ± 0.03 | 1867 ± 328   | 1544 ± 251   | 0.08504040 | 2015 ± 316    | 672 ± 135***   | 0.00000238 |
| TAG 54:2  | Positive | 904.8 | 1.27 ± 0.08 | 4334 ± 763   | 4119 ± 677   | 0.61801355 | 5137 ± 1163   | 1624 ± 440***  | 0.00004091 |
| TAG 54:3  | Positive | 902.8 | 1.42 ± 0.13 | 7031 ± 1406  | 7583 ± 1426  | 0.51454007 | 9456 ± 2710   | 3159 ± 1187*** | 0.00039320 |
| TAG 54:4  | Positive | 900.8 | 1.51 ± 0.13 | 8168 ± 2082  | 8541 ± 1852  | 0.74970338 | 12015 ± 4041  | 4713 ± 2129**  | 0.00288940 |
| TAG 54:5  | Positive | 898.8 | 1.56 ± 0.11 | 6426 ± 1945  | 6191 ± 1408  | 0.81585427 | 9889 ± 3473   | 5577 ± 2669*   | 0.03657973 |
| TAG 54:6  | Positive | 896.8 | 1.62 ± 0.03 | 3682 ± 1335  | 3188 ± 744   | 0.44646718 | 5810 ± 2101   | 4589 ± 1761    | 0.30091075 |
| TAG 54:7  | Positive | 894.8 | 1.66 ± 0.04 | 1498 ± 523   | 1221 ± 261   | 0.27299647 | 2228 ± 717    | 3133 ± 894     | 0.08210057 |
| TAG 54:8  | Positive | 892.7 | 1.39 ± 0.22 | 775 ± 181    | 731 ± 118    | 0.63081156 | 994 ± 270     | 973 ± 248      | 0.89101680 |
| TAG 54:9  | Positive | 890.7 | 1.29 ± 0.04 | 1156 ± 179   | 1194 ± 164   | 0.70795365 | 1370 ± 333    | 508 ± 108***   | 0.00012762 |
| TAG 54:10 | Positive | 888.7 | 1.34 ± 0.09 | 1418 ± 241   | 1393 ± 205   | 0.84592540 | 1780 ± 466    | 691 ± 220***   | 0.00041071 |

|           |          |       |             |             |              |            |             |                |            |
|-----------|----------|-------|-------------|-------------|--------------|------------|-------------|----------------|------------|
| TAG 54:11 | Positive | 886.7 | 1.44 ± 0.13 | 1022 ± 214  | 947 ± 154    | 0.50266934 | 1341 ± 384  | 600 ± 203**    | 0.00188092 |
| TAG 54:12 | Positive | 884.7 | 1.53 ± 0.13 | 489 ± 104   | 449 ± 74     | 0.46696724 | 664 ± 196   | 471 ± 164      | 0.09476384 |
| TAG 56:1  | Positive | 934.9 | 1.24 ± 0.03 | 226 ± 41    | 160 ± 36*    | 0.01464455 | 254 ± 38    | 116 ± 22***    | 0.00001734 |
| TAG 56:2  | Positive | 932.9 | 1.25 ± 0.03 | 554 ± 112   | 366 ± 84**   | 0.00816609 | 628 ± 98    | 208 ± 41***    | 0.00000219 |
| TAG 56:3  | Positive | 930.8 | 1.28 ± 0.08 | 982 ± 218   | 640 ± 142**  | 0.00929751 | 1091 ± 189  | 429 ± 93***    | 0.00001658 |
| TAG 56:4  | Positive | 928.8 | 1.35 ± 0.13 | 1120 ± 243  | 758 ± 142*   | 0.01037069 | 1275 ± 226  | 517 ± 109***   | 0.00002323 |
| TAG 56:5  | Positive | 926.8 | 1.57 ± 0.13 | 851 ± 158   | 711 ± 113    | 0.10605482 | 1063 ± 244  | 1102 ± 346     | 0.82792026 |
| TAG 56:6  | Positive | 924.8 | 1.65 ± 0.04 | 674 ± 137   | 628 ± 97     | 0.51777724 | 935 ± 270   | 2671 ± 1184*   | 0.00570745 |
| TAG 56:7  | Positive | 922.8 | 1.68 ± 0.04 | 478 ± 98    | 467 ± 64     | 0.82560489 | 682 ± 174   | 3046 ± 1211**  | 0.00079891 |
| TAG 56:8  | Positive | 920.8 | 1.46 ± 0.27 | 419 ± 80    | 342 ± 49     | 0.07169493 | 541 ± 97    | 1848 ± 437***  | 0.00003083 |
| TAG 56:9  | Positive | 918.8 | 1.43 ± 0.33 | 433 ± 62    | 351 ± 64*    | 0.04904593 | 541 ± 91    | 1387 ± 217***  | 0.00000513 |
| TAG 56:10 | Positive | 916.7 | 1.51 ± 0.39 | 331 ± 50    | 286 ± 42     | 0.11680018 | 405 ± 88    | 1280 ± 155***  | 0.00000028 |
| TAG 56:11 | Positive | 914.7 | 1.49 ± 0.16 | 275 ± 46    | 246 ± 34     | 0.24838127 | 351 ± 82    | 167 ± 39***    | 0.00056849 |
| TAG 56:12 | Positive | 912.7 | 1.56 ± 0.12 | 201 ± 40    | 182 ± 29     | 0.37007845 | 266 ± 64    | 245 ± 47       | 0.52979636 |
| TAG 56:13 | Positive | 910.7 | 1.32 ± 0.20 | 202 ± 34    | 174 ± 28     | 0.14240388 | 251 ± 49    | 265 ± 69       | 0.68238490 |
| TAG 58:2  | Positive | 960.9 | 1.52 ± 0.12 | 138 ± 26    | 94.7 ± 21.7* | 0.01098611 | 191 ± 44    | 107 ± 32**     | 0.00315013 |
| TAG 58:3  | Positive | 958.9 | 1.57 ± 0.14 | 78.3 ± 14.8 | 56.3 ± 10.9* | 0.01517915 | 104 ± 24    | 63.6 ± 9.3**   | 0.00325850 |
| TAG 58:4  | Positive | 956.9 | 1.62 ± 0.09 | 63.8 ± 12.5 | 47.7 ± 7.6*  | 0.02229952 | 87.2 ± 16.3 | 48.7 ± 11.0*** | 0.00073515 |
| TAG 58:5  | Positive | 954.8 | 1.62 ± 0.15 | 87.4 ± 16.2 | 71.8 ± 10.5  | 0.07512194 | 110 ± 24    | 116 ± 24       | 0.66771445 |
| TAG 58:6  | Positive | 952.8 | 1.49 ± 0.23 | 134 ± 19    | 106 ± 15*    | 0.02140328 | 180 ± 30    | 285 ± 65**     | 0.00507973 |
| TAG 58:7  | Positive | 950.8 | 1.20 ± 0.18 | 261 ± 44    | 192 ± 28**   | 0.00847024 | 429 ± 81    | 558 ± 96*      | 0.02996315 |
| TAG 58:8  | Positive | 948.8 | 1.52 ± 0.32 | 127 ± 21    | 102 ± 15*    | 0.03990968 | 175 ± 29    | 322 ± 107*     | 0.00855050 |

|           |          |        |             |             |               |            |             |                 |            |
|-----------|----------|--------|-------------|-------------|---------------|------------|-------------|-----------------|------------|
| TAG 58:9  | Positive | 946.8  | 1.57 ± 0.38 | 122 ± 20    | 94.2 ± 11.5 * | 0.01500399 | 160 ± 29    | 429 ± 111 **    | 0.00018699 |
| TAG 58:10 | Positive | 944.8  | 1.65 ± 0.42 | 94.7 ± 15.9 | 78.1 ± 10.9   | 0.06054119 | 122 ± 16    | 854 ± 118 ***   | 0.00000003 |
| TAG 58:11 | Positive | 942.8  | 1.62 ± 0.44 | 86.5 ± 12.0 | 79.4 ± 12.7   | 0.34473941 | 111 ± 19    | 1355 ± 187 ***  | 0.00000002 |
| TAG 58:12 | Positive | 940.7  | 1.50 ± 0.48 | 180 ± 41    | 183 ± 36      | 0.88864150 | 245 ± 61    | 1504 ± 157 ***  | 0.00000001 |
| TAG 58:13 | Positive | 938.7  | 1.41 ± 0.41 | 300 ± 63    | 277 ± 61      | 0.52466988 | 420 ± 100   | 367 ± 88        | 0.35668502 |
| TAG 58:14 | Positive | 936.7  | 1.29 ± 0.06 | 320 ± 65    | 270 ± 55      | 0.17905152 | 439 ± 93    | 313 ± 111       | 0.05874272 |
| TAG 60:3  | Positive | 986.9  | 1.65 ± 0.04 | 119 ± 43    | 87.4 ± 26.0   | 0.15460406 | 184 ± 44    | 146 ± 38        | 0.13590073 |
| TAG 60:4  | Positive | 984.9  | 1.68 ± 0.06 | 49.5 ± 13.1 | 35.1 ± 9.0    | 0.05068809 | 69.9 ± 17.1 | 68.5 ± 20.5     | 0.90421247 |
| TAG 60:5  | Positive | 982.9  | 1.67 ± 0.16 | 29.1 ± 7.8  | 22.1 ± 4.5    | 0.08270878 | 35.8 ± 7.6  | 28.4 ± 5.2      | 0.07547040 |
| TAG 60:6  | Positive | 980.9  | 1.42 ± 0.16 | 30.8 ± 3.9  | 22.1 ± 4.4 ** | 0.00491508 | 42.9 ± 8.6  | 29.0 ± 5.1 **   | 0.00672795 |
| TAG 60:7  | Positive | 978.8  | 1.22 ± 0.04 | 156 ± 29    | 104 ± 14 **   | 0.00279711 | 241 ± 41    | 151 ± 15 ***    | 0.00049772 |
| TAG 60:8  | Positive | 976.8  | 1.48 ± 0.11 | 81.8 ± 16.1 | 65.5 ± 9.1    | 0.05616898 | 107 ± 17    | 75.9 ± 18.9 *   | 0.01367412 |
| TAG 60:9  | Positive | 974.8  | 1.55 ± 0.12 | 59.4 ± 8.6  | 48.0 ± 5.0 *  | 0.01890040 | 77.9 ± 12.1 | 90.8 ± 12.5     | 0.09768329 |
| TAG 60:10 | Positive | 972.8  | 1.66 ± 0.26 | 43.5 ± 6.7  | 34.2 ± 4.9 *  | 0.02124692 | 55.6 ± 11.1 | 148 ± 12 ***    | 0.00000009 |
| TAG 60:11 | Positive | 970.8  | 1.42 ± 0.20 | 34.7 ± 4.8  | 31.0 ± 4.9    | 0.21780308 | 48.5 ± 10.3 | 36.1 ± 6.1 *    | 0.03015715 |
| TAG 60:12 | Positive | 968.8  | 1.29 ± 0.06 | 127 ± 20    | 123 ± 21      | 0.71800837 | 175 ± 37    | 80.5 ± 24.0 *** | 0.00036886 |
| TAG 60:13 | Positive | 966.8  | 1.33 ± 0.08 | 504 ± 89    | 426 ± 96      | 0.17234821 | 676 ± 132   | 315 ± 120 ***   | 0.00058472 |
| TAG 60:14 | Positive | 964.7  | 1.37 ± 0.08 | 1590 ± 278  | 1315 ± 277    | 0.11655080 | 2043 ± 414  | 1112 ± 413 **   | 0.00295290 |
| TAG 60:15 | Positive | 962.7  | 1.44 ± 0.11 | 1520 ± 299  | 1266 ± 262    | 0.14844625 | 2013 ± 419  | 1160 ± 411 **   | 0.00517557 |
| TAG 62:4  | Positive | 1012.9 | 1.72 ± 0.06 | 30.3 ± 6.0  | 20.9 ± 5.3 *  | 0.01637455 | 40.9 ± 9.2  | 196 ± 64 **     | 0.00015905 |
| TAG 62:5  | Positive | 1010.9 | 1.76 ± 0.16 | 19.1 ± 3.1  | 15.2 ± 3.1    | 0.05301551 | 25.3 ± 5.2  | 97.0 ± 19.0 *** | 0.00000444 |
| TAG 62:6  | Positive | 1008.9 | 1.52 ± 0.35 | 14.2 ± 1.6  | 10.5 ± 2.8 *  | 0.02066313 | 19.6 ± 3.5  | 57.3 ± 11.1 *** | 0.00001292 |

|           |          |        |             |                |                |            |                |                 |            |
|-----------|----------|--------|-------------|----------------|----------------|------------|----------------|-----------------|------------|
| TAG 62:7  | Positive | 1006.9 | 1.25 ± 0.04 | 34.3 ± 7.1     | 21.1 ± 4.3**   | 0.00288988 | 58.6 ± 10.6    | 55.5 ± 9.0      | 0.59845080 |
| TAG 62:8  | Positive | 1004.9 | 1.47 ± 0.13 | 22.0 ± 4.5     | 16.1 ± 3.0*    | 0.02561916 | 28.3 ± 4.8     | 24.0 ± 3.6      | 0.11110034 |
| TAG 62:9  | Positive | 1002.8 | 1.58 ± 0.11 | 31.2 ± 5.2     | 27.3 ± 3.4     | 0.15239053 | 45.6 ± 10.1    | 55.2 ± 5.5      | 0.06815535 |
| TAG 62:10 | Positive | 1000.8 | 1.63 ± 0.09 | 26.5 ± 4.5     | 21.3 ± 4.7     | 0.07793046 | 33.5 ± 8.2     | 50.2 ± 9.1**    | 0.00738455 |
| TAG 62:11 | Positive | 998.8  | 1.55 ± 0.21 | 20.8 ± 2.8     | 16.9 ± 3.3     | 0.05029285 | 24.9 ± 4.4     | 39.9 ± 7.5**    | 0.00175951 |
| TAG 62:12 | Positive | 996.8  | 1.40 ± 0.21 | 50.2 ± 8.5     | 40.3 ± 5.0*    | 0.03398796 | 59.0 ± 10.3    | 38.9 ± 7.7**    | 0.00333893 |
| TAG 62:13 | Positive | 994.8  | 1.43 ± 0.12 | 177 ± 26       | 152 ± 22       | 0.09673189 | 222 ± 44       | 102 ± 22***     | 0.00014552 |
| TAG 62:14 | Positive | 992.8  | 1.50 ± 0.12 | 481 ± 90       | 437 ± 80       | 0.39490576 | 633 ± 115      | 279 ± 75***     | 0.00009044 |
| TAG 62:15 | Positive | 990.8  | 1.56 ± 0.10 | 739 ± 169      | 707 ± 152      | 0.73145243 | 1030 ± 219     | 541 ± 179**     | 0.00173628 |
| TAG 62:16 | Positive | 988.7  | 1.61 ± 0.06 | 1100 ± 297     | 1070 ± 243     | 0.85435126 | 1514 ± 370     | 984 ± 301*      | 0.02167489 |
| TAG 64:17 | Positive | 1014.8 | 1.68 ± 0.05 | 126 ± 19       | 112 ± 17       | 0.19587354 | 164 ± 32       | 648 ± 210**     | 0.00023194 |
| TAG total |          |        |             | 197453 ± 48984 | 216130 ± 45266 | 0.50835227 | 269026 ± 80862 | 150014 ± 58800* | 0.01541178 |
| FFA 14:0  | Negative | 227.2  | 3.97 ± 0.03 | 12.4 ± 3.9     | 10.4 ± 3.0     | 0.35459489 | 13.2 ± 3.3     | 12.7 ± 2.3      | 0.77196738 |
| FFA 16:0  | Negative | 255.2  | 4.00 ± 0.03 | 221 ± 75       | 183 ± 34       | 0.28632454 | 204 ± 30       | 195 ± 27        | 0.59281497 |
| FFA 16:1  | Negative | 253.2  | 4.05 ± 0.03 | 52.5 ± 35.2    | 38.0 ± 16.2    | 0.38360317 | 47.1 ± 21.0    | 45.6 ± 16.7     | 0.89248600 |
| FFA 18:0  | Negative | 283.3  | 4.04 ± 0.03 | 142 ± 21       | 125 ± 15       | 0.15183219 | 134 ± 21       | 140 ± 11        | 0.54594403 |
| FFA 18:1  | Negative | 281.2  | 4.07 ± 0.03 | 271 ± 124      | 232 ± 60       | 0.50127856 | 247 ± 64       | 229 ± 38        | 0.57198682 |
| FFA 18:2  | Negative | 279.2  | 4.15 ± 0.03 | 257 ± 101      | 199 ± 71       | 0.27456164 | 219 ± 61       | 185 ± 34        | 0.25276592 |
| FFA 18:3  | Negative | 277.2  | 4.23 ± 0.02 | 56.9 ± 30.5    | 43.6 ± 15.6    | 0.36502695 | 53.9 ± 24.2    | 44.9 ± 10.7     | 0.42262107 |
| FFA 20:4  | Negative | 303.2  | 4.35 ± 0.01 | 13.1 ± 2.2     | 9.0 ± 1.9**    | 0.00563612 | 9.5 ± 2.5      | 8.2 ± 2.0       | 0.35335809 |
| FFA 20:5  | Negative | 301.2  | 4.40 ± 0.01 | 0.79 ± 0.32    | 0.45 ± 0.31    | 0.09660903 | 0.68 ± 0.33    | 27.7 ± 7.5***   | 0.00000502 |
| FFA 22:5  | Negative | 329.2  | 4.36 ± 0.01 | 3.1 ± 0.8      | 1.8 ± 0.7*     | 0.01234242 | 2.4 ± 0.5      | 13.6 ± 2.3***   | 0.00000044 |

---

|           |            |           |            |           |           |            |
|-----------|------------|-----------|------------|-----------|-----------|------------|
| FFA total | 1030 ± 388 | 843 ± 208 | 0.32231564 | 931 ± 216 | 902 ± 128 | 0.78010851 |
|-----------|------------|-----------|------------|-----------|-----------|------------|

---

Values are mean ± standard deviation. Statistical significance was determined using Paired *t*-test (\**P* < 0.05, \*\**P* < 0.01, \*\*\**P* < 0.001).
